# Supplementary material for: Targeting Tumour Microtubes to Disrupt Glioma Networks
Source: Research Square preprint supplement (doi:10.21203/rs.3.rs-8605748/v1), 2026-04-07
Supplement: Supplementary file 1 [file 3a7c4ae543f6f4a4b673f8a4.xlsx]

## Sheet: Lidock 
															LibDock score	ADMET_Sloubility	ADMET_Sloubility_level	ADMET_Sloubility	ADMET_Sloubility_level	ADMET_EXT_CYP2D6	ADMET_EXT_CYP2D6_Prediction	ADMET_EXT_CYP2D6_Applicability	ADMET_EXT_CYP2D6_Applicability_MD	ADMET_EXT_CYP2D6_Applicability_MDpvalue	ADMET_EXT_Hepatotoxic	ADMET_EXT_Hepatotoxic_prediction	ADMET_EXT_Hepatotoxic_Applicability	ADMET_EXT_Hepatotoxic_Applicability_MD	ADMET_EXT_Hepatotoxic_Applicability_MDpvaluue	ADMET_Absorption_Level	ADMET_EXT_PPB	ADMET_EXT_PPB_Prediction	ADMET_EXT_PPB_Applicability	ADMET_EXT_PPB_Applicability_MD	ADMET_EXT_PPB_Applicability_MDpvalue	ADMET_AlogP98		AlogP	Molecular weight	Num_H_Donors	Num_H_Acceptors	Num_RotatableBonds	Num_Rings	Num_AromaticRings	Molecular_FractionalPolarSurfaceArea
DA-3177	51598-60-8	HY-U00106	Launched	Other Countries	10mM	7	C21H28BrNO4	2845	GPCR/G Protein; Neuronal Signaling	2.90313	Inflammation/Immunology; Neurological Disease	C[N+]1([C@H]2[C@@H](O3)[C@@H]3[C@@H]1C[C@H](OC([C@@H](C4=CC=CC=C4)CO)=O)C2)CC5CC5.[Br-]	mAChR	1	108.24	-1.649	4	0	-0.95	3	-4.28573	False.1	All properties and OPS components are within expected ranges. Unknown FCFP_2 feature: 609127571: [*]C([*])[N+]1(C)C([*])[*][*]C1[*] Unknown FCFP_2 feature: 136358998: [*][S+]([*])C Unknown FCFP_2 feature: -2076001612: [*]CC1C[*][*][N+]1([*])[*]	11.9037	0.00362449	-12.1375	False.2	All properties and OPS components are within expected ranges.	8.49551	0.706866	0.3	-29.1226	False.4	All properties and OPS components are within expected ranges..1	9.73206	0.953467	0.289	55.976	0.289.1	358.451	1.1	4.1	7.1	5	1.2	Z
LX-4211; LP-802034	1018899-04-1	HY-15516	Launched	EMA	10mM	45	C21H25ClO5S	2506	Membrane Transporter/Ion Channel	5.2563	Metabolic Disease	ClC(C=CC([C@@H]1O[C@H](SC)[C@@H](O)[C@H](O)[C@H]1O)=C2)=C2CC3=CC=C(OCC)C=C3	SGLT	1	123.337	-4.189	2	0	-0.271	2	0.247334	FALSE	All properties and OPS components are within expected ranges.	13.4574	0.00010126	-5.52189	FALSE	All properties and OPS components are within expected ranges.	15.7954	2.03e-13	0	1.31464	TRUE	All properties and OPS components are within expected ranges.	15.6506	1.49e-08	3.734	80.306	3.734	424.938	3	6	6	3	2	0.25
FTY720 free base	162359-55-9	HY-11063	Launched	EMA; FDA	2mM	79	C19H33NO2	136	Cell Cycle/DNA Damage; Cytoskeleton; GPCR/G Protein	9.76387	Cancer; Inflammation/Immunology	OCC(CCC1=CC=C(CCCCCCCC)C=C1)(N)CO	LPL Receptor; PAK	1	119.979	-3.038	3	0	0.065	1	-0.836102	FALSE	All properties and OPS components are within expected ranges.	12.3712	0.0013015	-7.74439	FALSE	All properties and OPS components are within expected ranges.	8.13302	0.8477	0	1.69036	TRUE	All properties and OPS components are within expected ranges.	11.4886	0.252821	4.199	68.17	4.198	307.471	3	3	12	1	1	0.179
Nefazodone	83366-66-9	HY-119209	Launched	FDA	10mM	124	C25H32ClN5O2	1797	GPCR/G Protein; Metabolic Enzyme/Protease; Neuronal Signaling	7.06505	Inflammation/Immunology; Neurological Disease	O=C1N(N=C(N1CCOC2=CC=CC=C2)CC)CCCN3CCN(CC3)C4=CC=CC(Cl)=C4	5-HT Receptor; Cytochrome P450	1	118.988	-4.604	2	0	0.404	1	-31.2793	FALSE	All properties and OPS components are within expected ranges.	9.77208	0.160866	-1.99515	TRUE	All properties and OPS components are within expected ranges.	14.0508	7.47e-09	0	15.9435	TRUE	OPS PC11 out of range. Value: -5.6212. Training min, max, SD, explained variance: -5.2845, 6.3989, 1.696, 0.0237.	12.9863	0.00587825	4.415	50.964	4.415	470.007	0	5	10	4	2	0.105
BMY-13754; MJ-13754-1	82752-99-6	HY-B1396	Launched	FDA	10mM	124	C25H33Cl2N5O2	2301	GPCR/G Protein; Neuronal Signaling	7.06505	Neurological Disease; Endocrinology	O=C1N(CCCN2CCN(C3=CC=CC(Cl)=C3)CC2)N=C(CC)N1CCOC4=CC=CC=C4.[H]Cl	5-HT Receptor; Adrenergic Receptor	1	118.988	-4.604	2	0	0.404	1	-31.2793	FALSE	All properties and OPS components are within expected ranges.	9.77208	0.160866	-1.99515	TRUE	All properties and OPS components are within expected ranges.	14.0508	7.47e-09	0	15.9435	TRUE	OPS PC11 out of range. Value: -5.6212. Training min, max, SD, explained variance: -5.2845, 6.3989, 1.696, 0.0237.	12.9863	0.00587825	4.415	50.964	4.415	470.007	0	5	10	4	2	0.105
W-3566	152-43-2	HY-B1012	Launched	FDA; NMPA	10mM	22	C25H32O2	1318	Vitamin D Related/Nuclear Receptor	4.45703	Endocrinology; Cancer	C#C[C@]1(O)CC[C@@]2([H])[C@]3([H])CCC4=C(C=CC(OC5CCCC5)=C4)[C@@]3([H])CC[C@]12C	Estrogen Receptor/ERR	1	118.131	-7.298	1	0	1.389	0	-0.385122	FALSE	All properties and OPS components are within expected ranges.	14.9769	2.17e-06	-6.14719	FALSE	All properties and OPS components are within expected ranges.	9.49753	0.232443	1	27.2213	TRUE	All properties and OPS components are within expected ranges.	9.6135	0.967503	6.514	29.745	6.514	364.52	1	2	2	5	1	0.08
ASP1941	761423-87-4	HY-14894	Launched	Other Countries	10mM	155	C21H21FO5S	2638	Membrane Transporter/Ion Channel	12.9069	Metabolic Disease	FC1=CC=C([C@H]2[C@H](O)[C@@H](O)[C@H](O)[C@@H](CO)O2)C=C1CC3=CC(C=CC=C4)=C4S3	SGLT	1	117.32	-3.46	3	0	-0.914	3	-1.16831	FALSE	All properties and OPS components are within expected ranges.	14.972	2.19e-06	-0.205343	TRUE	All properties and OPS components are within expected ranges.	11.5705	0.000865219	0	0.163503	TRUE	All properties and OPS components are within expected ranges.	14.9142	1.07e-06	2.259	92.192	2.35	404.452	4	5	4	4	3	0.315
Ipragliflozin	951382-34-6	HY-14894A	Launched	Other Countries	10mM	155	C26H30FNO7S	2639	Membrane Transporter/Ion Channel	12.9069	Metabolic Disease	FC1=CC=C([C@H]2[C@H](O)[C@@H](O)[C@H](O)[C@@H](CO)O2)C=C1CC3=CC(C=CC=C4)=C4S3.O=C(O)[C@H]5NCCC5	SGLT	1	117.32	-3.46	3	0	-0.914	3	-1.16831	FALSE	All properties and OPS components are within expected ranges.	14.972	2.19e-06	-0.205343	TRUE	All properties and OPS components are within expected ranges.	11.5705	0.000865219	0	0.163503	TRUE	All properties and OPS components are within expected ranges.	14.9142	1.07e-06	2.259	92.192	2.35	404.452	4	5	4	4	3	0.315
MK-906	98319-26-7	HY-13635	Launched	FDA; NMPA	10mM	29	C23H36N2O2	264	Metabolic Enzyme/Protease	6.53513	Cancer	O=C([C@H]1CC[C@]2([H])[C@]1(C)CC[C@]3([H])[C@@]4(C)C=CC(N[C@]4([H])CC[C@]32[H])=O)NC(C)(C)C	5 alpha Reductase	1	117.123	-4.987	2	0	-0.126	2	-4.74581	FALSE	All properties and OPS components are within expected ranges.	13.5046	9.02e-05	-1.95744	TRUE	All properties and OPS components are within expected ranges.	9.31053	0.30888	0	20.1895	TRUE	All properties and OPS components are within expected ranges.	11.5078	0.24507	3.174	60.222	3.174	372.544	2	2	2	4	0	0.142
HSR803	122892-31-3	HY-B0732	Launched	NMPA	10mM	47	C20H27ClN2O4	1270	Anti-infection; GPCR/G Protein; Neuronal Signaling	5.76816	Neurological Disease	O=C(NCC1=CC=C(OCCN(C)C)C=C1)C2=CC=C(OC)C(OC)=C2.Cl	Bacterial; Cholinesterase (ChE); Dopamine Receptor	1	116.998	-3.278	3	0	-0.27	2	-4.58892	FALSE	OPS PC6 out of range. Value: 4.1467. Training min, max, SD, explained variance: -5.674, 3.9834, 1.993, 0.0519.	10.589	0.0460594	-0.768053	TRUE	All properties and OPS components are within expected ranges.	11.2109	0.00310219	0	3.3621	TRUE	OPS PC16 out of range. Value: -5.5957. Training min, max, SD, explained variance: -4.8145, 4.584, 1.413, 0.0165.	12.0686	0.081037	2.711	60.253	2.711	358.431	1	5	9	2	2	0.147
BM15075	41859-67-0	HY-B0637	Launched	EMA; NMPA	10mM	70	C19H20ClNO4	1228	Cell Cycle/DNA Damage; Vitamin D Related/Nuclear Receptor	12.7069	Metabolic Disease; Cardiovascular Disease	CC(C)(OC1=CC=C(CCNC(C2=CC=C(Cl)C=C2)=O)C=C1)C(O)=O	PPAR	1	116.821	-4.276	2	0	-0.179	2	-3.10481	FALSE	All properties and OPS components are within expected ranges.	14.7192	4.22e-06	-2.45928	TRUE	All properties and OPS components are within expected ranges.	12.0941	0.000109652	0	18.7681	TRUE	All properties and OPS components are within expected ranges.	12.4211	0.0333211	3.868	77.157	3.868	361.819	2	4	7	2	2	0.203
Bisoprolol hemifumarate	104344-23-2	HY-B0076	Launched	FDA; NMPA	10mM	206	C18H31NO4.1/2C4H4O4	832	GPCR/G Protein; Neuronal Signaling	15.1626	Cancer; Endocrinology; Inflammation/Immunology; Cardiovascular Disease	OC(CNC(C)C)COC1=CC=C(COCCOC(C)C)C=C1.OC(/C=C/C(O)=O)=O	Adrenergic Receptor	1	114.901	-1.879	4	0	-0.482	2	2.13615	TRUE	All properties and OPS components are within expected ranges.	14.9151	2.54e-06	-29.8287	FALSE	All properties and OPS components are within expected ranges.	9.21288	0.353125	0	-33.2391	FALSE	All properties and OPS components are within expected ranges.	8.66145	0.999352	2.031	60.416	2.031	325.443	2	5	12	1	1	0.156
FCE 26743; EMD 1195686	133865-89-1	HY-70057	Launched	EMA; FDA	10mM	26	C17H19FN2O2	713	Neuronal Signaling	5.40563	Neurological Disease	O=C([C@@H](NCC1=CC=C(OCC2=CC(F)=CC=C2)C=C1)C)N	Monoamine Oxidase	1	114.708	-3.484	3	0	-0.426	2	-1.26794	FALSE	All properties and OPS components are within expected ranges.	14.104	2.03e-05	-3.15221	TRUE	All properties and OPS components are within expected ranges.	10.031	0.0841775	0	0.88508	TRUE	All properties and OPS components are within expected ranges.	11.3922	0.293939	2.478	65.581	2.478	302.343	2	3	7	2	2	0.201
GR-85548A hydrochloride	143388-64-1	HY-B0197A	Launched	FDA	10mM	38	C17H26ClN3O2S	2079	GPCR/G Protein; Neuronal Signaling	17.7371	Neurological Disease	O=S(CCC1=CC2=C(NC=C2C3CCN(C)CC3)C=C1)(NC)=O.Cl	5-HT Receptor	1	114.595	-3.873	3	0	-0.561	3	-5.35171	FALSE	All properties and OPS components are within expected ranges.	14.7392	4.01e-06	-3.86848	TRUE	All properties and OPS components are within expected ranges.	12.9294	2.55e-06	0	-19.3504	FALSE	All properties and OPS components are within expected ranges.	11.5477	0.22931	2.053	65.819	2.053	335.464	2	3	5	3	2	0.211
GR 33343X xinafoate	94749-08-3	HY-17453	Launched	EMA; FDA; NMPA	10mM	216	C36H45NO7	603	GPCR/G Protein; Neuronal Signaling	16.1279	Inflammation/Immunology; Endocrinology	O=C(C1=CC=C2C=CC=CC2=C1O)O.OC3=C(CO)C=C(C(CNCCCCCCOCCCCC4=CC=CC=C4)O)C=C3	Adrenergic Receptor	1	114.496	-2.479	3	0	-0.172	2	1.95043	TRUE	All properties and OPS components are within expected ranges.	13.625	6.71e-05	-17.2028	FALSE	All properties and OPS components are within expected ranges.	10.2892	0.0461684	0	20.5042	TRUE	All properties and OPS components are within expected ranges.	11.0986	0.43569	4.251	84.186	4.251	415.566	4	5	16	2	2	0.178
BY1023; SKF96022	102625-70-7	HY-17507	Launched	EMA; FDA; NMPA	10mM	85	C16H15F2N3O4S	628	Anti-infection; Apoptosis; Autophagy; Membrane Transporter/Ion Channel	8.62116	Cancer; Inflammation/Immunology	O=S(C1=NC2=CC=C(OC(F)F)C=C2N1)CC3=NC=CC(OC)=C3OC	Apoptosis; Autophagy; Bacterial; Proton Pump	1	114.409	-4.324	2	0	-0.6	3	-18.9156	FALSE	All properties and OPS components are within expected ranges. Unknown FCFP_2 feature: -814345653: [*]OC(F)F	14.5518	6.5e-06	-30.797	FALSE	All properties and OPS components are within expected ranges.	10.818	0.0108802	0	32.5624	TRUE	All properties and OPS components are within expected ranges.	8.74502	0.99901	2.737	81.668	2.737	383.37	1	6	7	3	3	0.283
MK-3102	1226781-44-7	HY-15981	Launched	Other Countries	10mM	104	C17H20F2N4O3S	2652	Metabolic Enzyme/Protease	6.28307	Metabolic Disease; Neurological Disease	N[C@@H]1[C@@H](C2=CC(F)=CC=C2F)OC[C@H](N3CC4=NN(S(=O)(C)=O)C=C4C3)C1	Dipeptidyl Peptidase	1	113.342	-3.925	3	0	-1.239	3	-5.63357	FALSE	All properties and OPS components are within expected ranges. Unknown FCFP_2 feature: 646501670: [*]:n(:[*])S(=O)(=O)C	17.0316	9.44e-09	-2.48054	TRUE	All properties and OPS components are within expected ranges. Unknown FCFP_2 feature: 646501670: [*]:n(:[*])S(=O)(=O)C	15.3781	2.87e-12	0	-0.66188	TRUE	All properties and OPS components are within expected ranges. Unknown FCFP_2 feature: 646501670: [*]:n(:[*])S(=O)(=O)C	15.2289	1.83e-07	1.098	90.033	1.098	398.428	1	6	3	4	2	0.266
EPA; Timnodonic acid	10417-94-4	HY-B0660	Launched	FDA	10mM	147	C20H30O2	2169	Epigenetics; Metabolic Enzyme/Protease	10.299	Neurological Disease; Cancer	CC/C=C\C/C=C\C/C=C\C/C=C\C/C=C\CCCC(O)=O	Endogenous Metabolite; Histone Demethylase	1	112.683	-4.395	2	0	1.096	0	-1.49247	FALSE	All properties and OPS components are within expected ranges.	11.9587	0.00322202	-10.3164	FALSE	All properties and OPS components are within expected ranges.	8.43556	0.733428	1	2.03136	TRUE	All properties and OPS components are within expected ranges.	8.94323	0.99747	5.994	38.116	5.994	302.451	1	2	13	0	0	0.1
OZ 277; RBx 11160	664338-39-0	HY-10852	Launched	Other Countries	10mM	247	C22H36N2O4	2567	Anti-infection	8.72196	Infection	O=C(NCC(N)(C)C)C[C@H](CC1)CC[C@]21OO[C@]3(O2)[C@H]4C[C@@H]5C[C@H](C4)C[C@H]3C5	Parasite	1	112.638	-5.399	2	0	-0.508	2	-10.344	FALSE	All properties and OPS components are within expected ranges.	13.0148	0.000294003	-11.1534	FALSE	All properties and OPS components are within expected ranges.	9.56864	0.206604	0	-8.21768	FALSE	All properties and OPS components are within expected ranges.	11.9613	0.103122	3.125	83.441	1.984	392.532	2	5	4	6	0	0.213
U 72107	111025-46-8	HY-13956	Launched	EMA; FDA; NMPA	10mM	86	C19H20N2O3S	311	Apoptosis; Cell Cycle/DNA Damage; Vitamin D Related/Nuclear Receptor	8.43796	Metabolic Disease; Cancer	O=C(N1)SC(CC2=CC=C(OCCC3=NC=C(CC)C=C3)C=C2)C1=O	Ferroptosis; PPAR	1	111.674	-4.911	2	0	0.044	1	-5.61138	FALSE	All properties and OPS components are within expected ranges.	15.033	1.87e-06	-21.2664	FALSE	All properties and OPS components are within expected ranges.	9.71374	0.159748	0	21.1035	TRUE	All properties and OPS components are within expected ranges.	11.4275	0.278523	4.102	67.602	3.907	356.439	1	5	7	3	2	0.262
Volitinib; HMPL-504; AZD-6094	1313725-88-0	HY-15959	Launched	NMPA	10mM	2	C17H15N9	489	Protein Tyrosine Kinase/RTK	0.0378261	Cancer	CN1N=CC(C2=CN=C3C(N([C@H](C4=CN5C(C=C4)=NC=C5)C)N=N3)=N2)=C1	c-Met/HGFR	1	110.772	-3.613	3	0	-1.04	3	-4.91191	FALSE	All properties and OPS components are within expected ranges. Unknown FCFP_2 feature: -1564473960: [*]:n:[c]1:n:[*]:[*]:[c]:1:[*] Unknown FCFP_2 feature: 813952683: [*]:n(:[*])C(C)[c](:[*]):[*] Unknown FCFP_2 feature: -203115083: [*]:[c]1:[*]:[*]:c:n:1:c:[*]	10.572	0.0474056	0.318815	TRUE	All properties and OPS components are within expected ranges. Unknown FCFP_2 feature: 813952683: [*]:n(:[*])C(C)[c](:[*]):[*] Unknown FCFP_2 feature: -203115083: [*]:[c]1:[*]:[*]:c:n:1:c:[*]	11.5503	0.000932482	0	-0.678896	TRUE	All properties and OPS components are within expected ranges.	12.6029	0.0198754	1.415	83.61	1.032	345.361	0	6	3	5	5	0.264
NIK333	81485-25-8	HY-100008	Launched	EMA	10mM	134	C20H30O2	2464	Anti-infection; Autophagy; Immunology/Inflammation; Metabolic Enzyme/Protease; Vitamin D Related/Nuclear Receptor	11.9056	Cancer; Infection	C/C(C)=C/CC/C(C)=C/CC/C(C)=C/C=C/C(C)=C/C(O)=O	Autophagy; HCV; RAR/RXR; SphK	1	109.677	-5.413	2	0	1.214	0	-0.467075	FALSE	All properties and OPS components are within expected ranges.	12.3443	0.00138223	-8.14084	FALSE	All properties and OPS components are within expected ranges.	9.50157	0.230925	1	9.72116	TRUE	All properties and OPS components are within expected ranges.	10.4625	0.751658	6.376	38.116	6.377	302.451	1	2	9	0	0	0.096
Dobutamine hydrochloride	49745-95-1	HY-15746	Launched	FDA	10mM	32	C18H24ClNO3	1927	GPCR/G Protein; Neuronal Signaling	3.67608	Cardiovascular Disease; Endocrinology; Cancer	OC1=CC=C(CCNC(C)CCC2=CC=C(O)C=C2)C=C1O.[H]Cl	Adrenergic Receptor	1	109.501	-3.095	3	0	-0.201	2	1.47963	TRUE	All properties and OPS components are within expected ranges.	10.1215	0.0976828	-3.16316	TRUE	All properties and OPS components are within expected ranges.	7.65515	0.953647	0	-12.9023	FALSE	All properties and OPS components are within expected ranges.	9.1611	0.993575	3.701	75.256	3.701	301.38	4	4	7	2	2	0.225
Th-1165; Phenoterol	13392-18-2	HY-B0976	Launched	Other Countries	10mM	238	C17H21NO4	2752	GPCR/G Protein; Neuronal Signaling	15.5266	Inflammation/Immunology; Endocrinology	OC1=CC(C(O)CNC(C)CC2=CC=C(O)C=C2)=CC(O)=C1	Adrenergic Receptor	1	109.317	-2.139	3	0	-0.928	3	1.52319	TRUE	All properties and OPS components are within expected ranges.	11.9475	0.00330014	-14.2151	FALSE	All properties and OPS components are within expected ranges.	7.70719	0.946183	0	-25.769	FALSE	All properties and OPS components are within expected ranges.	8.11485	0.999973	2.413	96.072	2.413	303.353	5	5	6	2	2	0.294
Pramoxine hydrochloride	637-58-1	HY-B1319	Launched	FDA	10mM	23	C17H28ClNO3	2282	Others	8.35072	Neurological Disease	CCCCOC1=CC=C(OCCCN2CCOCC2)C=C1.[H]Cl	Others	1	108.226	-3.228	3	0	0.301	1	0.736017	TRUE	All properties and OPS components are within expected ranges.	12.6275	0.000726756	-8.29681	FALSE	All properties and OPS components are within expected ranges.	9.6869	0.167816	0	0.0295078	TRUE	OPS PC24 out of range. Value: -3.5487. Training min, max, SD, explained variance: -3.3171, 3.4805, 1.198, 0.0118.	10.92	0.528594	3.014	30.142	3.014	293.401	0	4	9	2	1	0.092
BRL 49653C	155141-29-0	HY-14600	Launched	EMA; FDA; NMPA	10mM	15	C22H23N3O7S	359	Apoptosis; Autophagy; Cell Cycle/DNA Damage; Membrane Transporter/Ion Channel; Neuronal Signaling; Vitamin D Related/Nuclear Receptor	3.15585	Cancer; Metabolic Disease; Inflammation/Immunology	O=C(O)/C=C\C(O)=O.CN(CCOC1=CC=C(CC2C(NC(S2)=O)=O)C=C1)C3=CC=CC=N3	Autophagy; Ferroptosis; PPAR; TRP Channel	1	107.083	-4.37	2	0	-0.207	2	-3.5372	FALSE	All properties and OPS components are within expected ranges.	12.7396	0.000560869	-20.29	FALSE	All properties and OPS components are within expected ranges.	11.4556	0.00131778	0	19.9668	TRUE	All properties and OPS components are within expected ranges.	12.4031	0.034992	3.462	70.955	3.268	357.427	1	6	7	3	2	0.269
Dihydrocapsiate	205687-03-2	HY-124073	Launched	FDA	10mM	147	C18H28O4	1814	Membrane Transporter/Ion Channel; Neuronal Signaling	10.1908	Metabolic Disease	CC(C)CCCCCCC(OCC1=CC=C(O)C(OC)=C1)=O	TRP Channel	1	106.737	-4.323	2	0	0.506	1	-2.09377	FALSE	All properties and OPS components are within expected ranges.	15.7188	3.1e-07	-21.5691	FALSE	All properties and OPS components are within expected ranges.	11.059	0.00512811	0	0.646875	TRUE	All properties and OPS components are within expected ranges.	10.3112	0.811579	5.002	55.976	5.002	308.413	1	4	11	1	1	0.156
PNU180638	181183-52-8	HY-B0383	Launched	FDA	10mM	58	C21H31N3O7S	2120	GPCR/G Protein; Neuronal Signaling	10.4808	Neurological Disease	O=C(O)C(O)CC(O)=O.O=S(CC1=CC2=C(NC=C2CCN(C)C)C=C1)(N3CCCC3)=O	5-HT Receptor	1	106.736	-3.687	3	0	-0.396	2	-6.83956	FALSE	All properties and OPS components are within expected ranges. Unknown FCFP_2 feature: 1704082462: [*]CS(=O)(=O)N([*])[*]	17.6884	1.63e-09	-2.24216	TRUE	All properties and OPS components are within expected ranges. Unknown FCFP_2 feature: 1704082462: [*]CS(=O)(=O)N([*])[*]	12.7268	6.67e-06	0	-16.6558	FALSE	All properties and OPS components are within expected ranges. Unknown FCFP_2 feature: 1704082462: [*]CS(=O)(=O)N([*])[*]	11.9995	0.0947907	2.103	56.361	2.103	335.464	1	3	6	3	2	0.182
Almotriptan	154323-57-6	HY-B0383A	Launched	FDA	10mM	58	C17H25N3O2S	2121	GPCR/G Protein; Neuronal Signaling	10.4808	Neurological Disease	O=S(CC1=CC2=C(NC=C2CCN(C)C)C=C1)(N3CCCC3)=O	5-HT Receptor	1	106.736	-3.687	3	0	-0.396	2	-6.83956	FALSE	All properties and OPS components are within expected ranges. Unknown FCFP_2 feature: 1704082462: [*]CS(=O)(=O)N([*])[*]	17.6884	1.63e-09	-2.24216	TRUE	All properties and OPS components are within expected ranges. Unknown FCFP_2 feature: 1704082462: [*]CS(=O)(=O)N([*])[*]	12.7268	6.67e-06	0	-16.6558	FALSE	All properties and OPS components are within expected ranges. Unknown FCFP_2 feature: 1704082462: [*]CS(=O)(=O)N([*])[*]	11.9995	0.0947907	2.103	56.361	2.103	335.464	1	3	6	3	2	0.182
Fipexide	34161-24-5	HY-B1124	Launched	Other Countries	10mM	9	C20H21ClN2O4	2767	GPCR/G Protein; Neuronal Signaling	4.06359	Neurological Disease	ClC1=CC=C(OCC(N2CCN(CC3=CC=C(OCO4)C4=C3)CC2)=O)C=C1	Adenylate Cyclase; Dopamine Transporter	1	106.501	-4.073	2	0	-0.014	2	-3.93139	FALSE	All properties and OPS components are within expected ranges.	11.6455	0.00623136	-2.43229	TRUE	All properties and OPS components are within expected ranges.	11.9015	0.000240991	0	3.5812	TRUE	All properties and OPS components are within expected ranges.	11.8489	0.130738	3.052	50.796	3.052	388.845	0	5	5	4	2	0.135
Fipexide hydrochloride	34161-23-4	HY-B1124A	Launched	Other Countries	10mM	9	C20H22Cl2N2O4	2768	GPCR/G Protein; Neuronal Signaling	4.06359	Neurological Disease	ClC1=CC=C(OCC(N2CCN(CC3=CC=C(OCO4)C4=C3)CC2)=O)C=C1.[H]Cl	Adenylate Cyclase; Dopamine Transporter	1	106.501	-4.073	2	0	-0.014	2	-3.93139	FALSE	All properties and OPS components are within expected ranges.	11.6455	0.00623136	-2.43229	TRUE	All properties and OPS components are within expected ranges.	11.9015	0.000240991	0	3.5812	TRUE	All properties and OPS components are within expected ranges.	11.8489	0.130738	3.052	50.796	3.052	388.845	0	5	5	4	2	0.135
Betaxolol	63659-18-7	HY-B0381	Launched	FDA; NMPA	10mM	71	C18H29NO3	1067	GPCR/G Protein; Neuronal Signaling	9.31139	Cardiovascular Disease; Endocrinology	OC(CNC(C)C)COC1=CC=C(CCOCC2CC2)C=C1	Adrenergic Receptor	1	106.291	-2.436	3	0	-0.172	2	1.79213	TRUE	All properties and OPS components are within expected ranges.	14.1678	1.73e-05	-17.2461	FALSE	OPS PC4 out of range. Value: -4.7074. Training min, max, SD, explained variance: -4.6928, 7.4417, 2.104, 0.0552.	10.2108	0.055825	0	-34.0512	FALSE	All properties and OPS components are within expected ranges.	9.12459	0.994465	2.577	51.485	2.577	307.428	2	4	11	2	1	0.148
SL75212	63659-19-8	HY-B0381A	Launched	FDA; NMPA	10mM	71	C18H30ClNO3	1068	GPCR/G Protein; Neuronal Signaling	9.31139	Cardiovascular Disease; Endocrinology	OC(CNC(C)C)COC1=CC=C(CCOCC2CC2)C=C1.[H]Cl	Adrenergic Receptor	1	106.291	-2.436	3	0	-0.172	2	1.79213	TRUE	All properties and OPS components are within expected ranges.	14.1678	1.73e-05	-17.2461	FALSE	OPS PC4 out of range. Value: -4.7074. Training min, max, SD, explained variance: -4.6928, 7.4417, 2.104, 0.0552.	10.2108	0.055825	0	-34.0512	FALSE	All properties and OPS components are within expected ranges.	9.12459	0.994465	2.577	51.485	2.577	307.428	2	4	11	2	1	0.148
(S)-Betaxolol hydrochloride; AL-1577A	116209-55-3	HY-B0381B	Launched	FDA	10mM	71	C18H30ClNO3	2119	GPCR/G Protein; Neuronal Signaling	9.31139	Neurological Disease; Endocrinology	O[C@@H](CNC(C)C)COC1=CC=C(CCOCC2CC2)C=C1.[H]Cl	Adrenergic Receptor	1	106.291	-2.436	3	0	-0.172	2	1.79213	TRUE	All properties and OPS components are within expected ranges.	14.1678	1.73e-05	-17.2461	FALSE	OPS PC4 out of range. Value: -4.7074. Training min, max, SD, explained variance: -4.6928, 7.4417, 2.104, 0.0552.	10.2108	0.055825	0	-34.0512	FALSE	All properties and OPS components are within expected ranges.	9.12459	0.994465	2.577	51.485	2.577	307.428	2	4	11	2	1	0.148
ACP-103	706779-91-1	HY-14557	Launched	FDA	10mM	205	C25H34FN3O2	1896	GPCR/G Protein; Neuronal Signaling	16.897	Neurological Disease	CC(C)COC1=CC=C(CNC(N(CC2=CC=C(F)C=C2)C3CCN(C)CC3)=O)C=C1	5-HT Receptor	1	106.155	-4.698	2	0	0.431	1	3.52066	TRUE	All properties and OPS components are within expected ranges.	13.4309	0.000108045	-1.97707	TRUE	All properties and OPS components are within expected ranges.	10.9954	0.00628923	0	5.26755	TRUE	All properties and OPS components are within expected ranges.	13.6422	0.000493275	4.234	45.746	4.234	427.555	1	3	8	3	2	0.095
Tetradecyl sulfate sodium	1191-50-0	HY-W195048	Launched	FDA	10mM	72	C14H29NaO4S	2457	Others	8.45947	Cardiovascular Disease	O=S(OCCCCCCCCCCCCCC)(O[Na])=O	Others	1	105.901	-4.254	2	1	0.641	1	-2.22177	FALSE	All properties and OPS components are within expected ranges. Unknown FCFP_2 feature: -1533274251: [*]OS(=O)(=O)O[*]	15.4204	6.8e-07	-12.0381	FALSE	All properties and OPS components are within expected ranges. Unknown FCFP_2 feature: -1533274251: [*]OS(=O)(=O)O[*]	7.86044	0.918845	0	1.2852	TRUE	All properties and OPS components are within expected ranges. Unknown FCFP_2 feature: -1533274251: [*]OS(=O)(=O)O[*]	11.3724	0.302777	5.259	52.461	5.413	316.432	0	4	15	0	0	0.16
DHA; Cervonic acid	6217-54-5	HY-B2167	Launched	EMA	10mM	203	C22H32O2	2527	Metabolic Enzyme/Protease	15.6046	Neurological Disease; Cancer	CC/C=C\C/C=C\C/C=C\C/C=C\C/C=C\C/C=C\CCC(O)=O	Endogenous Metabolite	1	105.657	-4.629	2	0	1.24	0	-2.45526	FALSE	All properties and OPS components are within expected ranges.	13.1492	0.000213433	-8.15986	FALSE	All properties and OPS components are within expected ranges.	9.17709	0.369969	1	1.97026	TRUE	All properties and OPS components are within expected ranges.	9.68	0.960126	6.462	38.116	6.462	328.488	1	2	14	0	0	0.093
Bevantolol hydrochloride	42864-78-8	HY-121186	Launched	NMPA	10mM	88	C20H28ClNO4	161	GPCR/G Protein; Membrane Transporter/Ion Channel; Neuronal Signaling	10.8229	Metabolic Disease; Neurological Disease	OC(CNCCC1=CC=C(C(OC)=C1)OC)COC2=CC=CC(C)=C2.[H]Cl	Adrenergic Receptor; Calcium Channel	1	105.621	-3.347	3	0	-0.101	2	-2.33972	FALSE	OPS PC6 out of range. Value: 4.0063. Training min, max, SD, explained variance: -5.674, 3.9834, 1.993, 0.0519.	15.0612	1.74e-06	-8.59305	FALSE	OPS PC4 out of range. Value: -5.0211. Training min, max, SD, explained variance: -4.6928, 7.4417, 2.104, 0.0552.	11.45	0.00134469	0	11.9765	TRUE	All properties and OPS components are within expected ranges.	9.57709	0.971049	3.263	60.416	3.263	345.433	2	5	10	2	2	0.155
Ro 40-5967 (dihydrochloride)	116666-63-8	HY-15553A	Launched	FDA	10mM	126	C29H40Cl2FN3O3	1921	Membrane Transporter/Ion Channel; Neuronal Signaling	12.6097	Cardiovascular Disease; Cancer	O=C(O[C@@]1(CCN(CCCC2=NC3=CC=CC=C3N2)C)[C@@H](C(C)C)C4=C(C=C(F)C=C4)CC1)COC.[H]Cl.[H]Cl	Calcium Channel	1	105.381	-6.073	1	0	0.481	1	-3.2173	FALSE	All properties and OPS components are within expected ranges.	17.6292	1.91e-09	-3.32556	TRUE	All properties and OPS components are within expected ranges.	15.0372	2.36e-11	0	6.49622	TRUE	All properties and OPS components are within expected ranges.	13.7184	0.000358428	5.373	64.829	5.373	495.629	1	5	12	4	3	0.125
Polyoxyethylene lauryl ether; Polyoxyethyleneglycol Dodecyl Ether	9002-92-0	HY-B2106	Launched	FDA; NMPA	3mg/mL	175	(C2H4O)nC12H26O	1504	Others	12.7575	Cardiovascular Disease	OCCCOCCCCCCCCCCCCC.[n]	Others	1	104.565	-3.32	3	0	0.923	0	1.6199	TRUE	All properties and OPS components are within expected ranges.	14.3902	9.83e-06	-13.6779	FALSE	All properties and OPS components are within expected ranges.	7.62553	0.95752	0	3.91822	TRUE	All properties and OPS components are within expected ranges.	10.2897	0.819348	5.007	29.745	5.008	258.44	1	2	15	0	0	0.089
Buphenine hydrochloride	849-55-8	HY-B1404	Launched	Other Countries	10mM	233	C19H26ClNO2	2798	Others	13.4074	Inflammation/Immunology	OC(C(NC(C)CCC1=CC=CC=C1)C)C2=CC=C(O)C=C2.[H]Cl	Others	1	103.8	-3.273	3	0	0.138	1	2.39761	TRUE	All properties and OPS components are within expected ranges.	11.2295	0.0143212	-9.53047	FALSE	All properties and OPS components are within expected ranges.	8.67381	0.622197	0	-11.2794	FALSE	All properties and OPS components are within expected ranges.	9.65757	0.962749	3.73	54.441	3.73	299.407	3	3	7	2	2	0.159
Esmolol hydrochloride	81161-17-3	HY-B1392	Launched	FDA; NMPA	10mM	68	C16H26ClNO4	1427	Autophagy; GPCR/G Protein; Neuronal Signaling	7.87344	Cardiovascular Disease; Endocrinology; Cancer	O=C(OC)CCC1=CC=C(OCC(O)CNC(C)C)C=C1.[H]Cl	Adrenergic Receptor; Autophagy; Mitophagy	1	103.784	-2.061	3	0	-0.631	3	-1.674	FALSE	All properties and OPS components are within expected ranges.	16.3474	5.86e-08	-18.1266	FALSE	All properties and OPS components are within expected ranges.	12.3624	3.48e-05	0	-29.066	FALSE	All properties and OPS components are within expected ranges.	9.47419	0.979401	1.978	68.786	1.978	295.374	2	5	10	1	1	0.2
PXD101; PX105684	866323-14-0	HY-10225	Launched	FDA	10mM	70	C15H14N2O4S	1710	Autophagy; Cell Cycle/DNA Damage; Epigenetics	11.9488	Cancer	O=S(NC1=CC=CC=C1)(C2=CC(/C=C/C(NO)=O)=CC=C2)=O	Autophagy; HDAC	1	103.546	-2.488	3	0	-1.205	3	-14.7813	FALSE	All properties and OPS components are within expected ranges. Unknown FCFP_2 feature: 1666606459: [*]C(=[*])NO Unknown FCFP_2 feature: -548542844: [*]NO	10.6718	0.0399382	-0.744872	TRUE	All properties and OPS components are within expected ranges. Unknown FCFP_2 feature: 1666606459: [*]C(=[*])NO Unknown FCFP_2 feature: -548542844: [*]NO	10.0366	0.083148	0	4.62914	TRUE	All properties and OPS components are within expected ranges.	13.2706	0.00213232	1.633	98.338	1.8	318.348	3	4	5	2	2	0.347
U75630	64622-45-3	HY-101482	Launched	FDA	10mM	8	C19H23NO2	1706	Others	1.46073	Inflammation/Immunology	O=C(OCC1=NC=CC=C1)C(C)C2=CC=C(CC(C)C)C=C2	Others	1	102.701	-4.919	2	0	0.638	1	-1.02019	FALSE	All properties and OPS components are within expected ranges.	12.7493	0.000548399	-3.75845	TRUE	All properties and OPS components are within expected ranges.	9.01221	0.450845	0	6.38207	TRUE	All properties and OPS components are within expected ranges.	10.3099	0.812076	4.481	37.491	4.481	297.391	0	3	7	2	2	0.117
SAHA; Suberoylanilide hydroxamic acid	149647-78-9	HY-10221	Launched	FDA	10mM	22	C14H20N2O3	1708	Anti-infection; Apoptosis; Autophagy; Cell Cycle/DNA Damage; Epigenetics	3.73326	Cancer; Infection	O=C(NC1=CC=CC=C1)CCCCCCC(NO)=O	Apoptosis; Autophagy; Filovirus; HDAC; HPV; Mitophagy	1	102.654	-1.555	4	0	-0.868	3	-6.07034	FALSE	All properties and OPS components are within expected ranges. Unknown FCFP_2 feature: 1666606459: [*]C(=[*])NO Unknown FCFP_2 feature: -548542844: [*]NO	11.8231	0.00430103	-5.41278	FALSE	All properties and OPS components are within expected ranges. Unknown FCFP_2 feature: 1666606459: [*]C(=[*])NO Unknown FCFP_2 feature: -548542844: [*]NO	10.4594	0.0299181	0	-4.79179	FALSE	All properties and OPS components are within expected ranges.	9.24572	0.991022	1.838	81.037	2.005	264.32	3	3	8	1	1	0.276
RU-0211; SPI-0211	136790-76-6	HY-B0679	Launched	FDA	10mM	66	C20H32F2O5	2173	Membrane Transporter/Ion Channel	3.50752	Metabolic Disease	O=C(C(F)(F)CCCC)CC[C@@H]([C@@H](C1)O)[C@H](C1=O)CCCCCCC(O)=O	Chloride Channel	1	102.511	-3.35	3	0	-0.45	2	-3.26811	FALSE	All properties and OPS components are within expected ranges.	10.981	0.0229298	-19.1371	FALSE	All properties and OPS components are within expected ranges.	9.44832	0.251401	0	1.99317	TRUE	All properties and OPS components are within expected ranges.	9.98346	0.90843	3.831	93.533	3.831	390.462	2	5	14	1	0	0.221
NSC 35459	5560-59-8	HY-B0500	Launched	Other Countries	10mM	50	C26H35NO7	2713	GPCR/G Protein; Neuronal Signaling	6.75782	Metabolic Disease	CCN(CCCC1=CC=CC=C1)CCCC2=CC=CC=C2.O=C(CC(C(O)=O)(O)CC(O)=O)O	5-HT Receptor	1	102.208	-5.333	2	0	1.459	0	5.06883	TRUE	All properties and OPS components are within expected ranges.	7.75406	0.845372	-6.40506	FALSE	All properties and OPS components are within expected ranges.	6.49745	0.99962	1	3.65961	TRUE	All properties and OPS components are within expected ranges.	8.02152	0.999986	5.39	3.352	5.39	281.435	0	1	9	2	2	0.009
Zucapsaicin; Civamide; cis-Capsaicin	25775-90-0	HY-B1583	Launched	Other Countries	10mM	199	C18H27NO3	2813	Anti-infection; Membrane Transporter/Ion Channel; Neuronal Signaling	13.519	Neurological Disease	CC(C)/C=C\CCCCC(NCC1=CC=C(O)C(OC)=C1)=O	HSV; TRP Channel	1	102.123	-3.411	3	0	0.107	1	-2.25007	FALSE	All properties and OPS components are within expected ranges.	15.3335	8.54e-07	-8.87003	FALSE	OPS PC11 out of range. Value: 5.0303. Training min, max, SD, explained variance: -4.0074, 4.0205, 1.463, 0.0267.	12.2296	6.18e-05	0	-6.58746	FALSE	All properties and OPS components are within expected ranges.	11.9526	0.105085	3.91	59.856	3.91	305.412	2	3	9	1	1	0.164
Benproperine phosphate	19428-14-9	HY-114657A	Launched	NMPA	10mM	15	C21H30NO5P	147	Cytoskeleton	11.9077	Cancer; Inflammation/Immunology	CC(N1CCCCC1)COC2=CC=CC=C2CC3=CC=CC=C3.O=P(O)(O)O	Arp2/3 Complex	1	102.103	-5.805	2	0	1.265	0	6.60824	TRUE	All properties and OPS components are within expected ranges.	9.3521	0.270921	-5.43402	FALSE	All properties and OPS components are within expected ranges.	8.80667	0.555436	0	6.37817	TRUE	All properties and OPS components are within expected ranges.	9.29822	0.989032	5.221	12.282	5.221	309.445	0	2	6	3	2	0.036
PA-824; (S)-PA 824	187235-37-6	HY-10844	Launched	FDA	10mM	7	C14H12F3N3O5	1755	Anti-infection	7.2873	Infection; Cancer	FC(F)(F)OC(C=C1)=CC=C1CO[C@@H]2COC3=NC([N+]([O-])=O)=CN3C2	Antibiotic; Bacterial	1	102.006	-5.363	2	0	-0.189	2	-3.83705	FALSE	All properties and OPS components are within expected ranges. Unknown FCFP_2 feature: -1410079687: [*]N([*])[c](:n:[*]):n:[*]	13.8352	3.99e-05	-7.71878	FALSE	All properties and OPS components are within expected ranges. Unknown FCFP_2 feature: -1029027238: [*]OC(F)(F)F	12.0291	0.000143541	0	1.83912	TRUE	All properties and OPS components are within expected ranges.	13.8944	0.000167416	4.301	86.222	4.301	359.257	0	6	6	3	2	0.274
FPL60278AR	86484-91-5	HY-U00205	Launched	Other Countries	10mM	120	C22H34Cl2N2O2	2848	GPCR/G Protein; Neuronal Signaling	10.0244	Cardiovascular Disease; Endocrinology; Cancer	[H]Cl.[H]Cl.OC1=CC=C(CCNCCCCCCNCCC2=CC=CC=C2)C=C1O	Adrenergic Receptor	1	101.885	-3.209	3	0	0.101	1	0.580852	TRUE	All properties and OPS components are within expected ranges.	10.6217	0.0435485	-3.06521	TRUE	All properties and OPS components are within expected ranges.	9.07319	0.420405	0	-1.77194	TRUE	All properties and OPS components are within expected ranges.	10.3832	0.784179	4.267	67.251	4.267	356.502	4	4	13	2	2	0.162
IPD 1151T	94055-76-2	HY-17002	Launched	NMPA	10mM	222	C23H33NO7S2	523	Immunology/Inflammation	18.5626	Inflammation/Immunology	C[S+](C)CCC(NC1=CC=C(C=C1)OCC(COCC)O)=O.CC2=CC=C(C=C2)S(=O)([O-])=O	Interleukin Related	1	101.878	-0.853	4	1	-0.97	3	-10.9831	FALSE	All properties and OPS components are within expected ranges. Unknown FCFP_2 feature: 136358998: [*][S+]([*])C Unknown FCFP_2 feature: -832645980: [*]C[S+](C)C	16.1321	1.04e-07	-7.31607	FALSE	All properties and OPS components are within expected ranges. Unknown FCFP_2 feature: -832645980: [*]C[S+](C)C	11.0131	0.00594398	0	-9.45768	FALSE	All properties and OPS components are within expected ranges. Unknown FCFP_2 feature: -832645980: [*]C[S+](C)C	11.6295	0.198958	0.882	68.786	1.472	328.447	2	4	10	1	1	0.197
Minaprine dihydrochloride	25953-17-7	HY-B0884A	Launched	FDA	10mM	12	C17H24Cl2N4O	2200	Neuronal Signaling	1.28422	Neurological Disease	[H]Cl.CC1=CC(C2=CC=CC=C2)=NN=C1NCCN3CCOCC3.[H]Cl	Monoamine Oxidase	1	101.602	-3.869	3	0	-0.036	2	-0.470887	FALSE	All properties and OPS components are within expected ranges.	13.802	4.33e-05	-2.18362	TRUE	All properties and OPS components are within expected ranges.	15.3374	3.7e-12	0	0.130418	TRUE	OPS PC33 out of range. Value: 3.8471. Training min, max, SD, explained variance: -3.3207, 3.6498, 1.007, 0.0084.	14.8622	1.42e-06	2.819	47.614	2.819	298.383	1	5	5	3	2	0.156
TDT 067 hydrochloride	78628-80-5	HY-17395	Launched	FDA; NMPA	10mM	36	C21H26ClN	573	Anti-infection	4.67606	Infection	CN(C/C([H])=C([H])/C#CC(C)(C)C)CC1=CC=CC2=CC=CC=C21.[H]Cl	Antibiotic; Bacterial; Fungal	1	101.596	-6.125	1	0	1.442	0	16.9053	TRUE	All properties and OPS components are within expected ranges.	8.86107	0.443684	-0.378023	TRUE	All properties and OPS components are within expected ranges.	11.3354	0.00202109	1	20.1962	TRUE	All properties and OPS components are within expected ranges.	10.1132	0.875586	5.335	3.352	5.335	291.43	0	1	6	2	2	0.009
Isoxsuprine hydrochloride	579-56-6	HY-B1270	Launched	FDA	10mM	228	C18H24ClNO3	2268	GPCR/G Protein; Membrane Transporter/Ion Channel; Neuronal Signaling	15.7157	Neurological Disease; Endocrinology	OC(C(NC(C)COC1=CC=CC=C1)C)C2=CC=C(O)C=C2.[H]Cl	Adrenergic Receptor; iGluR	1	101.233	-2.893	3	0	-0.229	2	1.07522	TRUE	All properties and OPS components are within expected ranges.	11.8473	0.00408606	-7.24992	FALSE	All properties and OPS components are within expected ranges.	10.0655	0.0779987	0	-17.2075	FALSE	All properties and OPS components are within expected ranges.	10.9582	0.508612	3.002	63.371	3.002	301.38	3	4	7	2	2	0.19
R-1929	1649-18-9	HY-B1470	Launched	Other Countries	10mM	2	C19H22FN3O	2809	GPCR/G Protein; Neuronal Signaling	0.494063	Neurological Disease	O=C(C1=CC=C(F)C=C1)CCCN2CCN(C3=NC=CC=C3)CC2	Dopamine Receptor	1	101.205	-4.153	2	0	0.329	1	11.8792	TRUE	All properties and OPS components are within expected ranges.	11.822	0.00431106	-0.917799	TRUE	All properties and OPS components are within expected ranges.	11.2408	0.00280219	0	18.0293	TRUE	All properties and OPS components are within expected ranges.	11.3009	0.335642	3.368	35.266	3.368	327.396	0	4	6	3	2	0.105
Indoramine; Wy 21901	26844-12-2	HY-12760	Launched	EMA	10mM	21	C22H25N3O	2488	GPCR/G Protein; Neuronal Signaling	4.8764	Endocrinology	O=C(NC1CCN(CCC2=CNC3=C2C=CC=C3)CC1)C4=CC=CC=C4	Adrenergic Receptor	1	101.185	-4.534	2	0	0.113	1	-0.827207	FALSE	All properties and OPS components are within expected ranges.	16.3429	5.93e-08	-1.52398	TRUE	OPS PC15 out of range. Value: 4.5165. Training min, max, SD, explained variance: -4.0077, 3.8442, 1.218, 0.0185.	13.107	1.07e-06	0	-19.1975	FALSE	All properties and OPS components are within expected ranges.	12.3528	0.0400501	3.347	48.518	3.347	347.453	2	2	5	4	3	0.134
HY-W009326	59227-89-3	HY-W009326	Launched	NMPA	10mM	8	C18H35NO	1672	Others	2.81845	Others	O=C1N(CCCCCCCCCCCC)CCCCC1	Others	1	101.177	-5.187	2	0	1.289	0	-3.71943	FALSE	All properties and OPS components are within expected ranges.	11.8954	0.00368933	-9.17608	FALSE	All properties and OPS components are within expected ranges.	8.47132	0.717718	1	-2.02549	TRUE	All properties and OPS components are within expected ranges.	10.5684	0.704618	5.725	20.653	5.725	281.477	0	1	11	1	0	0.058
RPX7009	1360457-46-0	HY-19930	Launched	EMA; FDA	10mM	9	C12H16BNO5S	679	Anti-infection	0.996785	Infection	O=C(O)C[C@@H]1CC[C@H](NC(CC2=CC=CS2)=O)B(O)O1	Bacterial; Beta-lactamase	1	100.989	-2.621	3	0	-1.096	3	-5.38808	FALSE	All properties and OPS components are within expected ranges.	10.6624	0.0406007	-1.68547	TRUE	All properties and OPS components are within expected ranges.	11.4415	0.00138663	0	-4.02305	FALSE	All properties and OPS components are within expected ranges.	12.1107	0.0734658	1.966	97.972	2.145	297.135	3	5	5	2	1	0.419
A4166; Senaglinide	105816-04-4	HY-B0422	Launched	EMA; FDA; NMPA	10mM	183	C19H27NO3	1093	Membrane Transporter/Ion Channel; Metabolic Enzyme/Protease	11.8761	Metabolic Disease	O=C(O)[C@@H](CC1=CC=CC=C1)NC([C@H]2CC[C@H](C(C)C)CC2)=O	Dipeptidyl Peptidase; Potassium Channel	1	100.859	-4.124	2	0	-0.003	2	-6.97857	FALSE	All properties and OPS components are within expected ranges.	9.50105	0.227496	-7.53782	FALSE	All properties and OPS components are within expected ranges.	8.40056	0.748397	0	9.26617	TRUE	All properties and OPS components are within expected ranges.	13.0362	0.00495288	3.981	68.227	3.981	317.423	2	3	6	2	1	0.194
BRL29060	61869-08-7	HY-122272	Launched	FDA; NMPA	10mM	16	C19H20FNO3	169	GPCR/G Protein; Neuronal Signaling	14.5137	Neurological Disease	FC1=CC=C(C=C1)[C@H]2[C@@H](CNCC2)COC3=CC=C4OCOC4=C3	Adrenergic Receptor; Serotonin Transporter	1	100.793	-4.712	2	0	0.218	1	16.7987	TRUE	All properties and OPS components are within expected ranges.	8.18574	0.707812	3.31318	TRUE	All properties and OPS components are within expected ranges.	10.0364	0.0831866	0	23.2222	TRUE	All properties and OPS components are within expected ranges.	8.81906	0.99858	3.229	39.6	3.229	329.365	1	4	4	4	2	0.126
SQ-11725	42200-33-9	HY-B0804	Launched	FDA	10mM	81	C17H27NO4	2192	GPCR/G Protein; Neuronal Signaling	8.75201	Cardiovascular Disease	OC1CC2=C(C(OCC(O)CNC(C)(C)C)=CC=C2)CC1O	Adrenergic Receptor	1	100.356	-1.447	4	0	-1.132	3	-2.28653	FALSE	All properties and OPS components are within expected ranges.	11.1319	0.0172715	-12.9442	FALSE	All properties and OPS components are within expected ranges.	8.89909	0.508276	0	-13.8746	FALSE	All properties and OPS components are within expected ranges.	8.15531	0.999965	1.146	84.186	1.146	309.401	4	5	6	2	1	0.238
Piribedil	622744	HY-12707	Launched	NMPA	10mM	55	C16H18N4O2	187	Epigenetics; GPCR/G Protein; Neuronal Signaling	4.61272	Cancer; Endocrinology; Neurological Disease	C1(N2CCN(CC3=CC=C(OCO4)C4=C3)CC2)=NC=CC=N1	Adrenergic Receptor; Dopamine Receptor; Histone Methyltransferase	1	100.213	-3.47	3	0	-0.268	2	-2.39063	FALSE	All properties and OPS components are within expected ranges. Unknown FCFP_2 feature: -1410079687: [*]N([*])[c](:n:[*]):n:[*]	13.1077	0.000235669	-1.8829	TRUE	All properties and OPS components are within expected ranges.	11.3392	0.00199381	0	2.83471	TRUE	All properties and OPS components are within expected ranges.	12.0392	0.0866992	2.043	47.087	2.043	298.34	0	6	3	4	2	0.167
UK 68789	115256-11-6	HY-B0232	Launched	EMA; FDA	10mM	217	C19H27N3O5S2	951	Membrane Transporter/Ion Channel	15.3857	Cardiovascular Disease	CS(=O)(NC1=CC=C(CCN(C)CCOC2=CC=C(NS(=O)(C)=O)C=C2)C=C1)=O	Potassium Channel	1	99.9571	-2.621	3	0	-1.33	3	-34.7021	FALSE	All properties and OPS components are within expected ranges.	9.11771	0.348392	-0.327732	TRUE	All properties and OPS components are within expected ranges.	11.1581	0.0037031	0	-13.9585	FALSE	All properties and OPS components are within expected ranges.	10.5967	0.691435	1.679	107.106	1.679	441.565	2	6	11	2	2	0.27
HCQ (sulfate)	747-36-4	HY-B1370	Launched	FDA; NMPA	10mM	99	C18H28ClN3O5S	1423	Anti-infection; Autophagy; Immunology/Inflammation	10.0925	Cancer; Infection	CCN(CCO)CCCC(NC1=CC=NC2=CC(Cl)=CC=C12)C.O=S(O)(O)=O	Autophagy; Parasite; SARS-CoV; Toll-like Receptor (TLR)	1	99.9386	-3.833	3	0	0.151	1	8.83787	TRUE	All properties and OPS components are within expected ranges.	10.0385	0.110529	-1.5684	TRUE	All properties and OPS components are within expected ranges.	14.0918	5.95e-09	0	-2.84164	FALSE	OPS PC24 out of range. Value: -3.682. Training min, max, SD, explained variance: -3.3171, 3.4805, 1.198, 0.0118.	11.917	0.113429	3.457	48.239	3.457	335.872	2	4	9	2	2	0.131
KAD-1229 (anhydrous); S21403 (anhydrous)	145525-41-3	HY-17398	Launched	NMPA	10mM	14	C19H24NO3.1/2Ca	576	Membrane Transporter/Ion Channel	2.7202	Metabolic Disease	O=C([O-])[C@H](CC(N1C[C@](CCCC2)([H])[C@]2([H])C1)=O)CC3=CC=CC=C3.[0.5Ca2+]	Potassium Channel	1	99.8325	-2.805	3	0	-0.552	3	-6.43921	FALSE	OPS PC8 out of range. Value: 4.9272. Training min, max, SD, explained variance: -4.2516, 4.6021, 1.692, 0.0374. Unknown FCFP_2 feature: -367494947: [*]C([*])C(=O)[O-] Unknown FCFP_2 feature: 260714409: [*]C(=[*])[O-]	12.1981	0.001913	-10.1328	FALSE	All properties and OPS components are within expected ranges.	8.84072	0.538085	0	1.86901	TRUE	All properties and OPS components are within expected ranges.	10.5455	0.715119	1.542	55.254	1.542	314.399	0	3	5	3	1	0.184
Tiprolisant	362665-56-3	HY-12199	Launched	EMA; FDA	10mM	7	C17H26ClNO	165	GPCR/G Protein; Immunology/Inflammation; Neuronal Signaling	2.77116	Neurological Disease; Endocrinology	ClC1=CC=C(CCCOCCCN2CCCCC2)C=C1	Histamine Receptor	1	99.6217	-4.324	2	0	0.948	0	7.15569	TRUE	All properties and OPS components are within expected ranges.	8.72634	0.496604	-9.9945	FALSE	All properties and OPS components are within expected ranges.	9.28262	0.321255	0	7.23105	TRUE	All properties and OPS components are within expected ranges.	10.4305	0.765093	4.194	12.282	4.194	295.847	0	2	8	2	1	0.038
Ciproxidine; BF 2649	903576-44-3	HY-12199B	Launched	EMA; FDA	10mM	7	C17H27Cl2NO	166	GPCR/G Protein; Immunology/Inflammation; Neuronal Signaling	2.77116	Neurological Disease; Endocrinology	ClC(C=C1)=CC=C1CCCOCCCN2CCCCC2.Cl	Histamine Receptor	1	99.6217	-4.324	2	0	0.948	0	7.15569	TRUE	All properties and OPS components are within expected ranges.	8.72634	0.496604	-9.9945	FALSE	All properties and OPS components are within expected ranges.	9.28262	0.321255	0	7.23105	TRUE	All properties and OPS components are within expected ranges.	10.4305	0.765093	4.194	12.282	4.194	295.847	0	2	8	2	1	0.038
Piperazine estrone sulfate; Estrone sulfate piperazine salt	7280-37-7	HY-B1361	Launched	FDA	10mM	80	C22H32N2O5S	2293	Vitamin D Related/Nuclear Receptor	8.77162	Endocrinology	C[C@]1([C@](CC2)([H])[C@]3([H])CCC4=C(C=CC(OS(=O)(O)=O)=C4)[C@@]3([H])CC1)C2=O.N5CCNCC5	Estrogen Receptor/ERR	1	99.5972	-5.018	2	0	-0.35	2	-5.48035	FALSE	All properties and OPS components are within expected ranges. Unknown FCFP_2 feature: -1533214669: [*]OS(=O)(=O)O	15.5152	5.3e-07	-5.44722	FALSE	All properties and OPS components are within expected ranges. Unknown FCFP_2 feature: -1533214669: [*]OS(=O)(=O)O	10.9831	0.00654005	0	9.65466	TRUE	All properties and OPS components are within expected ranges.	10.7463	0.618265	3.545	81.648	3.545	350.429	1	5	2	4	1	0.279
Bay H-4502	60628-96-8	HY-B0301	Launched	NMPA	10mM	36	C22H18N2	1003	Anti-infection	11.8477	Infection	N1(C(C2=CC=C(C3=CC=CC=C3)C=C2)C4=CC=CC=C4)C=CN=C1	Antibiotic; Fungal	1	99.4582	-5.733	2	0	1.016	0	3.04418	TRUE	All properties and OPS components are within expected ranges. Unknown FCFP_2 feature: -929304517: [*]:n(:[*])C([c](:[*]):[*])[c](:[*]):[*]	8.11921	0.731659	-1.17692	TRUE	All properties and OPS components are within expected ranges. Unknown FCFP_2 feature: -929304517: [*]:n(:[*])C([c](:[*]):[*])[c](:[*]):[*]	9.08768	0.413252	0	5.75739	TRUE	All properties and OPS components are within expected ranges. Unknown FCFP_2 feature: -929304517: [*]:n(:[*])C([c](:[*]):[*])[c](:[*]):[*]	9.31926	0.988135	4.637	16.609	4.637	310.392	0	1	4	4	4	0.055
Phenoxybenzamine hydrochloride	63-92-3	HY-B0431A	Launched	FDA; NMPA	10mM	73	C18H23Cl2NO	1101	GPCR/G Protein; Neuronal Signaling	15.6649	Cancer; Endocrinology; Cardiovascular Disease	CC(COC1=CC=CC=C1)N(CCCl)CC2=CC=CC=C2.Cl	Adrenergic Receptor	1	99.003	-4.831	2	0	1.067	0	0.272143	TRUE	All properties and OPS components are within expected ranges. Unknown FCFP_2 feature: -1208154531: [*]CCCl	20.795	4.45e-13	-6.59367	FALSE	All properties and OPS components are within expected ranges.	9.913	0.108169	0	2.15557	TRUE	All properties and OPS components are within expected ranges.	11.2183	0.375419	4.578	12.282	4.578	303.826	0	2	8	2	2	0.038
Promestriene	39219-28-8	HY-108293	Launched	NMPA	10mM	38	C22H32O2	114	Vitamin D Related/Nuclear Receptor	1.60028	Cancer; Endocrinology	C[C@@]12[C@@H](OC)CC[C@@]1([H])[C@]3([H])CCC4=C(C=CC(OCCC)=C4)[C@@]3([H])CC2	Estrogen Receptor/ERR	1	98.9701	-6.55	1	0	1.215	0	-1.42881	FALSE	OPS PC5 out of range. Value: -3.862. Training min, max, SD, explained variance: -3.7579, 4.4942, 2.102, 0.0577.	15.5446	4.91e-07	-6.92815	FALSE	All properties and OPS components are within expected ranges.	11.4159	0.00152018	0	12.629	TRUE	All properties and OPS components are within expected ranges.	9.8317	0.938324	5.344	17.86	5.344	328.488	0	2	4	4	1	0.052
DU-23000 (maleate)	61718-82-9	HY-B0103A	Launched	FDA; NMPA	10mM	238	C19H25F3N2O6	845	Neuronal Signaling	17.8748	Neurological Disease; Cancer	O=C(O)/C=C\C(O)=O.FC(C1=CC=C(/C(CCCCOC)=N/OCCN)C=C1)(F)F	Serotonin Transporter	1	98.9136	-3.829	3	0	-0.19	2	15.9438	TRUE	All properties and OPS components are within expected ranges.	9.79728	0.155478	-9.96945	FALSE	All properties and OPS components are within expected ranges.	13.509	1.39e-07	0	-11.1903	FALSE	All properties and OPS components are within expected ranges.	11.9533	0.104935	2.738	55.723	2.551	318.335	1	4	10	1	1	0.165
6-Hydroxyhyoscyamine	55869-99-3	HY-N0584	Launched	NMPA	10mM	210	C17H23NO4	1609	GPCR/G Protein; Neuronal Signaling	10.9072	Neurological Disease	CN1[C@H]2[C@@H](O)C[C@@H]1C[C@H](OC([C@@H](C3=CC=CC=C3)CO)=O)C2	mAChR	1	98.7668	-1.374	4	0	-1.086	3	-5.36169	FALSE	All properties and OPS components are within expected ranges.	9.94617	0.126359	-15.2169	FALSE	All properties and OPS components are within expected ranges.	8.29587	0.790582	0	-20.1323	FALSE	All properties and OPS components are within expected ranges.	9.58987	0.969842	0.63	71.214	0.63	305.369	2	5	5	3	1	0.227
Racanisodamine	17659-49-3	HY-N2064	Launched	NMPA	10mM	210	C17H23NO4	1645	GPCR/G Protein; Neuronal Signaling	10.9072	Neurological Disease	O=C(OC1CC(N2C)CC(O)C2C1)C(CO)C3=CC=CC=C3	mAChR	1	98.7668	-1.374	4	0	-1.086	3	-5.36169	FALSE	All properties and OPS components are within expected ranges.	9.94617	0.126359	-15.2169	FALSE	All properties and OPS components are within expected ranges.	8.29587	0.790582	0	-20.1323	FALSE	All properties and OPS components are within expected ranges.	9.58987	0.969842	0.63	71.214	0.63	305.369	2	5	5	3	1	0.227
Estrone sulfate potassium	1240-04-6	HY-113293A	Launched	FDA	10mM	37	C18H21KO5S	1784	Metabolic Enzyme/Protease	6.08469	Endocrinology; Cancer	C[C@]1([C@](CC2)([H])[C@]3([H])CCC4=C(C=CC(OS(=O)([O-])=O)=C4)[C@@]3([H])CC1)C2=O.[K+]	Endogenous Metabolite	1	98.7407	-4.702	2	0	-0.512	2	-7.23812	FALSE	All properties and OPS components are within expected ranges. Unknown FCFP_2 feature: 85419001: [*]OS(=O)(=O)[O-] Unknown FCFP_2 feature: 260714409: [*]C(=[*])[O-]	17.7238	1.49e-09	-4.41013	FALSE	All properties and OPS components are within expected ranges. Unknown FCFP_2 feature: 85419001: [*]OS(=O)(=O)[O-]	11.2864	0.00239584	0	8.28156	TRUE	All properties and OPS components are within expected ranges. Unknown FCFP_2 feature: 85419001: [*]OS(=O)(=O)[O-]	11.2028	0.383062	2.842	78.133	1.301	349.421	0	5	2	4	1	0.285
Palmityl alcohol	36653-82-4	HY-B1465	Launched	FDA	10mM	164	C16H34O	2311	Metabolic Enzyme/Protease	12.294	Others	CCCCCCCCCCCCCCCCO	Endogenous Metabolite	1	98.5937	-4.567	2	0	1.509	0	1.11702	TRUE	All properties and OPS components are within expected ranges.	13.7102	5.44e-05	-13.9569	FALSE	All properties and OPS components are within expected ranges.	6.40412	0.999776	1	1.03708	TRUE	All properties and OPS components are within expected ranges.	9.9506	0.915653	6.445	20.815	6.445	242.441	1	1	14	0	0	0.064
Dyclocaine hydrochloride	536-43-6	HY-B0364A	Launched	FDA; NMPA	10mM	25	C18H28ClNO2	1053	Anti-infection; Metabolic Enzyme/Protease	10.5957	Cancer; Infection	O=C(C1=CC=C(OCCCC)C=C1)CCN2CCCCC2.Cl	Aldehyde Dehydrogenase (ALDH); Bacterial; Fungal	1	98.3889	-4.319	2	0	0.631	1	2.61545	TRUE	All properties and OPS components are within expected ranges.	12.331	0.00142404	-7.48768	FALSE	All properties and OPS components are within expected ranges.	9.29425	0.316073	0	5.35352	TRUE	All properties and OPS components are within expected ranges.	11.853	0.129661	4.053	29.583	4.053	289.412	0	3	8	2	1	0.089
Hexythiazox	78587-05-0	HY-B1851	Launched	FDA	10mM	57	C17H21ClN2O2S	2367	Anti-infection	11.4214	Infection	O=C(N1C(S[C@H](C2=CC=C(Cl)C=C2)[C@H]1C)=O)NC3CCCCC3	Parasite	1	98.3377	-6.458	1	0	0.717	0	3.33609	TRUE	All properties and OPS components are within expected ranges.	12.4202	0.00116553	-2.79584	TRUE	All properties and OPS components are within expected ranges.	10.6919	0.015758	0	4.57123	TRUE	All properties and OPS components are within expected ranges.	10.9917	0.49111	5.416	50.764	4.892	352.879	1	3	2	3	1	0.22
SDX-105	3543-75-7	HY-B0077	Launched	FDA; NMPA	10mM	24	C16H22Cl3N3O2	833	Apoptosis; Cell Cycle/DNA Damage	2.62385	Cancer	CN1C(C=CC(N(CCCl)CCCl)=C2)=C2N=C1CCCC(O)=O.Cl	Apoptosis; DNA Alkylator/Crosslinker	1	98.3245	-4.019	2	0	0.042	1	-5.81471	FALSE	All properties and OPS components are within expected ranges. Unknown FCFP_2 feature: -1208154531: [*]CCCl	24.9429	1.38e-17	-0.540707	TRUE	All properties and OPS components are within expected ranges.	12.6151	1.12e-05	0	9.3069	TRUE	All properties and OPS components are within expected ranges.	13.0572	0.00460543	3.606	58.078	3.606	358.263	1	4	9	2	2	0.159
Lucanthone	479-50-5	HY-B2098	Launched	FDA	10mM	15	C20H24N2OS	2374	Anti-infection; Autophagy	4.98934	Cancer	O=C1C2=C(SC3=C1C=CC=C3)C(C)=CC=C2NCCN(CC)CC	Autophagy; Parasite	1	97.952	-5.55	2	0	0.755	0	2.06733	TRUE	All properties and OPS components are within expected ranges.	14.5781	6.07e-06	8.49269	TRUE	OPS PC23 out of range. Value: 2.8829. Training min, max, SD, explained variance: -4.97, 2.7339, 0.967, 0.0117.	10.5483	0.0235664	0	7.27579	TRUE	All properties and OPS components are within expected ranges.	11.8917	0.119666	4.653	33.463	4.653	340.482	1	4	6	3	2	0.158
Sch 1000	22254-24-6	HY-B0241	Launched	FDA; NMPA	10mM	156	C20H30BrNO3	953	GPCR/G Protein; Neuronal Signaling	16.9333	Inflammation/Immunology; Neurological Disease	C[N+]1([C@H]2CC[C@H]1CC(OC(C(CO)C3=CC=CC=C3)=O)C2)C(C)C.[Br-]	mAChR	1	97.517	-1.988	4	0	-0.561	3	-3.35619	FALSE	All properties and OPS components are within expected ranges. Unknown FCFP_2 feature: -2076001612: [*]CC1C[*][*][N+]1([*])[*] Unknown FCFP_2 feature: 609127571: [*]C([*])[N+]1(C)C([*])[*][*]C1[*] Unknown FCFP_2 feature: 136358998: [*][S+]([*])C	11.4749	0.00882111	-11.99	FALSE	All properties and OPS components are within expected ranges.	7.34488	0.982935	0	-26.4578	FALSE	All properties and OPS components are within expected ranges.	9.03753	0.996165	1.092	47.046	1.092	332.457	1	3	6	3	1	0.128
YM178	223673-61-8	HY-14773	Launched	EMA; FDA; NMPA	10mM	113	C21H24N4O2S	386	GPCR/G Protein; Neuronal Signaling	9.38173	Neurological Disease; Endocrinology	O=C(NC1=CC=C(CCNC[C@H](O)C2=CC=CC=C2)C=C1)CC3=CSC(N)=N3	Adrenergic Receptor	1	97.4364	-3.296	3	0	-1.002	3	-6.5733	FALSE	All properties and OPS components are within expected ranges.	16.9044	1.33e-08	-6.54385	FALSE	All properties and OPS components are within expected ranges.	12.996	1.85e-06	0	-10.7521	FALSE	OPS PC16 out of range. Value: 4.8791. Training min, max, SD, explained variance: -4.8145, 4.584, 1.413, 0.0165.	14.2639	3.04e-05	2.453	101.537	2.26	396.506	4	5	9	3	3	0.316
DU21220 (hydrochloride)	23239-51-2	HY-B0452	Launched	FDA; NMPA	10mM	97	C17H22ClNO3	1119	GPCR/G Protein; Neuronal Signaling	14.6606	Endocrinology	OC1=CC=C(CCN[C@H](C)[C@@H](O)C2=CC=C(O)C=C2)C=C1.Cl	Adrenergic Receptor	1	97.273	-2.267	3	0	-0.524	3	0.895923	TRUE	All properties and OPS components are within expected ranges.	11.9111	0.00356773	-4.74926	FALSE	All properties and OPS components are within expected ranges.	7.72084	0.944081	0	-19.0315	FALSE	All properties and OPS components are within expected ranges.	7.91377	0.999993	2.655	75.256	2.655	287.354	4	4	6	2	2	0.239
Avobenzone	70356-09-1	HY-B0316	Launched	FDA	10mM	21	C20H22O3	2106	Apoptosis; Vitamin D Related/Nuclear Receptor	5.60776	Others	O=C(C1=CC=C(C(C)(C)C)C=C1)CC(C2=CC=C(OC)C=C2)=O	Apoptosis; Estrogen Receptor/ERR	1	97.1227	-5.232	2	0	0.56	1	0.764698	TRUE	All properties and OPS components are within expected ranges.	10.6238	0.0433923	-2.22457	TRUE	All properties and OPS components are within expected ranges.	8.9309	0.492054	0	7.40706	TRUE	All properties and OPS components are within expected ranges.	7.99991	0.999988	4.538	43.531	4.538	310.387	0	3	6	2	2	0.122
Octyl methoxycinnamate	5466-77-3	HY-B1234	Launched	FDA	10mM	52	C18H26O3	2264	Others	6.97971	Others	O=C(OCC(CC)CCCC)/C=C/C1=CC=C(OC)C=C1	Others	1	96.7303	-4.938	2	0	0.882	0	-3.96532	FALSE	All properties and OPS components are within expected ranges.	14.6182	5.48e-06	-8.36023	FALSE	All properties and OPS components are within expected ranges.	10.2241	0.0540756	0	4.96419	TRUE	All properties and OPS components are within expected ranges.	13.0174	0.00528549	5.153	35.16	5.153	290.397	0	3	10	1	1	0.104
CB-7598	154229-19-3	HY-70013	Launched	EMA; FDA	2mM	7	C24H31NO	709	Metabolic Enzyme/Protease	2.98245	Cancer	C[C@@]12C(C3=CN=CC=C3)=CC[C@]1([C@@]4(CC=C5[C@@](C)([C@]4(CC2)[H])CC[C@@H](C5)O)[H])[H]	Cytochrome P450	1	96.6956	-5.597	2	0	0.644	1	-2.67194	FALSE	All properties and OPS components are within expected ranges.	15.2047	1.2e-06	-3.04642	TRUE	All properties and OPS components are within expected ranges.	11.645	0.000654377	0	2.82148	TRUE	All properties and OPS components are within expected ranges.	10.6179	0.68143	4.223	32.076	4.223	349.509	1	2	1	5	1	0.091
Ro 14-4767/002	78613-38-4	HY-B0238	Launched	NMPA	10mM	128	C21H36ClNO	952	Anti-infection	16.5864	Infection	C[C@@H]1O[C@H](C)CN(CC(C)CC2=CC=C(C(C)(C)CC)C=C2)C1.Cl	Antibiotic; Fungal	1	96.68	-5.892	2	0	1.29	0	2.79329	TRUE	All properties and OPS components are within expected ranges.	14.8954	2.68e-06	-3.05515	TRUE	All properties and OPS components are within expected ranges.	8.74162	0.588373	0	4.37118	TRUE	All properties and OPS components are within expected ranges.	11.4724	0.259521	5.299	12.282	5.299	317.509	0	2	6	2	1	0.031
Tegaserod	145158-71-0	HY-14153	Launched	FDA	10mM	137	C16H23N5O	1883	Apoptosis; GPCR/G Protein; Neuronal Signaling	15.6429	Cancer; Metabolic Disease	COC1=CC=C(NC=C2/C=N/NC(NCCCCC)=N)C2=C1	5-HT Receptor; Apoptosis	1	96.5782	-3.861	3	0	-0.516	2	15.4415	TRUE	All properties and OPS components are within expected ranges.	9.75059	0.165566	-5.176	FALSE	All properties and OPS components are within expected ranges.	12.7932	4.89e-06	0	-2.76395	FALSE	All properties and OPS components are within expected ranges.	15.1738	2.52e-07	3.131	84.016	3.131	301.387	4	3	9	2	2	0.252
SDZ-HTF-919; HTF-919	189188-57-6	HY-14153A	Launched	FDA	10mM	137	C20H27N5O5	1884	Apoptosis; GPCR/G Protein; Neuronal Signaling	15.6429	Metabolic Disease; Neurological Disease	O=C(O)/C=C\C(O)=O.COC1=CC=C(NC=C2/C=N/NC(NCCCCC)=N)C2=C1	5-HT Receptor; Apoptosis	1	96.5782	-3.861	3	0	-0.516	2	15.4415	TRUE	All properties and OPS components are within expected ranges.	9.75059	0.165566	-5.176	FALSE	All properties and OPS components are within expected ranges.	12.7932	4.89e-06	0	-2.76395	FALSE	All properties and OPS components are within expected ranges.	15.1738	2.52e-07	3.131	84.016	3.131	301.387	4	3	9	2	2	0.252
NO050328 hydrochloride; NO328 hydrochloride; TGB hydrochloride	145821-59-6	HY-B0696A	Launched	FDA	10mM	35	C20H26ClNO2S2	2175	Membrane Transporter/Ion Channel; Neuronal Signaling	7.70103	Neurological Disease	O=C([C@H]1CN(CC/C=C(C2=C(C)C=CS2)/C3=C(C)C=CS3)CCC1)O.[H]Cl	GABA Receptor	1	96.2319	-5.329	2	0	0.683	1	-2.4674	FALSE	All properties and OPS components are within expected ranges.	16.6209	2.83e-08	-19.5461	FALSE	All properties and OPS components are within expected ranges.	10.1931	0.0582056	0	17.4436	TRUE	All properties and OPS components are within expected ranges.	12.5571	0.0227192	4.832	41.468	2.252	375.548	1	3	6	3	2	0.247
CB-1348; WR-139013	305-03-3	HY-13593	Launched	FDA	10mM	220	C14H19Cl2NO2	1861	Cell Cycle/DNA Damage	16.8652	Cancer	O=C(O)CCCC1=CC=C(N(CCCl)CCCl)C=C1	DNA Alkylator/Crosslinker	1	96.0102	-3.556	3	0	0.395	1	-3.49159	FALSE	All properties and OPS components are within expected ranges. Unknown FCFP_2 feature: -1208154531: [*]CCCl	24.0175	1.3e-16	-0.130331	TRUE	All properties and OPS components are within expected ranges.	10.7661	0.0126944	0	16.5633	TRUE	All properties and OPS components are within expected ranges.	10.2031	0.848606	3.899	41.468	3.899	304.212	1	3	9	1	1	0.13
CM346	173352-21-1	HY-14895	Launched	Other Countries	10mM	8	C15H21N3O2S	2640	Others	7.77491	Neurological Disease	CCOC1=CC=C2C(N=C(SCCN3CCOCC3)N2)=C1	Others	1	95.9189	-3.889	3	0	-0.106	2	-3.77493	FALSE	All properties and OPS components are within expected ranges. Unknown FCFP_2 feature: -1410020105: [*]S[c]1:[nH]:[*]:[*]:n:1	13.4944	9.25e-05	-6.27571	FALSE	All properties and OPS components are within expected ranges. Unknown FCFP_2 feature: -1410020105: [*]S[c]1:[nH]:[*]:[*]:n:1	11.3234	0.0021075	0	-0.429357	TRUE	All properties and OPS components are within expected ranges. Unknown FCFP_2 feature: -1410020105: [*]S[c]1:[nH]:[*]:[*]:n:1	11.962	0.102953	2.587	47.528	2.587	307.411	1	5	6	3	2	0.234
CM346 hydrochloride	173352-39-1	HY-14895A	Launched	Other Countries	10mM	8	C15H22ClN3O2S	2641	Others	7.77491	Neurological Disease	CCOC1=CC=C2C(N=C(SCCN3CCOCC3)N2)=C1.Cl	Others	1	95.9189	-3.889	3	0	-0.106	2	-3.77493	FALSE	All properties and OPS components are within expected ranges. Unknown FCFP_2 feature: -1410020105: [*]S[c]1:[nH]:[*]:[*]:n:1	13.4944	9.25e-05	-6.27571	FALSE	All properties and OPS components are within expected ranges. Unknown FCFP_2 feature: -1410020105: [*]S[c]1:[nH]:[*]:[*]:n:1	11.3234	0.0021075	0	-0.429357	TRUE	All properties and OPS components are within expected ranges. Unknown FCFP_2 feature: -1410020105: [*]S[c]1:[nH]:[*]:[*]:n:1	11.962	0.102953	2.587	47.528	2.587	307.411	1	5	6	3	2	0.234
Flurbiprofen axetil	91503-79-6	HY-101481	Launched	NMPA	10mM	59	C19H19FO4	23	Immunology/Inflammation	8.40843	Inflammation/Immunology	O=C(OC(OC(C)=O)C)C(C)C1=CC=C(C2=CC=CC=C2)C(F)=C1	COX	1	95.7585	-4.566	2	0	0.223	1	-0.873141	FALSE	All properties and OPS components are within expected ranges.	10.7404	0.0354252	-1.40711	TRUE	All properties and OPS components are within expected ranges.	6.62057	0.999264	0	10.5095	TRUE	All properties and OPS components are within expected ranges.	17.6222	1.64e-14	3.906	52.461	3.906	330.35	0	4	7	2	2	0.152
AHU-377	149709-62-6	HY-15407	Launched	EMA; FDA	10mM	176	C24H29NO5	457	Metabolic Enzyme/Protease	9.07149	Infection; Cardiovascular Disease	O=C(CCC(O)=O)N[C@H](CC1=CC=C(C2=CC=CC=C2)C=C1)C[C@@H](C)C(OCC)=O	Neprilysin	1	95.6807	-3.666	3	0	-0.487	2	-3.91307	FALSE	All properties and OPS components are within expected ranges.	12.2981	0.0015326	-4.91355	FALSE	All properties and OPS components are within expected ranges.	10.5664	0.0224296	0	5.3691	TRUE	All properties and OPS components are within expected ranges.	11.8901	0.12005	3.758	94.458	3.758	411.491	2	5	12	2	2	0.21
Naftifine hydrochloride	65473-14-5	HY-B0518A	Launched	FDA	10mM	100	C21H22ClN	2144	Anti-infection	18.5244	Infection	CN(C/C=C/C1=CC=CC=C1)CC2=CC=CC3=CC=CC=C23.Cl	Antibiotic; Fungal	1	95.4914	-5.879	2	0	1.296	0	6.82702	TRUE	All properties and OPS components are within expected ranges.	12.7293	0.000574479	-4.05304	TRUE	All properties and OPS components are within expected ranges.	12.4148	2.76e-05	1	15.3636	TRUE	All properties and OPS components are within expected ranges.	11.4784	0.257038	4.863	3.352	4.863	287.398	0	1	5	3	3	0.01
(E)-Capsaicin	404-86-4	HY-10448	Launched	EMA; FDA; NMPA	10mM	180	C18H27NO3	72	Apoptosis; Autophagy; Membrane Transporter/Ion Channel; Metabolic Enzyme/Protease; Neuronal Signaling	11.5496	Cancer	CC(C)/C=C/CCCCC(NCC1=CC=C(O)C(OC)=C1)=O	Apoptosis; Autophagy; Endogenous Metabolite; TRP Channel	1	95.0773	-3.411	3	0	0.107	1	-2.25007	FALSE	All properties and OPS components are within expected ranges.	15.3335	8.54e-07	-8.87003	FALSE	OPS PC11 out of range. Value: 5.0303. Training min, max, SD, explained variance: -4.0074, 4.0205, 1.463, 0.0267.	12.2296	6.18e-05	0	-6.58746	FALSE	All properties and OPS components are within expected ranges.	11.9526	0.105085	3.91	59.856	3.91	305.412	2	3	9	1	1	0.164
Capsaicin	404-86-4	HY-10448A	Launched	EMA; FDA	10mM	180	C18H27NO3	73	Apoptosis; Autophagy; Membrane Transporter/Ion Channel; Metabolic Enzyme/Protease; Neuronal Signaling	11.5496	Cancer; Inflammation/Immunology; Neurological Disease	CC(C)/C=C/CCCCC(NCC1=CC=C(O)C(OC)=C1)=O	Apoptosis; Autophagy; Endogenous Metabolite; TRP Channel	1	95.0773	-3.411	3	0	0.107	1	-2.25007	FALSE	All properties and OPS components are within expected ranges.	15.3335	8.54e-07	-8.87003	FALSE	OPS PC11 out of range. Value: 5.0303. Training min, max, SD, explained variance: -4.0074, 4.0205, 1.463, 0.0267.	12.2296	6.18e-05	0	-6.58746	FALSE	All properties and OPS components are within expected ranges.	11.9526	0.105085	3.91	59.856	3.91	305.412	2	3	9	1	1	0.164
PNU-100766	165800-03-3	HY-10394	Launched	FDA; NMPA	10mM	42	C16H20FN3O4	68	Anti-infection	0.90567	Infection	O=C(O[C@H]1CNC(C)=O)N(C1)C2=CC(F)=C(N3CCOCC3)C=C2	Antibiotic; Bacterial	1	95.0646	-2.478	3	0	-1.017	3	-29.8087	FALSE	All properties and OPS components are within expected ranges.	9.01264	0.386295	-2.98888	TRUE	All properties and OPS components are within expected ranges.	11.3144	0.0021743	0	-23.8286	FALSE	All properties and OPS components are within expected ranges.	12.047	0.0851624	0.894	71.976	0.894	337.346	1	5	4	3	1	0.209

## Sheet: ADMET
Name	CAS	catalog-No	Compound type	Molecular formula	LiDock score	ADMET_Sloubility	ADMET_Sloubility_level	ADMET_Sloubility	ADMET_Sloubility_level	ADMET_EXT_CYP2D6	ADMET_EXT_CYP2D6_Prediction	ADMET_EXT_CYP2D6_Applicability	ADMET_EXT_CYP2D6_Applicability_MD	ADMET_EXT_CYP2D6_Applicability_MDpvalue	ADMET_EXT_Hepatotoxic	ADMET_EXT_Hepatotoxic_prediction	ADMET_EXT_Hepatotoxic_Applicability	ADMET_EXT_Hepatotoxic_Applicability_MD	ADMET_EXT_Hepatotoxic_Applicability_MDpvaluue	ADMET_Absorption_Level	ADMET_EXT_PPB	ADMET_EXT_PPB_Prediction	ADMET_EXT_PPB_Applicability	ADMET_EXT_PPB_Applicability_MD	ADMET_EXT_PPB_Applicability_MDpvalue	ADMET_AlogP98		AlogP	Molecular weight	Num_H_Donors	Num_H_Acceptors	Num_RotatableBonds	Num_Rings	Num_AromaticRings	Molecular_FractionalPolarSurfaceArea
DA-3177	51598-60-8	HY-U00106	Other Countries	C21H28BrNO4	108.24	-1.649	4	-0.95	3	-4.28573	False.1	All properties and OPS components are within expected ranges._x005f_x000D_ Unknown FCFP_2 feature: 609127571: [*]C([*])[N+]1(C)C([*])[*][*]C1[*]_x005f_x000D_ Unknown FCFP_2 feature: 136358998: [*][S+]([*])C_x005f_x000D_ Unknown FCFP_2 feature: -2076001612: [*]CC1C[*][*][N+]1([*])[*]	11.9037	0.00362449	-12.1375	False.2	All properties and OPS components are within expected ranges.	8.49551	0.706866	0.3	-29.1226	False.4	All properties and OPS components are within expected ranges..1	9.73206	0.953467	0.289	55.976	0.289.1	358.451	1.1	4.1	7.1	5	1.2	Z
GR33343X	89365-50-4	HY-14302	EMA; FDA; NMPA	C25H37NO4	114.496	-2.479	3	-0.172	2	1.95043	TRUE	All properties and OPS components are within expected ranges.	13.625	6.71e-05	-17.2028	FALSE	All properties and OPS components are within expected ranges.	10.2892	0.0461684	0	20.5042	TRUE	All properties and OPS components are within expected ranges.	11.0986	0.43569	4.251	84.186	4.251	415.566	4	5	16	2	2	0.178
GR 33343X xinafoate	94749-08-3	HY-17453	EMA; FDA; NMPA	C36H45NO7	114.496	-2.479	3	-0.172	2	1.95043	TRUE	All properties and OPS components are within expected ranges.	13.625	6.71e-05	-17.2028	FALSE	All properties and OPS components are within expected ranges.	10.2892	0.0461684	0	20.5042	TRUE	All properties and OPS components are within expected ranges.	11.0986	0.43569	4.251	84.186	4.251	415.566	4	5	16	2	2	0.178
RU-0211; SPI-0211	136790-76-6	HY-B0679	FDA	C20H32F2O5	102.511	-3.35	3	-0.45	2	-3.26811	FALSE	All properties and OPS components are within expected ranges.	10.981	0.0229298	-19.1371	FALSE	All properties and OPS components are within expected ranges.	9.44832	0.251401	0	1.99317	TRUE	All properties and OPS components are within expected ranges.	9.98346	0.90843	3.831	93.533	3.831	390.462	2	5	14	1	0	0.221
DHA; Cervonic acid	6217-54-5	HY-B2167	EMA	C22H32O2	105.657	-4.629	2	1.24	0	-2.45526	FALSE	All properties and OPS components are within expected ranges.	13.1492	0.000213433	-8.15986	FALSE	All properties and OPS components are within expected ranges.	9.17709	0.369969	1	1.97026	TRUE	All properties and OPS components are within expected ranges.	9.68	0.960126	6.462	38.116	6.462	328.488	1	2	14	0	0	0.093
FPL60278AR	86484-91-5	HY-U00205	Other Countries	C22H34Cl2N2O2	101.885	-3.209	3	0.101	1	0.580852	TRUE	All properties and OPS components are within expected ranges.	10.6217	0.0435485	-3.06521	TRUE	All properties and OPS components are within expected ranges.	9.07319	0.420405	0	-1.77194	TRUE	All properties and OPS components are within expected ranges.	10.3832	0.784179	4.267	67.251	4.267	356.502	4	4	13	2	2	0.162
AHU-377	149709-62-6	HY-15407	EMA; FDA	C24H29NO5	95.6807	-3.666	3	-0.487	2	-3.91307	FALSE	All properties and OPS components are within expected ranges.	12.2981	0.0015326	-4.91355	FALSE	All properties and OPS components are within expected ranges.	10.5664	0.0224296	0	5.3691	TRUE	All properties and OPS components are within expected ranges.	11.8901	0.12005	3.758	94.458	3.758	411.491	2	5	12	2	2	0.21
FTY720 free base	162359-55-9	HY-11063	EMA; FDA	C19H33NO2	119.979	-3.038	3	0.065	1	-0.836102	FALSE	All properties and OPS components are within expected ranges.	12.3712	0.0013015	-7.74439	FALSE	All properties and OPS components are within expected ranges.	8.13302	0.8477	0	1.69036	TRUE	All properties and OPS components are within expected ranges.	11.4886	0.252821	4.199	68.17	4.198	307.471	3	3	12	1	1	0.179
FTY720	162359-56-0	HY-12005	EMA; FDA	C19H34ClNO2	119.979	-3.038	3	0.065	1	-0.836102	FALSE	All properties and OPS components are within expected ranges.	12.3712	0.0013015	-7.74439	FALSE	All properties and OPS components are within expected ranges.	8.13302	0.8477	0	1.69036	TRUE	All properties and OPS components are within expected ranges.	11.4886	0.252821	4.198	68.17	4.198	307.471	3	3	12	1	1	0.179
Ro 40-5967 (dihydrochloride)	116666-63-8	HY-15553A	FDA	C29H40Cl2FN3O3	105.381	-6.073	1	0.481	1	-3.2173	FALSE	All properties and OPS components are within expected ranges.	17.6292	1.91e-09	-3.32556	TRUE	All properties and OPS components are within expected ranges.	15.0372	2.36e-11	0	6.49622	TRUE	All properties and OPS components are within expected ranges.	13.7184	0.000358428	5.373	64.829	5.373	495.629	1	5	12	4	3	0.125
UK 68789	115256-11-6	HY-B0232	EMA; FDA	C19H27N3O5S2	99.9571	-2.621	3	-1.33	3	-34.7021	FALSE	All properties and OPS components are within expected ranges.	9.11771	0.348392	-0.327732	TRUE	All properties and OPS components are within expected ranges.	11.1581	0.0037031	0	-13.9585	FALSE	All properties and OPS components are within expected ranges.	10.5967	0.691435	1.679	107.106	1.679	441.565	2	6	11	2	2	0.27
SL75212	63659-19-8	HY-B0381A	FDA; NMPA	C18H30ClNO3	106.291	-2.436	3	-0.172	2	1.79213	TRUE	All properties and OPS components are within expected ranges.	14.1678	1.73e-05	-17.2461	FALSE	OPS PC4 out of range. Value: -4.7074. Training min, max, SD, explained variance: -4.6928, 7.4417, 2.104, 0.0552.	10.2108	0.055825	0	-34.0512	FALSE	All properties and OPS components are within expected ranges.	9.12459	0.994465	2.577	51.485	2.577	307.428	2	4	11	2	1	0.148
(S)-Betaxolol hydrochloride; AL-1577A	116209-55-3	HY-B0381B	FDA	C18H30ClNO3	106.291	-2.436	3	-0.172	2	1.79213	TRUE	All properties and OPS components are within expected ranges.	14.1678	1.73e-05	-17.2461	FALSE	OPS PC4 out of range. Value: -4.7074. Training min, max, SD, explained variance: -4.6928, 7.4417, 2.104, 0.0552.	10.2108	0.055825	0	-34.0512	FALSE	All properties and OPS components are within expected ranges.	9.12459	0.994465	2.577	51.485	2.577	307.428	2	4	11	2	1	0.148
IPD 1151T	94055-76-2	HY-17002	NMPA	C23H33NO7S2	101.878	-0.853	4	-0.97	3	-10.9831	FALSE	All properties and OPS components are within expected ranges._x005f_x000D_ Unknown FCFP_2 feature: 136358998: [*][S+]([*])C_x005f_x000D_ Unknown FCFP_2 feature: -832645980: [*]C[S+](C)C	16.1321	1.04e-07	-7.31607	FALSE	All properties and OPS components are within expected ranges._x005f_x000D_ Unknown FCFP_2 feature: -832645980: [*]C[S+](C)C	11.0131	0.00594398	0	-9.45768	FALSE	All properties and OPS components are within expected ranges._x005f_x000D_ Unknown FCFP_2 feature: -832645980: [*]C[S+](C)C	11.6295	0.198958	0.882	68.786	1.472	328.447	2	4	10	1	1	0.197
DU-23000 (maleate)	61718-82-9	HY-B0103A	FDA; NMPA	C19H25F3N2O6	98.9136	-3.829	3	-0.19	2	15.9438	TRUE	All properties and OPS components are within expected ranges.	9.79728	0.155478	-9.96945	FALSE	All properties and OPS components are within expected ranges.	13.509	1.39e-07	0	-11.1903	FALSE	All properties and OPS components are within expected ranges.	11.9533	0.104935	2.738	55.723	2.551	318.335	1	4	10	1	1	0.165
BMY-13754; MJ-13754-1	82752-99-6	HY-B1396	FDA	C25H33Cl2N5O2	118.988	-4.604	2	0.404	1	-31.2793	FALSE	All properties and OPS components are within expected ranges.	9.77208	0.160866	-1.99515	TRUE	All properties and OPS components are within expected ranges.	14.0508	7.47e-09	0	15.9435	TRUE	OPS PC11 out of range. Value: -5.6212. Training min, max, SD, explained variance: -5.2845, 6.3989, 1.696, 0.0237.	12.9863	0.00587825	4.415	50.964	4.415	470.007	0	5	10	4	2	0.105
YM178	223673-61-8	HY-14773	EMA; FDA; NMPA	C21H24N4O2S	97.4364	-3.296	3	-1.002	3	-6.5733	FALSE	All properties and OPS components are within expected ranges.	16.9044	1.33e-08	-6.54385	FALSE	All properties and OPS components are within expected ranges.	12.996	1.85e-06	0	-10.7521	FALSE	OPS PC16 out of range. Value: 4.8791. Training min, max, SD, explained variance: -4.8145, 4.584, 1.413, 0.0165.	14.2639	3.04e-05	2.453	101.537	2.26	396.506	4	5	9	3	3	0.316
HSR803	122892-31-3	HY-B0732	NMPA	C20H27ClN2O4	116.998	-3.278	3	-0.27	2	-4.58892	FALSE	OPS PC6 out of range. Value: 4.1467. Training min, max, SD, explained variance: -5.674, 3.9834, 1.993, 0.0519.	10.589	0.0460594	-0.768053	TRUE	All properties and OPS components are within expected ranges.	11.2109	0.00310219	0	3.3621	TRUE	OPS PC16 out of range. Value: -5.5957. Training min, max, SD, explained variance: -4.8145, 4.584, 1.413, 0.0165.	12.0686	0.081037	2.711	60.253	2.711	358.431	1	5	9	2	2	0.147
HCQ (sulfate)	747-36-4	HY-B1370	FDA; NMPA	C18H28ClN3O5S	99.9386	-3.833	3	0.151	1	8.83787	TRUE	All properties and OPS components are within expected ranges.	10.0385	0.110529	-1.5684	TRUE	All properties and OPS components are within expected ranges.	14.0918	5.95e-09	0	-2.84164	FALSE	OPS PC24 out of range. Value: -3.682. Training min, max, SD, explained variance: -3.3171, 3.4805, 1.198, 0.0118.	11.917	0.113429	3.457	48.239	3.457	335.872	2	4	9	2	2	0.131
SDX-105	3543-75-7	HY-B0077	FDA; NMPA	C16H22Cl3N3O2	98.3245	-4.019	2	0.042	1	-5.81471	FALSE	All properties and OPS components are within expected ranges._x005f_x000D_ Unknown FCFP_2 feature: -1208154531: [*]CCCl	24.9429	1.38e-17	-0.540707	TRUE	All properties and OPS components are within expected ranges.	12.6151	1.12e-05	0	9.3069	TRUE	All properties and OPS components are within expected ranges.	13.0572	0.00460543	3.606	58.078	3.606	358.263	1	4	9	2	2	0.159
(E)-Capsaicin	404-86-4	HY-10448	EMA; FDA; NMPA	C18H27NO3	95.0773	-3.411	3	0.107	1	-2.25007	FALSE	All properties and OPS components are within expected ranges.	15.3335	8.54e-07	-8.87003	FALSE	OPS PC11 out of range. Value: 5.0303. Training min, max, SD, explained variance: -4.0074, 4.0205, 1.463, 0.0267.	12.2296	6.18e-05	0	-6.58746	FALSE	All properties and OPS components are within expected ranges.	11.9526	0.105085	3.91	59.856	3.91	305.412	2	3	9	1	1	0.164
Zucapsaicin; Civamide; cis-Capsaicin	25775-90-0	HY-B1583	Other Countries	C18H27NO3	102.123	-3.411	3	0.107	1	-2.25007	FALSE	All properties and OPS components are within expected ranges.	15.3335	8.54e-07	-8.87003	FALSE	OPS PC11 out of range. Value: 5.0303. Training min, max, SD, explained variance: -4.0074, 4.0205, 1.463, 0.0267.	12.2296	6.18e-05	0	-6.58746	FALSE	All properties and OPS components are within expected ranges.	11.9526	0.105085	3.91	59.856	3.91	305.412	2	3	9	1	1	0.164
ACP-103	706779-91-1	HY-14557	FDA	C25H34FN3O2	106.155	-4.698	2	0.431	1	3.52066	TRUE	All properties and OPS components are within expected ranges.	13.4309	0.000108045	-1.97707	TRUE	All properties and OPS components are within expected ranges.	10.9954	0.00628923	0	5.26755	TRUE	All properties and OPS components are within expected ranges.	13.6422	0.000493275	4.234	45.746	4.234	427.555	1	3	8	3	2	0.095
BY1023; SKF96022	102625-70-7	HY-17507	EMA; FDA; NMPA	C16H15F2N3O4S	114.409	-4.324	2	-0.6	3	-18.9156	FALSE	All properties and OPS components are within expected ranges._x005f_x000D_ Unknown FCFP_2 feature: -814345653: [*]OC(F)F	14.5518	6.5e-06	-30.797	FALSE	All properties and OPS components are within expected ranges.	10.818	0.0108802	0	32.5624	TRUE	All properties and OPS components are within expected ranges.	8.74502	0.99901	2.737	81.668	2.737	383.37	1	6	7	3	3	0.283
BRL 49653C	155141-29-0	HY-14600	EMA; FDA; NMPA	C22H23N3O7S	107.083	-4.37	2	-0.207	2	-3.5372	FALSE	All properties and OPS components are within expected ranges.	12.7396	0.000560869	-20.29	FALSE	All properties and OPS components are within expected ranges.	11.4556	0.00131778	0	19.9668	TRUE	All properties and OPS components are within expected ranges.	12.4031	0.034992	3.462	70.955	3.268	357.427	1	6	7	3	2	0.269
BM15075	41859-67-0	HY-B0637	EMA; NMPA	C19H20ClNO4	116.821	-4.276	2	-0.179	2	-3.10481	FALSE	All properties and OPS components are within expected ranges.	14.7192	4.22e-06	-2.45928	TRUE	All properties and OPS components are within expected ranges.	12.0941	0.000109652	0	18.7681	TRUE	All properties and OPS components are within expected ranges.	12.4211	0.0333211	3.868	77.157	3.868	361.819	2	4	7	2	2	0.203
U 72107	111025-46-8	HY-13956	EMA; FDA; NMPA	C19H20N2O3S	111.674	-4.911	2	0.044	1	-5.61138	FALSE	All properties and OPS components are within expected ranges.	15.033	1.87e-06	-21.2664	FALSE	All properties and OPS components are within expected ranges.	9.71374	0.159748	0	21.1035	TRUE	All properties and OPS components are within expected ranges.	11.4275	0.278523	4.102	67.602	3.907	356.439	1	5	7	3	2	0.262
Sch 1000	22254-24-6	HY-B0241	FDA; NMPA	C20H30BrNO3	97.517	-1.988	4	-0.561	3	-3.35619	FALSE	All properties and OPS components are within expected ranges._x005f_x000D_ Unknown FCFP_2 feature: -2076001612: [*]CC1C[*][*][N+]1([*])[*]_x005f_x000D_ Unknown FCFP_2 feature: 609127571: [*]C([*])[N+]1(C)C([*])[*][*]C1[*]_x005f_x000D_ Unknown FCFP_2 feature: 136358998: [*][S+]([*])C	11.4749	0.00882111	-11.99	FALSE	All properties and OPS components are within expected ranges.	7.34488	0.982935	0	-26.4578	FALSE	All properties and OPS components are within expected ranges.	9.03753	0.996165	1.092	47.046	1.092	332.457	1	3	6	3	1	0.128
SQ-11725	42200-33-9	HY-B0804	FDA	C17H27NO4	100.356	-1.447	4	-1.132	3	-2.28653	FALSE	All properties and OPS components are within expected ranges.	11.1319	0.0172715	-12.9442	FALSE	All properties and OPS components are within expected ranges.	8.89909	0.508276	0	-13.8746	FALSE	All properties and OPS components are within expected ranges.	8.15531	0.999965	1.146	84.186	1.146	309.401	4	5	6	2	1	0.238
PNU180638	181183-52-8	HY-B0383	FDA	C21H31N3O7S	106.736	-3.687	3	-0.396	2	-6.83956	FALSE	All properties and OPS components are within expected ranges._x005f_x000D_ Unknown FCFP_2 feature: 1704082462: [*]CS(=O)(=O)N([*])[*]	17.6884	1.63e-09	-2.24216	TRUE	All properties and OPS components are within expected ranges._x005f_x000D_ Unknown FCFP_2 feature: 1704082462: [*]CS(=O)(=O)N([*])[*]	12.7268	6.67e-06	0	-16.6558	FALSE	All properties and OPS components are within expected ranges._x005f_x000D_ Unknown FCFP_2 feature: 1704082462: [*]CS(=O)(=O)N([*])[*]	11.9995	0.0947907	2.103	56.361	2.103	335.464	1	3	6	3	2	0.182
NO050328 hydrochloride; NO328 hydrochloride; TGB hydrochloride	145821-59-6	HY-B0696A	FDA	C20H26ClNO2S2	96.2319	-5.329	2	0.683	1	-2.4674	FALSE	All properties and OPS components are within expected ranges.	16.6209	2.83e-08	-19.5461	FALSE	All properties and OPS components are within expected ranges.	10.1931	0.0582056	0	17.4436	TRUE	All properties and OPS components are within expected ranges.	12.5571	0.0227192	4.832	41.468	2.252	375.548	1	3	6	3	2	0.247
CM346	173352-21-1	HY-14895	Other Countries	C15H21N3O2S	95.9189	-3.889	3	-0.106	2	-3.77493	FALSE	All properties and OPS components are within expected ranges._x005f_x000D_ Unknown FCFP_2 feature: -1410020105: [*]S[c]1:[nH]:[*]:[*]:n:1	13.4944	9.25e-05	-6.27571	FALSE	All properties and OPS components are within expected ranges._x005f_x000D_ Unknown FCFP_2 feature: -1410020105: [*]S[c]1:[nH]:[*]:[*]:n:1	11.3234	0.0021075	0	-0.429357	TRUE	All properties and OPS components are within expected ranges._x005f_x000D_ Unknown FCFP_2 feature: -1410020105: [*]S[c]1:[nH]:[*]:[*]:n:1	11.962	0.102953	2.587	47.528	2.587	307.411	1	5	6	3	2	0.234
CM346 hydrochloride	173352-39-1	HY-14895A	Other Countries	C15H22ClN3O2S	95.9189	-3.889	3	-0.106	2	-3.77493	FALSE	All properties and OPS components are within expected ranges._x005f_x000D_ Unknown FCFP_2 feature: -1410020105: [*]S[c]1:[nH]:[*]:[*]:n:1	13.4944	9.25e-05	-6.27571	FALSE	All properties and OPS components are within expected ranges._x005f_x000D_ Unknown FCFP_2 feature: -1410020105: [*]S[c]1:[nH]:[*]:[*]:n:1	11.3234	0.0021075	0	-0.429357	TRUE	All properties and OPS components are within expected ranges._x005f_x000D_ Unknown FCFP_2 feature: -1410020105: [*]S[c]1:[nH]:[*]:[*]:n:1	11.962	0.102953	2.587	47.528	2.587	307.411	1	5	6	3	2	0.234
R-1929	1649-18-9	HY-B1470	Other Countries	C19H22FN3O	101.205	-4.153	2	0.329	1	11.8792	TRUE	All properties and OPS components are within expected ranges.	11.822	0.00431106	-0.917799	TRUE	All properties and OPS components are within expected ranges.	11.2408	0.00280219	0	18.0293	TRUE	All properties and OPS components are within expected ranges.	11.3009	0.335642	3.368	35.266	3.368	327.396	0	4	6	3	2	0.105
LX-4211; LP-802034	1018899-04-1	HY-15516	EMA	C21H25ClO5S	123.337	-4.189	2	-0.271	2	0.247334	FALSE	All properties and OPS components are within expected ranges.	13.4574	0.00010126	-5.52189	FALSE	All properties and OPS components are within expected ranges.	15.7954	2.03e-13	0	1.31464	TRUE	All properties and OPS components are within expected ranges.	15.6506	1.49e-08	3.734	80.306	3.734	424.938	3	6	6	3	2	0.25
A4166; Senaglinide	105816-04-4	HY-B0422	EMA; FDA; NMPA	C19H27NO3	100.859	-4.124	2	-0.003	2	-6.97857	FALSE	All properties and OPS components are within expected ranges.	9.50105	0.227496	-7.53782	FALSE	All properties and OPS components are within expected ranges.	8.40056	0.748397	0	9.26617	TRUE	All properties and OPS components are within expected ranges.	13.0362	0.00495288	3.981	68.227	3.981	317.423	2	3	6	2	1	0.194
PA-824; (S)-PA 824	187235-37-6	HY-10844	FDA	C14H12F3N3O5	102.006	-5.363	2	-0.189	2	-3.83705	FALSE	All properties and OPS components are within expected ranges._x005f_x000D_ Unknown FCFP_2 feature: -1410079687: [*]N([*])[c](:n:[*]):n:[*]	13.8352	3.99e-05	-7.71878	FALSE	All properties and OPS components are within expected ranges._x005f_x000D_ Unknown FCFP_2 feature: -1029027238: [*]OC(F)(F)F	12.0291	0.000143541	0	1.83912	TRUE	All properties and OPS components are within expected ranges.	13.8944	0.000167416	4.301	86.222	4.301	359.257	0	6	6	3	2	0.274
Ro 14-4767/002	78613-38-4	HY-B0238	NMPA	C21H36ClNO	96.68	-5.892	2	1.29	0	2.79329	TRUE	All properties and OPS components are within expected ranges.	14.8954	2.68e-06	-3.05515	TRUE	All properties and OPS components are within expected ranges.	8.74162	0.588373	0	4.37118	TRUE	All properties and OPS components are within expected ranges.	11.4724	0.259521	5.299	12.282	5.299	317.509	0	2	6	2	1	0.031
KAD-1229 (anhydrous); S21403 (anhydrous)	145525-41-3	HY-17398	NMPA	C19H24NO3.1/2Ca	99.8325	-2.805	3	-0.552	3	-6.43921	FALSE	OPS PC8 out of range. Value: 4.9272. Training min, max, SD, explained variance: -4.2516, 4.6021, 1.692, 0.0374._x005f_x000D_ Unknown FCFP_2 feature: -367494947: [*]C([*])C(=O)[O-]_x005f_x000D_ Unknown FCFP_2 feature: 260714409: [*]C(=[*])[O-]	12.1981	0.001913	-10.1328	FALSE	All properties and OPS components are within expected ranges.	8.84072	0.538085	0	1.86901	TRUE	All properties and OPS components are within expected ranges.	10.5455	0.715119	1.542	55.254	1.542	314.399	0	3	5	3	1	0.184
PXD101; PX105684	866323-14-0	HY-10225	FDA	C15H14N2O4S	103.546	-2.488	3	-1.205	3	-14.7813	FALSE	All properties and OPS components are within expected ranges._x005f_x000D_ Unknown FCFP_2 feature: 1666606459: [*]C(=[*])NO_x005f_x000D_ Unknown FCFP_2 feature: -548542844: [*]NO	10.6718	0.0399382	-0.744872	TRUE	All properties and OPS components are within expected ranges._x005f_x000D_ Unknown FCFP_2 feature: 1666606459: [*]C(=[*])NO_x005f_x000D_ Unknown FCFP_2 feature: -548542844: [*]NO	10.0366	0.083148	0	4.62914	TRUE	All properties and OPS components are within expected ranges.	13.2706	0.00213232	1.633	98.338	1.8	318.348	3	4	5	2	2	0.347
GR-85548A hydrochloride	143388-64-1	HY-B0197A	FDA	C17H26ClN3O2S	114.595	-3.873	3	-0.561	3	-5.35171	FALSE	All properties and OPS components are within expected ranges.	14.7392	4.01e-06	-3.86848	TRUE	All properties and OPS components are within expected ranges.	12.9294	2.55e-06	0	-19.3504	FALSE	All properties and OPS components are within expected ranges.	11.5477	0.22931	2.053	65.819	2.053	335.464	2	3	5	3	2	0.211
Indoramine; Wy 21901	26844-12-2	HY-12760	EMA	C22H25N3O	101.185	-4.534	2	0.113	1	-0.827207	FALSE	All properties and OPS components are within expected ranges.	16.3429	5.93e-08	-1.52398	TRUE	OPS PC15 out of range. Value: 4.5165. Training min, max, SD, explained variance: -4.0077, 3.8442, 1.218, 0.0185.	13.107	1.07e-06	0	-19.1975	FALSE	All properties and OPS components are within expected ranges.	12.3528	0.0400501	3.347	48.518	3.347	347.453	2	2	5	4	3	0.134
PNU-100766	165800-03-3	HY-10394	FDA; NMPA	C16H20FN3O4	95.0646	-2.478	3	-1.017	3	-29.8087	FALSE	All properties and OPS components are within expected ranges.	9.01264	0.386295	-2.98888	TRUE	All properties and OPS components are within expected ranges.	11.3144	0.0021743	0	-23.8286	FALSE	All properties and OPS components are within expected ranges.	12.047	0.0851624	0.894	71.976	0.894	337.346	1	5	4	3	1	0.209
OZ 277; RBx 11160	664338-39-0	HY-10852	Other Countries	C22H36N2O4	112.638	-5.399	2	-0.508	2	-10.344	FALSE	All properties and OPS components are within expected ranges.	13.0148	0.000294003	-11.1534	FALSE	All properties and OPS components are within expected ranges.	9.56864	0.206604	0	-8.21768	FALSE	All properties and OPS components are within expected ranges.	11.9613	0.103122	3.125	83.441	1.984	392.532	2	5	4	6	0	0.213
ASP1941	761423-87-4	HY-14894	Other Countries	C21H21FO5S	117.32	-3.46	3	-0.914	3	-1.16831	FALSE	All properties and OPS components are within expected ranges.	14.972	2.19e-06	-0.205343	TRUE	All properties and OPS components are within expected ranges.	11.5705	0.000865219	0	0.163503	TRUE	All properties and OPS components are within expected ranges.	14.9142	1.07e-06	2.259	92.192	2.35	404.452	4	5	4	4	3	0.315
BRL29060	61869-08-7	HY-122272	FDA; NMPA	C19H20FNO3	100.793	-4.712	2	0.218	1	16.7987	TRUE	All properties and OPS components are within expected ranges.	8.18574	0.707812	3.31318	TRUE	All properties and OPS components are within expected ranges.	10.0364	0.0831866	0	23.2222	TRUE	All properties and OPS components are within expected ranges.	8.81906	0.99858	3.229	39.6	3.229	329.365	1	4	4	4	2	0.126
Bay H-4502	60628-96-8	HY-B0301	NMPA	C22H18N2	99.4582	-5.733	2	1.016	0	3.04418	TRUE	All properties and OPS components are within expected ranges._x005f_x000D_ Unknown FCFP_2 feature: -929304517: [*]:n(:[*])C([c](:[*]):[*])[c](:[*]):[*]	8.11921	0.731659	-1.17692	TRUE	All properties and OPS components are within expected ranges._x005f_x000D_ Unknown FCFP_2 feature: -929304517: [*]:n(:[*])C([c](:[*]):[*])[c](:[*]):[*]	9.08768	0.413252	0	5.75739	TRUE	All properties and OPS components are within expected ranges._x005f_x000D_ Unknown FCFP_2 feature: -929304517: [*]:n(:[*])C([c](:[*]):[*])[c](:[*]):[*]	9.31926	0.988135	4.637	16.609	4.637	310.392	0	1	4	4	4	0.055
Volitinib; HMPL-504; AZD-6094	1313725-88-0	HY-15959	NMPA	C17H15N9	110.772	-3.613	3	-1.04	3	-4.91191	FALSE	All properties and OPS components are within expected ranges._x005f_x000D_ Unknown FCFP_2 feature: -1564473960: [*]:n:[c]1:n:[*]:[*]:[c]:1:[*]_x005f_x000D_ Unknown FCFP_2 feature: 813952683: [*]:n(:[*])C(C)[c](:[*]):[*]_x005f_x000D_ Unknown FCFP_2 feature: -203115083: [*]:[c]1:[*]:[*]:c:n:1:c:[*]	10.572	0.0474056	0.318815	TRUE	All properties and OPS components are within expected ranges._x005f_x000D_ Unknown FCFP_2 feature: 813952683: [*]:n(:[*])C(C)[c](:[*]):[*]_x005f_x000D_ Unknown FCFP_2 feature: -203115083: [*]:[c]1:[*]:[*]:c:n:1:c:[*]	11.5503	0.000932482	0	-0.678896	TRUE	All properties and OPS components are within expected ranges.	12.6029	0.0198754	1.415	83.61	1.032	345.361	0	6	3	5	5	0.264
MK-3102	1226781-44-7	HY-15981	Other Countries	C17H20F2N4O3S	113.342	-3.925	3	-1.239	3	-5.63357	FALSE	All properties and OPS components are within expected ranges._x005f_x000D_ Unknown FCFP_2 feature: 646501670: [*]:n(:[*])S(=O)(=O)C	17.0316	9.44e-09	-2.48054	TRUE	All properties and OPS components are within expected ranges._x005f_x000D_ Unknown FCFP_2 feature: 646501670: [*]:n(:[*])S(=O)(=O)C	15.3781	2.87e-12	0	-0.66188	TRUE	All properties and OPS components are within expected ranges._x005f_x000D_ Unknown FCFP_2 feature: 646501670: [*]:n(:[*])S(=O)(=O)C	15.2289	1.83e-07	1.098	90.033	1.098	398.428	1	6	3	4	2	0.266
MK-906	98319-26-7	HY-13635	FDA; NMPA	C23H36N2O2	117.123	-4.987	2	-0.126	2	-4.74581	FALSE	All properties and OPS components are within expected ranges.	13.5046	9.02e-05	-1.95744	TRUE	All properties and OPS components are within expected ranges.	9.31053	0.30888	0	20.1895	TRUE	All properties and OPS components are within expected ranges.	11.5078	0.24507	3.174	60.222	3.174	372.544	2	2	2	4	0	0.142
Piperazine estrone sulfate; Estrone sulfate piperazine salt	7280-37-7	HY-B1361	FDA	C22H32N2O5S	99.5972	-5.018	2	-0.35	2	-5.48035	FALSE	All properties and OPS components are within expected ranges._x005f_x000D_ Unknown FCFP_2 feature: -1533214669: [*]OS(=O)(=O)O	15.5152	5.3e-07	-5.44722	FALSE	All properties and OPS components are within expected ranges._x005f_x000D_ Unknown FCFP_2 feature: -1533214669: [*]OS(=O)(=O)O	10.9831	0.00654005	0	9.65466	TRUE	All properties and OPS components are within expected ranges.	10.7463	0.618265	3.545	81.648	3.545	350.429	1	5	2	4	1	0.279
W-3566	152-43-2	HY-B1012	FDA; NMPA	C25H32O2	118.131	-7.298	1	1.389	0	-0.385122	FALSE	All properties and OPS components are within expected ranges.	14.9769	2.17e-06	-6.14719	FALSE	All properties and OPS components are within expected ranges.	9.49753	0.232443	1	27.2213	TRUE	All properties and OPS components are within expected ranges.	9.6135	0.967503	6.514	29.745	6.514	364.52	1	2	2	5	1	0.08
CB-7598	154229-19-3	HY-70013	EMA; FDA	C24H31NO	96.6956	-5.597	2	0.644	1	-2.67194	FALSE	All properties and OPS components are within expected ranges.	15.2047	1.2e-06	-3.04642	TRUE	All properties and OPS components are within expected ranges.	11.645	0.000654377	0	2.82148	TRUE	All properties and OPS components are within expected ranges.	10.6179	0.68143	4.223	32.076	4.223	349.509	1	2	1	5	1	0.091

## Sheet: potential target
		Libdock score	ADMET_Sloubility	ADMET_Sloubility_level	ADMET_Sloubility	ADMET_Sloubility_level	ADMET_EXT_CYP2D6	ADMET_EXT_CYP2D6_Prediction	ADMET_EXT_CYP2D6_Applicability	ADMET_EXT_CYP2D6_Applicability_MD	ADMET_EXT_CYP2D6_Applicability_MDpvalue	ADMET_EXT_Hepatotoxic	ADMET_EXT_Hepatotoxic_prediction	ADMET_EXT_Hepatotoxic_Applicability	ADMET_EXT_Hepatotoxic_Applicability_MD	ADMET_EXT_Hepatotoxic_Applicability_MDpvaluue	ADMET_Absorption_Level	ADMET_EXT_PPB	ADMET_EXT_PPB_Prediction	ADMET_EXT_PPB_Applicability	ADMET_EXT_PPB_Applicability_MD	ADMET_EXT_PPB_Applicability_MDpvalue	ADMET_AlogP98		AlogP	Molecular weight	Num_H_Donors	Num_H_Acceptors	Num_RotatableBonds	Num_Rings	Num_AromaticRings	Molecular_FractionalPolarSurfaceArea
PNU-100766		95.0646	-2.478	3	-1.017	3	-29.8087	FALSE	All properties and OPS components are within expected ranges.	9.01264	0.386295	-2.98888	TRUE	All properties and OPS components are within expected ranges.	11.3144	0.0021743	0	-23.8286	FALSE	All properties and OPS components are within expected ranges.	12.047	0.0851624	0.894	71.976	0.894	337.346	1	5	4	3	1	0.209
OZ 277; RBx 11160		112.638	-5.399	2	-0.508	2	-10.344	FALSE	All properties and OPS components are within expected ranges.	13.0148	0.000294003	-11.1534	FALSE	All properties and OPS components are within expected ranges.	9.56864	0.206604	0	-8.21768	FALSE	All properties and OPS components are within expected ranges.	11.9613	0.103122	3.125	83.441	1.984	392.532	2	5	4	6	0	0.213
ASP1941		117.32	-3.46	3	-0.914	3	-1.16831	FALSE	All properties and OPS components are within expected ranges.	14.972	2.19e-06	-0.205343	TRUE	All properties and OPS components are within expected ranges.	11.5705	0.000865219	0	0.163503	TRUE	All properties and OPS components are within expected ranges.	14.9142	1.07e-06	2.259	92.192	2.35	404.452	4	5	4	4	3	0.315
BRL29060		100.793	-4.712	2	0.218	1	16.7987	TRUE	All properties and OPS components are within expected ranges.	8.18574	0.707812	3.31318	TRUE	All properties and OPS components are within expected ranges.	10.0364	0.0831866	0	23.2222	TRUE	All properties and OPS components are within expected ranges.	8.81906	0.99858	3.229	39.6	3.229	329.365	1	4	4	4	2	0.126
Bay H-4502		99.4582	-5.733	2	1.016	0	3.04418	TRUE	All properties and OPS components are within expected ranges._x005f_x000D_ Unknown FCFP_2 feature: -929304517: [*]:n(:[*])C([c](:[*]):[*])[c](:[*]):[*]	8.11921	0.731659	-1.17692	TRUE	All properties and OPS components are within expected ranges._x005f_x000D_ Unknown FCFP_2 feature: -929304517: [*]:n(:[*])C([c](:[*]):[*])[c](:[*]):[*]	9.08768	0.413252	0	5.75739	TRUE	All properties and OPS components are within expected ranges._x005f_x000D_ Unknown FCFP_2 feature: -929304517: [*]:n(:[*])C([c](:[*]):[*])[c](:[*]):[*]	9.31926	0.988135	4.637	16.609	4.637	310.392	0	1	4	4	4	0.055
Volitinib; HMPL-504; AZD-6094		110.772	-3.613	3	-1.04	3	-4.91191	FALSE	All properties and OPS components are within expected ranges._x005f_x000D_ Unknown FCFP_2 feature: -1564473960: [*]:n:[c]1:n:[*]:[*]:[c]:1:[*]_x005f_x000D_ Unknown FCFP_2 feature: 813952683: [*]:n(:[*])C(C)[c](:[*]):[*]_x005f_x000D_ Unknown FCFP_2 feature: -203115083: [*]:[c]1:[*]:[*]:c:n:1:c:[*]	10.572	0.0474056	0.318815	TRUE	All properties and OPS components are within expected ranges._x005f_x000D_ Unknown FCFP_2 feature: 813952683: [*]:n(:[*])C(C)[c](:[*]):[*]_x005f_x000D_ Unknown FCFP_2 feature: -203115083: [*]:[c]1:[*]:[*]:c:n:1:c:[*]	11.5503	0.000932482	0	-0.678896	TRUE	All properties and OPS components are within expected ranges.	12.6029	0.0198754	1.415	83.61	1.032	345.361	0	6	3	5	5	0.264
MK-3102		113.342	-3.925	3	-1.239	3	-5.63357	FALSE	All properties and OPS components are within expected ranges._x005f_x000D_ Unknown FCFP_2 feature: 646501670: [*]:n(:[*])S(=O)(=O)C	17.0316	9.44e-09	-2.48054	TRUE	All properties and OPS components are within expected ranges._x005f_x000D_ Unknown FCFP_2 feature: 646501670: [*]:n(:[*])S(=O)(=O)C	15.3781	2.87e-12	0	-0.66188	TRUE	All properties and OPS components are within expected ranges._x005f_x000D_ Unknown FCFP_2 feature: 646501670: [*]:n(:[*])S(=O)(=O)C	15.2289	1.83e-07	1.098	90.033	1.098	398.428	1	6	3	4	2	0.266
MK-906		117.123	-4.987	2	-0.126	2	-4.74581	FALSE	All properties and OPS components are within expected ranges.	13.5046	9.02e-05	-1.95744	TRUE	All properties and OPS components are within expected ranges.	9.31053	0.30888	0	20.1895	TRUE	All properties and OPS components are within expected ranges.	11.5078	0.24507	3.174	60.222	3.174	372.544	2	2	2	4	0	0.142
Piperazine estrone sulfate; Estrone sulfate piperazine salt		99.5972	-5.018	2	-0.35	2	-5.48035	FALSE	All properties and OPS components are within expected ranges._x005f_x000D_ Unknown FCFP_2 feature: -1533214669: [*]OS(=O)(=O)O	15.5152	5.3e-07	-5.44722	FALSE	All properties and OPS components are within expected ranges._x005f_x000D_ Unknown FCFP_2 feature: -1533214669: [*]OS(=O)(=O)O	10.9831	0.00654005	0	9.65466	TRUE	All properties and OPS components are within expected ranges.	10.7463	0.618265	3.545	81.648	3.545	350.429	1	5	2	4	1	0.279
W-3566		118.131	-7.298	1	1.389	0	-0.385122	FALSE	All properties and OPS components are within expected ranges.	14.9769	2.17e-06	-6.14719	FALSE	All properties and OPS components are within expected ranges.	9.49753	0.232443	1	27.2213	TRUE	All properties and OPS components are within expected ranges.	9.6135	0.967503	6.514	29.745	6.514	364.52	1	2	2	5	1	0.08
CB-7598		96.6956	-5.597	2	0.644	1	-2.67194	FALSE	All properties and OPS components are within expected ranges.	15.2047	1.2e-06	-3.04642	TRUE	All properties and OPS components are within expected ranges.	11.645	0.000654377	0	2.82148	TRUE	All properties and OPS components are within expected ranges.	10.6179	0.68143	4.223	32.076	4.223	349.509	1	2	1	5	1	0.091
