# Supplementary material for: Targeting Tumour Microtubes to Disrupt Glioma Networks
Source: Research Square preprint supplement (doi:10.21203/rs.3.rs-8605748/v1), 2026-04-07
Supplement: Supplementary file 1 [file cc1ebb133dbd6fd09aaac483.pdf]

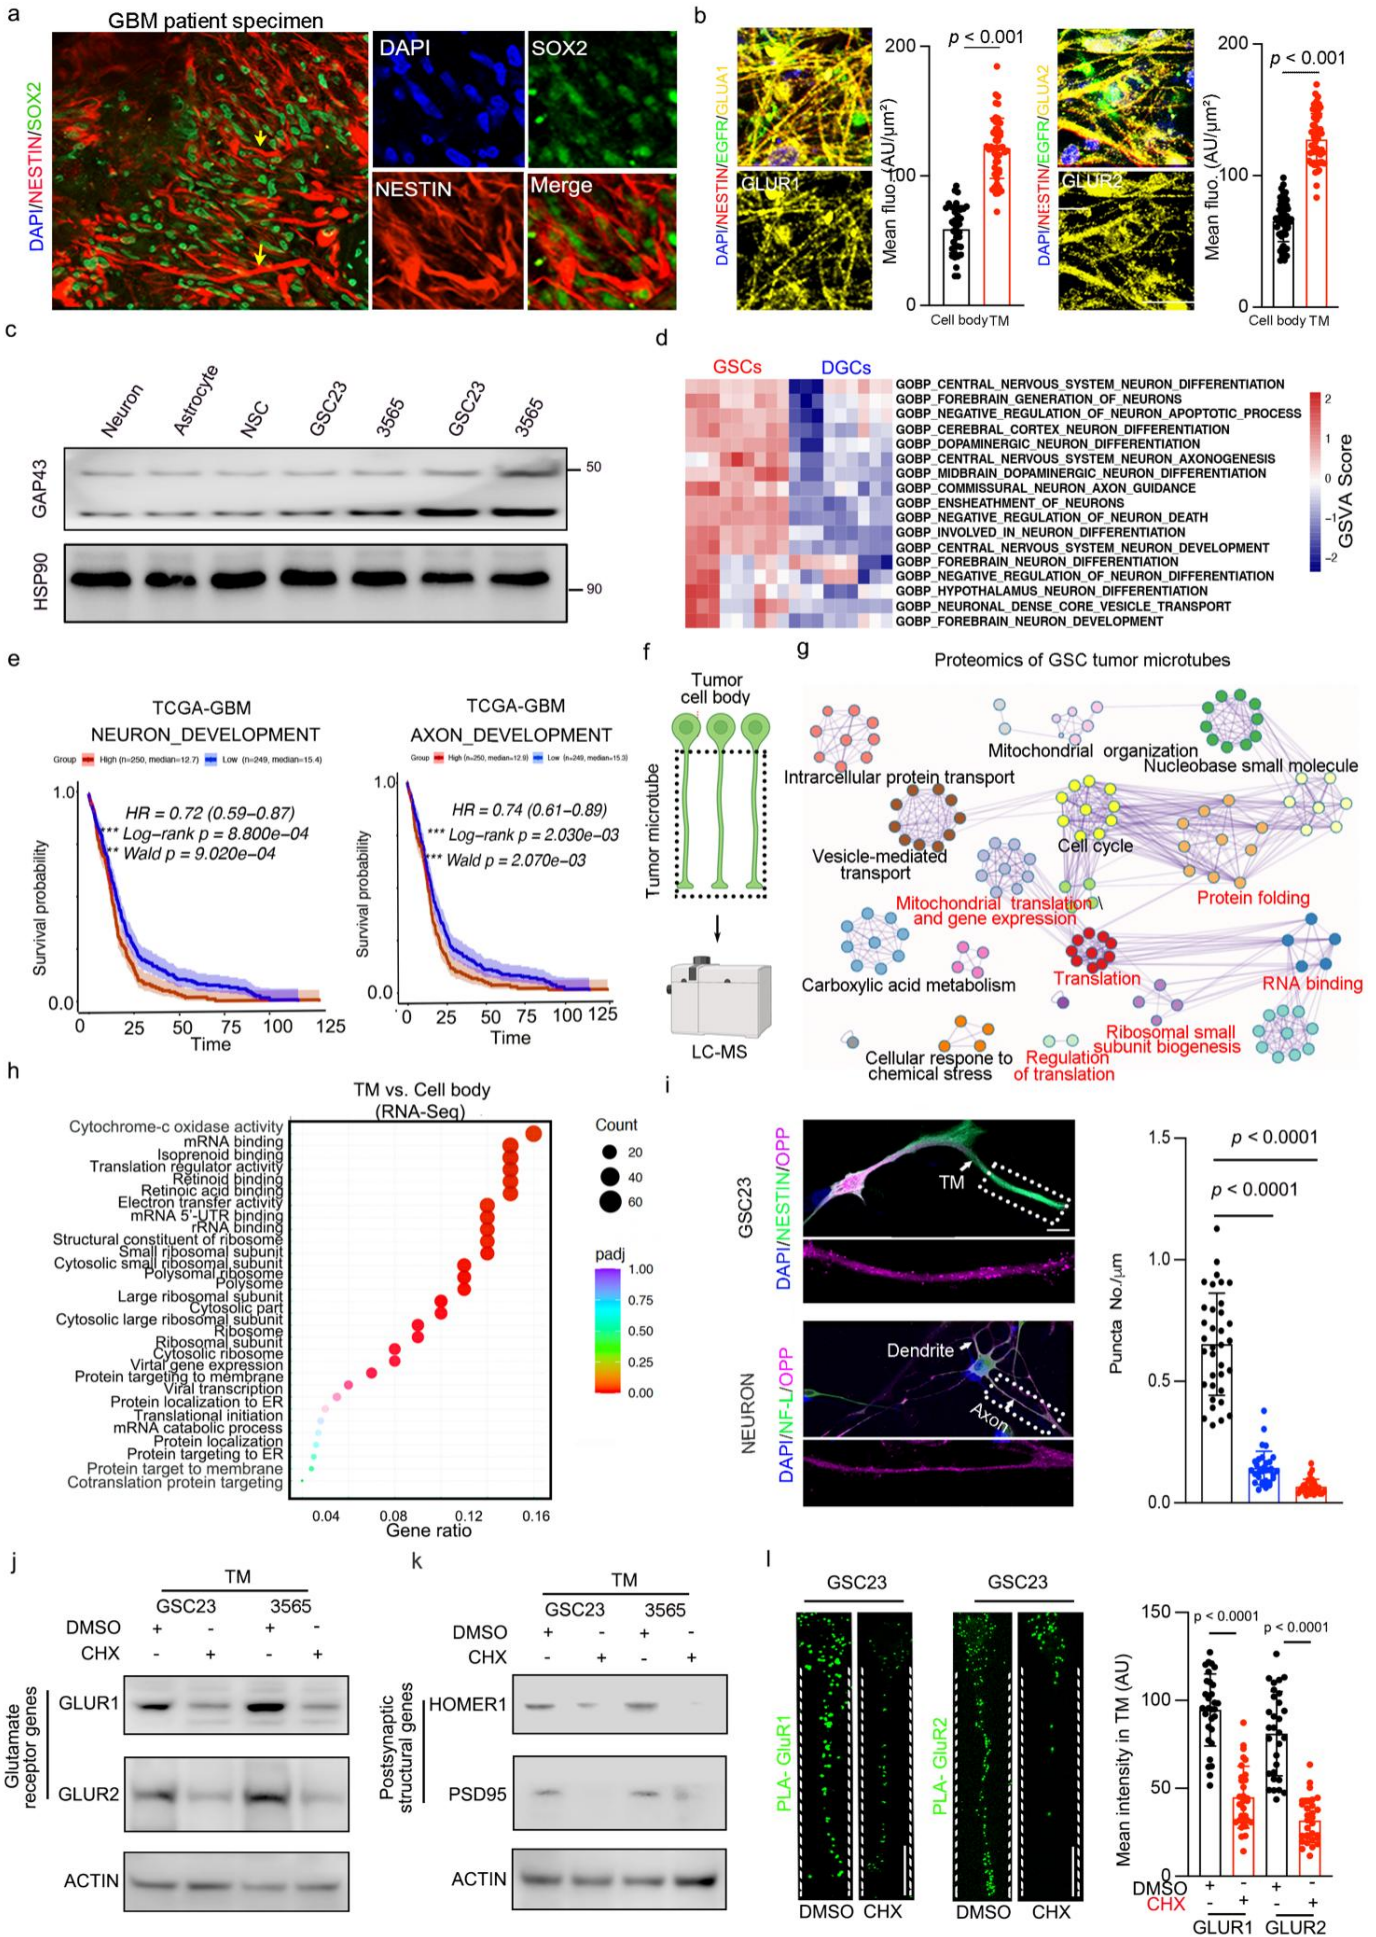

1 **Extended Data Figure 1. Neuron–glioma synapse formation is dependent on**  
2 **local protein synthesis.**

3 a, Representative immunofluorescence staining of DAPI (blue), NESTIN (red), and  
4 SOX2 (green) in GSC23. Scale bars: 100  $\mu$ m.

5 b, Patient-derived glioblastoma surgical biopsy specimens underwent  
6 immunofluorescent staining for a tumor cell marker [EGFR (green)], stem cell  
7 marker [Nestin (magenta)], neurotransmitter receptor [GluR1, GluR2 (yellow)],  
8 and general marker of nuclei [DAPI (blue)]. Representative images are shown.  
9 Scale bar: 40  $\mu$ m. Right: Quantitative analysis of immunofluorescence intensity  
10 in cell body and TM.

11 c, Western blot analysis of the expression of GAP43 in different cell types (GSCs,  
12 DGCs, NSC ENSA, neuron, and astrocyte).

13 d, The GSVA analysis results of neuronal development-related gene sets in GSCs  
14 and DGCs. Rows represent different GOBP terms. The heatmap colors range  
15 from blue to red, corresponding to GSVA scores from low to high.

16 e, Kaplan–Meier overall survival analysis based on neuronal development and axon  
17 development gene signatures in IDH-wildtype glioma patients from the TCGA  
18 cohort.

19 f, Schematic depicting experimental setup. Glioma cells were cultured in one  
20 compartment of a microfluidic device; After 7 days, compartments were  
21 separately lysed for proteomic analysis.

22 g, Functional analysis of the proteome identified within TMs. A network diagram  
23 was constructed with enriched terms as nodes and similarities as edges. Each  
24 color of the nodes represented a various term.

25 h, Transcriptome analysis of separated TMs and cell bodies.

26 i, Representative fluorescence images for puromycin incorporation in GSC23.  
27 OPP incorporation was detected by labeling with Alexa Fluor 647 using Click  
28 chemistry. DAPI (blue), Nestin (green) or NF-L (green), OPP (Magenta). Right:  
29 Quantitative analysis of immunofluorescence intensity in GSC23 TM, neuron  
30 (axon and dendrite). Scale bar: 10  $\mu$ m.

31 j, Patient-derived GSCs were treated with either vehicle control (DMSO) or CHX  
32 for 12 hours. TMs were harvested, resolved by SDS-PAGE, and immunoblotted  
33 for AMPA receptors (GluR1 and GluA2). ACTIN was used as a loading control.

34 k, Patient-derived GSCs were treated with either vehicle control (DMSO) or CHX  
35 for 12 hours. TMs were harvested, resolved by SDS-PAGE, and immunoblotted  
36 for markers of postsynaptic structures (HOMER1 and PSD95). ACTIN was used  
37 as a loading control.

38 l, Left: Patient-derived GSCs (GSC23) were cultured with either vehicle control  
39 (DMSO) or cycloheximide (CHX (10  $\mu$ g/ml)) for 12 hours to inhibit protein  
40 translation. Proximity ligation assays (PLAs) were used to detect nascent GLUR1  
41 (left) or GLUR2 (right) in TMs. Scale bar: 40  $\mu$ m. Right: Data were quantified  
42 from cells from more than 3 chambers per condition in three independent  
43 experiments. DMSO, n = 64; CHX, n = 50.

44 Representative of three independent experiments in a, b, i-l. Data are presented as mean  $\pm$  SD.  
45 One-way ANOVA followed by multiple comparisons with adjusted p-values for i and l. log-rank  
46 test for e.

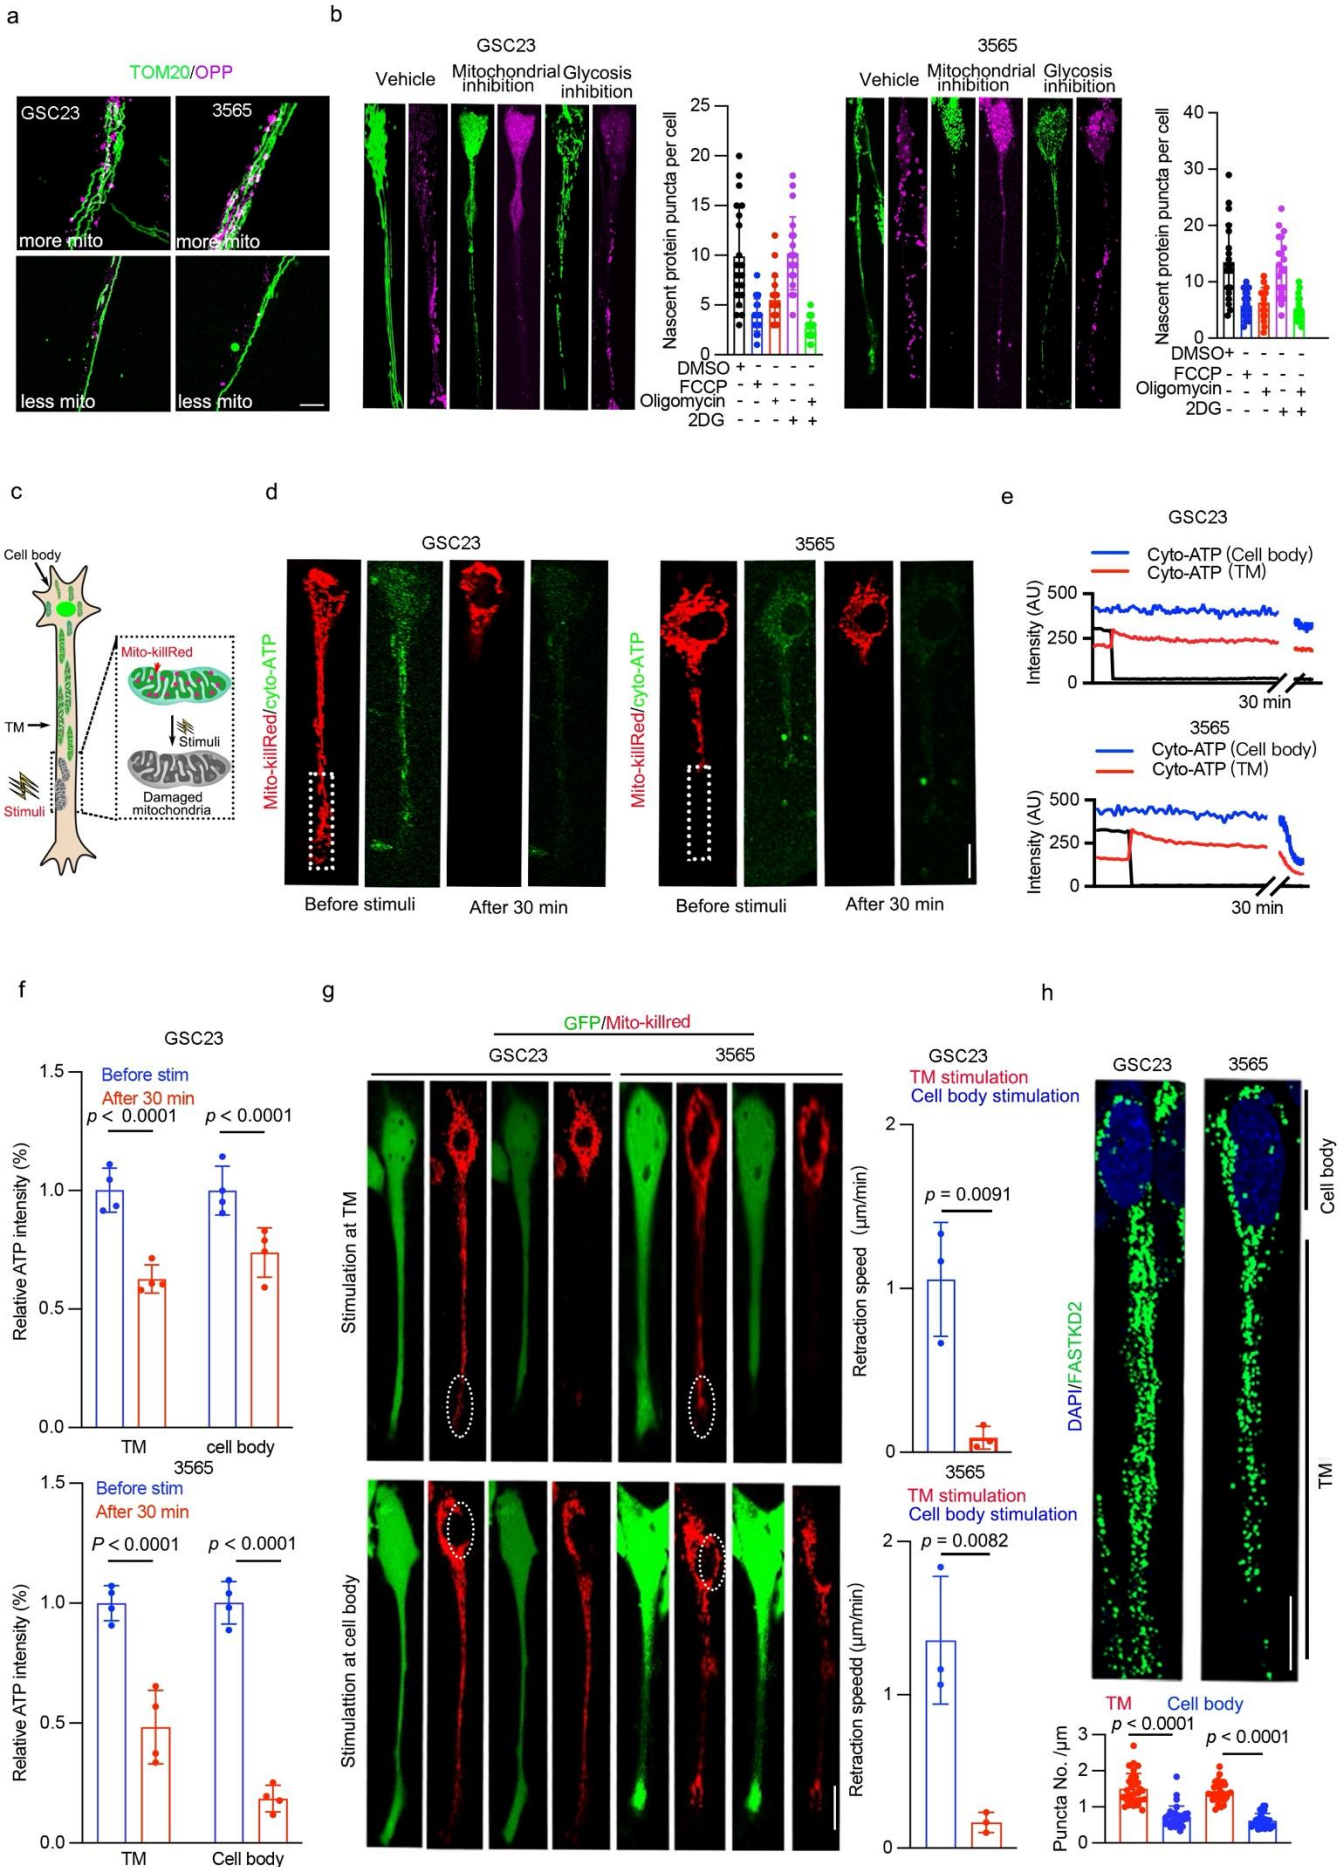

47 **Extended Data Figure 2. Mitochondrial protein FASTKD2 maintains local**  
48 **protein synthesis and TM formation.**

49 a, Representative fluorescent images of nascent protein puncta (OPP, magenta)  
50 and mitochondria (TOM20, green) in GSCs. Nascent protein puncta were  
51 detected by labeling with Alexa Fluor 647 using Click chemistry. Scale bar: 40  
52  $\mu\text{m}$ .

53 b, Left: Representative fluorescent images of nascent protein puncta (OPP,  
54 magenta) and mitochondria (TOM20, green) in GSCs in the presence of FCCP  
55 (mitochondrial inhibition) and 2DG (glycolysis inhibition) treatment. Right:  
56 Quantitative analysis of nascent protein puncta in the presence of various drug  
57 treatment combinations for 12 hours. The following drugs were used: FCCP (1  
58  $\mu\text{M}$ ), oligomycin (100 ng/ml), 2DG (3 mM). (n = 20 cells). Scale bar: 40  $\mu\text{m}$ .

59 c, Schematic depicting experimental setup. Mito-killRed was utilized to locally  
60 damage mitochondria and evaluate the influence on protein synthesis in TMs.

61 d, Immunofluorescent imaging after GSCs were co-transfected with a cytoplasmic  
62 ATP reporter (cyto-ATP) and Mito-killRed. The white box denotes the site of laser  
63 stimulation, and the yellow circle indicates the location used for ATP detection.

64 e, The intensity of cyto-ATP was measured via a time course to assess ATP levels  
65 in response to laser stimulation.

66 f, Quantitative analysis of ATP concentration after laser stimulation for 30 minutes  
67 in GSCs. (n = 3).

68 g, GSCs were transfected with GFP and Mito-killRed. The change in the length of  
69 the TM, represented by retraction speed, was measured and quantified. (n = 3).  
70 \*\*, p < 0.01. Scale bar: 20  $\mu\text{m}$ .

71 h, Representative fluorescent images of FASTKD2 (green) and DAPI (blue) nuclei in  
72 GSCs. And Quantitative analysis of immunofluorescence intensity in the GSCs  
73 TM and cell body, Scale bar: 20  $\mu\text{m}$ .

74 Representative of three independent experiments in a-h. Data are presented from  
75 three independent experiments in b and f-h. data are presented as mean  $\pm$  SD.  
76 Student's t-test with p-values for g. One-way ANOVA followed by multiple  
77 comparisons with adjusted p-values for b, f, and h.

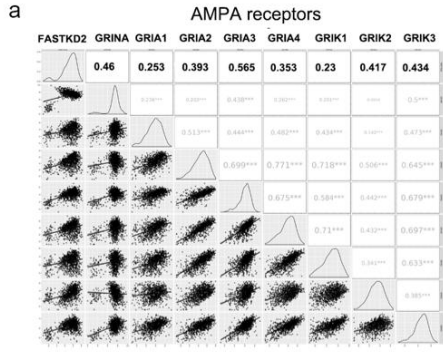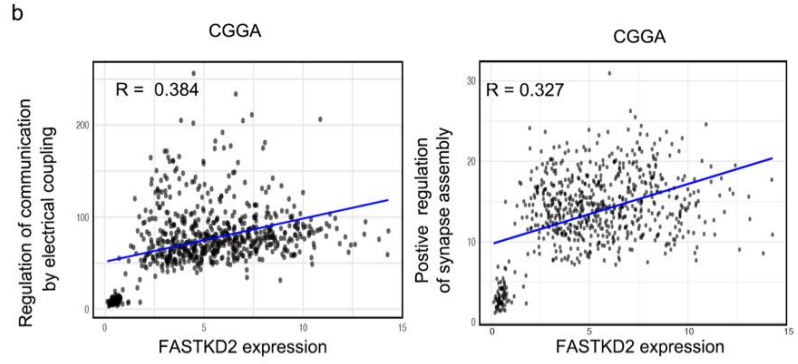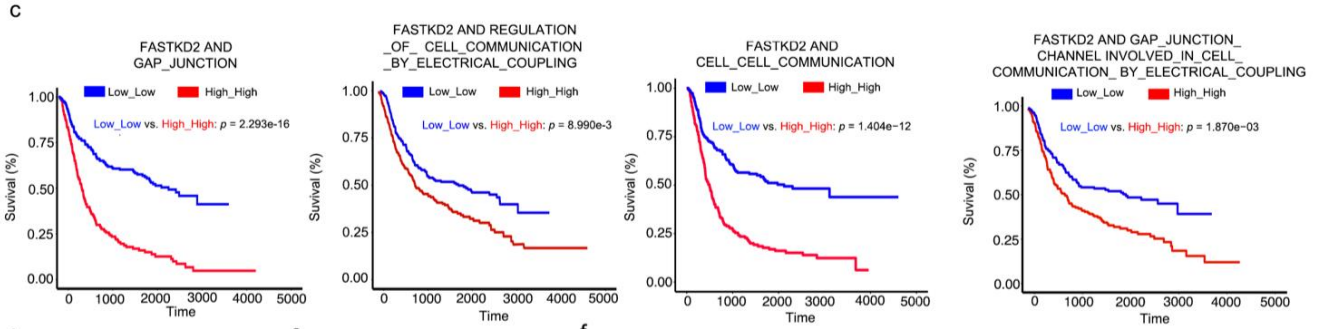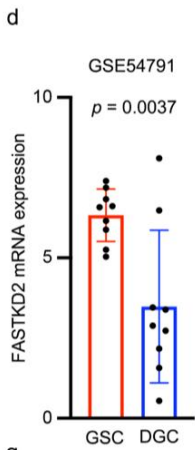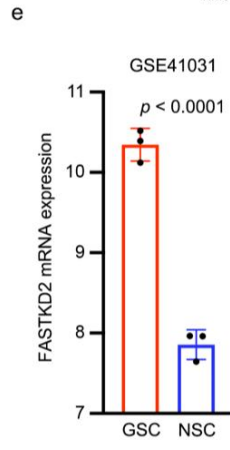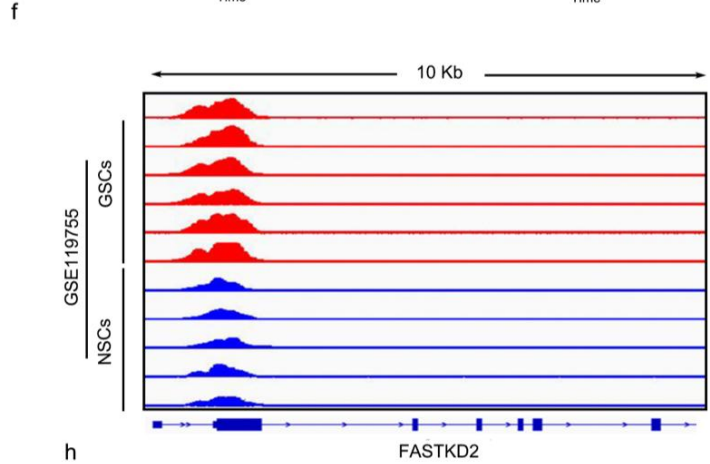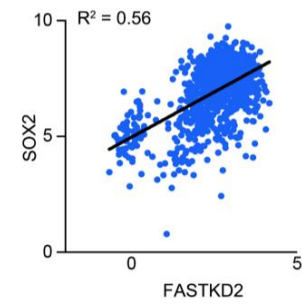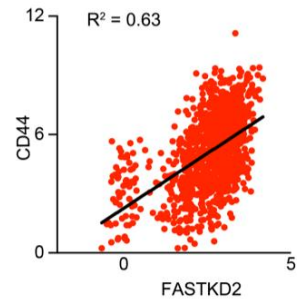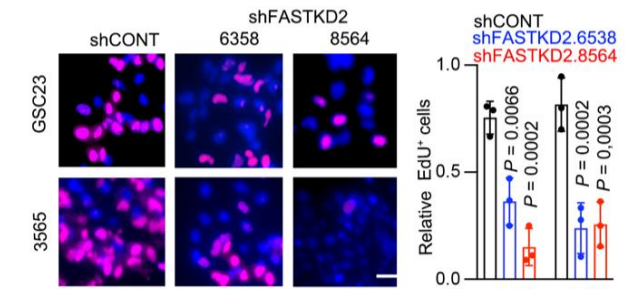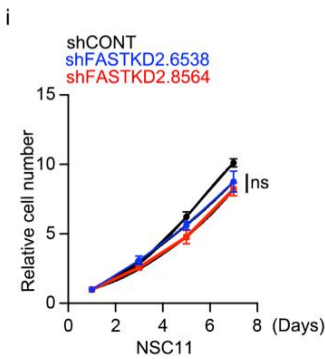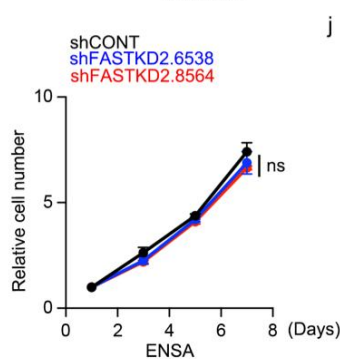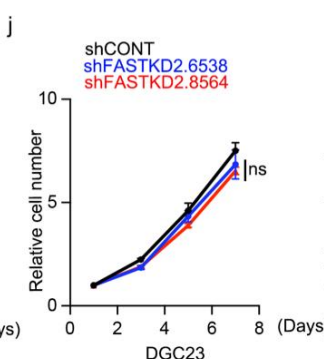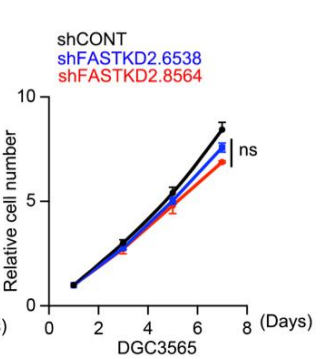

78 **Extended Data Figure 3. FASTKD2 portends poor prognosis in GBM and**  
79 **maintains stemness.**

80 a, The correlation between FASTKD2 expression and AMPA receptors in CGGA  
81 database.

82 b, The correlation between FASTKD2 expression and regulation of communication  
83 related pathways.

84 c, Combined Kaplan–Meier survival analysis of FASTKD2 expression and the  
85 regulation of communication related pathways in the CGGA.

86 d, FASTKD2 expression levels in GSCs and matched DGCs using publicly available  
87 dataset GSE41031. (GSC, n = 8, DGC, n = 9).

88 e, FASTKD2 expression levels in GSCs and NSCs using publicly available dataset  
89 GSE54791. (n = 3).

90 f, H3K27ac ChIP-seq enrichment tracks at FASTKD2 gene loci in GSCs and NSCs  
91 using publicly available dataset GSE119755.

92 g, Pairwise correlation analysis between FASTKD2 and stemness markers (SOX2,  
93 CD44) was investigated using the CGGA database. R2 values indicate the  
94 correlation.

95 h, Representative immunofluorescence images of EdU incorporation assays in  
96 GSC23 and 3565 cells transduced with control shRNA (shCONT) or  
97 FASTKD2-targeting shRNAs (6358 and 8564). EdU (magenta) indicates  
98 proliferating cells, and DAPI (blue) indicates nuclei. Scale bar, 40  $\mu$ m

99 i, Cell viability was measured in NSCs transduced with either shCONT or  
100 shFASTKD2. (n = 3).

101 j, Cell viability was measured in DGCs transduced with either shCONT or  
102 shFASTKD2. (n = 3).

103 Representative of three independent experiments in h. Data are presented from  
104 three independent experiments in i-j. data are presented as mean  $\pm$  SD. Two-tailed  
105 Student's t-test with p values for d, and e. Two-way ANOVA followed by multiple  
106 comparisons with adjusted p-value. ns, not significant. log-rank test for c.

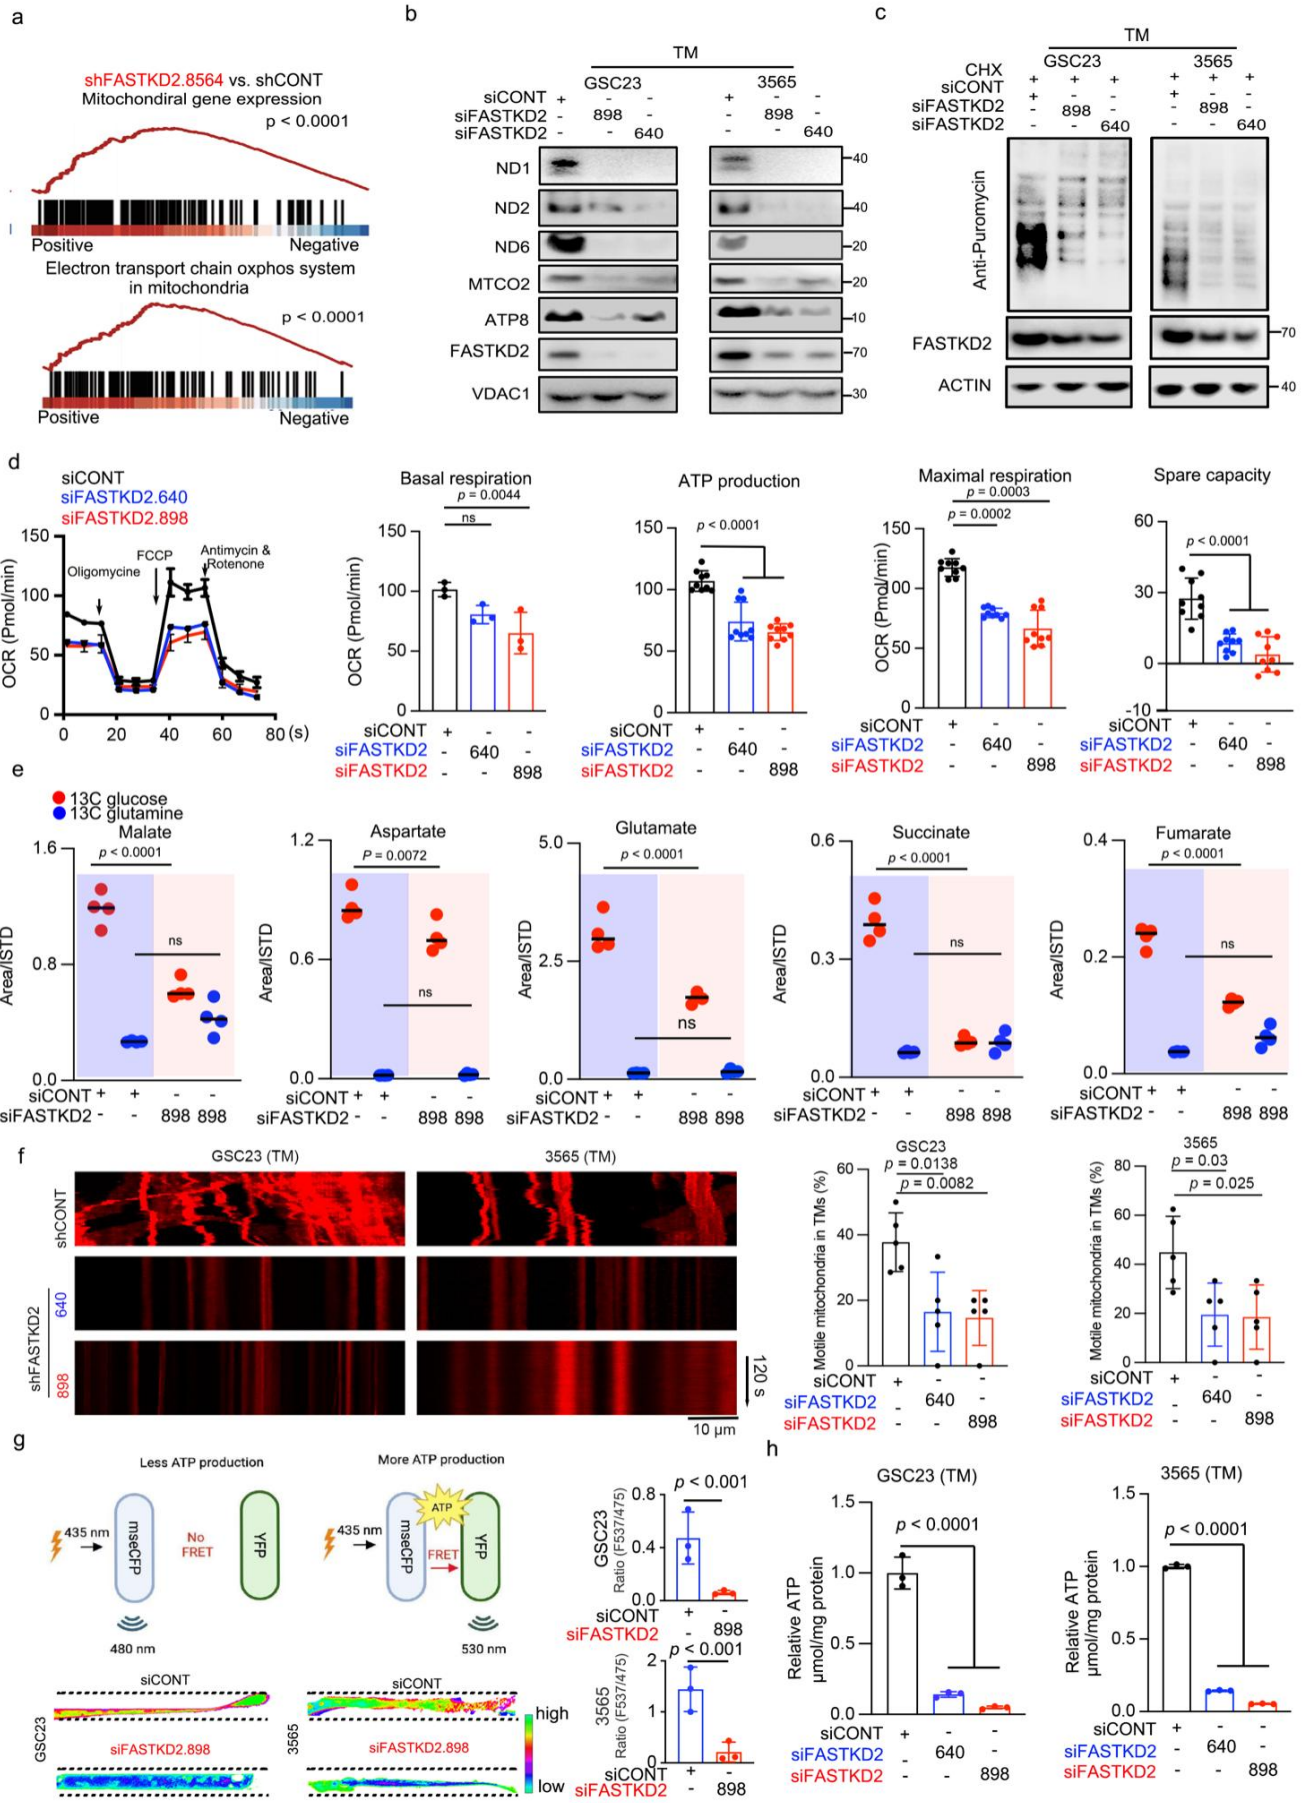

107 **Extended Data Figure 4. FASTKD2 maintains mitochondrial function and ATP**  
108 **production in GSC TMs.**

109 a, Analysis of FASTKD2 immunoprecipitated by polyacrylamide gel electrophoresis  
110 and silver staining.

111 b, Western blot analysis evaluating mitochondrial-related protein expression in  
112 GSCs after FASTKD2 knockdown.

113 c, Mitochondrial protein synthesis in GSCs were assessed in the presence or  
114 absence of FASTKD2 knockdown. Cells were treated with 50µg/ml  
115 cycloheximide (CHX) for 20minutes prior to puromycin treatment for 15minutes.  
116 Purified mitochondrial lysates were probed with anti-puromycin antibody to  
117 measure mitochondrial protein synthesis.

118 d, Real-time measurements and line graph representation of the oxygen  
119 consumption rate (OCR) in GSCs as measured by Seahorse XF96. After basal  
120 OCR was obtained, oligomycin (1 µM) was added to determine proton  
121 leak-linked OCR and calculate ATP-linked OCR. The uncoupler FCCP (1 µM)  
122 was then added, and the maximal OCR was measured. Finally, excess OCR was  
123 obtained after adding antimycin A (1 µM) and rotenone (1 µM) to inhibit the  
124 electron transport chain. (n = 3).

125 e, The metabolite profiling in GSC23 TMs, GSC23 cells treated with siCONT and  
126 siFASTKD2.898 for 48 hours, cells were labeled with [U-<sup>13</sup>C] glucose and [U-<sup>13</sup>C]  
127 glutamine to trace metabolic fluxes. Red and blue dots represent individual  
128 values calculated using [U-<sup>13</sup>C] glucose and [U-<sup>13</sup>C] glutamine, respectively, (n  
129 = 4).

130 f, Kymograph showing the motility of mitochondria labeled with DsRed-mito in  
131 GSC TMs. Scale bars in all panels, 10 µm. Qualification of motility of the  
132 mitochondria labeled with DsRed-mito in GSC TMs (n = 5).

133 g, Left: Schematic drawing of FRET-based ATP probes. Middle: Cytoplasmic ATP  
134 concentration was measured using the ATP sensor ATeam transfected in GSCs  
135 following siFASTKD2 or siCONT treatment. Representative pseudo-colored  
136 images of the ATeam ratio are shown and quantified using a bar graph. (n = 3).

137 h, ATP levels were measured in TMs of GSCs following FASTKD2 knockdown. (n =  
138 3).

139 Representative of two independent experiments in b-c. Data are presented from  
140 more than three independent experiments in d-h. Data are presented as mean  $\pm$   
141 SD. Student's t-test with p values for g, One-way ANOVA followed by multiple  
142 comparisons with adjusted p values for d-f and h.

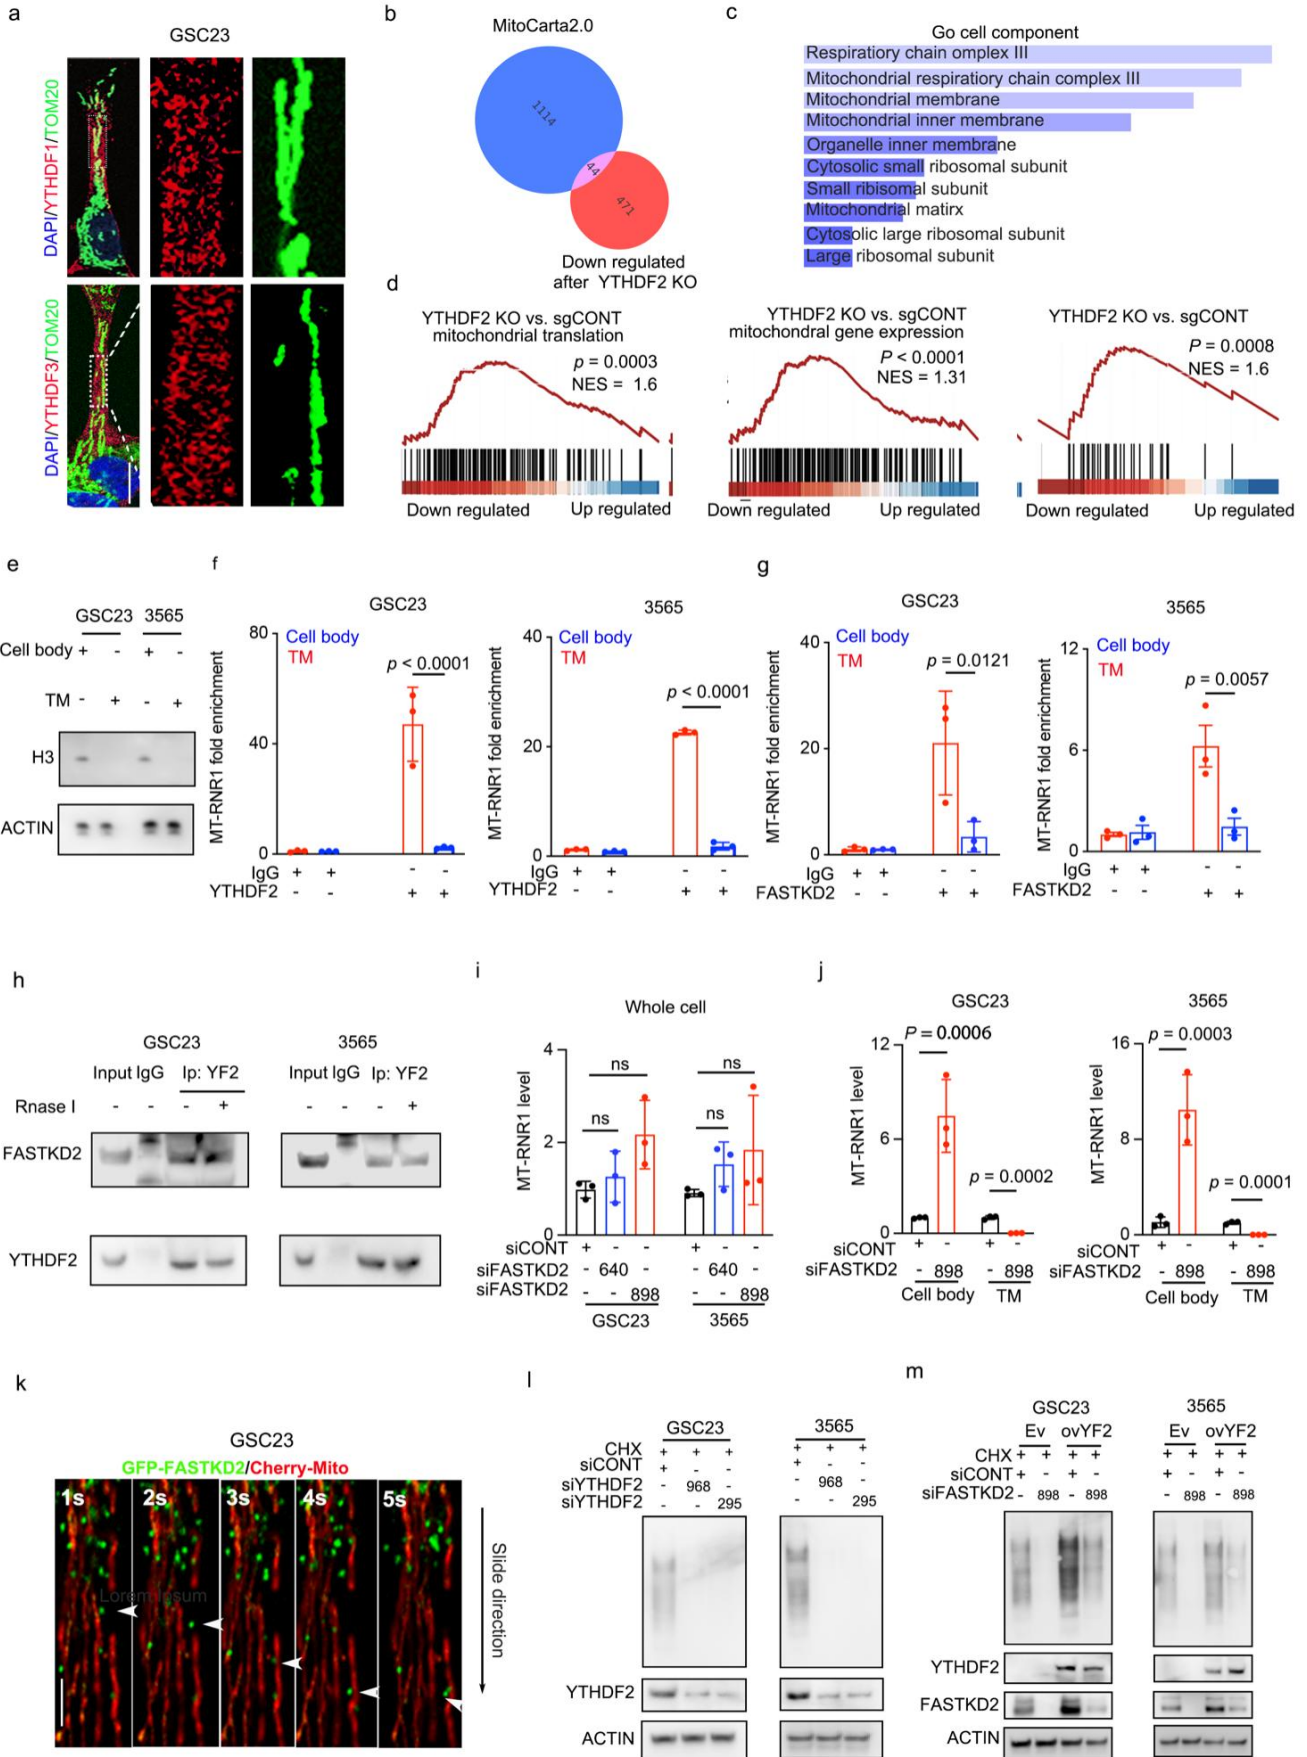

143 **Extended Data Figure 5. FASTKD2 maintenance of mitochondrial function**  
144 **requires YTHDF2 to stabilize MT-RNR1.**

145 a, Representative imaging of the distribution of YTHDF1 (magenta), YTHDF3  
146 (magenta), and TOM20 (green) in GSC23 TM. Scale bar: 20  $\mu$ m.

147 b, Venn diagram illustrating overlapping genes between downregulated genes in  
148 YTHDF2 KO and mitochondria-related genes derived from MitoCarta2.0.

149 c, Functional analysis network of mitochondrial-related genes downregulated in  
150 response to YTHDF2 knockout.

151 d, Gene set enrichment analysis (GSEA) plot indicating enrichment of mitochondrial  
152 translation, mitochondrial ribosome, and mitochondrial gene expression  
153 pathways in sgCONT as compared to sgYTHDF2 in GSCs.

154 e, Western blot analysis of TM and cell body separation.

155 f, RIP-qPCR indicating the interaction between YTHDF2 and MT-RNR1 in  
156 mitochondria isolated from the cell body and TM in GSCs. (n = 3).

157 g, RIP-qPCR indicating the interaction between FASTKD2 and MT-RNR1 in  
158 mitochondria isolated from the cell body and TM in GSCs. (n = 3).

159 h, IP analysis of the interaction between YTHDF2 and FASTKD2 in the presence of  
160 Rnase I treatment.

161 i, Quantification of MT-RNR1 levels in whole cells in the presence or absence of  
162 FASTKD2 knockdown. (n = 3).

163 j, Quantification of MT-RNR1 levels in the cell body and TM in the presence or  
164 absence of FASTKD2 knockdown. (n = 3).

165 k, Time tracking of FASTKD2 along the mitochondrial network in GSC23. Green  
166 represents GFP-FASTKD2 and red represents Cherry-mito. Scale bar: 20  $\mu$ m.

167 l, Western blot analysis of mitochondrial protein synthesis in TMs following  
168 YTHDF2 knockdown.

169 m, Western blot analysis of mitochondrial protein synthesis in TMs following  
170 YTHDF2 overexpression in GSCs.

171 Representative of two independent experiments in e, h l, and m. Data are presented  
172 from three independent experiments in f, g, i and j. Data are presented as mean  $\pm$   
173 SEM. Two-way ANOVA followed by multiple comparisons with adjusted p-values  
174 for f, g, i and j.

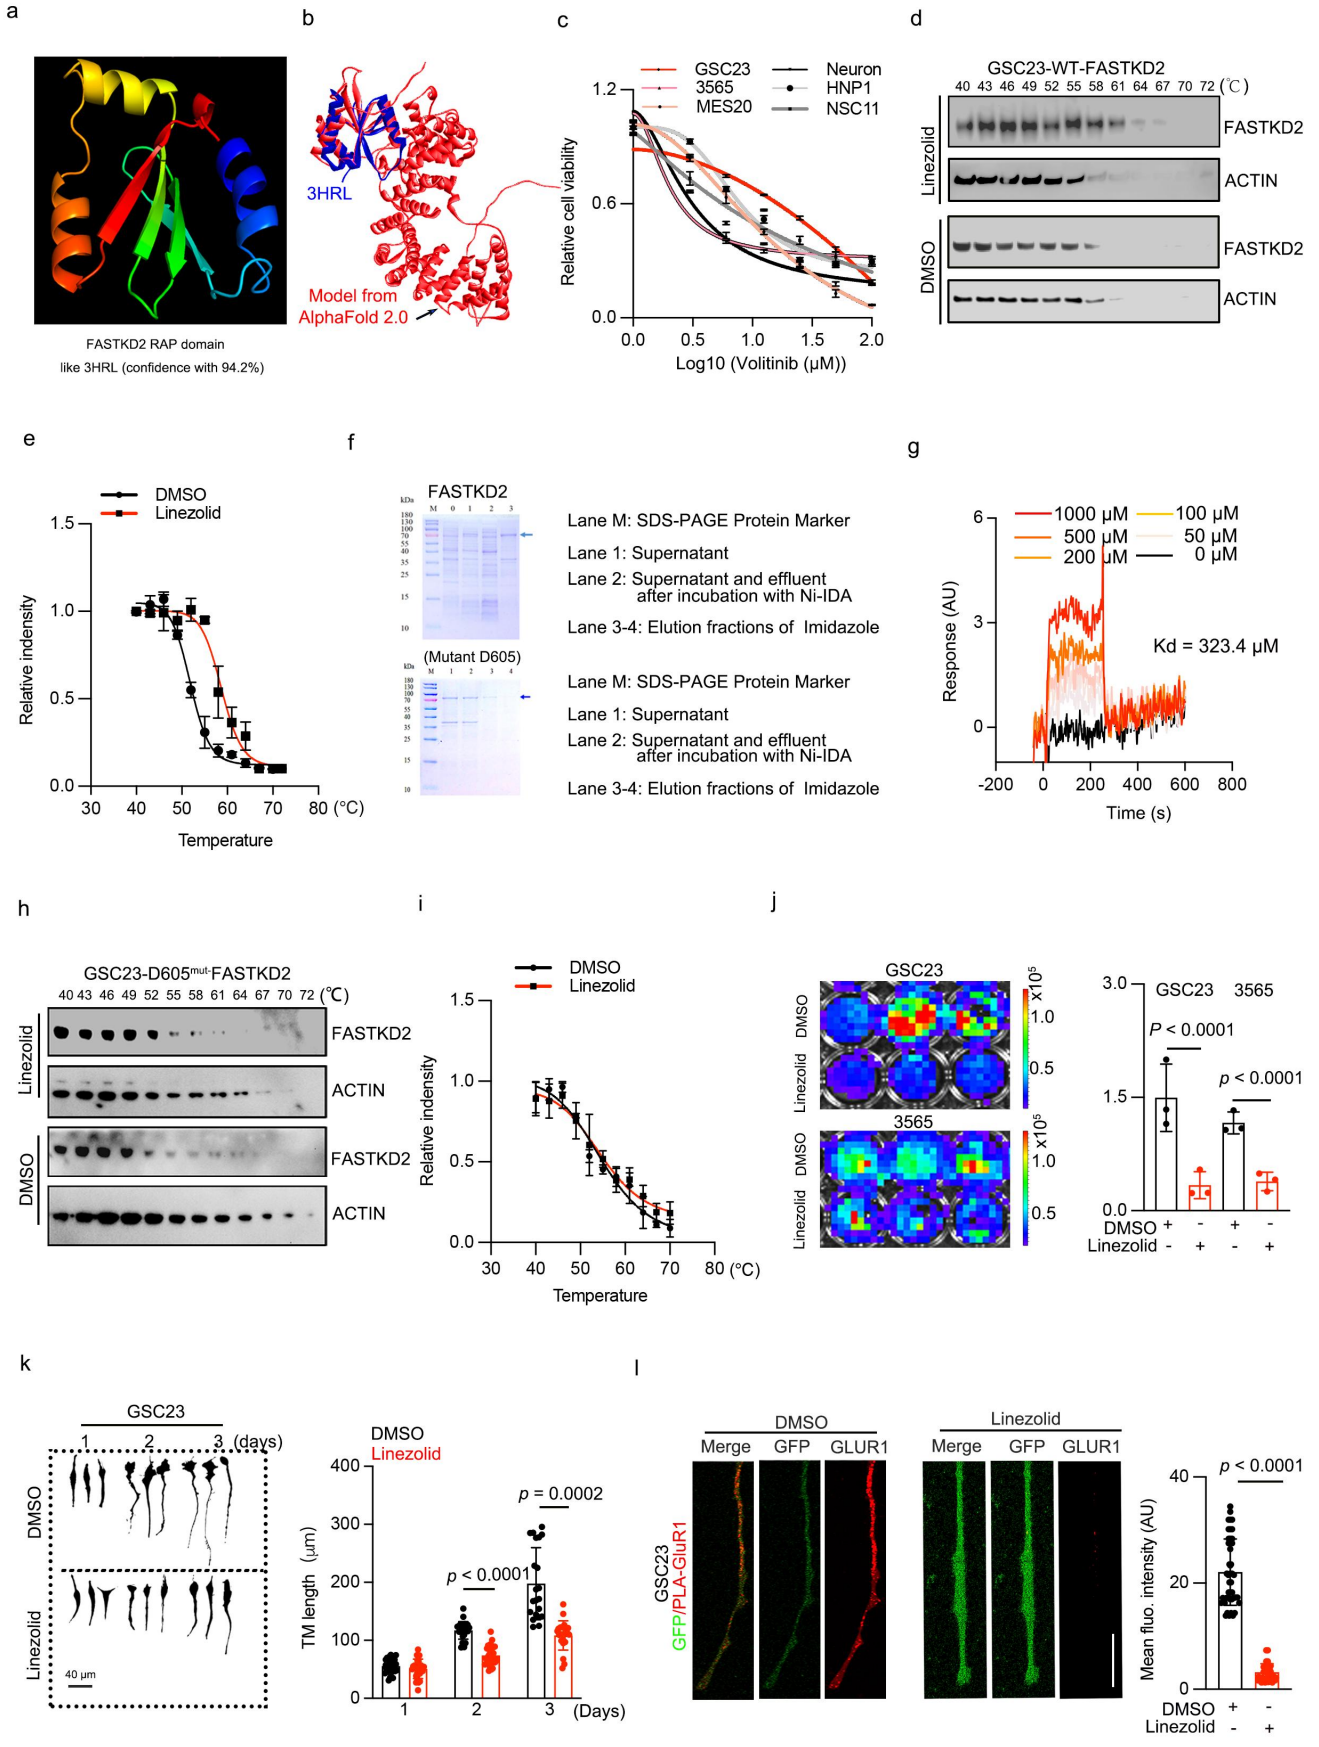

175 **Extended Data Figure 6. Pharmacological targeting FASTKD2 suppresses**  
176 **neuronal-glioma interactions and GSC proliferation**

177 a, Structural modeling of the human FASTKD2 protein compared to known  
178 PD-(D/E)-XK nucleases. Models and structures are shown as a schematic  
179 colored by secondary structure elements.

180 b, Aligned result between 3HRL and the predicted structure (FASTKD2) from  
181 AlphaFold2 using the Discovery Studio software.

182 c, Cell viability was evaluated in various glioma cell lines (GSC23, MES20, 3565),  
183 neural stem cell lines (NSC11, HNP1), and neuron cells upon treatment with  
184 increasing concentrations of Volitinib.

185 d, Cell thermal migration assay showing change in the stability of FASTKD2 in  
186 GSC23 when treated with linezolid at different temperatures.

187 e, Cell thermal migration assay plot to evaluate the binding effect between linezolid  
188 and FASTKD2 under different temperatures.

189 f, Expression, purification, and identification of FASTKD2 (top) and FASTKD2  
190 mutant protein (bottom). The arrow indicates the target protein.

191 g, Surface plasmon resonance assay was performed to detect the binding affinity  
192 between mutant FASTKD2 and linezolid.

193 h, Cell thermal migration assay showing a change in the stability of mutant  
194 FASTKD2 in GSC23 when treated with linezolid at different temperatures.

195 i, Quantification of the binding effect between linezolid and FASTKD2 under  
196 different temperatures.

197 j, GSC23 was transfected with a luciferase reporter to monitor ATP concentration  
198 after Linezolid (100  $\mu$ M) treatment for 72 hours. (n = 3).

199 k, Left: TM length was measured following treatment with linezolid (100  $\mu$ M) or  
200 DMSO control for the indicated time. Right: Quantification of the TM length by  
201 NeuronJ. Data represent mean  $\pm$  SEM (n = 20 - 30). Scale bar: 40  $\mu$ m.

202 l, Left: Representative imaging of the distribution of nascent GluR1 in TM with or  
203 without Linezolid (100  $\mu$ M) treatment. Right: Mean fluorescence intensity  
204 quantification of nascent GluR1 in GSC23 TM. (n = 15).

205 Representative of two independent experiments in d and h. Data are presented from  
206 three independent experiments in

207 l and k. Data are presented as mean  $\pm$ SEM for c, e and i. Student's t-test with  
208 p-values for l. Two-way ANOVA followed by multiple comparisons with adjusted  
209 p-values for j and k.

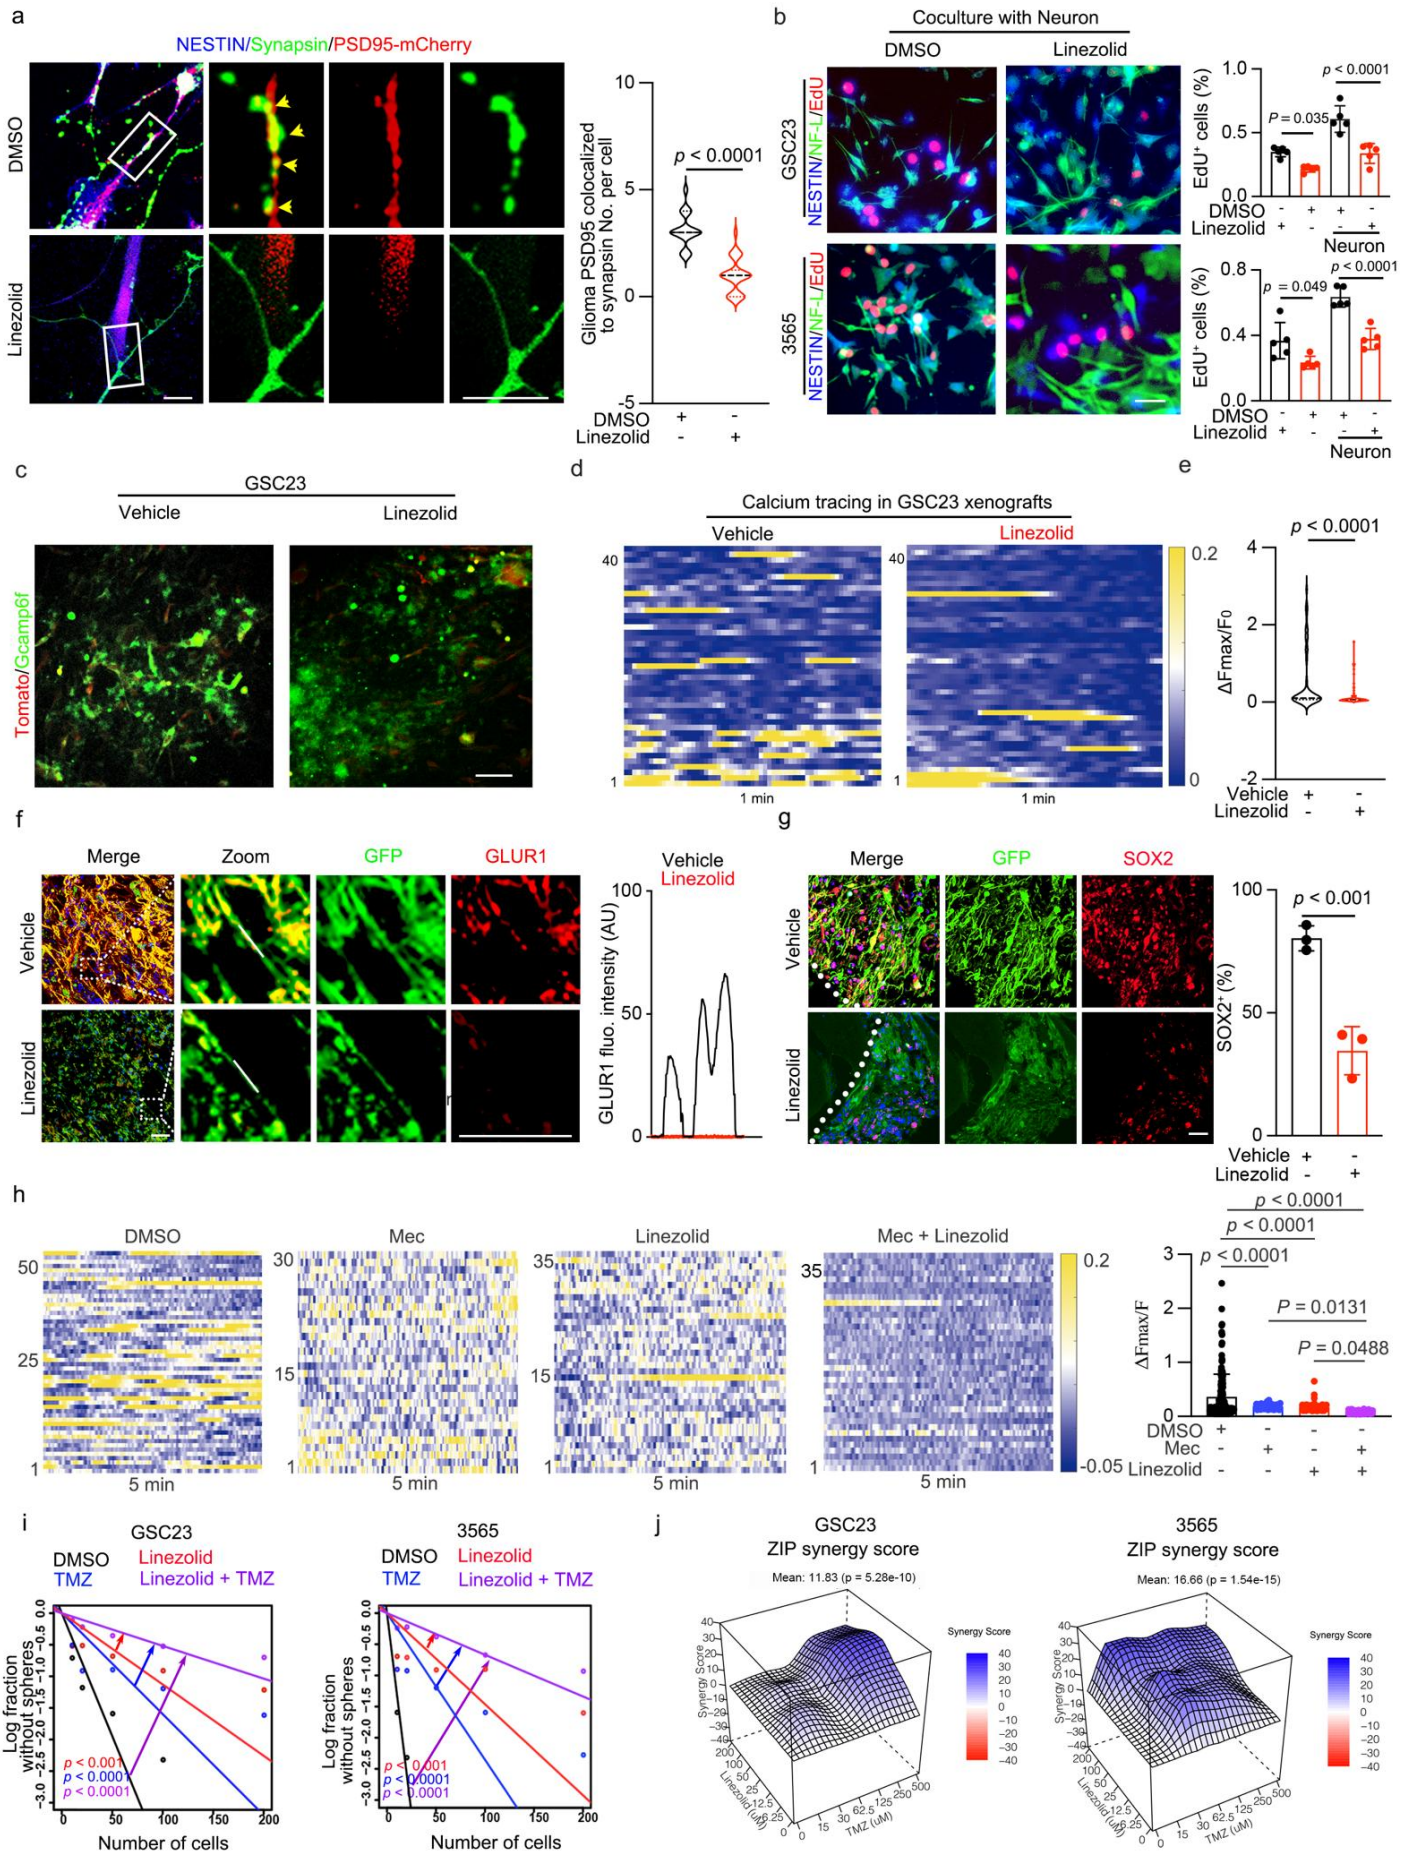

**Extended Data Fig. 7, Dual inhibition of neuron–glioma connectivity causes synergistic decrease in glioblastoma growth.**

- a, Left: Representative images of neuron co-culture with glioma cells with and without linezolid pretreatment for 24 hours. NESTIN (glioma, blue), SYNAPSIN (presynaptic puncta, green) and PSD95 (glioma postsynaptic puncta, red) are labeled. Scale bar: 5 $\mu$ m. Right: Post-synaptic glioma-derived PSD95 puncta colocalized with neuronal pre-synaptic synapsin were quantified. (n = 50).
- b, Representative immunofluorescence images (left) and proliferation index quantification (right; EdU+ cells/Nestin+ cells) of glioma cells cultured alone or with neurons in the presence or absence of linezolid treatment for 72 hours. (n=5 coverslips per group). Scale bar: 50 $\mu$ m.
- c, Representative calcium imaging (120 second time course) of hippocampal slice (n = 3 mice) xenografted with GCaMP6f-expressing glioma with and without linezolid treatment. Scale bar: 50  $\mu$ m.
- d, Heatmap of single-cell Ca<sup>2+</sup> signals over a 1-min time course in vivo under linezolid treatment.
- e, Quantification of the maximal Ca<sup>2+</sup> response ( $\Delta F_{max}/F_0$ ) in GSC23 cells under the linezolid treatment.
- f, Representative immunofluorescence images depicting the downregulated expression of GLUR1 (Red) following linezolid treatment in vivo. Scale bar: 40  $\mu$ m. Right: Quantification the intensity of GLUR1 tumor cells following linezolid treatment.
- g, Representative immunofluorescence images depicting the downregulated expression of SOX2 (red) following linezolid treatment in vivo. Scale bar: 40  $\mu$ m. Right: Quantification of SOX2+ tumor cells following linezolid treatment.
- h, Representative heatmaps of Ca<sup>2+</sup> dynamics in individual cells over a 5-min time course after treatment with linezolid, Mec, or their combination. Right: Quantification of the maximal Ca<sup>2+</sup> response ( $\Delta F_{max}/F_0$ ) in GSC23 cells under the different treatment conditions.
- i, In vitro extreme limiting dilution analysis of GSC tumor sphere formation treated with vehicle control, linezolid (100  $\mu$ M), temozolomide (500  $\mu$ M), or

the combination of linezolid and temozolomide. n=3 independent biological cell cultures.

- j, 3D synergy landscape plots evaluating the synergistic interaction between linezolid and temozolomide (TMZ). The z-axis represents the synergy score, indicating the degree of synergistic activity. The ZIP model was used to evaluate the mean synergy score.

Representative of two independent experiments in a and b. Data are presented from three independent experiments in c and d. Data are presented as mean  $\pm$  SD for b, g, h. Student's t-test with p-values for a, e and g. Two-way ANOVA followed by multiple comparisons with adjusted p-values for b and h. ELDA analysis for i.
