# Supplementary material for: Targeting Tumour Microtubes to Disrupt Glioma Networks
Source: Research Square preprint supplement (doi:10.21203/rs.3.rs-8605748/v1), 2026-04-07
Supplement: Supplementary file 2 [file 51506db789447b11c270e899.xlsx]

## Sheet: Sheet1
siRNA and Recombinant DNA
FASTKD2 shFASTKD2.8654	Sigma-Aldrich	TRCN0000142538
FASTKD2 shFASTKD2.6358	Sigma-Aldrich	TRCN0000140752
FASTKD2 siFASTKD2.898	Sigma-Aldrich	SASI_Hs01_00068223
FASTKD2 siFASTKD2.640	Sigma-Aldrich	SASI_Hs01_00068221
On-targeting control shRNA	Sigma-Aldrich	TRCN0000231489
siRNA Universal Negative Control	Sigma-Aldrich	SIC001
YTHDF2 siYTHDF2.968	Sigma-Aldrich	SASI_Hs01_00133223
YTHDF2 siYTHDF2.295	Sigma-Aldrich	SASI_Hs01_00133220
METTL3 siMETTL3.826	Sigma-Aldrich	SASI_Hs01_00044317
GFP-FASTKD2	Vectorbulilder	VB230418-1531fse
5UTR'-Dendra2-GluR1-3UTR	Vectorbuilder	VB241112-1493ujg
Mito-KillerRed	Genecopoeia	EX-NEG-Lv105
pLV-mitoGFP	Addgene	Plasmid# 44385 (Kitay et al, 2013)
Cherry-Mito	Addgene	Plasmid# 55102 (Olenych et al., 2007)
pHAGE-RSV-tdTomato-2A-GCaMP6f	Addgene	Plasmid# 80317 (Liberti WA et al., 2016)
ATeam1.03-nD/nA/pcDNA3	Addgene	Plasmid# 80317 (Kotera et al., 2010)
Cyto-ATP	Addgene	Plasmid# 8455 (Stewart et al., 2003)
pCI-VSVG	Addgene	Plasmid# 1733 (Garry Nolan lab)
LentiCRISPR v2	Addgene	Plasmid# 52961 (Sanjana et al., 2014)
pLV-mitoDsRed	Addgene	Plasmid# 44386 (Kitay BM et al., 2013)
pLV-eGFP	Addgene	Plasmid# #36083 (Enomoto et al., 2013)
psPAX2	Addgene	Plasmid# 12260 (Didier Trono lab)
pMD2.G	Addgene	Plasmid# 12259 ((Didier Trono lab))
Oligonucleotides (siRNA screening)
CCAAGATCGAGCGAGTGAA	stB0013143A	genOFFTM st-h-MRPS26_001
TCGTGCTGATGGAGCGTTA	stB0013143B	genOFFTM st-h-MRPS26_002
GACTCCCGGAAGAACTACA	stB0013143C	genOFFTM st-h-MRPS26_003
ACCAGAACCTACGCACCTA	stB0003735A	genOFFTM st-h-BID_001
CCTACCCTAGAGACATGGA	stB0003735B	genOFFTM st-h-BID_002
GAGGAGCTTAGCCAGAAAT	stB0003735C	genOFFTM st-h-BID_003
GCACCAAAGTAGTTCTAGA	stB0005099A	genOFFTM st-h-HSPE1_001
TCAACCAGTTAGCGTGAAA	stB0005099B	genOFFTM st-h-HSPE1_002
GTGACATTCTTGGAAAGTA	stB0005099C	genOFFTM st-h-HSPE1_003
GCTACACCCTGCACTATAA	stB0009349A	genOFFTM st-h-TRAP1_001
CTGACAGAGTGGAGGTCTA	stB0009349B	genOFFTM st-h-TRAP1_002
GTTCCACTTCCAAACATGA	stB0009349C	genOFFTM st-h-TRAP1_003
CTGCAGGATTTGACAAGCA	stB0006138A	genOFFTM st-h-DHODH_001
TCAGGAAGGAAACCCTAGA	stB0006138B	genOFFTM st-h-DHODH_002
GGCCAGATTTCAAGACTCT	stB0006138C	genOFFTM st-h-DHODH_003
GAATCCCACTTGGCAAGTT	stB0011206A	genOFFTM st-h-DCXR_001
CAGTGGTGATGACGTCCAT	stB0011206B	genOFFTM st-h-DCXR_002
TCTGCTGAGTGACCGAAGT	stB0011206C	genOFFTM st-h-DCXR_003
AGCAGTGGATCGACAAGTA	stB0017240A	genOFFTM st-h-MMAB_001
GAACGTGGCCAAGTTCTTA	stB0017240B	genOFFTM st-h-MMAB_002
CAAAGATGACCAAGTGTTT	stB0017240C	genOFFTM st-h-MMAB_003
GGACAACACTTTTGCAGAT	stB0005727A	genOFFTM st-h-C1QBP_001
GAGTCTGAATGGAAGGATA	stB0005727B	genOFFTM st-h-C1QBP_002
GTTGGACTGTCATTATCCA	stB0005727C	genOFFTM st-h-C1QBP_003
GGACCGTGATTTACTGCAA	stB0001818A	genOFFTM st-h-LRPPRC_001
GAGACCAGATGTACTACAA	stB0001818B	genOFFTM st-h-LRPPRC_002
CATCGTGACTCTAGGGTTA	stB0001818C	genOFFTM st-h-LRPPRC_003
GCCGCTATAGTCCTGAATT	stB0001825A	genOFFTM st-h-MRPS7_001
AATATGTTCGGGAGCTCAA	stB0001825B	genOFFTM st-h-MRPS7_002
TGAAAAACTGTGAGCCTAT	stB0001825C	genOFFTM st-h-MRPS7_003
CAATGAGTGTGATGAGATA	stB0009976A	genOFFTM st-h-FASTKD2_001
GGGTGTCCTTTAAGAATAA	stB0009976B	genOFFTM st-h-FASTKD2_002
GAGGATTCCTTGCTATGAA	stB0009976C	genOFFTM st-h-FASTKD2_003
ACCGCATCAATGAGATGGT	stB0011952A	genOFFTM st-h-ATAD3A_001
CCAAGAATGCCACGCTTGT	stB0011952B	genOFFTM st-h-ATAD3A_002
GCAACCAACCAGAGCAGTT	stB0011952C	genOFFTM st-h-ATAD3A_003
GAAGAAGCATATACACTTA	stB0007063A	genOFFTM st-h-ME2_001
GCCTTACGATTTCATAGAA	stB0007063B	genOFFTM st-h-ME2_002
GCAGGAATACGGCCTGATA	stB0007063C	genOFFTM st-h-ME2_003
GGCGCTCAGTGACTGAAAA	stB0001394A	genOFFTM st-h-ABCB10_001
CGGTTGGATTTCTCACGAT	stB0001394B	genOFFTM st-h-ABCB10_002
ATGACATCCGTCAGCTAAA	stB0001394C	genOFFTM st-h-ABCB10_003
GTGTCAGAATTTCCATATA	stB0006513A	genOFFTM st-h-GPD2_001
GCAGTTATGTCCTCAGCAA	stB0006513B	genOFFTM st-h-GPD2_002
GAGTGGCCTTATTACTATA	stB0006513C	genOFFTM st-h-GPD2_003
GAAGGAATGTCCGGTGAAA	stB0012128A	genOFFTM st-h-TRMT1_001
GCAGGCTGCTTCAGAACAA	stB0012128B	genOFFTM st-h-TRMT1_002
GGCCTACGTTCCATTCGAT	stB0012128C	genOFFTM st-h-TRMT1_003
GGACAACAATGTCCGCAGA	stB0005000A	genOFFTM st-h-ctrl_001
GAGTTGTGATGAGGAAGGA	stB0005000B	genOFFTM st-h-ctrl_002
GTTGGTACTAGAGATTATCA	stB0005000C	genOFFTM st-h-ctrl_003
ChIRP probes
TGACCGCGGTGGCTGGCACG	12MT-RNR1 probe 1	IDT
AGATGGCGGTATATAGGCTG	12MT-RNR1 probe 2	IDT
TTGAGGAGGGTGACGGGCGGTG	12MT-RNR1 probe 3	IDT
RT-qPCR oligonucleotides
GTAACCCGTTGAACCCCATT	18s-F	IDT
CCATCCAATCGGTAGTAGCG	18s-R	IDT
GACACCTTGCCTAGCCACAC	12S-F	IDT
GGCTGGCACGAAATTTACCA	12S-R	IDT
AATTTCGGTTGGGGTGACCT	16S-F	IDT
AGGATTGCGCTGTTATCCCT	16S-R	IDT
FISH probe for the 12S MT-RNR1
5′Cy3_TGGCTGGCACGAAATTGACCAACCCTGGGGTTAGTATAGCTTAGTTAAAC-3′		IDT
