# Supplementary material for: Targeting Tumour Microtubes to Disrupt Glioma Networks
Source: Research Square preprint supplement (doi:10.21203/rs.3.rs-8605748/v1), 2026-04-07
Supplement: Supplementary file 3 [file d0cc75a201b2d94574787b1d.xlsx]

## Sheet: 336 genes
NDUFS6
ECHS1
TKT
COX7A2L
SLC25A3
RPS18
CYCS
PNPT1
NDUFAF4
COX15
MRPL45
COX6C
MRPL1
PTCD3
ECH1
GRPEL1
MACROD1
ALDH3A2
ALDH18A1
ATAD1
NDUFA8
YME1L1
MCU
NDUFS4
TIMM22
TOMM34
ELAC2
UQCRC1
SAMM50
LDHB
TMEM14C
PRDX4
HINT3
L2HGDH
MRPL15
IMMT
PXMP2
LACTB2
ACO2
MRPS24
OPA1
MRPL57
GOT2
NDUFA13
MTHFD1
FTH1
ALDH6A1
C1QBP
TIMM17A
DLST
PARK7
MPC2
RARS2
ACADVL
FDX1
FIS1
BCS1L
SCCPDH
GPX4
MRPS9
FASTKD2
NDUFAF1
UQCRQ
CRAT
TUFM
DHRS7B
TXNDC12
TOMM22
ACAA2
MCAT
MRPL9
MRPL37
NDUFV2
FARS2
TMEM205
SFXN3
PEX11B
ACOX3
SLC25A15
FKBP8
SNAP29
SLC25A40
MCCC1
HEBP1
ME2
MRPS10
TRMT1
TFAM
ACADM
EMC2
SFXN1
GHITM
NDUFB7
CLIC4
AASS
FASTKD5
SLC25A4
CYB5B
SDHAF2
MRPL13
MRPL46
SOD1
CBR3
SLC25A17
POLDIP2
NDUFV1
TARS2
APOOL
MRPL14
FAHD2A
DTYMK
RPL34
TIMM23
QTRT1
SLC25A11
TMEM126A
BCAT2
MRPS31
NT5DC2
ARF5
HSPE1
MTHFD1L
RHOT2
PMPCB
CLPX
HADHB
MPV17
TST
MRPL27
CYB5R3
NFS1
MICU2
RDH14
PTGES2
ABHD10
GLS
SCO2
RPL35A
PLGRKT
DCXR
CHCHD6
CAT
CPOX
MRPS21
CPS1
GUK1
PTRH2
ABCB6
LAP3
MRPS6
HADHA
IDH1
MRPL23
HIBADH
PSMA6
SUCLG2
PHB
CYB5A
GAPDH
GPX1
PYCR2
HIGD2A
MTX2
MTCH2
HINT1
SFXN5
LACTB
MRPS18B
ACSL4
SCO1
NDUFA5
SDHA
UQCRC2
C8orf82
DARS2
CLPB
SUPV3L1
RPL10A
BID
COX5A
NDUFA6
TRMT61B
SDHB
AK3
FASN
MRPS14
PRDX6
ACACA
LYPLA1
ACAT1
YARS2
MRPS34
DAP3
MDH1
MRPL19
SLC25A1
SLC25A5
SLC25A32
MRPL24
AFG3L2
MGST3
NDUFS8
DDAH1
MRPL47
ACOX1
GOLPH3
IDH2
MRPL48
GPI
MRPL28
LETM1
SND1
NIPSNAP1
CS
COX17
MMAB
C12orf10
PPTC7
GRSF1
EARS2
SLC25A22
MRPS7
MTHFD2
MRPS33
UQCRFS1
AKR7A2
DBT
HIGD1A
SPR
CYC1
CMC1
ALDH1B1
NDUFA4
NDUFB5
SLIRP
HK1
LRPPRC
ACO1
CISD2
ALDH7A1
VDAC1
MRPL17
MRPS26
BCL2L13
MRPS30
COA1
ATAD3A
ECI2
MCCC2
CPT2
MRPL44
SUCLG1
GLUD1
ACSS1
PGAM5
RPIA
PRDX3
CHCHD3
BDH1
MRPL3
ACAD9
TFB2M
COX6B1
NUCB2
FPGS
HIBCH
AK4
NLN
HSPA9
HCCS
RPS15A
SPTLC2
TSPO
MRPL39
HINT2
MGME1
ETHE1
ABCB10
HK2
MRPL2
GADD45GIP1
MRPS23
ABAT
THNSL1
TIMMDC1
SLC25A6
MRPS27
MRPL49
MRPL40
ACAD10
ACSF3
COX5B
PRDX2
MRPS2
TIMM44
MRPL21
FAM162A
PAICS
NIT2
GPD2
GCAT
GSTO1
TIMM13
NDUFS5
CISD1
NDUFA9
NNT
TIMM21
KRT5
MRPL16
NUDT5
P4HB
COX4I1
TRMT10C
TACO1
DLAT
LARS2
FUNDC2
NME3
SSBP1
ECI1
DHODH
RPS14
ATIC
TOMM7
CLPP
CCDC58
PNPO
FUNDC1
TRAP1
MRPL53
GARS
BCKDHB
NDUFB9
PDE12
NADK2

## Sheet: 16 genes
ABCB10
ATAD3A
BID
C1QBP
DCXR
DHODH
FASTKD2
GPD2
HSPE1
LRPPRC
ME2
MMAB
MRPS26
MRPS7
TRAP1
TRMT1
