# Supplementary material for: Targeting Tumour Microtubes to Disrupt Glioma Networks
Source: Research Square preprint supplement (doi:10.21203/rs.3.rs-8605748/v1), 2026-04-07
Supplement: Supplementary file 4 [file f36999c941614ffa9f01451d.xlsx]

## Sheet: Proteomics in TMs
Protein	Entry Name	Gene	Protein Length	Description	Indistinguishable Proteins	Protein Probability	Top Peptide Probability	Combined Total Peptides	23_Spectral Count
P63261	P63261 ACTG_HUMAN Actin, cytoplasmic 2 OS=Homo sapiens OX=9606 GN=ACTG1 PE=1 SV=1	ACTG1	375	ACTG_HUMAN		1	0.999	50	891
P04264	P04264 K2C1_HUMAN Keratin, type II cytoskeletal 1 OS=Homo sapiens OX=9606 GN=KRT1 PE=1 SV=6	KRT1	644	K2C1_HUMAN		1	0.999	92	286
P13645	P13645 K1C10_HUMAN Keratin, type I cytoskeletal 10 OS=Homo sapiens OX=9606 GN=KRT10 PE=1 SV=6	KRT10	584	K1C10_HUMAN		1	0.999	66	318
P35527	P35527 K1C9_HUMAN Keratin, type I cytoskeletal 9 OS=Homo sapiens OX=9606 GN=KRT9 PE=1 SV=3	KRT9	623	K1C9_HUMAN		1	0.999	68	158
P35908	P35908 K22E_HUMAN Keratin, type II cytoskeletal 2 epidermal OS=Homo sapiens OX=9606 GN=KRT2 PE=1 SV=2	KRT2	639	K22E_HUMAN		1	0.999	93	129
P02768	P02768 ALBU_HUMAN Serum albumin OS=Homo sapiens OX=9606 GN=ALB PE=1 SV=2	ALB	609	ALBU_HUMAN		1	0.999	35	46
P78527	P78527 PRKDC_HUMAN DNA-dependent protein kinase catalytic subunit OS=Homo sapiens OX=9606 GN=PRKDC PE=1 SV=3	PRKDC	4128	PRKDC_HUMAN		1	0.999	158	2
P08670	P08670 VIME_HUMAN Vimentin OS=Homo sapiens OX=9606 GN=VIM PE=1 SV=4	VIM	466	VIME_HUMAN		1	0.999	69	902
P07437	P07437 TBB5_HUMAN Tubulin beta chain OS=Homo sapiens OX=9606 GN=TUBB PE=1 SV=2	TUBB	444	TBB5_HUMAN		1	0.999	29	342
P68431	P68431 H31_HUMAN Histone H3.1 OS=Homo sapiens OX=9606 GN=HIST1H3A PE=1 SV=2	HIST1H3A	136	H31_HUMAN		1	0.999	17	51
P04406	P04406 G3P_HUMAN Glyceraldehyde-3-phosphate dehydrogenase OS=Homo sapiens OX=9606 GN=GAPDH PE=1 SV=3	GAPDH	335	G3P_HUMAN		1	0.999	28	463
P08238	P08238 HS90B_HUMAN Heat shock protein HSP 90-beta OS=Homo sapiens OX=9606 GN=HSP90AB1 PE=1 SV=4	HSP90AB1	724	HS90B_HUMAN		1	0.999	59	195
P13639	P13639 EF2_HUMAN Elongation factor 2 OS=Homo sapiens OX=9606 GN=EEF2 PE=1 SV=4	EEF2	858	EF2_HUMAN		1	0.999	56	168
P49327	P49327 FAS_HUMAN Fatty acid synthase OS=Homo sapiens OX=9606 GN=FASN PE=1 SV=3	FASN	2511	FAS_HUMAN		1	0.999	89	9
P06576	P06576 ATPB_HUMAN ATP synthase subunit beta, mitochondrial OS=Homo sapiens OX=9606 GN=ATP5F1B PE=1 SV=3	ATP5F1B	529	ATPB_HUMAN		1	0.999	31	173
P02533	P02533 K1C14_HUMAN Keratin, type I cytoskeletal 14 OS=Homo sapiens OX=9606 GN=KRT14 PE=1 SV=4	KRT14	472	K1C14_HUMAN		1	0.999	59	49
P62805	P62805 H4_HUMAN Histone H4 OS=Homo sapiens OX=9606 GN=HIST1H4A PE=1 SV=2	HIST1H4A	103	H4_HUMAN		1	0.999	23	35
P12277	P12277 KCRB_HUMAN Creatine kinase B-type OS=Homo sapiens OX=9606 GN=CKB PE=1 SV=1	CKB	381	KCRB_HUMAN		1	0.999	28	306
P39023	P39023 RL3_HUMAN 60S ribosomal protein L3 OS=Homo sapiens OX=9606 GN=RPL3 PE=1 SV=2	RPL3	403	RL3_HUMAN		1	0.999	29	59
P13647	P13647 K2C5_HUMAN Keratin, type II cytoskeletal 5 OS=Homo sapiens OX=9606 GN=KRT5 PE=1 SV=3	KRT5	590	K2C5_HUMAN		1	0.999	73	61
P62736	P62736 ACTA_HUMAN Actin, aortic smooth muscle OS=Homo sapiens OX=9606 GN=ACTA2 PE=1 SV=1	ACTA2	377	ACTA_HUMAN		1	0.999	35	100
Q00839	Q00839 HNRPU_HUMAN Heterogeneous nuclear ribonucleoprotein U OS=Homo sapiens OX=9606 GN=HNRNPU PE=1 SV=6	HNRNPU	825	HNRPU_HUMAN	Q00839-2	1	0.999	33	39
P05141	P05141 ADT2_HUMAN ADP/ATP translocase 2 OS=Homo sapiens OX=9606 GN=SLC25A5 PE=1 SV=7	SLC25A5	298	ADT2_HUMAN		1	0.999	29	145
P07900-2	P07900-2 HS90A_HUMAN Isoform 2 of Heat shock protein HSP 90-alpha OS=Homo sapiens OX=9606 GN=HSP90AA1	HSP90AA1	854	HS90A_HUMAN		1	0.999	62	118
P42704	P42704 LPPRC_HUMAN Leucine-rich PPR motif-containing protein, mitochondrial OS=Homo sapiens OX=9606 GN=LRPPRC PE=1 SV=3	LRPPRC	1394	LPPRC_HUMAN		1	0.999	66	47
P11021	P11021 BIP_HUMAN Endoplasmic reticulum chaperone BiP OS=Homo sapiens OX=9606 GN=HSPA5 PE=1 SV=2	HSPA5	654	BIP_HUMAN		1	0.999	42	93
P62807	P62807 H2B1C_HUMAN Histone H2B type 1-C/E/F/G/I OS=Homo sapiens OX=9606 GN=HIST1H2BC PE=1 SV=4	HIST1H2BC	126	H2B1C_HUMAN		1	0.999	23	32
P11216	P11216 PYGB_HUMAN Glycogen phosphorylase, brain form OS=Homo sapiens OX=9606 GN=PYGB PE=1 SV=5	PYGB	843	PYGB_HUMAN		1	0.999	42	41
P08779	P08779 K1C16_HUMAN Keratin, type I cytoskeletal 16 OS=Homo sapiens OX=9606 GN=KRT16 PE=1 SV=4	KRT16	473	K1C16_HUMAN		1	0.999	57	24
P38646	P38646 GRP75_HUMAN Stress-70 protein, mitochondrial OS=Homo sapiens OX=9606 GN=HSPA9 PE=1 SV=2	HSPA9	679	GRP75_HUMAN		1	0.999	35	67
Q92616	Q92616 GCN1_HUMAN eIF-2-alpha kinase activator GCN1 OS=Homo sapiens OX=9606 GN=GCN1 PE=1 SV=6	GCN1	2671	GCN1_HUMAN		1	0.999	75	3
Q04917	Q04917 1433F_HUMAN 14-3-3 protein eta OS=Homo sapiens OX=9606 GN=YWHAH PE=1 SV=4	YWHAH	246	1433F_HUMAN		1	0.999	19	54
Q6FI13	Q6FI13 H2A2A_HUMAN Histone H2A type 2-A OS=Homo sapiens OX=9606 GN=HIST2H2AA3 PE=1 SV=3	HIST2H2AA3	130	H2A2A_HUMAN		1	0.999	16	37
P13010	P13010 XRCC5_HUMAN X-ray repair cross-complementing protein 5 OS=Homo sapiens OX=9606 GN=XRCC5 PE=1 SV=3	XRCC5	732	XRCC5_HUMAN		1	0.999	42	71
P35232	P35232 PHB_HUMAN Prohibitin OS=Homo sapiens OX=9606 GN=PHB PE=1 SV=1	PHB	272	PHB_HUMAN		1	0.999	20	93
P62701	P62701 RS4X_HUMAN 40S ribosomal protein S4, X isoform OS=Homo sapiens OX=9606 GN=RPS4X PE=1 SV=2	RPS4X	263	RS4X_HUMAN		1	0.999	21	56
P14625	P14625 ENPL_HUMAN Endoplasmin OS=Homo sapiens OX=9606 GN=HSP90B1 PE=1 SV=1	HSP90B1	803	ENPL_HUMAN		1	0.999	59	103
Q00610	Q00610 CLH1_HUMAN Clathrin heavy chain 1 OS=Homo sapiens OX=9606 GN=CLTC PE=1 SV=5	CLTC	1675	CLH1_HUMAN	Q00610-2	1	0.999	63	21
P36578	P36578 RL4_HUMAN 60S ribosomal protein L4 OS=Homo sapiens OX=9606 GN=RPL4 PE=1 SV=5	RPL4	427	RL4_HUMAN		1	0.999	24	51
Q9Y490	Q9Y490 TLN1_HUMAN Talin-1 OS=Homo sapiens OX=9606 GN=TLN1 PE=1 SV=3	TLN1	2541	TLN1_HUMAN		1	0.999	70	8
P69905	P69905 HBA_HUMAN Hemoglobin subunit alpha OS=Homo sapiens OX=9606 GN=HBA1 PE=1 SV=2	HBA1	142	HBA_HUMAN		1	0.999	10	1
P26038	P26038 MOES_HUMAN Moesin OS=Homo sapiens OX=9606 GN=MSN PE=1 SV=3	MSN	577	MOES_HUMAN		1	0.999	36	66
P62424	P62424 RL7A_HUMAN 60S ribosomal protein L7a OS=Homo sapiens OX=9606 GN=RPL7A PE=1 SV=2	RPL7A	266	RL7A_HUMAN		1	0.999	20	55
P19338	P19338 NUCL_HUMAN Nucleolin OS=Homo sapiens OX=9606 GN=NCL PE=1 SV=3	NCL	710	NUCL_HUMAN		1	0.999	27	48
P63241	P63241 IF5A1_HUMAN Eukaryotic translation initiation factor 5A-1 OS=Homo sapiens OX=9606 GN=EIF5A PE=1 SV=2	EIF5A	154	IF5A1_HUMAN	P63241-2	1	0.999	15	40
P00558	P00558 PGK1_HUMAN Phosphoglycerate kinase 1 OS=Homo sapiens OX=9606 GN=PGK1 PE=1 SV=3	PGK1	417	PGK1_HUMAN		1	0.999	33	116
P63244	P63244 RACK1_HUMAN Receptor of activated protein C kinase 1 OS=Homo sapiens OX=9606 GN=RACK1 PE=1 SV=3	RACK1	317	RACK1_HUMAN		1	0.999	20	39
P12268	P12268 IMDH2_HUMAN Inosine-5'-monophosphate dehydrogenase 2 OS=Homo sapiens OX=9606 GN=IMPDH2 PE=1 SV=2	IMPDH2	514	IMDH2_HUMAN		1	0.999	24	36
P22087	P22087 FBRL_HUMAN rRNA 2'-O-methyltransferase fibrillarin OS=Homo sapiens OX=9606 GN=FBL PE=1 SV=2	FBL	321	FBRL_HUMAN		1	0.999	16	11
P62979	P62979 RS27A_HUMAN Ubiquitin-40S ribosomal protein S27a OS=Homo sapiens OX=9606 GN=RPS27A PE=1 SV=2	RPS27A	156	RS27A_HUMAN		1	0.999	12	43
P17987	P17987 TCPA_HUMAN T-complex protein 1 subunit alpha OS=Homo sapiens OX=9606 GN=TCP1 PE=1 SV=1	TCP1	556	TCPA_HUMAN		1	0.999	31	54
P32969	P32969 RL9_HUMAN 60S ribosomal protein L9 OS=Homo sapiens OX=9606 GN=RPL9 PE=1 SV=1	RPL9	192	RL9_HUMAN		1	0.999	13	39
O00571	O00571 DDX3X_HUMAN ATP-dependent RNA helicase DDX3X OS=Homo sapiens OX=9606 GN=DDX3X PE=1 SV=3	DDX3X	662	DDX3X_HUMAN		1	0.999	27	20
Q16658	Q16658 FSCN1_HUMAN Fascin OS=Homo sapiens OX=9606 GN=FSCN1 PE=1 SV=3	FSCN1	493	FSCN1_HUMAN		1	0.999	28	70
P11586	P11586 C1TC_HUMAN C-1-tetrahydrofolate synthase, cytoplasmic OS=Homo sapiens OX=9606 GN=MTHFD1 PE=1 SV=3	MTHFD1	935	C1TC_HUMAN		1	0.999	46	30
Q7KZF4	Q7KZF4 SND1_HUMAN Staphylococcal nuclease domain-containing protein 1 OS=Homo sapiens OX=9606 GN=SND1 PE=1 SV=1	SND1	910	SND1_HUMAN		1	0.999	37	19
P62241	P62241 RS8_HUMAN 40S ribosomal protein S8 OS=Homo sapiens OX=9606 GN=RPS8 PE=1 SV=2	RPS8	208	RS8_HUMAN		1	0.999	13	31
P42765	P42765 THIM_HUMAN 3-ketoacyl-CoA thiolase, mitochondrial OS=Homo sapiens OX=9606 GN=ACAA2 PE=1 SV=2	ACAA2	397	THIM_HUMAN		1	0.999	16	6
P49411	P49411 EFTU_HUMAN Elongation factor Tu, mitochondrial OS=Homo sapiens OX=9606 GN=TUFM PE=1 SV=2	TUFM	452	EFTU_HUMAN		1	0.999	28	48
P41252	P41252 SYIC_HUMAN Isoleucine--tRNA ligase, cytoplasmic OS=Homo sapiens OX=9606 GN=IARS PE=1 SV=2	IARS	1262	SYIC_HUMAN		1	0.999	42	3
P22392-2	P22392-2 NDKB_HUMAN Isoform 3 of Nucleoside diphosphate kinase B OS=Homo sapiens OX=9606 GN=NME2	NME2	267	NDKB_HUMAN		1	0.999	19	81
P18124	P18124 RL7_HUMAN 60S ribosomal protein L7 OS=Homo sapiens OX=9606 GN=RPL7 PE=1 SV=1	RPL7	248	RL7_HUMAN		1	0.999	19	36
P50395	P50395 GDIB_HUMAN Rab GDP dissociation inhibitor beta OS=Homo sapiens OX=9606 GN=GDI2 PE=1 SV=2	GDI2	445	GDIB_HUMAN		1	0.999	35	86
P13667	P13667 PDIA4_HUMAN Protein disulfide-isomerase A4 OS=Homo sapiens OX=9606 GN=PDIA4 PE=1 SV=2	PDIA4	645	PDIA4_HUMAN		1	0.999	44	65
P33991	P33991 MCM4_HUMAN DNA replication licensing factor MCM4 OS=Homo sapiens OX=9606 GN=MCM4 PE=1 SV=5	MCM4	863	MCM4_HUMAN		1	0.999	40	27
P07195	P07195 LDHB_HUMAN L-lactate dehydrogenase B chain OS=Homo sapiens OX=9606 GN=LDHB PE=1 SV=2	LDHB	334	LDHB_HUMAN		1	0.999	27	132
P61978-3	P61978-3 HNRPK_HUMAN Isoform 3 of Heterogeneous nuclear ribonucleoprotein K OS=Homo sapiens OX=9606 GN=HNRNPK	HNRNPK	463	HNRPK_HUMAN	P61978-2	1	0.999	24	68
P15880	P15880 RS2_HUMAN 40S ribosomal protein S2 OS=Homo sapiens OX=9606 GN=RPS2 PE=1 SV=2	RPS2	293	RS2_HUMAN		1	0.999	18	54
O95373	O95373 IPO7_HUMAN Importin-7 OS=Homo sapiens OX=9606 GN=IPO7 PE=1 SV=1	IPO7	1038	IPO7_HUMAN		1	0.999	25	47
P62280	P62280 RS11_HUMAN 40S ribosomal protein S11 OS=Homo sapiens OX=9606 GN=RPS11 PE=1 SV=3	RPS11	158	RS11_HUMAN		1	0.999	17	28
Q9NVI7-2	Q9NVI7-2 ATD3A_HUMAN Isoform 2 of ATPase family AAA domain-containing protein 3A OS=Homo sapiens OX=9606 GN=ATAD3A	ATAD3A	586	ATD3A_HUMAN		1	0.999	27	27
Q71DI3	Q71DI3 H32_HUMAN Histone H3.2 OS=Homo sapiens OX=9606 GN=HIST2H3A PE=1 SV=3	HIST2H3A	136	H32_HUMAN		1	0.999	17	12
P62266	P62266 RS23_HUMAN 40S ribosomal protein S23 OS=Homo sapiens OX=9606 GN=RPS23 PE=1 SV=3	RPS23	143	RS23_HUMAN		1	0.999	7	6
O14980	O14980 XPO1_HUMAN Exportin-1 OS=Homo sapiens OX=9606 GN=XPO1 PE=1 SV=1	XPO1	1071	XPO1_HUMAN		1	0.999	41	73
P55072	P55072 TERA_HUMAN Transitional endoplasmic reticulum ATPase OS=Homo sapiens OX=9606 GN=VCP PE=1 SV=4	VCP	806	TERA_HUMAN		1	0.999	45	72
P21796	P21796 VDAC1_HUMAN Voltage-dependent anion-selective channel protein 1 OS=Homo sapiens OX=9606 GN=VDAC1 PE=1 SV=2	VDAC1	283	VDAC1_HUMAN		1	0.999	14	37
Q9Y2X3	Q9Y2X3 NOP58_HUMAN Nucleolar protein 58 OS=Homo sapiens OX=9606 GN=NOP58 PE=1 SV=1	NOP58	529	NOP58_HUMAN		1	0.999	23	17
P00505	P00505 AATM_HUMAN Aspartate aminotransferase, mitochondrial OS=Homo sapiens OX=9606 GN=GOT2 PE=1 SV=3	GOT2	430	AATM_HUMAN		1	0.999	26	38
O00567	O00567 NOP56_HUMAN Nucleolar protein 56 OS=Homo sapiens OX=9606 GN=NOP56 PE=1 SV=4	NOP56	594	NOP56_HUMAN		1	0.999	36	10
Q01581	Q01581 HMCS1_HUMAN Hydroxymethylglutaryl-CoA synthase, cytoplasmic OS=Homo sapiens OX=9606 GN=HMGCS1 PE=1 SV=2	HMGCS1	520	HMCS1_HUMAN		1	0.999	29	79
P61247	P61247 RS3A_HUMAN 40S ribosomal protein S3a OS=Homo sapiens OX=9606 GN=RPS3A PE=1 SV=2	RPS3A	264	RS3A_HUMAN		1	0.999	20	65
Q00325-2	Q00325-2 MPCP_HUMAN Isoform B of Phosphate carrier protein, mitochondrial OS=Homo sapiens OX=9606 GN=SLC25A3	SLC25A3	361	MPCP_HUMAN		1	0.999	17	51
Q02878	Q02878 RL6_HUMAN 60S ribosomal protein L6 OS=Homo sapiens OX=9606 GN=RPL6 PE=1 SV=3	RPL6	288	RL6_HUMAN		1	0.999	20	46
Q12905	Q12905 ILF2_HUMAN Interleukin enhancer-binding factor 2 OS=Homo sapiens OX=9606 GN=ILF2 PE=1 SV=2	ILF2	390	ILF2_HUMAN		1	0.999	21	44
P52597	P52597 HNRPF_HUMAN Heterogeneous nuclear ribonucleoprotein F OS=Homo sapiens OX=9606 GN=HNRNPF PE=1 SV=3	HNRNPF	415	HNRPF_HUMAN		1	0.999	16	39
P04040	P04040 CATA_HUMAN Catalase OS=Homo sapiens OX=9606 GN=CAT PE=1 SV=3	CAT	527	CATA_HUMAN		1	0.999	30	32
P04259	P04259 K2C6B_HUMAN Keratin, type II cytoskeletal 6B OS=Homo sapiens OX=9606 GN=KRT6B PE=1 SV=5	KRT6B	564	K2C6B_HUMAN		1	0.999	64	20
Q9HAV4	Q9HAV4 XPO5_HUMAN Exportin-5 OS=Homo sapiens OX=9606 GN=XPO5 PE=1 SV=1	XPO5	1204	XPO5_HUMAN		1	0.999	35	18
P84243	P84243 H33_HUMAN Histone H3.3 OS=Homo sapiens OX=9606 GN=H3F3A PE=1 SV=2	H3F3A	136	H33_HUMAN		1	0.999	16	9
P48643	P48643 TCPE_HUMAN T-complex protein 1 subunit epsilon OS=Homo sapiens OX=9606 GN=CCT5 PE=1 SV=1	CCT5	541	TCPE_HUMAN		1	0.999	34	68
P55884	P55884 EIF3B_HUMAN Eukaryotic translation initiation factor 3 subunit B OS=Homo sapiens OX=9606 GN=EIF3B PE=1 SV=3	EIF3B	814	EIF3B_HUMAN	P55884-2	1	0.999	27	21
Q13263	Q13263 TIF1B_HUMAN Transcription intermediary factor 1-beta OS=Homo sapiens OX=9606 GN=TRIM28 PE=1 SV=5	TRIM28	835	TIF1B_HUMAN		1	0.999	29	18
O43143	O43143 DHX15_HUMAN Pre-mRNA-splicing factor ATP-dependent RNA helicase DHX15 OS=Homo sapiens OX=9606 GN=DHX15 PE=1 SV=2	DHX15	795	DHX15_HUMAN		1	0.999	31	31
Q14566	Q14566 MCM6_HUMAN DNA replication licensing factor MCM6 OS=Homo sapiens OX=9606 GN=MCM6 PE=1 SV=1	MCM6	821	MCM6_HUMAN		1	0.999	31	23
P09874	P09874 PARP1_HUMAN Poly [ADP-ribose] polymerase 1 OS=Homo sapiens OX=9606 GN=PARP1 PE=1 SV=4	PARP1	1014	PARP1_HUMAN		1	0.999	51	44
Q96RQ3	Q96RQ3 MCCA_HUMAN Methylcrotonoyl-CoA carboxylase subunit alpha, mitochondrial OS=Homo sapiens OX=9606 GN=MCCC1 PE=1 SV=3	MCCC1	725	MCCA_HUMAN		1	0.999	28	33
P00387	P00387 NB5R3_HUMAN NADH-cytochrome b5 reductase 3 OS=Homo sapiens OX=9606 GN=CYB5R3 PE=1 SV=3	CYB5R3	301	NB5R3_HUMAN	P00387-2, P00387-3	1	0.999	21	30
P14866	P14866 HNRPL_HUMAN Heterogeneous nuclear ribonucleoprotein L OS=Homo sapiens OX=9606 GN=HNRNPL PE=1 SV=2	HNRNPL	589	HNRPL_HUMAN		1	0.999	15	30
P38919	P38919 IF4A3_HUMAN Eukaryotic initiation factor 4A-III OS=Homo sapiens OX=9606 GN=EIF4A3 PE=1 SV=4	EIF4A3	411	IF4A3_HUMAN		1	0.999	25	22
Q04837	Q04837 SSBP_HUMAN Single-stranded DNA-binding protein, mitochondrial OS=Homo sapiens OX=9606 GN=SSBP1 PE=1 SV=1	SSBP1	148	SSBP_HUMAN		1	0.999	10	21
Q9HCC0	Q9HCC0 MCCB_HUMAN Methylcrotonoyl-CoA carboxylase beta chain, mitochondrial OS=Homo sapiens OX=9606 GN=MCCC2 PE=1 SV=1	MCCC2	563	MCCB_HUMAN		1	0.999	30	66
Q06830	Q06830 PRDX1_HUMAN Peroxiredoxin-1 OS=Homo sapiens OX=9606 GN=PRDX1 PE=1 SV=1	PRDX1	199	PRDX1_HUMAN		1	0.999	21	30
P27635	P27635 RL10_HUMAN 60S ribosomal protein L10 OS=Homo sapiens OX=9606 GN=RPL10 PE=1 SV=4	RPL10	214	RL10_HUMAN		1	0.999	16	24
Q02543	Q02543 RL18A_HUMAN 60S ribosomal protein L18a OS=Homo sapiens OX=9606 GN=RPL18A PE=1 SV=2	RPL18A	176	RL18A_HUMAN		1	0.999	13	12
P08567	P08567 PLEK_HUMAN Pleckstrin OS=Homo sapiens OX=9606 GN=PLEK PE=1 SV=3	PLEK	350	PLEK_HUMAN		1	0.999	8	9
P07814	P07814 SYEP_HUMAN Bifunctional glutamate/proline--tRNA ligase OS=Homo sapiens OX=9606 GN=EPRS PE=1 SV=5	EPRS	1512	SYEP_HUMAN		1	0.999	46	2
P62140	P62140 PP1B_HUMAN Serine/threonine-protein phosphatase PP1-beta catalytic subunit OS=Homo sapiens OX=9606 GN=PPP1CB PE=1 SV=3	PPP1CB	327	PP1B_HUMAN		1	0.999	23	57
P20700	P20700 LMNB1_HUMAN Lamin-B1 OS=Homo sapiens OX=9606 GN=LMNB1 PE=1 SV=2	LMNB1	586	LMNB1_HUMAN		1	0.999	44	31
Q14166	Q14166 TTL12_HUMAN Tubulin--tyrosine ligase-like protein 12 OS=Homo sapiens OX=9606 GN=TTLL12 PE=1 SV=2	TTLL12	644	TTL12_HUMAN		1	0.999	28	20
P04843	P04843 RPN1_HUMAN Dolichyl-diphosphooligosaccharide--protein glycosyltransferase subunit 1 OS=Homo sapiens OX=9606 GN=RPN1 PE=1 SV=1	RPN1	607	RPN1_HUMAN		1	0.999	32	70
Q14697	Q14697 GANAB_HUMAN Neutral alpha-glucosidase AB OS=Homo sapiens OX=9606 GN=GANAB PE=1 SV=3	GANAB	944	GANAB_HUMAN		1	0.999	31	65
P62826	P62826 RAN_HUMAN GTP-binding nuclear protein Ran OS=Homo sapiens OX=9606 GN=RAN PE=1 SV=3	RAN	216	RAN_HUMAN		1	0.999	15	53
Q12906-4	Q12906-4 ILF3_HUMAN Isoform 4 of Interleukin enhancer-binding factor 3 OS=Homo sapiens OX=9606 GN=ILF3	ILF3	698	ILF3_HUMAN	Q12906-6, Q12906-7	1	0.999	31	31
P02787	P02787 TRFE_HUMAN Serotransferrin OS=Homo sapiens OX=9606 GN=TF PE=1 SV=3	TF	698	TRFE_HUMAN		1	0.999	32	30
P33992	P33992 MCM5_HUMAN DNA replication licensing factor MCM5 OS=Homo sapiens OX=9606 GN=MCM5 PE=1 SV=5	MCM5	734	MCM5_HUMAN		1	0.999	37	23
P84098	P84098 RL19_HUMAN 60S ribosomal protein L19 OS=Homo sapiens OX=9606 GN=RPL19 PE=1 SV=1	RPL19	196	RL19_HUMAN		1	0.999	12	19
P14923	P14923 PLAK_HUMAN Junction plakoglobin OS=Homo sapiens OX=9606 GN=JUP PE=1 SV=3	JUP	745	PLAK_HUMAN		1	0.999	39	5
P07737	P07737 PROF1_HUMAN Profilin-1 OS=Homo sapiens OX=9606 GN=PFN1 PE=1 SV=2	PFN1	140	PROF1_HUMAN		1	0.999	14	47
P84077	P84077 ARF1_HUMAN ADP-ribosylation factor 1 OS=Homo sapiens OX=9606 GN=ARF1 PE=1 SV=2	ARF1	181	ARF1_HUMAN		1	0.999	12	32
Q99798	Q99798 ACON_HUMAN Aconitate hydratase, mitochondrial OS=Homo sapiens OX=9606 GN=ACO2 PE=1 SV=2	ACO2	780	ACON_HUMAN		1	0.999	30	24
P27694	P27694 RFA1_HUMAN Replication protein A 70 kDa DNA-binding subunit OS=Homo sapiens OX=9606 GN=RPA1 PE=1 SV=2	RPA1	616	RFA1_HUMAN		1	0.999	25	23
P55795	P55795 HNRH2_HUMAN Heterogeneous nuclear ribonucleoprotein H2 OS=Homo sapiens OX=9606 GN=HNRNPH2 PE=1 SV=1	HNRNPH2	449	HNRH2_HUMAN		1	0.999	13	2
P62081	P62081 RS7_HUMAN 40S ribosomal protein S7 OS=Homo sapiens OX=9606 GN=RPS7 PE=1 SV=1	RPS7	194	RS7_HUMAN		1	0.999	15	42
Q9H857-2	Q9H857-2 NT5D2_HUMAN Isoform 2 of 5'-nucleotidase domain-containing protein 2 OS=Homo sapiens OX=9606 GN=NT5DC2	NT5DC2	557	NT5D2_HUMAN		1	0.999	23	18
P06493	P06493 CDK1_HUMAN Cyclin-dependent kinase 1 OS=Homo sapiens OX=9606 GN=CDK1 PE=1 SV=3	CDK1	297	CDK1_HUMAN		1	0.999	17	15
Q9Y5B9	Q9Y5B9 SP16H_HUMAN FACT complex subunit SPT16 OS=Homo sapiens OX=9606 GN=SUPT16H PE=1 SV=1	SUPT16H	1047	SP16H_HUMAN		1	0.999	40	2
P50454	P50454 SERPH_HUMAN Serpin H1 OS=Homo sapiens OX=9606 GN=SERPINH1 PE=1 SV=2	SERPINH1	418	SERPH_HUMAN		1	0.999	26	137
P09211	P09211 GSTP1_HUMAN Glutathione S-transferase P OS=Homo sapiens OX=9606 GN=GSTP1 PE=1 SV=2	GSTP1	210	GSTP1_HUMAN		1	0.999	15	41
P02786	P02786 TFR1_HUMAN Transferrin receptor protein 1 OS=Homo sapiens OX=9606 GN=TFRC PE=1 SV=2	TFRC	760	TFR1_HUMAN		1	0.999	31	40
P53618	P53618 COPB_HUMAN Coatomer subunit beta OS=Homo sapiens OX=9606 GN=COPB1 PE=1 SV=3	COPB1	953	COPB_HUMAN		1	0.999	36	27
Q14152	Q14152 EIF3A_HUMAN Eukaryotic translation initiation factor 3 subunit A OS=Homo sapiens OX=9606 GN=EIF3A PE=1 SV=1	EIF3A	1382	EIF3A_HUMAN		1	0.999	30	3
P07237	P07237 PDIA1_HUMAN Protein disulfide-isomerase OS=Homo sapiens OX=9606 GN=P4HB PE=1 SV=3	P4HB	508	PDIA1_HUMAN		1	0.999	35	90
P46777	P46777 RL5_HUMAN 60S ribosomal protein L5 OS=Homo sapiens OX=9606 GN=RPL5 PE=1 SV=3	RPL5	297	RL5_HUMAN		1	0.999	16	40
Q07065	Q07065 CKAP4_HUMAN Cytoskeleton-associated protein 4 OS=Homo sapiens OX=9606 GN=CKAP4 PE=1 SV=2	CKAP4	602	CKAP4_HUMAN		1	0.999	29	57
P48735	P48735 IDHP_HUMAN Isocitrate dehydrogenase [NADP], mitochondrial OS=Homo sapiens OX=9606 GN=IDH2 PE=1 SV=2	IDH2	452	IDHP_HUMAN		1	0.999	24	54
P62269	P62269 RS18_HUMAN 40S ribosomal protein S18 OS=Homo sapiens OX=9606 GN=RPS18 PE=1 SV=3	RPS18	152	RS18_HUMAN		1	0.999	16	44
P18621	P18621 RL17_HUMAN 60S ribosomal protein L17 OS=Homo sapiens OX=9606 GN=RPL17 PE=1 SV=3	RPL17	184	RL17_HUMAN	P18621-3	1	0.999	7	44
P46781	P46781 RS9_HUMAN 40S ribosomal protein S9 OS=Homo sapiens OX=9606 GN=RPS9 PE=1 SV=3	RPS9	194	RS9_HUMAN		1	0.999	17	30
P49736	P49736 MCM2_HUMAN DNA replication licensing factor MCM2 OS=Homo sapiens OX=9606 GN=MCM2 PE=1 SV=4	MCM2	904	MCM2_HUMAN		1	0.999	31	18
Q16795	Q16795 NDUA9_HUMAN NADH dehydrogenase [ubiquinone] 1 alpha subcomplex subunit 9, mitochondrial OS=Homo sapiens OX=9606 GN=NDUFA9 PE=1 SV=2	NDUFA9	377	NDUA9_HUMAN		1	0.999	18	15
P06858	P06858 LIPL_HUMAN Lipoprotein lipase OS=Homo sapiens OX=9606 GN=LPL PE=1 SV=1	LPL	475	LIPL_HUMAN		1	0.999	14	8
P30101	P30101 PDIA3_HUMAN Protein disulfide-isomerase A3 OS=Homo sapiens OX=9606 GN=PDIA3 PE=1 SV=4	PDIA3	505	PDIA3_HUMAN		1	0.999	33	79
P08758	P08758 ANXA5_HUMAN Annexin A5 OS=Homo sapiens OX=9606 GN=ANXA5 PE=1 SV=2	ANXA5	320	ANXA5_HUMAN		1	0.999	26	43
P08865	P08865 RSSA_HUMAN 40S ribosomal protein SA OS=Homo sapiens OX=9606 GN=RPSA PE=1 SV=4	RPSA	295	RSSA_HUMAN		1	0.999	17	39
Q9Y678	Q9Y678 COPG1_HUMAN Coatomer subunit gamma-1 OS=Homo sapiens OX=9606 GN=COPG1 PE=1 SV=1	COPG1	874	COPG1_HUMAN		1	0.999	33	27
O75390	O75390 CISY_HUMAN Citrate synthase, mitochondrial OS=Homo sapiens OX=9606 GN=CS PE=1 SV=2	CS	466	CISY_HUMAN		1	0.999	18	13
Q04695	Q04695 K1C17_HUMAN Keratin, type I cytoskeletal 17 OS=Homo sapiens OX=9606 GN=KRT17 PE=1 SV=2	KRT17	432	K1C17_HUMAN		1	0.999	55	8
Q86YZ3	Q86YZ3 HORN_HUMAN Hornerin OS=Homo sapiens OX=9606 GN=HRNR PE=1 SV=2	HRNR	2850	HORN_HUMAN		1	0.999	22	7
P23528	P23528 COF1_HUMAN Cofilin-1 OS=Homo sapiens OX=9606 GN=CFL1 PE=1 SV=3	CFL1	166	COF1_HUMAN		1	0.999	18	69
P30041	P30041 PRDX6_HUMAN Peroxiredoxin-6 OS=Homo sapiens OX=9606 GN=PRDX6 PE=1 SV=3	PRDX6	224	PRDX6_HUMAN		1	0.999	15	43
P22695	P22695 QCR2_HUMAN Cytochrome b-c1 complex subunit 2, mitochondrial OS=Homo sapiens OX=9606 GN=UQCRC2 PE=1 SV=3	UQCRC2	453	QCR2_HUMAN		1	0.999	17	43
P04350	P04350 TBB4A_HUMAN Tubulin beta-4A chain OS=Homo sapiens OX=9606 GN=TUBB4A PE=1 SV=2	TUBB4A	444	TBB4A_HUMAN		1	0.999	29	31
P43304	P43304 GPDM_HUMAN Glycerol-3-phosphate dehydrogenase, mitochondrial OS=Homo sapiens OX=9606 GN=GPD2 PE=1 SV=3	GPD2	727	GPDM_HUMAN		1	0.999	26	29
P62910	P62910 RL32_HUMAN 60S ribosomal protein L32 OS=Homo sapiens OX=9606 GN=RPL32 PE=1 SV=2	RPL32	135	RL32_HUMAN		1	0.999	14	26
P12004	P12004 PCNA_HUMAN Proliferating cell nuclear antigen OS=Homo sapiens OX=9606 GN=PCNA PE=1 SV=1	PCNA	261	PCNA_HUMAN		1	0.999	16	22
P62244	P62244 RS15A_HUMAN 40S ribosomal protein S15a OS=Homo sapiens OX=9606 GN=RPS15A PE=1 SV=2	RPS15A	130	RS15A_HUMAN		1	0.999	10	19
P43246	P43246 MSH2_HUMAN DNA mismatch repair protein Msh2 OS=Homo sapiens OX=9606 GN=MSH2 PE=1 SV=1	MSH2	934	MSH2_HUMAN		1	0.999	27	19
Q08945	Q08945 SSRP1_HUMAN FACT complex subunit SSRP1 OS=Homo sapiens OX=9606 GN=SSRP1 PE=1 SV=1	SSRP1	709	SSRP1_HUMAN		1	0.999	29	12
P40429	P40429 RL13A_HUMAN 60S ribosomal protein L13a OS=Homo sapiens OX=9606 GN=RPL13A PE=1 SV=2	RPL13A	203	RL13A_HUMAN		1	0.999	15	11
P62753	P62753 RS6_HUMAN 40S ribosomal protein S6 OS=Homo sapiens OX=9606 GN=RPS6 PE=1 SV=1	RPS6	249	RS6_HUMAN		1	0.999	15	10
P47989	P47989 XDH_HUMAN Xanthine dehydrogenase/oxidase OS=Homo sapiens OX=9606 GN=XDH PE=1 SV=4	XDH	1333	XDH_HUMAN		1	0.999	18	6
P27797	P27797 CALR_HUMAN Calreticulin OS=Homo sapiens OX=9606 GN=CALR PE=1 SV=1	CALR	417	CALR_HUMAN		1	0.999	21	91
P26641	P26641 EF1G_HUMAN Elongation factor 1-gamma OS=Homo sapiens OX=9606 GN=EEF1G PE=1 SV=3	EEF1G	437	EF1G_HUMAN		1	0.999	25	79
P30153	P30153 2AAA_HUMAN Serine/threonine-protein phosphatase 2A 65 kDa regulatory subunit A alpha isoform OS=Homo sapiens OX=9606 GN=PPP2R1A PE=1 SV=4	PPP2R1A	589	2AAA_HUMAN		1	0.999	30	56
Q7L2H7	Q7L2H7 EIF3M_HUMAN Eukaryotic translation initiation factor 3 subunit M OS=Homo sapiens OX=9606 GN=EIF3M PE=1 SV=1	EIF3M	374	EIF3M_HUMAN		1	0.999	18	46
P05455	P05455 LA_HUMAN Lupus La protein OS=Homo sapiens OX=9606 GN=SSB PE=1 SV=2	SSB	408	LA_HUMAN		1	0.999	26	43
P14868	P14868 SYDC_HUMAN Aspartate--tRNA ligase, cytoplasmic OS=Homo sapiens OX=9606 GN=DARS PE=1 SV=2	DARS	501	SYDC_HUMAN		1	0.999	29	39
P09936	P09936 UCHL1_HUMAN Ubiquitin carboxyl-terminal hydrolase isozyme L1 OS=Homo sapiens OX=9606 GN=UCHL1 PE=1 SV=2	UCHL1	223	UCHL1_HUMAN		1	0.999	11	38
P31930	P31930 QCR1_HUMAN Cytochrome b-c1 complex subunit 1, mitochondrial OS=Homo sapiens OX=9606 GN=UQCRC1 PE=1 SV=3	UQCRC1	480	QCR1_HUMAN		1	0.999	16	35
P07910-2	P07910-2 HNRPC_HUMAN Isoform C1 of Heterogeneous nuclear ribonucleoproteins C1/C2 OS=Homo sapiens OX=9606 GN=HNRNPC	HNRNPC	293	HNRPC_HUMAN		1	0.999	19	17
Q9GZL7	Q9GZL7 WDR12_HUMAN Ribosome biogenesis protein WDR12 OS=Homo sapiens OX=9606 GN=WDR12 PE=1 SV=2	WDR12	423	WDR12_HUMAN		1	0.999	16	13
O00194	O00194 RB27B_HUMAN Ras-related protein Rab-27B OS=Homo sapiens OX=9606 GN=RAB27B PE=1 SV=4	RAB27B	218	RB27B_HUMAN		1	0.999	3	5
Q8TDN6	Q8TDN6 BRX1_HUMAN Ribosome biogenesis protein BRX1 homolog OS=Homo sapiens OX=9606 GN=BRIX1 PE=1 SV=2	BRIX1	353	BRX1_HUMAN		1	0.999	18	3
P27695	P27695 APEX1_HUMAN DNA-(apurinic or apyrimidinic site) lyase OS=Homo sapiens OX=9606 GN=APEX1 PE=1 SV=2	APEX1	318	APEX1_HUMAN		1	0.999	23	37
P04792	P04792 HSPB1_HUMAN Heat shock protein beta-1 OS=Homo sapiens OX=9606 GN=HSPB1 PE=1 SV=2	HSPB1	205	HSPB1_HUMAN		1	0.999	19	34
Q02790	Q02790 FKBP4_HUMAN Peptidyl-prolyl cis-trans isomerase FKBP4 OS=Homo sapiens OX=9606 GN=FKBP4 PE=1 SV=3	FKBP4	459	FKBP4_HUMAN		1	0.999	28	31
P16435	P16435 NCPR_HUMAN NADPH--cytochrome P450 reductase OS=Homo sapiens OX=9606 GN=POR PE=1 SV=2	POR	677	NCPR_HUMAN		1	0.999	28	29
P62829	P62829 RL23_HUMAN 60S ribosomal protein L23 OS=Homo sapiens OX=9606 GN=RPL23 PE=1 SV=1	RPL23	140	RL23_HUMAN		1	0.999	9	22
Q9BPW8	Q9BPW8 NIPS1_HUMAN Protein NipSnap homolog 1 OS=Homo sapiens OX=9606 GN=NIPSNAP1 PE=1 SV=1	NIPSNAP1	284	NIPS1_HUMAN		1	0.999	12	10
Q14692	Q14692 BMS1_HUMAN Ribosome biogenesis protein BMS1 homolog OS=Homo sapiens OX=9606 GN=BMS1 PE=1 SV=1	BMS1	1282	BMS1_HUMAN		1	0.999	19	1
P06744	P06744 G6PI_HUMAN Glucose-6-phosphate isomerase OS=Homo sapiens OX=9606 GN=GPI PE=1 SV=4	GPI	558	G6PI_HUMAN		1	0.999	26	96
P25398	P25398 RS12_HUMAN 40S ribosomal protein S12 OS=Homo sapiens OX=9606 GN=RPS12 PE=1 SV=3	RPS12	132	RS12_HUMAN		1	0.999	9	59
Q9P258	Q9P258 RCC2_HUMAN Protein RCC2 OS=Homo sapiens OX=9606 GN=RCC2 PE=1 SV=2	RCC2	522	RCC2_HUMAN		1	0.999	20	29
P17812	P17812 PYRG1_HUMAN CTP synthase 1 OS=Homo sapiens OX=9606 GN=CTPS1 PE=1 SV=2	CTPS1	591	PYRG1_HUMAN		1	0.999	25	28
O60568	O60568 PLOD3_HUMAN Multifunctional procollagen lysine hydroxylase and glycosyltransferase LH3 OS=Homo sapiens OX=9606 GN=PLOD3 PE=1 SV=1	PLOD3	738	PLOD3_HUMAN		1	0.999	27	27
P62917	P62917 RL8_HUMAN 60S ribosomal protein L8 OS=Homo sapiens OX=9606 GN=RPL8 PE=1 SV=2	RPL8	257	RL8_HUMAN		1	0.999	17	25
P30084	P30084 ECHM_HUMAN Enoyl-CoA hydratase, mitochondrial OS=Homo sapiens OX=9606 GN=ECHS1 PE=1 SV=4	ECHS1	290	ECHM_HUMAN		1	0.999	14	25
O94925-3	O94925-3 GLSK_HUMAN Isoform 3 of Glutaminase kidney isoform, mitochondrial OS=Homo sapiens OX=9606 GN=GLS	GLS	598	GLSK_HUMAN		1	0.999	16	15
Q9NXF1	Q9NXF1 TEX10_HUMAN Testis-expressed protein 10 OS=Homo sapiens OX=9606 GN=TEX10 PE=1 SV=2	TEX10	929	TEX10_HUMAN	Q9NXF1-2	1	0.999	18	3
P09382	P09382 LEG1_HUMAN Galectin-1 OS=Homo sapiens OX=9606 GN=LGALS1 PE=1 SV=2	LGALS1	135	LEG1_HUMAN		1	0.999	8	55
P27348	P27348 1433T_HUMAN 14-3-3 protein theta OS=Homo sapiens OX=9606 GN=YWHAQ PE=1 SV=1	YWHAQ	245	1433T_HUMAN		1	0.999	22	32
P43686	P43686 PRS6B_HUMAN 26S proteasome regulatory subunit 6B OS=Homo sapiens OX=9606 GN=PSMC4 PE=1 SV=2	PSMC4	418	PRS6B_HUMAN		1	0.999	17	26
P31943	P31943 HNRH1_HUMAN Heterogeneous nuclear ribonucleoprotein H OS=Homo sapiens OX=9606 GN=HNRNPH1 PE=1 SV=4	HNRNPH1	449	HNRH1_HUMAN		1	0.999	13	21
Q8NBX0	Q8NBX0 SCPDL_HUMAN Saccharopine dehydrogenase-like oxidoreductase OS=Homo sapiens OX=9606 GN=SCCPDH PE=1 SV=1	SCCPDH	429	SCPDL_HUMAN		1	0.999	12	21
P15121	P15121 ALDR_HUMAN Aldo-keto reductase family 1 member B1 OS=Homo sapiens OX=9606 GN=AKR1B1 PE=1 SV=3	AKR1B1	316	ALDR_HUMAN		1	0.999	18	20
Q15738	Q15738 NSDHL_HUMAN Sterol-4-alpha-carboxylate 3-dehydrogenase, decarboxylating OS=Homo sapiens OX=9606 GN=NSDHL PE=1 SV=2	NSDHL	373	NSDHL_HUMAN		1	0.999	15	19
P62263	P62263 RS14_HUMAN 40S ribosomal protein S14 OS=Homo sapiens OX=9606 GN=RPS14 PE=1 SV=3	RPS14	151	RS14_HUMAN		1	0.999	11	16
P14550	P14550 AK1A1_HUMAN Aldo-keto reductase family 1 member A1 OS=Homo sapiens OX=9606 GN=AKR1A1 PE=1 SV=3	AKR1A1	325	AK1A1_HUMAN		1	0.999	18	11
A0FGR8-2	A0FGR8-2 ESYT2_HUMAN Isoform 2 of Extended synaptotagmin-2 OS=Homo sapiens OX=9606 GN=ESYT2	ESYT2	893	ESYT2_HUMAN		1	0.999	20	9
P37802	P37802 TAGL2_HUMAN Transgelin-2 OS=Homo sapiens OX=9606 GN=TAGLN2 PE=1 SV=3	TAGLN2	199	TAGL2_HUMAN	P37802-2	1	0.999	9	8
O95757	O95757 HS74L_HUMAN Heat shock 70 kDa protein 4L OS=Homo sapiens OX=9606 GN=HSPA4L PE=1 SV=3	HSPA4L	839	HS74L_HUMAN		1	0.999	28	7
Q12788	Q12788 TBL3_HUMAN Transducin beta-like protein 3 OS=Homo sapiens OX=9606 GN=TBL3 PE=1 SV=2	TBL3	808	TBL3_HUMAN		1	0.999	30	2
Q15365	Q15365 PCBP1_HUMAN Poly(rC)-binding protein 1 OS=Homo sapiens OX=9606 GN=PCBP1 PE=1 SV=2	PCBP1	356	PCBP1_HUMAN		1	0.999	15	49
Q01518	Q01518 CAP1_HUMAN Adenylyl cyclase-associated protein 1 OS=Homo sapiens OX=9606 GN=CAP1 PE=1 SV=5	CAP1	475	CAP1_HUMAN		1	0.999	23	42
P25787	P25787 PSA2_HUMAN Proteasome subunit alpha type-2 OS=Homo sapiens OX=9606 GN=PSMA2 PE=1 SV=2	PSMA2	234	PSA2_HUMAN		1	0.999	15	27
P48047	P48047 ATPO_HUMAN ATP synthase subunit O, mitochondrial OS=Homo sapiens OX=9606 GN=ATP5PO PE=1 SV=1	ATP5PO	213	ATPO_HUMAN		1	0.999	12	26
P62750	P62750 RL23A_HUMAN 60S ribosomal protein L23a OS=Homo sapiens OX=9606 GN=RPL23A PE=1 SV=1	RPL23A	156	RL23A_HUMAN		1	0.999	13	26
P61221	P61221 ABCE1_HUMAN ATP-binding cassette sub-family E member 1 OS=Homo sapiens OX=9606 GN=ABCE1 PE=1 SV=1	ABCE1	599	ABCE1_HUMAN		1	0.999	20	21
Q07021	Q07021 C1QBP_HUMAN Complement component 1 Q subcomponent-binding protein, mitochondrial OS=Homo sapiens OX=9606 GN=C1QBP PE=1 SV=1	C1QBP	282	C1QBP_HUMAN		1	0.999	10	17
P23368	P23368 MAOM_HUMAN NAD-dependent malic enzyme, mitochondrial OS=Homo sapiens OX=9606 GN=ME2 PE=1 SV=1	ME2	584	MAOM_HUMAN		1	0.999	16	16
Q9Y4W6	Q9Y4W6 AFG32_HUMAN AFG3-like protein 2 OS=Homo sapiens OX=9606 GN=AFG3L2 PE=1 SV=2	AFG3L2	797	AFG32_HUMAN		1	0.999	21	4
Q9UQ80	Q9UQ80 PA2G4_HUMAN Proliferation-associated protein 2G4 OS=Homo sapiens OX=9606 GN=PA2G4 PE=1 SV=3	PA2G4	394	PA2G4_HUMAN		1	0.999	25	63
P18669	P18669 PGAM1_HUMAN Phosphoglycerate mutase 1 OS=Homo sapiens OX=9606 GN=PGAM1 PE=1 SV=2	PGAM1	254	PGAM1_HUMAN		1	0.999	16	61
P09429	P09429 HMGB1_HUMAN High mobility group protein B1 OS=Homo sapiens OX=9606 GN=HMGB1 PE=1 SV=3	HMGB1	215	HMGB1_HUMAN		1	0.999	21	49
P62841	P62841 RS15_HUMAN 40S ribosomal protein S15 OS=Homo sapiens OX=9606 GN=RPS15 PE=1 SV=2	RPS15	145	RS15_HUMAN		1	0.999	8	37
P41250	P41250 GARS_HUMAN Glycine--tRNA ligase OS=Homo sapiens OX=9606 GN=GARS PE=1 SV=3	GARS	739	GARS_HUMAN		1	0.999	29	33
P62906	P62906 RL10A_HUMAN 60S ribosomal protein L10a OS=Homo sapiens OX=9606 GN=RPL10A PE=1 SV=2	RPL10A	217	RL10A_HUMAN		1	0.999	11	31
P00491	P00491 PNPH_HUMAN Purine nucleoside phosphorylase OS=Homo sapiens OX=9606 GN=PNP PE=1 SV=2	PNP	289	PNPH_HUMAN		1	0.999	14	27
P62249	P62249 RS16_HUMAN 40S ribosomal protein S16 OS=Homo sapiens OX=9606 GN=RPS16 PE=1 SV=2	RPS16	146	RS16_HUMAN		1	0.999	17	27
P46459	P46459 NSF_HUMAN Vesicle-fusing ATPase OS=Homo sapiens OX=9606 GN=NSF PE=1 SV=3	NSF	744	NSF_HUMAN		1	0.999	31	23
Q9Y4P3	Q9Y4P3 TBL2_HUMAN Transducin beta-like protein 2 OS=Homo sapiens OX=9606 GN=TBL2 PE=1 SV=1	TBL2	447	TBL2_HUMAN		1	0.999	20	23
P51149	P51149 RAB7A_HUMAN Ras-related protein Rab-7a OS=Homo sapiens OX=9606 GN=RAB7A PE=1 SV=1	RAB7A	207	RAB7A_HUMAN		1	0.999	15	20
P60228	P60228 EIF3E_HUMAN Eukaryotic translation initiation factor 3 subunit E OS=Homo sapiens OX=9606 GN=EIF3E PE=1 SV=1	EIF3E	445	EIF3E_HUMAN		1	0.999	20	18
Q14534	Q14534 ERG1_HUMAN Squalene monooxygenase OS=Homo sapiens OX=9606 GN=SQLE PE=1 SV=3	SQLE	574	ERG1_HUMAN		1	0.999	15	4
O00203	O00203 AP3B1_HUMAN AP-3 complex subunit beta-1 OS=Homo sapiens OX=9606 GN=AP3B1 PE=1 SV=3	AP3B1	1094	AP3B1_HUMAN	O00203-3	1	0.999	13	3
Q08188	Q08188 TGM3_HUMAN Protein-glutamine gamma-glutamyltransferase E OS=Homo sapiens OX=9606 GN=TGM3 PE=1 SV=4	TGM3	693	TGM3_HUMAN		1	0.999	26	1
P35998	P35998 PRS7_HUMAN 26S proteasome regulatory subunit 7 OS=Homo sapiens OX=9606 GN=PSMC2 PE=1 SV=3	PSMC2	433	PRS7_HUMAN		1	0.999	27	36
Q9UBB4	Q9UBB4 ATX10_HUMAN Ataxin-10 OS=Homo sapiens OX=9606 GN=ATXN10 PE=1 SV=1	ATXN10	475	ATX10_HUMAN		1	0.999	18	34
O95573	O95573 ACSL3_HUMAN Long-chain-fatty-acid--CoA ligase 3 OS=Homo sapiens OX=9606 GN=ACSL3 PE=1 SV=3	ACSL3	720	ACSL3_HUMAN		1	0.999	25	21
P46778	P46778 RL21_HUMAN 60S ribosomal protein L21 OS=Homo sapiens OX=9606 GN=RPL21 PE=1 SV=2	RPL21	160	RL21_HUMAN		1	0.999	7	17
Q09161	Q09161 NCBP1_HUMAN Nuclear cap-binding protein subunit 1 OS=Homo sapiens OX=9606 GN=NCBP1 PE=1 SV=1	NCBP1	790	NCBP1_HUMAN		1	0.999	22	14
P29992	P29992 GNA11_HUMAN Guanine nucleotide-binding protein subunit alpha-11 OS=Homo sapiens OX=9606 GN=GNA11 PE=1 SV=2	GNA11	359	GNA11_HUMAN		1	0.999	11	11
Q9UKD2	Q9UKD2 MRT4_HUMAN mRNA turnover protein 4 homolog OS=Homo sapiens OX=9606 GN=MRTO4 PE=1 SV=2	MRTO4	239	MRT4_HUMAN		1	0.999	12	9
P58546	P58546 MTPN_HUMAN Myotrophin OS=Homo sapiens OX=9606 GN=MTPN PE=1 SV=2	MTPN	118	MTPN_HUMAN		1	0.999	6	5
O60832	O60832 DKC1_HUMAN H/ACA ribonucleoprotein complex subunit DKC1 OS=Homo sapiens OX=9606 GN=DKC1 PE=1 SV=3	DKC1	514	DKC1_HUMAN		1	0.999	12	5
O43175	O43175 SERA_HUMAN D-3-phosphoglycerate dehydrogenase OS=Homo sapiens OX=9606 GN=PHGDH PE=1 SV=4	PHGDH	533	SERA_HUMAN		1	0.999	27	77
O75874	O75874 IDHC_HUMAN Isocitrate dehydrogenase [NADP] cytoplasmic OS=Homo sapiens OX=9606 GN=IDH1 PE=1 SV=2	IDH1	414	IDHC_HUMAN		1	0.999	21	43
P04083	P04083 ANXA1_HUMAN Annexin A1 OS=Homo sapiens OX=9606 GN=ANXA1 PE=1 SV=2	ANXA1	346	ANXA1_HUMAN		1	0.999	22	29
P61586	P61586 RHOA_HUMAN Transforming protein RhoA OS=Homo sapiens OX=9606 GN=RHOA PE=1 SV=1	RHOA	193	RHOA_HUMAN		1	0.999	11	24
P61353	P61353 RL27_HUMAN 60S ribosomal protein L27 OS=Homo sapiens OX=9606 GN=RPL27 PE=1 SV=2	RPL27	136	RL27_HUMAN		1	0.999	8	21
Q13151	Q13151 ROA0_HUMAN Heterogeneous nuclear ribonucleoprotein A0 OS=Homo sapiens OX=9606 GN=HNRNPA0 PE=1 SV=1	HNRNPA0	305	ROA0_HUMAN		1	0.999	9	16
O75439	O75439 MPPB_HUMAN Mitochondrial-processing peptidase subunit beta OS=Homo sapiens OX=9606 GN=PMPCB PE=1 SV=2	PMPCB	489	MPPB_HUMAN		1	0.999	18	15
Q13148	Q13148 TADBP_HUMAN TAR DNA-binding protein 43 OS=Homo sapiens OX=9606 GN=TARDBP PE=1 SV=1	TARDBP	414	TADBP_HUMAN		1	0.999	12	14
P57088	P57088 TMM33_HUMAN Transmembrane protein 33 OS=Homo sapiens OX=9606 GN=TMEM33 PE=1 SV=2	TMEM33	247	TMM33_HUMAN		1	0.999	10	14
P48681	P48681 NEST_HUMAN Nestin OS=Homo sapiens OX=9606 GN=NES PE=1 SV=2	NES	1621	NEST_HUMAN		1	0.999	39	13
Q13162	Q13162 PRDX4_HUMAN Peroxiredoxin-4 OS=Homo sapiens OX=9606 GN=PRDX4 PE=1 SV=1	PRDX4	271	PRDX4_HUMAN		1	0.999	14	13
P63167	P63167 DYL1_HUMAN Dynein light chain 1, cytoplasmic OS=Homo sapiens OX=9606 GN=DYNLL1 PE=1 SV=1	DYNLL1	89	DYL1_HUMAN		1	0.999	8	10
Q9BYD6	Q9BYD6 RM01_HUMAN 39S ribosomal protein L1, mitochondrial OS=Homo sapiens OX=9606 GN=MRPL1 PE=1 SV=2	MRPL1	325	RM01_HUMAN		1	0.999	8	9
P10515	P10515 ODP2_HUMAN Dihydrolipoyllysine-residue acetyltransferase component of pyruvate dehydrogenase complex, mitochondrial OS=Homo sapiens OX=9606 GN=DLAT PE=1 SV=3	DLAT	647	ODP2_HUMAN		1	0.999	14	7
Q9H9J2	Q9H9J2 RM44_HUMAN 39S ribosomal protein L44, mitochondrial OS=Homo sapiens OX=9606 GN=MRPL44 PE=1 SV=1	MRPL44	332	RM44_HUMAN		1	0.999	11	6
P53597	P53597 SUCA_HUMAN Succinate--CoA ligase [ADP/GDP-forming] subunit alpha, mitochondrial OS=Homo sapiens OX=9606 GN=SUCLG1 PE=1 SV=4	SUCLG1	346	SUCA_HUMAN		1	0.999	8	5
P57678	P57678 GEMI4_HUMAN Gem-associated protein 4 OS=Homo sapiens OX=9606 GN=GEMIN4 PE=1 SV=2	GEMIN4	1058	GEMI4_HUMAN		1	0.999	18	5
Q7Z794	Q7Z794 K2C1B_HUMAN Keratin, type II cytoskeletal 1b OS=Homo sapiens OX=9606 GN=KRT77 PE=2 SV=3	KRT77	578	K2C1B_HUMAN		1	0.999	39	3
O15067	O15067 PUR4_HUMAN Phosphoribosylformylglycinamidine synthase OS=Homo sapiens OX=9606 GN=PFAS PE=1 SV=4	PFAS	1338	PUR4_HUMAN		1	0.999	26	2
Q16891-2	Q16891-2 MIC60_HUMAN Isoform 2 of MICOS complex subunit MIC60 OS=Homo sapiens OX=9606 GN=IMMT	IMMT	747	MIC60_HUMAN		1	0.999	32	43
P62333	P62333 PRS10_HUMAN 26S proteasome regulatory subunit 10B OS=Homo sapiens OX=9606 GN=PSMC6 PE=1 SV=1	PSMC6	389	PRS10_HUMAN		1	0.999	18	31
P41091	P41091 IF2G_HUMAN Eukaryotic translation initiation factor 2 subunit 3 OS=Homo sapiens OX=9606 GN=EIF2S3 PE=1 SV=3	EIF2S3	472	IF2G_HUMAN		1	0.999	20	29
P30086	P30086 PEBP1_HUMAN Phosphatidylethanolamine-binding protein 1 OS=Homo sapiens OX=9606 GN=PEBP1 PE=1 SV=3	PEBP1	187	PEBP1_HUMAN		1	0.999	12	26
P13489	P13489 RINI_HUMAN Ribonuclease inhibitor OS=Homo sapiens OX=9606 GN=RNH1 PE=1 SV=2	RNH1	461	RINI_HUMAN		1	0.999	18	23
P08708	P08708 RS17_HUMAN 40S ribosomal protein S17 OS=Homo sapiens OX=9606 GN=RPS17 PE=1 SV=2	RPS17	135	RS17_HUMAN		1	0.999	10	21
P49591	P49591 SYSC_HUMAN Serine--tRNA ligase, cytoplasmic OS=Homo sapiens OX=9606 GN=SARS PE=1 SV=3	SARS	514	SYSC_HUMAN		1	0.999	19	20
P62277	P62277 RS13_HUMAN 40S ribosomal protein S13 OS=Homo sapiens OX=9606 GN=RPS13 PE=1 SV=2	RPS13	151	RS13_HUMAN		1	0.999	9	19
P31040	P31040 SDHA_HUMAN Succinate dehydrogenase [ubiquinone] flavoprotein subunit, mitochondrial OS=Homo sapiens OX=9606 GN=SDHA PE=1 SV=2	SDHA	664	SDHA_HUMAN		1	0.999	15	19
Q9UNX3	Q9UNX3 RL26L_HUMAN 60S ribosomal protein L26-like 1 OS=Homo sapiens OX=9606 GN=RPL26L1 PE=1 SV=1	RPL26L1	145	RL26L_HUMAN		1	0.999	13	18
Q9UIA9	Q9UIA9 XPO7_HUMAN Exportin-7 OS=Homo sapiens OX=9606 GN=XPO7 PE=1 SV=3	XPO7	1087	XPO7_HUMAN		1	0.999	24	17
Q92841	Q92841 DDX17_HUMAN Probable ATP-dependent RNA helicase DDX17 OS=Homo sapiens OX=9606 GN=DDX17 PE=1 SV=2	DDX17	729	DDX17_HUMAN		1	0.999	24	16
P43490	P43490 NAMPT_HUMAN Nicotinamide phosphoribosyltransferase OS=Homo sapiens OX=9606 GN=NAMPT PE=1 SV=1	NAMPT	491	NAMPT_HUMAN		1	0.999	22	15
O00148	O00148 DX39A_HUMAN ATP-dependent RNA helicase DDX39A OS=Homo sapiens OX=9606 GN=DDX39A PE=1 SV=2	DDX39A	427	DX39A_HUMAN		1	0.999	14	15
P61106	P61106 RAB14_HUMAN Ras-related protein Rab-14 OS=Homo sapiens OX=9606 GN=RAB14 PE=1 SV=4	RAB14	215	RAB14_HUMAN		1	0.999	16	14
Q00535	Q00535 CDK5_HUMAN Cyclin-dependent-like kinase 5 OS=Homo sapiens OX=9606 GN=CDK5 PE=1 SV=3	CDK5	292	CDK5_HUMAN		1	0.999	15	14
P30837	P30837 AL1B1_HUMAN Aldehyde dehydrogenase X, mitochondrial OS=Homo sapiens OX=9606 GN=ALDH1B1 PE=1 SV=3	ALDH1B1	517	AL1B1_HUMAN		1	0.999	21	13
P62888	P62888 RL30_HUMAN 60S ribosomal protein L30 OS=Homo sapiens OX=9606 GN=RPL30 PE=1 SV=2	RPL30	115	RL30_HUMAN		1	0.999	7	13
P83881	P83881 RL36A_HUMAN 60S ribosomal protein L36a OS=Homo sapiens OX=9606 GN=RPL36A PE=1 SV=2	RPL36A	106	RL36A_HUMAN		1	0.999	9	13
Q8IUE6	Q8IUE6 H2A2B_HUMAN Histone H2A type 2-B OS=Homo sapiens OX=9606 GN=HIST2H2AB PE=1 SV=3	HIST2H2AB	130	H2A2B_HUMAN		1	0.999	13	11
P11766	P11766 ADHX_HUMAN Alcohol dehydrogenase class-3 OS=Homo sapiens OX=9606 GN=ADH5 PE=1 SV=4	ADH5	374	ADHX_HUMAN		1	0.999	13	11
A1L0T0	A1L0T0 ILVBL_HUMAN Acetolactate synthase-like protein OS=Homo sapiens OX=9606 GN=ILVBL PE=1 SV=2	ILVBL	632	ILVBL_HUMAN		1	0.999	14	11
Q96C36	Q96C36 P5CR2_HUMAN Pyrroline-5-carboxylate reductase 2 OS=Homo sapiens OX=9606 GN=PYCR2 PE=1 SV=1	PYCR2	320	P5CR2_HUMAN		1	0.999	13	10
P36957	P36957 ODO2_HUMAN Dihydrolipoyllysine-residue succinyltransferase component of 2-oxoglutarate dehydrogenase complex, mitochondrial OS=Homo sapiens OX=9606 GN=DLST PE=1 SV=4	DLST	453	ODO2_HUMAN		1	0.999	9	9
Q8N1N4	Q8N1N4 K2C78_HUMAN Keratin, type II cytoskeletal 78 OS=Homo sapiens OX=9606 GN=KRT78 PE=1 SV=2	KRT78	520	K2C78_HUMAN		1	0.999	29	8
P19623	P19623 SPEE_HUMAN Spermidine synthase OS=Homo sapiens OX=9606 GN=SRM PE=1 SV=1	SRM	302	SPEE_HUMAN		1	0.999	12	4
Q9UNQ2	Q9UNQ2 DIM1_HUMAN Probable dimethyladenosine transferase OS=Homo sapiens OX=9606 GN=DIMT1 PE=1 SV=1	DIMT1	313	DIM1_HUMAN		1	0.999	15	3
Q93009	Q93009 UBP7_HUMAN Ubiquitin carboxyl-terminal hydrolase 7 OS=Homo sapiens OX=9606 GN=USP7 PE=1 SV=2	USP7	1102	UBP7_HUMAN	Q93009-3	1	0.999	15	2
Q96P63-2	Q96P63-2 SPB12_HUMAN Isoform 2 of Serpin B12 OS=Homo sapiens OX=9606 GN=SERPINB12	SERPINB12	425	SPB12_HUMAN		1	0.999	19	1
Q9Y3T9	Q9Y3T9 NOC2L_HUMAN Nucleolar complex protein 2 homolog OS=Homo sapiens OX=9606 GN=NOC2L PE=1 SV=4	NOC2L	749	NOC2L_HUMAN		1	0.999	11	1
Q9UHD8-5	Q9UHD8-5 SEPT9_HUMAN Isoform 5 of Septin-9 OS=Homo sapiens OX=9606 GN=SEPT9	44813	579	SEPT9_HUMAN		1	0.999	25	48
P17980	P17980 PRS6A_HUMAN 26S proteasome regulatory subunit 6A OS=Homo sapiens OX=9606 GN=PSMC3 PE=1 SV=3	PSMC3	439	PRS6A_HUMAN		1	0.999	20	41
Q15366-2	Q15366-2 PCBP2_HUMAN Isoform 2 of Poly(rC)-binding protein 2 OS=Homo sapiens OX=9606 GN=PCBP2	PCBP2	366	PCBP2_HUMAN		1	0.999	16	37
Q9Y3F4	Q9Y3F4 STRAP_HUMAN Serine-threonine kinase receptor-associated protein OS=Homo sapiens OX=9606 GN=STRAP PE=1 SV=1	STRAP	350	STRAP_HUMAN	Q9Y3F4-2	1	0.999	12	27
P23284	P23284 PPIB_HUMAN Peptidyl-prolyl cis-trans isomerase B OS=Homo sapiens OX=9606 GN=PPIB PE=1 SV=2	PPIB	216	PPIB_HUMAN		1	0.999	15	25
O43592	O43592 XPOT_HUMAN Exportin-T OS=Homo sapiens OX=9606 GN=XPOT PE=1 SV=2	XPOT	962	XPOT_HUMAN		1	0.999	23	23
P05198	P05198 IF2A_HUMAN Eukaryotic translation initiation factor 2 subunit 1 OS=Homo sapiens OX=9606 GN=EIF2S1 PE=1 SV=3	EIF2S1	315	IF2A_HUMAN		1	0.999	22	20
P26196	P26196 DDX6_HUMAN Probable ATP-dependent RNA helicase DDX6 OS=Homo sapiens OX=9606 GN=DDX6 PE=1 SV=2	DDX6	483	DDX6_HUMAN		1	0.999	14	19
P53007	P53007 TXTP_HUMAN Tricarboxylate transport protein, mitochondrial OS=Homo sapiens OX=9606 GN=SLC25A1 PE=1 SV=2	SLC25A1	311	TXTP_HUMAN		1	0.999	11	18
Q9Y512	Q9Y512 SAM50_HUMAN Sorting and assembly machinery component 50 homolog OS=Homo sapiens OX=9606 GN=SAMM50 PE=1 SV=3	SAMM50	469	SAM50_HUMAN		1	0.999	18	17
Q14195-2	Q14195-2 DPYL3_HUMAN Isoform LCRMP-4 of Dihydropyrimidinase-related protein 3 OS=Homo sapiens OX=9606 GN=DPYSL3	DPYSL3	684	DPYL3_HUMAN		1	0.999	24	15
Q96CS3	Q96CS3 FAF2_HUMAN FAS-associated factor 2 OS=Homo sapiens OX=9606 GN=FAF2 PE=1 SV=2	FAF2	445	FAF2_HUMAN		1	0.999	15	15
Q9Y3I0	Q9Y3I0 RTCB_HUMAN tRNA-splicing ligase RtcB homolog OS=Homo sapiens OX=9606 GN=RTCB PE=1 SV=1	RTCB	505	RTCB_HUMAN		1	0.999	23	14
P05534	P05534 1A24_HUMAN HLA class I histocompatibility antigen, A-24 alpha chain OS=Homo sapiens OX=9606 GN=HLA-A PE=1 SV=2	HLA-A	365	1A24_HUMAN		1	0.999	21	13
P49821	P49821 NDUV1_HUMAN NADH dehydrogenase [ubiquinone] flavoprotein 1, mitochondrial OS=Homo sapiens OX=9606 GN=NDUFV1 PE=1 SV=4	NDUFV1	464	NDUV1_HUMAN	P49821-2	1	0.999	15	13
P83731	P83731 RL24_HUMAN 60S ribosomal protein L24 OS=Homo sapiens OX=9606 GN=RPL24 PE=1 SV=1	RPL24	157	RL24_HUMAN		1	0.999	10	10
Q8NE71	Q8NE71 ABCF1_HUMAN ATP-binding cassette sub-family F member 1 OS=Homo sapiens OX=9606 GN=ABCF1 PE=1 SV=2	ABCF1	845	ABCF1_HUMAN		1	0.999	18	10
Q9BVI4	Q9BVI4 NOC4L_HUMAN Nucleolar complex protein 4 homolog OS=Homo sapiens OX=9606 GN=NOC4L PE=1 SV=1	NOC4L	516	NOC4L_HUMAN		1	0.999	14	4
Q9BVP2	Q9BVP2 GNL3_HUMAN Guanine nucleotide-binding protein-like 3 OS=Homo sapiens OX=9606 GN=GNL3 PE=1 SV=2	GNL3	549	GNL3_HUMAN	Q9BVP2-2	1	0.999	10	4
Q8NBQ5	Q8NBQ5 DHB11_HUMAN Estradiol 17-beta-dehydrogenase 11 OS=Homo sapiens OX=9606 GN=HSD17B11 PE=1 SV=3	HSD17B11	300	DHB11_HUMAN		1	0.999	12	2
Q5T749	Q5T749 KPRP_HUMAN Keratinocyte proline-rich protein OS=Homo sapiens OX=9606 GN=KPRP PE=1 SV=1	KPRP	579	KPRP_HUMAN		1	0.999	21	1
Q9NVA2	Q9NVA2 SEP11_HUMAN Septin-11 OS=Homo sapiens OX=9606 GN=SEPT11 PE=1 SV=3	44815	429	SEP11_HUMAN		1	0.999	20	40
Q15067-2	Q15067-2 ACOX1_HUMAN Isoform 2 of Peroxisomal acyl-coenzyme A oxidase 1 OS=Homo sapiens OX=9606 GN=ACOX1	ACOX1	660	ACOX1_HUMAN		1	0.999	18	38
Q15181	Q15181 IPYR_HUMAN Inorganic pyrophosphatase OS=Homo sapiens OX=9606 GN=PPA1 PE=1 SV=2	PPA1	289	IPYR_HUMAN		1	0.999	18	28
Q6DD88	Q6DD88 ATLA3_HUMAN Atlastin-3 OS=Homo sapiens OX=9606 GN=ATL3 PE=1 SV=1	ATL3	541	ATLA3_HUMAN		1	0.999	18	28
P24539	P24539 AT5F1_HUMAN ATP synthase F(0) complex subunit B1, mitochondrial OS=Homo sapiens OX=9606 GN=ATP5PB PE=1 SV=2	ATP5PB	256	AT5F1_HUMAN		1	0.999	14	27
P36507	P36507 MP2K2_HUMAN Dual specificity mitogen-activated protein kinase kinase 2 OS=Homo sapiens OX=9606 GN=MAP2K2 PE=1 SV=1	MAP2K2	400	MP2K2_HUMAN		1	0.999	17	24
Q9BTV4	Q9BTV4 TMM43_HUMAN Transmembrane protein 43 OS=Homo sapiens OX=9606 GN=TMEM43 PE=1 SV=1	TMEM43	400	TMM43_HUMAN		1	0.999	15	21
P17931	P17931 LEG3_HUMAN Galectin-3 OS=Homo sapiens OX=9606 GN=LGALS3 PE=1 SV=5	LGALS3	250	LEG3_HUMAN		1	0.999	7	20
Q96QK1	Q96QK1 VPS35_HUMAN Vacuolar protein sorting-associated protein 35 OS=Homo sapiens OX=9606 GN=VPS35 PE=1 SV=2	VPS35	796	VPS35_HUMAN		1	0.999	22	20
Q13347	Q13347 EIF3I_HUMAN Eukaryotic translation initiation factor 3 subunit I OS=Homo sapiens OX=9606 GN=EIF3I PE=1 SV=1	EIF3I	325	EIF3I_HUMAN		1	0.999	15	20
Q9UHX1-2	Q9UHX1-2 PUF60_HUMAN Isoform 2 of Poly(U)-binding-splicing factor PUF60 OS=Homo sapiens OX=9606 GN=PUF60	PUF60	542	PUF60_HUMAN	Q9UHX1-4, Q9UHX1-6	1	0.999	13	20
Q13126-4	Q13126-4 MTAP_HUMAN Isoform 4 of S-methyl-5'-thioadenosine phosphorylase OS=Homo sapiens OX=9606 GN=MTAP	MTAP	280	MTAP_HUMAN		1	0.999	10	19
P60660-2	P60660-2 MYL6_HUMAN Isoform Smooth muscle of Myosin light polypeptide 6 OS=Homo sapiens OX=9606 GN=MYL6	MYL6	151	MYL6_HUMAN		1	0.999	13	16
P53004	P53004 BIEA_HUMAN Biliverdin reductase A OS=Homo sapiens OX=9606 GN=BLVRA PE=1 SV=2	BLVRA	296	BIEA_HUMAN		1	0.999	12	16
P62714	P62714 PP2AB_HUMAN Serine/threonine-protein phosphatase 2A catalytic subunit beta isoform OS=Homo sapiens OX=9606 GN=PPP2CB PE=1 SV=1	PPP2CB	309	PP2AB_HUMAN		1	0.999	11	14
P46776	P46776 RL27A_HUMAN 60S ribosomal protein L27a OS=Homo sapiens OX=9606 GN=RPL27A PE=1 SV=2	RPL27A	148	RL27A_HUMAN		1	0.999	8	12
P31937	P31937 3HIDH_HUMAN 3-hydroxyisobutyrate dehydrogenase, mitochondrial OS=Homo sapiens OX=9606 GN=HIBADH PE=1 SV=2	HIBADH	336	3HIDH_HUMAN		1	0.999	10	12
Q15185-4	Q15185-4 TEBP_HUMAN Isoform 4 of Prostaglandin E synthase 3 OS=Homo sapiens OX=9606 GN=PTGES3	PTGES3	139	TEBP_HUMAN		1	0.999	8	12
P51648	P51648 AL3A2_HUMAN Fatty aldehyde dehydrogenase OS=Homo sapiens OX=9606 GN=ALDH3A2 PE=1 SV=1	ALDH3A2	485	AL3A2_HUMAN	P51648-2	1	0.999	11	12
Q99497	Q99497 PARK7_HUMAN Protein/nucleic acid deglycase DJ-1 OS=Homo sapiens OX=9606 GN=PARK7 PE=1 SV=2	PARK7	189	PARK7_HUMAN		1	0.999	11	10
P00441	P00441 SODC_HUMAN Superoxide dismutase [Cu-Zn] OS=Homo sapiens OX=9606 GN=SOD1 PE=1 SV=2	SOD1	154	SODC_HUMAN		1	0.999	6	10
Q9Y4R8	Q9Y4R8 TELO2_HUMAN Telomere length regulation protein TEL2 homolog OS=Homo sapiens OX=9606 GN=TELO2 PE=1 SV=2	TELO2	837	TELO2_HUMAN		1	0.999	15	9
Q08554-2	Q08554-2 DSC1_HUMAN Isoform 1B of Desmocollin-1 OS=Homo sapiens OX=9606 GN=DSC1	DSC1	840	DSC1_HUMAN		1	0.999	18	5
Q9H0S4	Q9H0S4 DDX47_HUMAN Probable ATP-dependent RNA helicase DDX47 OS=Homo sapiens OX=9606 GN=DDX47 PE=1 SV=1	DDX47	455	DDX47_HUMAN		1	0.999	11	4
Q13423	Q13423 NNTM_HUMAN NAD(P) transhydrogenase, mitochondrial OS=Homo sapiens OX=9606 GN=NNT PE=1 SV=3	NNT	1086	NNTM_HUMAN		1	0.999	15	3
Q99729-2	Q99729-2 ROAA_HUMAN Isoform 2 of Heterogeneous nuclear ribonucleoprotein A/B OS=Homo sapiens OX=9606 GN=HNRNPAB	HNRNPAB	332	ROAA_HUMAN	Q99729-3	1	0.999	14	37
P32119	P32119 PRDX2_HUMAN Peroxiredoxin-2 OS=Homo sapiens OX=9606 GN=PRDX2 PE=1 SV=5	PRDX2	198	PRDX2_HUMAN		1	0.999	17	34
P47756-2	P47756-2 CAPZB_HUMAN Isoform 2 of F-actin-capping protein subunit beta OS=Homo sapiens OX=9606 GN=CAPZB	CAPZB	272	CAPZB_HUMAN		1	0.999	18	33
Q13885	Q13885 TBB2A_HUMAN Tubulin beta-2A chain OS=Homo sapiens OX=9606 GN=TUBB2A PE=1 SV=1	TUBB2A	445	TBB2A_HUMAN		1	0.999	30	31
P46782	P46782 RS5_HUMAN 40S ribosomal protein S5 OS=Homo sapiens OX=9606 GN=RPS5 PE=1 SV=4	RPS5	204	RS5_HUMAN		1	0.999	13	31
O60762	O60762 DPM1_HUMAN Dolichol-phosphate mannosyltransferase subunit 1 OS=Homo sapiens OX=9606 GN=DPM1 PE=1 SV=1	DPM1	260	DPM1_HUMAN		1	0.999	16	21
P68371	P68371 TBB4B_HUMAN Tubulin beta-4B chain OS=Homo sapiens OX=9606 GN=TUBB4B PE=1 SV=1	TUBB4B	445	TBB4B_HUMAN		0.9999	0.999	31	20
P40937	P40937 RFC5_HUMAN Replication factor C subunit 5 OS=Homo sapiens OX=9606 GN=RFC5 PE=1 SV=1	RFC5	340	RFC5_HUMAN	P40937-2	1	0.999	13	20
P42677	P42677 RS27_HUMAN 40S ribosomal protein S27 OS=Homo sapiens OX=9606 GN=RPS27 PE=1 SV=3	RPS27	84	RS27_HUMAN		1	0.999	6	19
P0DN76	P0DN76 U2AF5_HUMAN Splicing factor U2AF 35 kDa subunit-like protein OS=Homo sapiens OX=9606 GN=U2AF1L5 PE=1 SV=1	U2AF1L5	240	U2AF5_HUMAN	Q01081	1	0.999	9	17
Q07955	Q07955 SRSF1_HUMAN Serine/arginine-rich splicing factor 1 OS=Homo sapiens OX=9606 GN=SRSF1 PE=1 SV=2	SRSF1	248	SRSF1_HUMAN		1	0.999	11	16
P07339	P07339 CATD_HUMAN Cathepsin D OS=Homo sapiens OX=9606 GN=CTSD PE=1 SV=1	CTSD	412	CATD_HUMAN		1	0.999	14	14
P61604	P61604 CH10_HUMAN 10 kDa heat shock protein, mitochondrial OS=Homo sapiens OX=9606 GN=HSPE1 PE=1 SV=2	HSPE1	102	CH10_HUMAN		1	0.999	11	13
P15170-2	P15170-2 ERF3A_HUMAN Isoform 2 of Eukaryotic peptide chain release factor GTP-binding subunit ERF3A OS=Homo sapiens OX=9606 GN=GSPT1	GSPT1	636	ERF3A_HUMAN	P15170-3	1	0.999	18	13
O75131	O75131 CPNE3_HUMAN Copine-3 OS=Homo sapiens OX=9606 GN=CPNE3 PE=1 SV=1	CPNE3	537	CPNE3_HUMAN		1	0.999	15	13
Q8TCS8	Q8TCS8 PNPT1_HUMAN Polyribonucleotide nucleotidyltransferase 1, mitochondrial OS=Homo sapiens OX=9606 GN=PNPT1 PE=1 SV=2	PNPT1	783	PNPT1_HUMAN		1	0.999	17	11
P67870	P67870 CSK2B_HUMAN Casein kinase II subunit beta OS=Homo sapiens OX=9606 GN=CSNK2B PE=1 SV=1	CSNK2B	215	CSK2B_HUMAN		1	0.999	7	10
P42126	P42126 ECI1_HUMAN Enoyl-CoA delta isomerase 1, mitochondrial OS=Homo sapiens OX=9606 GN=ECI1 PE=1 SV=1	ECI1	302	ECI1_HUMAN		1	0.999	7	10
P62854	P62854 RS26_HUMAN 40S ribosomal protein S26 OS=Homo sapiens OX=9606 GN=RPS26 PE=1 SV=3	RPS26	115	RS26_HUMAN		1	0.999	3	9
P13073	P13073 COX41_HUMAN Cytochrome c oxidase subunit 4 isoform 1, mitochondrial OS=Homo sapiens OX=9606 GN=COX4I1 PE=1 SV=1	COX4I1	169	COX41_HUMAN		1	0.999	8	9
Q15717	Q15717 ELAV1_HUMAN ELAV-like protein 1 OS=Homo sapiens OX=9606 GN=ELAVL1 PE=1 SV=2	ELAVL1	326	ELAV1_HUMAN	Q15717-2	1	0.999	11	9
P00492	P00492 HPRT_HUMAN Hypoxanthine-guanine phosphoribosyltransferase OS=Homo sapiens OX=9606 GN=HPRT1 PE=1 SV=2	HPRT1	218	HPRT_HUMAN		1	0.999	12	8
Q7L0Y3	Q7L0Y3 TM10C_HUMAN tRNA methyltransferase 10 homolog C OS=Homo sapiens OX=9606 GN=TRMT10C PE=1 SV=2	TRMT10C	403	TM10C_HUMAN		1	0.999	13	7
Q92552	Q92552 RT27_HUMAN 28S ribosomal protein S27, mitochondrial OS=Homo sapiens OX=9606 GN=MRPS27 PE=1 SV=3	MRPS27	414	RT27_HUMAN	Q92552-2	1	0.999	15	7
Q5D862	Q5D862 FILA2_HUMAN Filaggrin-2 OS=Homo sapiens OX=9606 GN=FLG2 PE=1 SV=1	FLG2	2391	FILA2_HUMAN		1	0.999	14	1
O00178	O00178 GTPB1_HUMAN GTP-binding protein 1 OS=Homo sapiens OX=9606 GN=GTPBP1 PE=1 SV=3	GTPBP1	669	GTPB1_HUMAN		1	0.999	13	1
P07099	P07099 HYEP_HUMAN Epoxide hydrolase 1 OS=Homo sapiens OX=9606 GN=EPHX1 PE=1 SV=1	EPHX1	455	HYEP_HUMAN		1	0.999	21	35
Q9H9B4	Q9H9B4 SFXN1_HUMAN Sideroflexin-1 OS=Homo sapiens OX=9606 GN=SFXN1 PE=1 SV=4	SFXN1	322	SFXN1_HUMAN		1	0.999	12	33
P33176	P33176 KINH_HUMAN Kinesin-1 heavy chain OS=Homo sapiens OX=9606 GN=KIF5B PE=1 SV=1	KIF5B	963	KINH_HUMAN		1	0.999	33	16
P26373	P26373 RL13_HUMAN 60S ribosomal protein L13 OS=Homo sapiens OX=9606 GN=RPL13 PE=1 SV=4	RPL13	211	RL13_HUMAN		1	0.999	12	16
Q01105-2	Q01105-2 SET_HUMAN Isoform 2 of Protein SET OS=Homo sapiens OX=9606 GN=SET	SET	277	SET_HUMAN		1	0.999	11	14
O43396	O43396 TXNL1_HUMAN Thioredoxin-like protein 1 OS=Homo sapiens OX=9606 GN=TXNL1 PE=1 SV=3	TXNL1	289	TXNL1_HUMAN		1	0.999	10	14
Q9Y6K5	Q9Y6K5 OAS3_HUMAN 2'-5'-oligoadenylate synthase 3 OS=Homo sapiens OX=9606 GN=OAS3 PE=1 SV=3	OAS3	1087	OAS3_HUMAN		1	0.999	26	13
Q9Y5M8	Q9Y5M8 SRPRB_HUMAN Signal recognition particle receptor subunit beta OS=Homo sapiens OX=9606 GN=SRPRB PE=1 SV=3	SRPRB	271	SRPRB_HUMAN		1	0.999	9	11
P42766	P42766 RL35_HUMAN 60S ribosomal protein L35 OS=Homo sapiens OX=9606 GN=RPL35 PE=1 SV=2	RPL35	123	RL35_HUMAN		1	0.999	6	10
P56537	P56537 IF6_HUMAN Eukaryotic translation initiation factor 6 OS=Homo sapiens OX=9606 GN=EIF6 PE=1 SV=1	EIF6	245	IF6_HUMAN		1	0.999	9	10
O75569	O75569 PRKRA_HUMAN Interferon-inducible double-stranded RNA-dependent protein kinase activator A OS=Homo sapiens OX=9606 GN=PRKRA PE=1 SV=1	PRKRA	313	PRKRA_HUMAN		1	0.999	8	10
Q9Y263	Q9Y263 PLAP_HUMAN Phospholipase A-2-activating protein OS=Homo sapiens OX=9606 GN=PLAA PE=1 SV=2	PLAA	795	PLAP_HUMAN		1	0.999	22	9
P61513	P61513 RL37A_HUMAN 60S ribosomal protein L37a OS=Homo sapiens OX=9606 GN=RPL37A PE=1 SV=2	RPL37A	92	RL37A_HUMAN		1	0.999	7	8
Q9H8H3	Q9H8H3 MET7A_HUMAN Methyltransferase-like protein 7A OS=Homo sapiens OX=9606 GN=METTL7A PE=1 SV=1	METTL7A	244	MET7A_HUMAN		1	0.999	9	8
Q9Y394	Q9Y394 DHRS7_HUMAN Dehydrogenase/reductase SDR family member 7 OS=Homo sapiens OX=9606 GN=DHRS7 PE=1 SV=1	DHRS7	339	DHRS7_HUMAN		1	0.999	10	8
Q9NYK5	Q9NYK5 RM39_HUMAN 39S ribosomal protein L39, mitochondrial OS=Homo sapiens OX=9606 GN=MRPL39 PE=1 SV=3	MRPL39	338	RM39_HUMAN	Q9NYK5-2	1	0.999	12	8
P50914	P50914 RL14_HUMAN 60S ribosomal protein L14 OS=Homo sapiens OX=9606 GN=RPL14 PE=1 SV=4	RPL14	215	RL14_HUMAN		1	0.999	8	7
P23258	P23258 TBG1_HUMAN Tubulin gamma-1 chain OS=Homo sapiens OX=9606 GN=TUBG1 PE=1 SV=2	TUBG1	451	TBG1_HUMAN		1	0.999	19	6
Q9NUQ8	Q9NUQ8 ABCF3_HUMAN ATP-binding cassette sub-family F member 3 OS=Homo sapiens OX=9606 GN=ABCF3 PE=1 SV=2	ABCF3	709	ABCF3_HUMAN	Q9NUQ8-2	1	0.999	13	6
Q13410	Q13410 BT1A1_HUMAN Butyrophilin subfamily 1 member A1 OS=Homo sapiens OX=9606 GN=BTN1A1 PE=1 SV=3	BTN1A1	526	BT1A1_HUMAN		1	0.999	7	5
Q9BQ52	Q9BQ52 RNZ2_HUMAN Zinc phosphodiesterase ELAC protein 2 OS=Homo sapiens OX=9606 GN=ELAC2 PE=1 SV=2	ELAC2	826	RNZ2_HUMAN	Q9BQ52-4	1	0.999	9	3
P31944	P31944 CASPE_HUMAN Caspase-14 OS=Homo sapiens OX=9606 GN=CASP14 PE=1 SV=2	CASP14	242	CASPE_HUMAN		1	0.999	19	2
Q1KMD3	Q1KMD3 HNRL2_HUMAN Heterogeneous nuclear ribonucleoprotein U-like protein 2 OS=Homo sapiens OX=9606 GN=HNRNPUL2 PE=1 SV=1	HNRNPUL2	747	HNRL2_HUMAN		1	0.999	15	2
Q15126	Q15126 PMVK_HUMAN Phosphomevalonate kinase OS=Homo sapiens OX=9606 GN=PMVK PE=1 SV=3	PMVK	192	PMVK_HUMAN		1	0.999	13	2
Q9Y2Z4	Q9Y2Z4 SYYM_HUMAN Tyrosine--tRNA ligase, mitochondrial OS=Homo sapiens OX=9606 GN=YARS2 PE=1 SV=2	YARS2	477	SYYM_HUMAN		1	0.999	9	2
Q9BYG3	Q9BYG3 MK67I_HUMAN MKI67 FHA domain-interacting nucleolar phosphoprotein OS=Homo sapiens OX=9606 GN=NIFK PE=1 SV=1	NIFK	293	MK67I_HUMAN		1	0.999	8	2
Q8IWA0	Q8IWA0 WDR75_HUMAN WD repeat-containing protein 75 OS=Homo sapiens OX=9606 GN=WDR75 PE=1 SV=1	WDR75	830	WDR75_HUMAN		1	0.999	19	1
Q9Y2R4	Q9Y2R4 DDX52_HUMAN Probable ATP-dependent RNA helicase DDX52 OS=Homo sapiens OX=9606 GN=DDX52 PE=1 SV=3	DDX52	599	DDX52_HUMAN		1	0.999	12	1
P54577	P54577 SYYC_HUMAN Tyrosine--tRNA ligase, cytoplasmic OS=Homo sapiens OX=9606 GN=YARS PE=1 SV=4	YARS	528	SYYC_HUMAN		1	0.999	30	31
Q6IBS0	Q6IBS0 TWF2_HUMAN Twinfilin-2 OS=Homo sapiens OX=9606 GN=TWF2 PE=1 SV=2	TWF2	349	TWF2_HUMAN		1	0.999	18	25
Q9Y6C9	Q9Y6C9 MTCH2_HUMAN Mitochondrial carrier homolog 2 OS=Homo sapiens OX=9606 GN=MTCH2 PE=1 SV=1	MTCH2	303	MTCH2_HUMAN		1	0.999	13	23
P00403	P00403 COX2_HUMAN Cytochrome c oxidase subunit 2 OS=Homo sapiens OX=9606 GN=MT-CO2 PE=1 SV=1	MT-CO2	227	COX2_HUMAN		1	0.999	7	21
P61981	P61981 1433G_HUMAN 14-3-3 protein gamma OS=Homo sapiens OX=9606 GN=YWHAG PE=1 SV=2	YWHAG	247	1433G_HUMAN		1	0.999	19	20
P37837	P37837 TALDO_HUMAN Transaldolase OS=Homo sapiens OX=9606 GN=TALDO1 PE=1 SV=2	TALDO1	337	TALDO_HUMAN		1	0.999	17	20
O43615	O43615 TIM44_HUMAN Mitochondrial import inner membrane translocase subunit TIM44 OS=Homo sapiens OX=9606 GN=TIMM44 PE=1 SV=2	TIMM44	452	TIM44_HUMAN		1	0.999	16	18
P39687	P39687 AN32A_HUMAN Acidic leucine-rich nuclear phosphoprotein 32 family member A OS=Homo sapiens OX=9606 GN=ANP32A PE=1 SV=1	ANP32A	249	AN32A_HUMAN		1	0.999	12	17
P25788	P25788 PSA3_HUMAN Proteasome subunit alpha type-3 OS=Homo sapiens OX=9606 GN=PSMA3 PE=1 SV=2	PSMA3	255	PSA3_HUMAN	P25788-2	1	0.999	10	16
P46063	P46063 RECQ1_HUMAN ATP-dependent DNA helicase Q1 OS=Homo sapiens OX=9606 GN=RECQL PE=1 SV=3	RECQL	649	RECQ1_HUMAN		1	0.999	25	15
Q96A33	Q96A33 CCD47_HUMAN Coiled-coil domain-containing protein 47 OS=Homo sapiens OX=9606 GN=CCDC47 PE=1 SV=1	CCDC47	483	CCD47_HUMAN		1	0.999	17	15
P52294	P52294 IMA5_HUMAN Importin subunit alpha-5 OS=Homo sapiens OX=9606 GN=KPNA1 PE=1 SV=3	KPNA1	538	IMA5_HUMAN		1	0.999	10	14
O00116	O00116 ADAS_HUMAN Alkyldihydroxyacetonephosphate synthase, peroxisomal OS=Homo sapiens OX=9606 GN=AGPS PE=1 SV=1	AGPS	658	ADAS_HUMAN		1	0.999	15	14
P12235	P12235 ADT1_HUMAN ADP/ATP translocase 1 OS=Homo sapiens OX=9606 GN=SLC25A4 PE=1 SV=4	SLC25A4	298	ADT1_HUMAN		1	0.999	22	13
Q92820	Q92820 GGH_HUMAN Gamma-glutamyl hydrolase OS=Homo sapiens OX=9606 GN=GGH PE=1 SV=2	GGH	318	GGH_HUMAN		1	0.999	9	10
Q6UXN9	Q6UXN9 WDR82_HUMAN WD repeat-containing protein 82 OS=Homo sapiens OX=9606 GN=WDR82 PE=1 SV=1	WDR82	313	WDR82_HUMAN		1	0.999	9	10
Q15436	Q15436 SC23A_HUMAN Protein transport protein Sec23A OS=Homo sapiens OX=9606 GN=SEC23A PE=1 SV=2	SEC23A	765	SC23A_HUMAN		1	0.999	12	9
Q8NBJ5	Q8NBJ5 GT251_HUMAN Procollagen galactosyltransferase 1 OS=Homo sapiens OX=9606 GN=COLGALT1 PE=1 SV=1	COLGALT1	622	GT251_HUMAN		1	0.999	16	8
P30566	P30566 PUR8_HUMAN Adenylosuccinate lyase OS=Homo sapiens OX=9606 GN=ADSL PE=1 SV=2	ADSL	484	PUR8_HUMAN		1	0.999	10	8
Q9P015	Q9P015 RM15_HUMAN 39S ribosomal protein L15, mitochondrial OS=Homo sapiens OX=9606 GN=MRPL15 PE=1 SV=1	MRPL15	296	RM15_HUMAN		1	0.999	13	8
Q9BZE1	Q9BZE1 RM37_HUMAN 39S ribosomal protein L37, mitochondrial OS=Homo sapiens OX=9606 GN=MRPL37 PE=1 SV=2	MRPL37	423	RM37_HUMAN		1	0.999	11	7
Q8WUY1	Q8WUY1 THEM6_HUMAN Protein THEM6 OS=Homo sapiens OX=9606 GN=THEM6 PE=1 SV=2	THEM6	208	THEM6_HUMAN		1	0.999	9	7
P18077	P18077 RL35A_HUMAN 60S ribosomal protein L35a OS=Homo sapiens OX=9606 GN=RPL35A PE=1 SV=2	RPL35A	110	RL35A_HUMAN		1	0.999	9	5
P31749	P31749 AKT1_HUMAN RAC-alpha serine/threonine-protein kinase OS=Homo sapiens OX=9606 GN=AKT1 PE=1 SV=2	AKT1	480	AKT1_HUMAN		1	0.999	11	5
P25311	P25311 ZA2G_HUMAN Zinc-alpha-2-glycoprotein OS=Homo sapiens OX=9606 GN=AZGP1 PE=1 SV=2	AZGP1	298	ZA2G_HUMAN		1	0.999	17	4
P62304	P62304 RUXE_HUMAN Small nuclear ribonucleoprotein E OS=Homo sapiens OX=9606 GN=SNRPE PE=1 SV=1	SNRPE	92	RUXE_HUMAN		1	0.999	4	4
O00264	O00264 PGRC1_HUMAN Membrane-associated progesterone receptor component 1 OS=Homo sapiens OX=9606 GN=PGRMC1 PE=1 SV=3	PGRMC1	195	PGRC1_HUMAN		1	0.999	12	4
P54753	P54753 EPHB3_HUMAN Ephrin type-B receptor 3 OS=Homo sapiens OX=9606 GN=EPHB3 PE=1 SV=2	EPHB3	998	EPHB3_HUMAN		1	0.999	15	4
P42285	P42285 MTREX_HUMAN Exosome RNA helicase MTR4 OS=Homo sapiens OX=9606 GN=MTREX PE=1 SV=3	MTREX	1042	MTREX_HUMAN		1	0.999	14	3
P49406	P49406 RM19_HUMAN 39S ribosomal protein L19, mitochondrial OS=Homo sapiens OX=9606 GN=MRPL19 PE=1 SV=2	MRPL19	292	RM19_HUMAN		1	0.999	8	3
Q96SB4	Q96SB4 SRPK1_HUMAN SRSF protein kinase 1 OS=Homo sapiens OX=9606 GN=SRPK1 PE=1 SV=2	SRPK1	655	SRPK1_HUMAN	Q96SB4-3, Q96SB4-4	1	0.999	14	3
P13995	P13995 MTDC_HUMAN Bifunctional methylenetetrahydrofolate dehydrogenase/cyclohydrolase, mitochondrial OS=Homo sapiens OX=9606 GN=MTHFD2 PE=1 SV=2	MTHFD2	350	MTDC_HUMAN		1	0.999	10	1
P53582	P53582 MAP11_HUMAN Methionine aminopeptidase 1 OS=Homo sapiens OX=9606 GN=METAP1 PE=1 SV=2	METAP1	386	MAP11_HUMAN		1	0.999	10	1
P20618	P20618 PSB1_HUMAN Proteasome subunit beta type-1 OS=Homo sapiens OX=9606 GN=PSMB1 PE=1 SV=2	PSMB1	241	PSB1_HUMAN		1	0.999	10	20
Q9UBM7	Q9UBM7 DHCR7_HUMAN 7-dehydrocholesterol reductase OS=Homo sapiens OX=9606 GN=DHCR7 PE=1 SV=1	DHCR7	475	DHCR7_HUMAN		1	0.999	8	19
P35244	P35244 RFA3_HUMAN Replication protein A 14 kDa subunit OS=Homo sapiens OX=9606 GN=RPA3 PE=1 SV=1	RPA3	121	RFA3_HUMAN		1	0.999	7	16
P11387	P11387 TOP1_HUMAN DNA topoisomerase 1 OS=Homo sapiens OX=9606 GN=TOP1 PE=1 SV=2	TOP1	765	TOP1_HUMAN		1	0.999	20	16
O00487	O00487 PSDE_HUMAN 26S proteasome non-ATPase regulatory subunit 14 OS=Homo sapiens OX=9606 GN=PSMD14 PE=1 SV=1	PSMD14	310	PSDE_HUMAN		1	0.999	10	16
Q13177	Q13177 PAK2_HUMAN Serine/threonine-protein kinase PAK 2 OS=Homo sapiens OX=9606 GN=PAK2 PE=1 SV=3	PAK2	524	PAK2_HUMAN		1	0.999	18	13
O14787-2	O14787-2 TNPO2_HUMAN Isoform 2 of Transportin-2 OS=Homo sapiens OX=9606 GN=TNPO2	TNPO2	887	TNPO2_HUMAN		1	0.999	16	12
O14880	O14880 MGST3_HUMAN Microsomal glutathione S-transferase 3 OS=Homo sapiens OX=9606 GN=MGST3 PE=1 SV=1	MGST3	152	MGST3_HUMAN		1	0.999	7	12
Q9UI26	Q9UI26 IPO11_HUMAN Importin-11 OS=Homo sapiens OX=9606 GN=IPO11 PE=1 SV=1	IPO11	975	IPO11_HUMAN	Q9UI26-2	1	0.999	9	10
P49257	P49257 LMAN1_HUMAN Protein ERGIC-53 OS=Homo sapiens OX=9606 GN=LMAN1 PE=1 SV=2	LMAN1	510	LMAN1_HUMAN		1	0.999	14	8
P35249	P35249 RFC4_HUMAN Replication factor C subunit 4 OS=Homo sapiens OX=9606 GN=RFC4 PE=1 SV=2	RFC4	363	RFC4_HUMAN		1	0.999	11	8
P0DOX7	P0DOX7 IGK_HUMAN Immunoglobulin kappa light chain OS=Homo sapiens OX=9606 PE=1 SV=1		214	IGK_HUMAN		1	0.999	7	7
P35659	P35659 DEK_HUMAN Protein DEK OS=Homo sapiens OX=9606 GN=DEK PE=1 SV=1	DEK	375	DEK_HUMAN		1	0.999	15	6
Q13895	Q13895 BYST_HUMAN Bystin OS=Homo sapiens OX=9606 GN=BYSL PE=1 SV=3	BYSL	437	BYST_HUMAN		1	0.999	14	6
Q0VDF9	Q0VDF9 HSP7E_HUMAN Heat shock 70 kDa protein 14 OS=Homo sapiens OX=9606 GN=HSPA14 PE=1 SV=1	HSPA14	509	HSP7E_HUMAN		1	0.999	10	6
P15311	P15311 EZRI_HUMAN Ezrin OS=Homo sapiens OX=9606 GN=EZR PE=1 SV=4	EZR	586	EZRI_HUMAN		1	0.999	23	5
P35268	P35268 RL22_HUMAN 60S ribosomal protein L22 OS=Homo sapiens OX=9606 GN=RPL22 PE=1 SV=2	RPL22	128	RL22_HUMAN		1	0.999	5	5
P06702	P06702 S10A9_HUMAN Protein S100-A9 OS=Homo sapiens OX=9606 GN=S100A9 PE=1 SV=1	S100A9	114	S10A9_HUMAN		1	0.999	8	4
Q13547	Q13547 HDAC1_HUMAN Histone deacetylase 1 OS=Homo sapiens OX=9606 GN=HDAC1 PE=1 SV=1	HDAC1	482	HDAC1_HUMAN		1	0.999	11	4
Q9UJV9	Q9UJV9 DDX41_HUMAN Probable ATP-dependent RNA helicase DDX41 OS=Homo sapiens OX=9606 GN=DDX41 PE=1 SV=2	DDX41	622	DDX41_HUMAN		1	0.999	16	4
Q9NYY8	Q9NYY8 FAKD2_HUMAN FAST kinase domain-containing protein 2, mitochondrial OS=Homo sapiens OX=9606 GN=FASTKD2 PE=1 SV=1	FASTKD2	710	FAKD2_HUMAN	Q9NYY8-2	1	0.999	10	4
P48729-3	P48729-3 KC1A_HUMAN Isoform 3 of Casein kinase I isoform alpha OS=Homo sapiens OX=9606 GN=CSNK1A1	CSNK1A1	325	KC1A_HUMAN		1	0.999	7	3
Q7L014	Q7L014 DDX46_HUMAN Probable ATP-dependent RNA helicase DDX46 OS=Homo sapiens OX=9606 GN=DDX46 PE=1 SV=2	DDX46	1031	DDX46_HUMAN		1	0.999	15	2
P28340	P28340 DPOD1_HUMAN DNA polymerase delta catalytic subunit OS=Homo sapiens OX=9606 GN=POLD1 PE=1 SV=2	POLD1	1107	DPOD1_HUMAN		1	0.999	20	2
O75607	O75607 NPM3_HUMAN Nucleoplasmin-3 OS=Homo sapiens OX=9606 GN=NPM3 PE=1 SV=3	NPM3	178	NPM3_HUMAN		1	0.999	6	2
Q96GQ7	Q96GQ7 DDX27_HUMAN Probable ATP-dependent RNA helicase DDX27 OS=Homo sapiens OX=9606 GN=DDX27 PE=1 SV=2	DDX27	796	DDX27_HUMAN		1	0.999	11	2
P08123	P08123 CO1A2_HUMAN Collagen alpha-2(I) chain OS=Homo sapiens OX=9606 GN=COL1A2 PE=1 SV=7	COL1A2	1366	CO1A2_HUMAN		1	0.999	4	2
P20839-2	P20839-2 IMDH1_HUMAN Isoform 2 of Inosine-5'-monophosphate dehydrogenase 1 OS=Homo sapiens OX=9606 GN=IMPDH1	IMPDH1	489	IMDH1_HUMAN		1	0.999	10	1
P42166	P42166 LAP2A_HUMAN Lamina-associated polypeptide 2, isoform alpha OS=Homo sapiens OX=9606 GN=TMPO PE=1 SV=2	TMPO	694	LAP2A_HUMAN		1	0.999	30	54
Q9Y266	Q9Y266 NUDC_HUMAN Nuclear migration protein nudC OS=Homo sapiens OX=9606 GN=NUDC PE=1 SV=1	NUDC	331	NUDC_HUMAN		1	0.999	19	48
P67809	P67809 YBOX1_HUMAN Nuclease-sensitive element-binding protein 1 OS=Homo sapiens OX=9606 GN=YBX1 PE=1 SV=3	YBX1	324	YBOX1_HUMAN		1	0.999	12	47
Q9BVA1	Q9BVA1 TBB2B_HUMAN Tubulin beta-2B chain OS=Homo sapiens OX=9606 GN=TUBB2B PE=1 SV=1	TUBB2B	445	TBB2B_HUMAN		1	0.999	30	32
Q8NF37	Q8NF37 PCAT1_HUMAN Lysophosphatidylcholine acyltransferase 1 OS=Homo sapiens OX=9606 GN=LPCAT1 PE=1 SV=2	LPCAT1	534	PCAT1_HUMAN		1	0.999	15	30
O15144	O15144 ARPC2_HUMAN Actin-related protein 2/3 complex subunit 2 OS=Homo sapiens OX=9606 GN=ARPC2 PE=1 SV=1	ARPC2	300	ARPC2_HUMAN		1	0.999	19	28
P52292	P52292 IMA1_HUMAN Importin subunit alpha-1 OS=Homo sapiens OX=9606 GN=KPNA2 PE=1 SV=1	KPNA2	529	IMA1_HUMAN		1	0.999	14	24
P30040	P30040 ERP29_HUMAN Endoplasmic reticulum resident protein 29 OS=Homo sapiens OX=9606 GN=ERP29 PE=1 SV=4	ERP29	261	ERP29_HUMAN		1	0.999	10	22
P50502	P50502 F10A1_HUMAN Hsc70-interacting protein OS=Homo sapiens OX=9606 GN=ST13 PE=1 SV=2	ST13	369	F10A1_HUMAN		1	0.999	10	20
Q96P70	Q96P70 IPO9_HUMAN Importin-9 OS=Homo sapiens OX=9606 GN=IPO9 PE=1 SV=3	IPO9	1041	IPO9_HUMAN		1	0.999	19	19
Q14258	Q14258 TRI25_HUMAN E3 ubiquitin/ISG15 ligase TRIM25 OS=Homo sapiens OX=9606 GN=TRIM25 PE=1 SV=2	TRIM25	630	TRI25_HUMAN		1	0.999	18	18
P61163	P61163 ACTZ_HUMAN Alpha-centractin OS=Homo sapiens OX=9606 GN=ACTR1A PE=1 SV=1	ACTR1A	376	ACTZ_HUMAN		1	0.999	14	17
Q03252	Q03252 LMNB2_HUMAN Lamin-B2 OS=Homo sapiens OX=9606 GN=LMNB2 PE=1 SV=4	LMNB2	620	LMNB2_HUMAN		1	0.999	28	16
P09543	P09543 CN37_HUMAN 2',3'-cyclic-nucleotide 3'-phosphodiesterase OS=Homo sapiens OX=9606 GN=CNP PE=1 SV=2	CNP	421	CN37_HUMAN	P09543-2	1	0.999	16	16
Q9BUF5	Q9BUF5 TBB6_HUMAN Tubulin beta-6 chain OS=Homo sapiens OX=9606 GN=TUBB6 PE=1 SV=1	TUBB6	446	TBB6_HUMAN		1	0.999	24	14
O75083	O75083 WDR1_HUMAN WD repeat-containing protein 1 OS=Homo sapiens OX=9606 GN=WDR1 PE=1 SV=4	WDR1	606	WDR1_HUMAN		1	0.999	22	13
P18085	P18085 ARF4_HUMAN ADP-ribosylation factor 4 OS=Homo sapiens OX=9606 GN=ARF4 PE=1 SV=3	ARF4	180	ARF4_HUMAN		1	0.999	11	13
P26583	P26583 HMGB2_HUMAN High mobility group protein B2 OS=Homo sapiens OX=9606 GN=HMGB2 PE=1 SV=2	HMGB2	209	HMGB2_HUMAN		1	0.999	15	11
P18754	P18754 RCC1_HUMAN Regulator of chromosome condensation OS=Homo sapiens OX=9606 GN=RCC1 PE=1 SV=1	RCC1	421	RCC1_HUMAN	P18754-2	1	0.999	14	9
Q9Y2R9	Q9Y2R9 RT07_HUMAN 28S ribosomal protein S7, mitochondrial OS=Homo sapiens OX=9606 GN=MRPS7 PE=1 SV=2	MRPS7	242	RT07_HUMAN		1	0.999	8	9
Q99986	Q99986 VRK1_HUMAN Serine/threonine-protein kinase VRK1 OS=Homo sapiens OX=9606 GN=VRK1 PE=1 SV=1	VRK1	396	VRK1_HUMAN		1	0.999	11	8
P05413	P05413 FABPH_HUMAN Fatty acid-binding protein, heart OS=Homo sapiens OX=9606 GN=FABP3 PE=1 SV=4	FABP3	133	FABPH_HUMAN		1	0.999	10	7
Q9UH62	Q9UH62 ARMX3_HUMAN Armadillo repeat-containing X-linked protein 3 OS=Homo sapiens OX=9606 GN=ARMCX3 PE=1 SV=1	ARMCX3	379	ARMX3_HUMAN		1	0.999	9	7
P14174	P14174 MIF_HUMAN Macrophage migration inhibitory factor OS=Homo sapiens OX=9606 GN=MIF PE=1 SV=4	MIF	115	MIF_HUMAN		1	0.999	4	6
Q3SY84	Q3SY84 K2C71_HUMAN Keratin, type II cytoskeletal 71 OS=Homo sapiens OX=9606 GN=KRT71 PE=1 SV=3	KRT71	523	K2C71_HUMAN		1	0.999	23	5
Q9Y276	Q9Y276 BCS1_HUMAN Mitochondrial chaperone BCS1 OS=Homo sapiens OX=9606 GN=BCS1L PE=1 SV=1	BCS1L	419	BCS1_HUMAN		1	0.999	5	5
Q9Y295	Q9Y295 DRG1_HUMAN Developmentally-regulated GTP-binding protein 1 OS=Homo sapiens OX=9606 GN=DRG1 PE=1 SV=1	DRG1	367	DRG1_HUMAN		1	0.999	11	4
Q8N5K1	Q8N5K1 CISD2_HUMAN CDGSH iron-sulfur domain-containing protein 2 OS=Homo sapiens OX=9606 GN=CISD2 PE=1 SV=1	CISD2	135	CISD2_HUMAN		1	0.999	5	4
Q01780	Q01780 EXOSX_HUMAN Exosome component 10 OS=Homo sapiens OX=9606 GN=EXOSC10 PE=1 SV=2	EXOSC10	885	EXOSX_HUMAN	Q01780-2	1	0.999	8	4
Q6PI48	Q6PI48 SYDM_HUMAN Aspartate--tRNA ligase, mitochondrial OS=Homo sapiens OX=9606 GN=DARS2 PE=1 SV=1	DARS2	645	SYDM_HUMAN		1	0.999	15	3
Q5BJF2	Q5BJF2 SGMR2_HUMAN Sigma intracellular receptor 2 OS=Homo sapiens OX=9606 GN=TMEM97 PE=1 SV=1	TMEM97	176	SGMR2_HUMAN		1	0.999	4	3
Q16576	Q16576 RBBP7_HUMAN Histone-binding protein RBBP7 OS=Homo sapiens OX=9606 GN=RBBP7 PE=1 SV=1	RBBP7	425	RBBP7_HUMAN		1	0.999	13	3
Q9Y3E5	Q9Y3E5 PTH2_HUMAN Peptidyl-tRNA hydrolase 2, mitochondrial OS=Homo sapiens OX=9606 GN=PTRH2 PE=1 SV=1	PTRH2	179	PTH2_HUMAN		1	0.999	6	3
Q9Y5Q8	Q9Y5Q8 TF3C5_HUMAN General transcription factor 3C polypeptide 5 OS=Homo sapiens OX=9606 GN=GTF3C5 PE=1 SV=2	GTF3C5	519	TF3C5_HUMAN	Q9Y5Q8-3	1	0.999	11	3
P60033	P60033 CD81_HUMAN CD81 antigen OS=Homo sapiens OX=9606 GN=CD81 PE=1 SV=1	CD81	236	CD81_HUMAN		1	0.999	3	2
P62318	P62318 SMD3_HUMAN Small nuclear ribonucleoprotein Sm D3 OS=Homo sapiens OX=9606 GN=SNRPD3 PE=1 SV=1	SNRPD3	126	SMD3_HUMAN	P62318-2	1	0.999	3	2
Q15020	Q15020 SART3_HUMAN Squamous cell carcinoma antigen recognized by T-cells 3 OS=Homo sapiens OX=9606 GN=SART3 PE=1 SV=1	SART3	963	SART3_HUMAN		1	0.999	13	2
P01024	P01024 CO3_HUMAN Complement C3 OS=Homo sapiens OX=9606 GN=C3 PE=1 SV=2	C3	1663	CO3_HUMAN		1	0.999	12	1
Q8IY81	Q8IY81 SPB1_HUMAN pre-rRNA 2'-O-ribose RNA methyltransferase FTSJ3 OS=Homo sapiens OX=9606 GN=FTSJ3 PE=1 SV=2	FTSJ3	847	SPB1_HUMAN		1	0.999	12	1
Q14554	Q14554 PDIA5_HUMAN Protein disulfide-isomerase A5 OS=Homo sapiens OX=9606 GN=PDIA5 PE=1 SV=1	PDIA5	519	PDIA5_HUMAN		1	0.999	9	1
P16189	P16189 1A31_HUMAN HLA class I histocompatibility antigen, A-31 alpha chain OS=Homo sapiens OX=9606 GN=HLA-A PE=1 SV=2	HLA-A	365	1A31_HUMAN		1	0.999	18	47
Q969V3	Q969V3 NCLN_HUMAN Nicalin OS=Homo sapiens OX=9606 GN=NCLN PE=1 SV=2	NCLN	563	NCLN_HUMAN	Q969V3-2	1	0.999	18	27
Q96AG4	Q96AG4 LRC59_HUMAN Leucine-rich repeat-containing protein 59 OS=Homo sapiens OX=9606 GN=LRRC59 PE=1 SV=1	LRRC59	307	LRC59_HUMAN		1	0.999	11	26
Q9Y696	Q9Y696 CLIC4_HUMAN Chloride intracellular channel protein 4 OS=Homo sapiens OX=9606 GN=CLIC4 PE=1 SV=4	CLIC4	253	CLIC4_HUMAN		1	0.999	17	25
O00299	O00299 CLIC1_HUMAN Chloride intracellular channel protein 1 OS=Homo sapiens OX=9606 GN=CLIC1 PE=1 SV=4	CLIC1	241	CLIC1_HUMAN		1	0.999	14	23
P0CG38	P0CG38 POTEI_HUMAN POTE ankyrin domain family member I OS=Homo sapiens OX=9606 GN=POTEI PE=3 SV=1	POTEI	1075	POTEI_HUMAN		1	0.999	15	21
Q9H3N1	Q9H3N1 TMX1_HUMAN Thioredoxin-related transmembrane protein 1 OS=Homo sapiens OX=9606 GN=TMX1 PE=1 SV=1	TMX1	280	TMX1_HUMAN		1	0.999	11	18
O43809	O43809 CPSF5_HUMAN Cleavage and polyadenylation specificity factor subunit 5 OS=Homo sapiens OX=9606 GN=NUDT21 PE=1 SV=1	NUDT21	227	CPSF5_HUMAN		1	0.999	9	16
O75821	O75821 EIF3G_HUMAN Eukaryotic translation initiation factor 3 subunit G OS=Homo sapiens OX=9606 GN=EIF3G PE=1 SV=2	EIF3G	320	EIF3G_HUMAN		1	0.999	11	16
Q96G23	Q96G23 CERS2_HUMAN Ceramide synthase 2 OS=Homo sapiens OX=9606 GN=CERS2 PE=1 SV=1	CERS2	380	CERS2_HUMAN		1	0.999	7	16
Q9H845	Q9H845 ACAD9_HUMAN Acyl-CoA dehydrogenase family member 9, mitochondrial OS=Homo sapiens OX=9606 GN=ACAD9 PE=1 SV=1	ACAD9	621	ACAD9_HUMAN		1	0.999	22	14
Q96BM9	Q96BM9 ARL8A_HUMAN ADP-ribosylation factor-like protein 8A OS=Homo sapiens OX=9606 GN=ARL8A PE=1 SV=1	ARL8A	186	ARL8A_HUMAN		1	0.999	10	14
P19784	P19784 CSK22_HUMAN Casein kinase II subunit alpha' OS=Homo sapiens OX=9606 GN=CSNK2A2 PE=1 SV=1	CSNK2A2	350	CSK22_HUMAN		1	0.999	15	14
O15031	O15031 PLXB2_HUMAN Plexin-B2 OS=Homo sapiens OX=9606 GN=PLXNB2 PE=1 SV=3	PLXNB2	1838	PLXB2_HUMAN		1	0.999	24	11
P28070	P28070 PSB4_HUMAN Proteasome subunit beta type-4 OS=Homo sapiens OX=9606 GN=PSMB4 PE=1 SV=4	PSMB4	264	PSB4_HUMAN		1	0.999	8	11
P49720	P49720 PSB3_HUMAN Proteasome subunit beta type-3 OS=Homo sapiens OX=9606 GN=PSMB3 PE=1 SV=2	PSMB3	205	PSB3_HUMAN		1	0.999	7	10
P49721	P49721 PSB2_HUMAN Proteasome subunit beta type-2 OS=Homo sapiens OX=9606 GN=PSMB2 PE=1 SV=1	PSMB2	201	PSB2_HUMAN		1	0.999	13	10
P49755	P49755 TMEDA_HUMAN Transmembrane emp24 domain-containing protein 10 OS=Homo sapiens OX=9606 GN=TMED10 PE=1 SV=2	TMED10	219	TMEDA_HUMAN		1	0.999	8	10
P09661	P09661 RU2A_HUMAN U2 small nuclear ribonucleoprotein A' OS=Homo sapiens OX=9606 GN=SNRPA1 PE=1 SV=2	SNRPA1	255	RU2A_HUMAN		1	0.999	11	10
Q15006	Q15006 EMC2_HUMAN ER membrane protein complex subunit 2 OS=Homo sapiens OX=9606 GN=EMC2 PE=1 SV=1	EMC2	297	EMC2_HUMAN		1	0.999	10	10
Q9Y6M9	Q9Y6M9 NDUB9_HUMAN NADH dehydrogenase [ubiquinone] 1 beta subcomplex subunit 9 OS=Homo sapiens OX=9606 GN=NDUFB9 PE=1 SV=3	NDUFB9	179	NDUB9_HUMAN		1	0.999	7	10
P62851	P62851 RS25_HUMAN 40S ribosomal protein S25 OS=Homo sapiens OX=9606 GN=RPS25 PE=1 SV=1	RPS25	125	RS25_HUMAN		1	0.999	4	9
P61769	P61769 B2MG_HUMAN Beta-2-microglobulin OS=Homo sapiens OX=9606 GN=B2M PE=1 SV=1	B2M	119	B2MG_HUMAN		1	0.999	4	9
P63173	P63173 RL38_HUMAN 60S ribosomal protein L38 OS=Homo sapiens OX=9606 GN=RPL38 PE=1 SV=2	RPL38	70	RL38_HUMAN		1	0.999	4	8
P20340-2	P20340-2 RAB6A_HUMAN Isoform 2 of Ras-related protein Rab-6A OS=Homo sapiens OX=9606 GN=RAB6A	RAB6A	208	RAB6A_HUMAN		0.9851	0.999	11	8
Q9P2B2	Q9P2B2 FPRP_HUMAN Prostaglandin F2 receptor negative regulator OS=Homo sapiens OX=9606 GN=PTGFRN PE=1 SV=2	PTGFRN	879	FPRP_HUMAN		1	0.999	18	8
Q9Y2T2	Q9Y2T2 AP3M1_HUMAN AP-3 complex subunit mu-1 OS=Homo sapiens OX=9606 GN=AP3M1 PE=1 SV=1	AP3M1	418	AP3M1_HUMAN		1	0.999	11	8
Q8IYQ7	Q8IYQ7 THNS1_HUMAN Threonine synthase-like 1 OS=Homo sapiens OX=9606 GN=THNSL1 PE=1 SV=2	THNSL1	743	THNS1_HUMAN		1	0.999	11	8
Q9NPF4	Q9NPF4 OSGEP_HUMAN Probable tRNA N6-adenosine threonylcarbamoyltransferase OS=Homo sapiens OX=9606 GN=OSGEP PE=1 SV=1	OSGEP	335	OSGEP_HUMAN		1	0.999	5	8
Q6DN03	Q6DN03 H2B2C_HUMAN Putative histone H2B type 2-C OS=Homo sapiens OX=9606 GN=HIST2H2BC PE=5 SV=3	HIST2H2BC	193	H2B2C_HUMAN	Q6DRA6	1	0.999	9	7
Q13867	Q13867 BLMH_HUMAN Bleomycin hydrolase OS=Homo sapiens OX=9606 GN=BLMH PE=1 SV=1	BLMH	455	BLMH_HUMAN		1	0.999	15	7
Q14019	Q14019 COTL1_HUMAN Coactosin-like protein OS=Homo sapiens OX=9606 GN=COTL1 PE=1 SV=3	COTL1	142	COTL1_HUMAN		1	0.999	9	7
Q15382	Q15382 RHEB_HUMAN GTP-binding protein Rheb OS=Homo sapiens OX=9606 GN=RHEB PE=1 SV=1	RHEB	184	RHEB_HUMAN		1	0.999	7	7
Q9BSD7	Q9BSD7 NTPCR_HUMAN Cancer-related nucleoside-triphosphatase OS=Homo sapiens OX=9606 GN=NTPCR PE=1 SV=1	NTPCR	190	NTPCR_HUMAN		1	0.999	8	7
P62314	P62314 SMD1_HUMAN Small nuclear ribonucleoprotein Sm D1 OS=Homo sapiens OX=9606 GN=SNRPD1 PE=1 SV=1	SNRPD1	119	SMD1_HUMAN		1	0.999	4	6
P12109	P12109 CO6A1_HUMAN Collagen alpha-1(VI) chain OS=Homo sapiens OX=9606 GN=COL6A1 PE=1 SV=3	COL6A1	1028	CO6A1_HUMAN		1	0.999	13	6
Q9BPX3	Q9BPX3 CND3_HUMAN Condensin complex subunit 3 OS=Homo sapiens OX=9606 GN=NCAPG PE=1 SV=1	NCAPG	1015	CND3_HUMAN		1	0.999	12	6
P04080	P04080 CYTB_HUMAN Cystatin-B OS=Homo sapiens OX=9606 GN=CSTB PE=1 SV=2	CSTB	98	CYTB_HUMAN		1	0.999	4	6
O14925	O14925 TIM23_HUMAN Mitochondrial import inner membrane translocase subunit Tim23 OS=Homo sapiens OX=9606 GN=TIMM23 PE=1 SV=1	TIMM23	209	TIM23_HUMAN		1	0.999	4	6
P05109	P05109 S10A8_HUMAN Protein S100-A8 OS=Homo sapiens OX=9606 GN=S100A8 PE=1 SV=1	S100A8	93	S10A8_HUMAN		1	0.999	11	4
P07686	P07686 HEXB_HUMAN Beta-hexosaminidase subunit beta OS=Homo sapiens OX=9606 GN=HEXB PE=1 SV=3	HEXB	556	HEXB_HUMAN		1	0.999	11	4
P02538	P02538 K2C6A_HUMAN Keratin, type II cytoskeletal 6A OS=Homo sapiens OX=9606 GN=KRT6A PE=1 SV=3	KRT6A	564	K2C6A_HUMAN		1	0.999	67	3
O75964	O75964 ATP5L_HUMAN ATP synthase subunit g, mitochondrial OS=Homo sapiens OX=9606 GN=ATP5MG PE=1 SV=3	ATP5MG	103	ATP5L_HUMAN		1	0.999	6	3
Q96EK5	Q96EK5 KBP_HUMAN KIF1-binding protein OS=Homo sapiens OX=9606 GN=KIF1BP PE=1 SV=1	KIF1BP	621	KBP_HUMAN		1	0.999	7	3
O75436	O75436 VP26A_HUMAN Vacuolar protein sorting-associated protein 26A OS=Homo sapiens OX=9606 GN=VPS26A PE=1 SV=2	VPS26A	327	VP26A_HUMAN		1	0.999	9	3
Q7Z2W9	Q7Z2W9 RM21_HUMAN 39S ribosomal protein L21, mitochondrial OS=Homo sapiens OX=9606 GN=MRPL21 PE=1 SV=2	MRPL21	205	RM21_HUMAN		1	0.999	4	3
P61626	P61626 LYSC_HUMAN Lysozyme C OS=Homo sapiens OX=9606 GN=LYZ PE=1 SV=1	LYZ	148	LYSC_HUMAN		1	0.999	8	2
Q96S44	Q96S44 PRPK_HUMAN EKC/KEOPS complex subunit TP53RK OS=Homo sapiens OX=9606 GN=TP53RK PE=1 SV=2	TP53RK	253	PRPK_HUMAN		1	0.999	5	2
Q8IWS0	Q8IWS0 PHF6_HUMAN PHD finger protein 6 OS=Homo sapiens OX=9606 GN=PHF6 PE=1 SV=1	PHF6	365	PHF6_HUMAN	Q8IWS0-3	1	0.999	8	2
Q15021	Q15021 CND1_HUMAN Condensin complex subunit 1 OS=Homo sapiens OX=9606 GN=NCAPD2 PE=1 SV=3	NCAPD2	1401	CND1_HUMAN		1	0.999	21	1
Q9Y5J1	Q9Y5J1 UTP18_HUMAN U3 small nucleolar RNA-associated protein 18 homolog OS=Homo sapiens OX=9606 GN=UTP18 PE=1 SV=3	UTP18	556	UTP18_HUMAN		1	0.999	11	1
Q13257	Q13257 MD2L1_HUMAN Mitotic spindle assembly checkpoint protein MAD2A OS=Homo sapiens OX=9606 GN=MAD2L1 PE=1 SV=1	MAD2L1	205	MD2L1_HUMAN		1	0.999	7	1
P05423	P05423 RPC4_HUMAN DNA-directed RNA polymerase III subunit RPC4 OS=Homo sapiens OX=9606 GN=POLR3D PE=1 SV=2	POLR3D	398	RPC4_HUMAN		1	0.999	6	1
P17301	P17301 ITA2_HUMAN Integrin alpha-2 OS=Homo sapiens OX=9606 GN=ITGA2 PE=1 SV=1	ITGA2	1181	ITA2_HUMAN		1	0.999	12	1
P19174	P19174 PLCG1_HUMAN 1-phosphatidylinositol 4,5-bisphosphate phosphodiesterase gamma-1 OS=Homo sapiens OX=9606 GN=PLCG1 PE=1 SV=1	PLCG1	1290	PLCG1_HUMAN	P19174-2	1	0.999	14	1
P11182	P11182 ODB2_HUMAN Lipoamide acyltransferase component of branched-chain alpha-keto acid dehydrogenase complex, mitochondrial OS=Homo sapiens OX=9606 GN=DBT PE=1 SV=3	DBT	482	ODB2_HUMAN		1	0.999	23	66
P31948	P31948 STIP1_HUMAN Stress-induced-phosphoprotein 1 OS=Homo sapiens OX=9606 GN=STIP1 PE=1 SV=1	STIP1	543	STIP1_HUMAN	P31948-2	1	0.999	24	49
P23921	P23921 RIR1_HUMAN Ribonucleoside-diphosphate reductase large subunit OS=Homo sapiens OX=9606 GN=RRM1 PE=1 SV=1	RRM1	792	RIR1_HUMAN		1	0.999	32	29
P61158	P61158 ARP3_HUMAN Actin-related protein 3 OS=Homo sapiens OX=9606 GN=ACTR3 PE=1 SV=3	ACTR3	418	ARP3_HUMAN		1	0.999	18	27
P60709	P60709 ACTB_HUMAN Actin, cytoplasmic 1 OS=Homo sapiens OX=9606 GN=ACTB PE=1 SV=1	ACTB	375	ACTB_HUMAN		1	0.999	49	26
Q6UX53	Q6UX53 MET7B_HUMAN Methyltransferase-like protein 7B OS=Homo sapiens OX=9606 GN=METTL7B PE=1 SV=2	METTL7B	244	MET7B_HUMAN		1	0.999	10	25
P08574	P08574 CY1_HUMAN Cytochrome c1, heme protein, mitochondrial OS=Homo sapiens OX=9606 GN=CYC1 PE=1 SV=3	CYC1	325	CY1_HUMAN		1	0.999	11	21
Q9UMS4	Q9UMS4 PRP19_HUMAN Pre-mRNA-processing factor 19 OS=Homo sapiens OX=9606 GN=PRPF19 PE=1 SV=1	PRPF19	504	PRP19_HUMAN		1	0.999	17	20
Q07960	Q07960 RHG01_HUMAN Rho GTPase-activating protein 1 OS=Homo sapiens OX=9606 GN=ARHGAP1 PE=1 SV=1	ARHGAP1	439	RHG01_HUMAN		1	0.999	15	17
Q99426	Q99426 TBCB_HUMAN Tubulin-folding cofactor B OS=Homo sapiens OX=9606 GN=TBCB PE=1 SV=2	TBCB	244	TBCB_HUMAN		1	0.999	9	17
P15104	P15104 GLNA_HUMAN Glutamine synthetase OS=Homo sapiens OX=9606 GN=GLUL PE=1 SV=4	GLUL	373	GLNA_HUMAN		1	0.999	12	16
P51571	P51571 SSRD_HUMAN Translocon-associated protein subunit delta OS=Homo sapiens OX=9606 GN=SSR4 PE=1 SV=1	SSR4	173	SSRD_HUMAN		1	0.999	4	16
Q13011	Q13011 ECH1_HUMAN Delta(3,5)-Delta(2,4)-dienoyl-CoA isomerase, mitochondrial OS=Homo sapiens OX=9606 GN=ECH1 PE=1 SV=2	ECH1	328	ECH1_HUMAN		1	0.999	9	16
Q15102	Q15102 PA1B3_HUMAN Platelet-activating factor acetylhydrolase IB subunit gamma OS=Homo sapiens OX=9606 GN=PAFAH1B3 PE=1 SV=1	PAFAH1B3	231	PA1B3_HUMAN		1	0.999	11	15
P61619	P61619 S61A1_HUMAN Protein transport protein Sec61 subunit alpha isoform 1 OS=Homo sapiens OX=9606 GN=SEC61A1 PE=1 SV=2	SEC61A1	476	S61A1_HUMAN		1	0.999	9	15
Q96HS1	Q96HS1 PGAM5_HUMAN Serine/threonine-protein phosphatase PGAM5, mitochondrial OS=Homo sapiens OX=9606 GN=PGAM5 PE=1 SV=2	PGAM5	289	PGAM5_HUMAN		1	0.999	12	15
Q15005	Q15005 SPCS2_HUMAN Signal peptidase complex subunit 2 OS=Homo sapiens OX=9606 GN=SPCS2 PE=1 SV=3	SPCS2	226	SPCS2_HUMAN		1	0.999	11	13
Q9P0J0	Q9P0J0 NDUAD_HUMAN NADH dehydrogenase [ubiquinone] 1 alpha subcomplex subunit 13 OS=Homo sapiens OX=9606 GN=NDUFA13 PE=1 SV=3	NDUFA13	144	NDUAD_HUMAN		1	0.999	8	13
O75477	O75477 ERLN1_HUMAN Erlin-1 OS=Homo sapiens OX=9606 GN=ERLIN1 PE=1 SV=1	ERLIN1	346	ERLN1_HUMAN		1	0.999	7	12
Q99829	Q99829 CPNE1_HUMAN Copine-1 OS=Homo sapiens OX=9606 GN=CPNE1 PE=1 SV=1	CPNE1	537	CPNE1_HUMAN		1	0.999	11	11
P61088	P61088 UBE2N_HUMAN Ubiquitin-conjugating enzyme E2 N OS=Homo sapiens OX=9606 GN=UBE2N PE=1 SV=1	UBE2N	152	UBE2N_HUMAN		1	0.999	8	10
Q9Y3U8	Q9Y3U8 RL36_HUMAN 60S ribosomal protein L36 OS=Homo sapiens OX=9606 GN=RPL36 PE=1 SV=3	RPL36	105	RL36_HUMAN		1	0.999	7	10
Q9Y3A5	Q9Y3A5 SBDS_HUMAN Ribosome maturation protein SBDS OS=Homo sapiens OX=9606 GN=SBDS PE=1 SV=4	SBDS	250	SBDS_HUMAN		1	0.999	8	10
Q16563	Q16563 SYPL1_HUMAN Synaptophysin-like protein 1 OS=Homo sapiens OX=9606 GN=SYPL1 PE=1 SV=1	SYPL1	259	SYPL1_HUMAN	Q16563-2	1	0.999	3	10
Q7L5N1	Q7L5N1 CSN6_HUMAN COP9 signalosome complex subunit 6 OS=Homo sapiens OX=9606 GN=COPS6 PE=1 SV=1	COPS6	327	CSN6_HUMAN		1	0.999	12	9
Q00796	Q00796 DHSO_HUMAN Sorbitol dehydrogenase OS=Homo sapiens OX=9606 GN=SORD PE=1 SV=4	SORD	357	DHSO_HUMAN		1	0.999	8	9
Q9UGP8	Q9UGP8 SEC63_HUMAN Translocation protein SEC63 homolog OS=Homo sapiens OX=9606 GN=SEC63 PE=1 SV=2	SEC63	760	SEC63_HUMAN		1	0.999	13	8
P48556	P48556 PSMD8_HUMAN 26S proteasome non-ATPase regulatory subunit 8 OS=Homo sapiens OX=9606 GN=PSMD8 PE=1 SV=2	PSMD8	350	PSMD8_HUMAN		1	0.999	7	8
Q9NP92	Q9NP92 RT30_HUMAN 39S ribosomal protein S30, mitochondrial OS=Homo sapiens OX=9606 GN=MRPS30 PE=1 SV=2	MRPS30	439	RT30_HUMAN		1	0.999	6	8
P21912	P21912 SDHB_HUMAN Succinate dehydrogenase [ubiquinone] iron-sulfur subunit, mitochondrial OS=Homo sapiens OX=9606 GN=SDHB PE=1 SV=3	SDHB	280	SDHB_HUMAN		1	0.999	10	8
O00217	O00217 NDUS8_HUMAN NADH dehydrogenase [ubiquinone] iron-sulfur protein 8, mitochondrial OS=Homo sapiens OX=9606 GN=NDUFS8 PE=1 SV=1	NDUFS8	210	NDUS8_HUMAN		1	0.999	6	8
O75431	O75431 MTX2_HUMAN Metaxin-2 OS=Homo sapiens OX=9606 GN=MTX2 PE=1 SV=1	MTX2	263	MTX2_HUMAN	O75431-2	1	0.999	5	8
O43252	O43252 PAPS1_HUMAN Bifunctional 3'-phosphoadenosine 5'-phosphosulfate synthase 1 OS=Homo sapiens OX=9606 GN=PAPSS1 PE=1 SV=2	PAPSS1	624	PAPS1_HUMAN		1	0.999	13	7
P62942	P62942 FKB1A_HUMAN Peptidyl-prolyl cis-trans isomerase FKBP1A OS=Homo sapiens OX=9606 GN=FKBP1A PE=1 SV=2	FKBP1A	108	FKB1A_HUMAN		1	0.999	4	7
P56556	P56556 NDUA6_HUMAN NADH dehydrogenase [ubiquinone] 1 alpha subcomplex subunit 6 OS=Homo sapiens OX=9606 GN=NDUFA6 PE=1 SV=4	NDUFA6	128	NDUA6_HUMAN		1	0.999	3	7
P68133	P68133 ACTS_HUMAN Actin, alpha skeletal muscle OS=Homo sapiens OX=9606 GN=ACTA1 PE=1 SV=1	ACTA1	377	ACTS_HUMAN		1	0.999	35	6
Q9Y6A4	Q9Y6A4 CFA20_HUMAN Cilia- and flagella-associated protein 20 OS=Homo sapiens OX=9606 GN=CFAP20 PE=1 SV=1	CFAP20	193	CFA20_HUMAN		1	0.999	7	6
Q9Y3D9	Q9Y3D9 RT23_HUMAN 28S ribosomal protein S23, mitochondrial OS=Homo sapiens OX=9606 GN=MRPS23 PE=1 SV=2	MRPS23	190	RT23_HUMAN		1	0.999	6	6
P30536	P30536 TSPO_HUMAN Translocator protein OS=Homo sapiens OX=9606 GN=TSPO PE=1 SV=3	TSPO	169	TSPO_HUMAN		1	0.999	3	6
Q9Y5Y2	Q9Y5Y2 NUBP2_HUMAN Cytosolic Fe-S cluster assembly factor NUBP2 OS=Homo sapiens OX=9606 GN=NUBP2 PE=1 SV=1	NUBP2	271	NUBP2_HUMAN		1	0.999	5	6
Q96DI7	Q96DI7 SNR40_HUMAN U5 small nuclear ribonucleoprotein 40 kDa protein OS=Homo sapiens OX=9606 GN=SNRNP40 PE=1 SV=1	SNRNP40	357	SNR40_HUMAN		1	0.999	11	6
Q9BYN8	Q9BYN8 RT26_HUMAN 28S ribosomal protein S26, mitochondrial OS=Homo sapiens OX=9606 GN=MRPS26 PE=1 SV=1	MRPS26	205	RT26_HUMAN		1	0.999	5	5
Q9Y6B6	Q9Y6B6 SAR1B_HUMAN GTP-binding protein SAR1b OS=Homo sapiens OX=9606 GN=SAR1B PE=1 SV=1	SAR1B	198	SAR1B_HUMAN		1	0.999	9	5
Q9Y312	Q9Y312 AAR2_HUMAN Protein AAR2 homolog OS=Homo sapiens OX=9606 GN=AAR2 PE=1 SV=2	AAR2	384	AAR2_HUMAN		1	0.999	7	5
O43808	O43808 PM34_HUMAN Peroxisomal membrane protein PMP34 OS=Homo sapiens OX=9606 GN=SLC25A17 PE=1 SV=1	SLC25A17	307	PM34_HUMAN		1	0.999	6	5
O00303	O00303 EIF3F_HUMAN Eukaryotic translation initiation factor 3 subunit F OS=Homo sapiens OX=9606 GN=EIF3F PE=1 SV=1	EIF3F	357	EIF3F_HUMAN		1	0.999	11	4
P84085	P84085 ARF5_HUMAN ADP-ribosylation factor 5 OS=Homo sapiens OX=9606 GN=ARF5 PE=1 SV=2	ARF5	180	ARF5_HUMAN		1	0.999	11	4
Q16540	Q16540 RM23_HUMAN 39S ribosomal protein L23, mitochondrial OS=Homo sapiens OX=9606 GN=MRPL23 PE=1 SV=1	MRPL23	153	RM23_HUMAN		1	0.999	4	4
Q9BUQ8	Q9BUQ8 DDX23_HUMAN Probable ATP-dependent RNA helicase DDX23 OS=Homo sapiens OX=9606 GN=DDX23 PE=1 SV=3	DDX23	820	DDX23_HUMAN		1	0.999	11	4
P62330	P62330 ARF6_HUMAN ADP-ribosylation factor 6 OS=Homo sapiens OX=9606 GN=ARF6 PE=1 SV=2	ARF6	175	ARF6_HUMAN		1	0.999	5	3
Q9Y2S7	Q9Y2S7 PDIP2_HUMAN Polymerase delta-interacting protein 2 OS=Homo sapiens OX=9606 GN=POLDIP2 PE=1 SV=1	POLDIP2	368	PDIP2_HUMAN		1	0.999	8	3
Q9BRJ2	Q9BRJ2 RM45_HUMAN 39S ribosomal protein L45, mitochondrial OS=Homo sapiens OX=9606 GN=MRPL45 PE=1 SV=2	MRPL45	306	RM45_HUMAN		1	0.999	6	2
P35237	P35237 SPB6_HUMAN Serpin B6 OS=Homo sapiens OX=9606 GN=SERPINB6 PE=1 SV=3	SERPINB6	376	SPB6_HUMAN		1	0.999	10	2
P01040	P01040 CYTA_HUMAN Cystatin-A OS=Homo sapiens OX=9606 GN=CSTA PE=1 SV=1	CSTA	98	CYTA_HUMAN		1	0.999	10	1
O43719	O43719 HTSF1_HUMAN HIV Tat-specific factor 1 OS=Homo sapiens OX=9606 GN=HTATSF1 PE=1 SV=1	HTATSF1	755	HTSF1_HUMAN		1	0.999	9	1
O95602	O95602 RPA1_HUMAN DNA-directed RNA polymerase I subunit RPA1 OS=Homo sapiens OX=9606 GN=POLR1A PE=1 SV=2	POLR1A	1720	RPA1_HUMAN		1	0.999	14	1
Q96A35	Q96A35 RM24_HUMAN 39S ribosomal protein L24, mitochondrial OS=Homo sapiens OX=9606 GN=MRPL24 PE=1 SV=1	MRPL24	216	RM24_HUMAN		1	0.999	5	1
P46783	P46783 RS10_HUMAN 40S ribosomal protein S10 OS=Homo sapiens OX=9606 GN=RPS10 PE=1 SV=1	RPS10	165	RS10_HUMAN		1	0.999	9	28
P52907	P52907 CAZA1_HUMAN F-actin-capping protein subunit alpha-1 OS=Homo sapiens OX=9606 GN=CAPZA1 PE=1 SV=3	CAPZA1	286	CAZA1_HUMAN		1	0.999	12	26
P46060	P46060 RAGP1_HUMAN Ran GTPase-activating protein 1 OS=Homo sapiens OX=9606 GN=RANGAP1 PE=1 SV=1	RANGAP1	587	RAGP1_HUMAN		1	0.999	19	22
P09972	P09972 ALDOC_HUMAN Fructose-bisphosphate aldolase C OS=Homo sapiens OX=9606 GN=ALDOC PE=1 SV=2	ALDOC	364	ALDOC_HUMAN		1	0.999	22	21
P60866	P60866 RS20_HUMAN 40S ribosomal protein S20 OS=Homo sapiens OX=9606 GN=RPS20 PE=1 SV=1	RPS20	119	RS20_HUMAN	P60866-2	1	0.999	7	17
P47985	P47985 UCRI_HUMAN Cytochrome b-c1 complex subunit Rieske, mitochondrial OS=Homo sapiens OX=9606 GN=UQCRFS1 PE=1 SV=2	UQCRFS1	274	UCRI_HUMAN		1	0.999	10	15
Q9NQC3-2	Q9NQC3-2 RTN4_HUMAN Isoform B of Reticulon-4 OS=Homo sapiens OX=9606 GN=RTN4	RTN4	373	RTN4_HUMAN		0.9999	0.999	7	14
Q96TA2	Q96TA2 YMEL1_HUMAN ATP-dependent zinc metalloprotease YME1L1 OS=Homo sapiens OX=9606 GN=YME1L1 PE=1 SV=2	YME1L1	773	YMEL1_HUMAN	Q96TA2-2, Q96TA2-3	1	0.999	12	14
P69849	P69849 NOMO3_HUMAN Nodal modulator 3 OS=Homo sapiens OX=9606 GN=NOMO3 PE=3 SV=2	NOMO3	1222	NOMO3_HUMAN	Q15155, Q5JPE7, Q5JPE7-2, Q5JPE7-3	1	0.999	21	12
P61758	P61758 PFD3_HUMAN Prefoldin subunit 3 OS=Homo sapiens OX=9606 GN=VBP1 PE=1 SV=4	VBP1	197	PFD3_HUMAN		1	0.999	7	12
Q9H936	Q9H936 GHC1_HUMAN Mitochondrial glutamate carrier 1 OS=Homo sapiens OX=9606 GN=SLC25A22 PE=1 SV=1	SLC25A22	323	GHC1_HUMAN		1	0.999	10	11
Q9UBS4	Q9UBS4 DJB11_HUMAN DnaJ homolog subfamily B member 11 OS=Homo sapiens OX=9606 GN=DNAJB11 PE=1 SV=1	DNAJB11	358	DJB11_HUMAN		1	0.999	12	11
Q9NRX4	Q9NRX4 PHP14_HUMAN 14 kDa phosphohistidine phosphatase OS=Homo sapiens OX=9606 GN=PHPT1 PE=1 SV=1	PHPT1	125	PHP14_HUMAN		1	0.999	5	11
O95470	O95470 SGPL1_HUMAN Sphingosine-1-phosphate lyase 1 OS=Homo sapiens OX=9606 GN=SGPL1 PE=1 SV=3	SGPL1	568	SGPL1_HUMAN		1	0.999	9	10
P43034	P43034 LIS1_HUMAN Platelet-activating factor acetylhydrolase IB subunit alpha OS=Homo sapiens OX=9606 GN=PAFAH1B1 PE=1 SV=2	PAFAH1B1	410	LIS1_HUMAN		1	0.999	9	10
P61026	P61026 RAB10_HUMAN Ras-related protein Rab-10 OS=Homo sapiens OX=9606 GN=RAB10 PE=1 SV=1	RAB10	200	RAB10_HUMAN		1	0.999	13	9
O15145	O15145 ARPC3_HUMAN Actin-related protein 2/3 complex subunit 3 OS=Homo sapiens OX=9606 GN=ARPC3 PE=1 SV=3	ARPC3	178	ARPC3_HUMAN		1	0.999	7	9
P99999	P99999 CYC_HUMAN Cytochrome c OS=Homo sapiens OX=9606 GN=CYCS PE=1 SV=2	CYCS	105	CYC_HUMAN		1	0.999	7	8
Q06203	Q06203 PUR1_HUMAN Amidophosphoribosyltransferase OS=Homo sapiens OX=9606 GN=PPAT PE=1 SV=1	PPAT	517	PUR1_HUMAN		1	0.999	12	8
Q96D46	Q96D46 NMD3_HUMAN 60S ribosomal export protein NMD3 OS=Homo sapiens OX=9606 GN=NMD3 PE=1 SV=1	NMD3	503	NMD3_HUMAN		1	0.999	7	8
Q99943	Q99943 PLCA_HUMAN 1-acyl-sn-glycerol-3-phosphate acyltransferase alpha OS=Homo sapiens OX=9606 GN=AGPAT1 PE=1 SV=2	AGPAT1	283	PLCA_HUMAN		1	0.999	4	8
P61964	P61964 WDR5_HUMAN WD repeat-containing protein 5 OS=Homo sapiens OX=9606 GN=WDR5 PE=1 SV=1	WDR5	334	WDR5_HUMAN		1	0.999	8	8
Q9NR45	Q9NR45 SIAS_HUMAN Sialic acid synthase OS=Homo sapiens OX=9606 GN=NANS PE=1 SV=2	NANS	359	SIAS_HUMAN		1	0.999	5	8
Q8WWY3	Q8WWY3 PRP31_HUMAN U4/U6 small nuclear ribonucleoprotein Prp31 OS=Homo sapiens OX=9606 GN=PRPF31 PE=1 SV=2	PRPF31	499	PRP31_HUMAN	Q8WWY3-2, Q8WWY3-4	1	0.999	8	8
Q13242	Q13242 SRSF9_HUMAN Serine/arginine-rich splicing factor 9 OS=Homo sapiens OX=9606 GN=SRSF9 PE=1 SV=1	SRSF9	221	SRSF9_HUMAN		1	0.999	12	7
P02794	P02794 FRIH_HUMAN Ferritin heavy chain OS=Homo sapiens OX=9606 GN=FTH1 PE=1 SV=2	FTH1	183	FRIH_HUMAN		1	0.999	6	7
Q96FN4	Q96FN4 CPNE2_HUMAN Copine-2 OS=Homo sapiens OX=9606 GN=CPNE2 PE=1 SV=3	CPNE2	548	CPNE2_HUMAN		1	0.999	9	7
P49770	P49770 EI2BB_HUMAN Translation initiation factor eIF-2B subunit beta OS=Homo sapiens OX=9606 GN=EIF2B2 PE=1 SV=3	EIF2B2	351	EI2BB_HUMAN		1	0.999	7	6
P52789	P52789 HXK2_HUMAN Hexokinase-2 OS=Homo sapiens OX=9606 GN=HK2 PE=1 SV=2	HK2	917	HXK2_HUMAN		1	0.999	20	6
Q13642-1	Q13642-1 FHL1_HUMAN Isoform 1 of Four and a half LIM domains protein 1 OS=Homo sapiens OX=9606 GN=FHL1	FHL1	280	FHL1_HUMAN	Q13642-4, Q13642-5	1	0.999	9	6
Q9NX20	Q9NX20 RM16_HUMAN 39S ribosomal protein L16, mitochondrial OS=Homo sapiens OX=9606 GN=MRPL16 PE=1 SV=1	MRPL16	251	RM16_HUMAN		1	0.999	4	6
Q9NRX1	Q9NRX1 PNO1_HUMAN RNA-binding protein PNO1 OS=Homo sapiens OX=9606 GN=PNO1 PE=1 SV=1	PNO1	252	PNO1_HUMAN		1	0.999	6	5
Q9BYD2	Q9BYD2 RM09_HUMAN 39S ribosomal protein L9, mitochondrial OS=Homo sapiens OX=9606 GN=MRPL9 PE=1 SV=2	MRPL9	267	RM09_HUMAN		1	0.999	9	5
Q9H7Z7	Q9H7Z7 PGES2_HUMAN Prostaglandin E synthase 2 OS=Homo sapiens OX=9606 GN=PTGES2 PE=1 SV=1	PTGES2	377	PGES2_HUMAN		1	0.999	8	5
Q8NFH4	Q8NFH4 NUP37_HUMAN Nucleoporin Nup37 OS=Homo sapiens OX=9606 GN=NUP37 PE=1 SV=1	NUP37	326	NUP37_HUMAN		1	0.999	5	5
P46821	P46821 MAP1B_HUMAN Microtubule-associated protein 1B OS=Homo sapiens OX=9606 GN=MAP1B PE=1 SV=2	MAP1B	2468	MAP1B_HUMAN		1	0.999	35	4
P16403	P16403 H12_HUMAN Histone H1.2 OS=Homo sapiens OX=9606 GN=HIST1H1C PE=1 SV=2	HIST1H1C	213	H12_HUMAN		1	0.999	16	4
Q15363	Q15363 TMED2_HUMAN Transmembrane emp24 domain-containing protein 2 OS=Homo sapiens OX=9606 GN=TMED2 PE=1 SV=1	TMED2	201	TMED2_HUMAN		1	0.999	5	4
Q9BVK6	Q9BVK6 TMED9_HUMAN Transmembrane emp24 domain-containing protein 9 OS=Homo sapiens OX=9606 GN=TMED9 PE=1 SV=2	TMED9	235	TMED9_HUMAN		1	0.999	8	4
P49642	P49642 PRI1_HUMAN DNA primase small subunit OS=Homo sapiens OX=9606 GN=PRIM1 PE=1 SV=1	PRIM1	420	PRI1_HUMAN		1	0.999	6	4
Q6UB35	Q6UB35 C1TM_HUMAN Monofunctional C1-tetrahydrofolate synthase, mitochondrial OS=Homo sapiens OX=9606 GN=MTHFD1L PE=1 SV=1	MTHFD1L	978	C1TM_HUMAN		1	0.999	11	4
Q96EK6	Q96EK6 GNA1_HUMAN Glucosamine 6-phosphate N-acetyltransferase OS=Homo sapiens OX=9606 GN=GNPNAT1 PE=1 SV=1	GNPNAT1	184	GNA1_HUMAN		1	0.999	5	4
Q9BUT1	Q9BUT1 BDH2_HUMAN 3-hydroxybutyrate dehydrogenase type 2 OS=Homo sapiens OX=9606 GN=BDH2 PE=1 SV=2	BDH2	245	BDH2_HUMAN		1	0.999	3	4
P12273	P12273 PIP_HUMAN Prolactin-inducible protein OS=Homo sapiens OX=9606 GN=PIP PE=1 SV=1	PIP	146	PIP_HUMAN		1	0.999	8	3
P63279	P63279 UBC9_HUMAN SUMO-conjugating enzyme UBC9 OS=Homo sapiens OX=9606 GN=UBE2I PE=1 SV=1	UBE2I	158	UBC9_HUMAN		1	0.999	7	3
Q92979	Q92979 NEP1_HUMAN Ribosomal RNA small subunit methyltransferase NEP1 OS=Homo sapiens OX=9606 GN=EMG1 PE=1 SV=4	EMG1	244	NEP1_HUMAN		1	0.999	6	3
Q8TC07-2	Q8TC07-2 TBC15_HUMAN Isoform 2 of TBC1 domain family member 15 OS=Homo sapiens OX=9606 GN=TBC1D15	TBC1D15	674	TBC15_HUMAN	Q8TC07-3	1	0.999	8	3
Q8WWC4	Q8WWC4 MAIP1_HUMAN m-AAA protease-interacting protein 1, mitochondrial OS=Homo sapiens OX=9606 GN=MAIP1 PE=1 SV=1	MAIP1	291	MAIP1_HUMAN		1	0.999	4	3
Q9BX68	Q9BX68 HINT2_HUMAN Histidine triad nucleotide-binding protein 2, mitochondrial OS=Homo sapiens OX=9606 GN=HINT2 PE=1 SV=1	HINT2	163	HINT2_HUMAN		1	0.999	3	3
P68871	P68871 HBB_HUMAN Hemoglobin subunit beta OS=Homo sapiens OX=9606 GN=HBB PE=1 SV=2	HBB	147	HBB_HUMAN		1	0.999	11	2
P34096	P34096 RNAS4_HUMAN Ribonuclease 4 OS=Homo sapiens OX=9606 GN=RNASE4 PE=1 SV=3	RNASE4	147	RNAS4_HUMAN		1	0.999	3	2
Q9BV38	Q9BV38 WDR18_HUMAN WD repeat-containing protein 18 OS=Homo sapiens OX=9606 GN=WDR18 PE=1 SV=2	WDR18	432	WDR18_HUMAN		1	0.999	9	2
P41240	P41240 CSK_HUMAN Tyrosine-protein kinase CSK OS=Homo sapiens OX=9606 GN=CSK PE=1 SV=1	CSK	450	CSK_HUMAN		1	0.999	8	2
Q2TAL8	Q2TAL8 QRIC1_HUMAN Glutamine-rich protein 1 OS=Homo sapiens OX=9606 GN=QRICH1 PE=1 SV=1	QRICH1	776	QRIC1_HUMAN		1	0.999	6	2
Q9HCN8	Q9HCN8 SDF2L_HUMAN Stromal cell-derived factor 2-like protein 1 OS=Homo sapiens OX=9606 GN=SDF2L1 PE=1 SV=2	SDF2L1	221	SDF2L_HUMAN		1	0.999	6	2
Q15061	Q15061 WDR43_HUMAN WD repeat-containing protein 43 OS=Homo sapiens OX=9606 GN=WDR43 PE=1 SV=3	WDR43	677	WDR43_HUMAN		1	0.999	8	2
Q8WVM8	Q8WVM8 SCFD1_HUMAN Sec1 family domain-containing protein 1 OS=Homo sapiens OX=9606 GN=SCFD1 PE=1 SV=4	SCFD1	642	SCFD1_HUMAN		1	0.999	10	2
Q96GC5-3	Q96GC5-3 RM48_HUMAN Isoform 2 of 39S ribosomal protein L48, mitochondrial OS=Homo sapiens OX=9606 GN=MRPL48	MRPL48	194	RM48_HUMAN		1	0.999	5	2
Q9NZ45	Q9NZ45 CISD1_HUMAN CDGSH iron-sulfur domain-containing protein 1 OS=Homo sapiens OX=9606 GN=CISD1 PE=1 SV=1	CISD1	108	CISD1_HUMAN		1	0.999	4	2
Q96TA1	Q96TA1 NIBL1_HUMAN Niban-like protein 1 OS=Homo sapiens OX=9606 GN=FAM129B PE=1 SV=3	FAM129B	746	NIBL1_HUMAN	Q96TA1-2	1	0.999	6	2
O75794	O75794 CD123_HUMAN Cell division cycle protein 123 homolog OS=Homo sapiens OX=9606 GN=CDC123 PE=1 SV=1	CDC123	336	CD123_HUMAN		1	0.999	5	2
Q96IJ6	Q96IJ6 GMPPA_HUMAN Mannose-1-phosphate guanyltransferase alpha OS=Homo sapiens OX=9606 GN=GMPPA PE=1 SV=1	GMPPA	420	GMPPA_HUMAN	Q96IJ6-2	1	0.999	5	2
Q9BT73	Q9BT73 PSMG3_HUMAN Proteasome assembly chaperone 3 OS=Homo sapiens OX=9606 GN=PSMG3 PE=1 SV=1	PSMG3	122	PSMG3_HUMAN		1	0.999	3	2
O43913	O43913 ORC5_HUMAN Origin recognition complex subunit 5 OS=Homo sapiens OX=9606 GN=ORC5 PE=1 SV=1	ORC5	435	ORC5_HUMAN		1	0.999	4	2
P01876	P01876 IGHA1_HUMAN Immunoglobulin heavy constant alpha 1 OS=Homo sapiens OX=9606 GN=IGHA1 PE=1 SV=2	IGHA1	353	IGHA1_HUMAN		1	0.999	9	1
Q9BYD1	Q9BYD1 RM13_HUMAN 39S ribosomal protein L13, mitochondrial OS=Homo sapiens OX=9606 GN=MRPL13 PE=1 SV=1	MRPL13	178	RM13_HUMAN		1	0.999	9	1
Q9NY61	Q9NY61 AATF_HUMAN Protein AATF OS=Homo sapiens OX=9606 GN=AATF PE=1 SV=1	AATF	560	AATF_HUMAN		1	0.999	14	1
Q9NRW3	Q9NRW3 ABC3C_HUMAN DNA dC->dU-editing enzyme APOBEC-3C OS=Homo sapiens OX=9606 GN=APOBEC3C PE=1 SV=2	APOBEC3C	190	ABC3C_HUMAN		1	0.999	5	1
Q8WVE0	Q8WVE0 EFMT1_HUMAN EEF1A lysine methyltransferase 1 OS=Homo sapiens OX=9606 GN=EEF1AKMT1 PE=1 SV=1	EEF1AKMT1	214	EFMT1_HUMAN		0.9997	0.9986	2	1
Q13416	Q13416 ORC2_HUMAN Origin recognition complex subunit 2 OS=Homo sapiens OX=9606 GN=ORC2 PE=1 SV=2	ORC2	577	ORC2_HUMAN		1	0.999	5	1
O95571	O95571 ETHE1_HUMAN Persulfide dioxygenase ETHE1, mitochondrial OS=Homo sapiens OX=9606 GN=ETHE1 PE=1 SV=2	ETHE1	254	ETHE1_HUMAN		1	0.999	5	1
Q9Y697	Q9Y697 NFS1_HUMAN Cysteine desulfurase, mitochondrial OS=Homo sapiens OX=9606 GN=NFS1 PE=1 SV=3	NFS1	457	NFS1_HUMAN	Q9Y697-2	1	0.999	4	1
P28072	P28072 PSB6_HUMAN Proteasome subunit beta type-6 OS=Homo sapiens OX=9606 GN=PSMB6 PE=1 SV=4	PSMB6	239	PSB6_HUMAN		1	0.999	6	27
Q9Y224	Q9Y224 RTRAF_HUMAN RNA transcription, translation and transport factor protein OS=Homo sapiens OX=9606 GN=RTRAF PE=1 SV=1	RTRAF	244	RTRAF_HUMAN		1	0.999	14	25
O94826	O94826 TOM70_HUMAN Mitochondrial import receptor subunit TOM70 OS=Homo sapiens OX=9606 GN=TOMM70 PE=1 SV=1	TOMM70	608	TOM70_HUMAN		1	0.999	18	21
P10768	P10768 ESTD_HUMAN S-formylglutathione hydrolase OS=Homo sapiens OX=9606 GN=ESD PE=1 SV=2	ESD	282	ESTD_HUMAN		1	0.999	14	19
O60884	O60884 DNJA2_HUMAN DnaJ homolog subfamily A member 2 OS=Homo sapiens OX=9606 GN=DNAJA2 PE=1 SV=1	DNAJA2	412	DNJA2_HUMAN		1	0.999	15	19
P31150	P31150 GDIA_HUMAN Rab GDP dissociation inhibitor alpha OS=Homo sapiens OX=9606 GN=GDI1 PE=1 SV=2	GDI1	447	GDIA_HUMAN		1	0.999	26	19
Q96DH6-2	Q96DH6-2 MSI2H_HUMAN Isoform 2 of RNA-binding protein Musashi homolog 2 OS=Homo sapiens OX=9606 GN=MSI2	MSI2	251	MSI2H_HUMAN		1	0.999	9	17
P08134	P08134 RHOC_HUMAN Rho-related GTP-binding protein RhoC OS=Homo sapiens OX=9606 GN=RHOC PE=1 SV=1	RHOC	193	RHOC_HUMAN		1	0.999	11	14
Q9UJ70	Q9UJ70 NAGK_HUMAN N-acetyl-D-glucosamine kinase OS=Homo sapiens OX=9606 GN=NAGK PE=1 SV=4	NAGK	344	NAGK_HUMAN	Q9UJ70-2	1	0.999	10	14
Q96HE7	Q96HE7 ERO1A_HUMAN ERO1-like protein alpha OS=Homo sapiens OX=9606 GN=ERO1A PE=1 SV=2	ERO1A	468	ERO1A_HUMAN		1	0.999	12	13
O15258	O15258 RER1_HUMAN Protein RER1 OS=Homo sapiens OX=9606 GN=RER1 PE=1 SV=1	RER1	196	RER1_HUMAN		1	0.999	6	13
P51665	P51665 PSMD7_HUMAN 26S proteasome non-ATPase regulatory subunit 7 OS=Homo sapiens OX=9606 GN=PSMD7 PE=1 SV=2	PSMD7	324	PSMD7_HUMAN		1	0.999	10	12
Q52LJ0-2	Q52LJ0-2 FA98B_HUMAN Isoform 2 of Protein FAM98B OS=Homo sapiens OX=9606 GN=FAM98B	FAM98B	433	FA98B_HUMAN		1	0.999	9	12
Q9NS69	Q9NS69 TOM22_HUMAN Mitochondrial import receptor subunit TOM22 homolog OS=Homo sapiens OX=9606 GN=TOMM22 PE=1 SV=3	TOMM22	142	TOM22_HUMAN		1	0.999	5	11
Q8TCJ2	Q8TCJ2 STT3B_HUMAN Dolichyl-diphosphooligosaccharide--protein glycosyltransferase subunit STT3B OS=Homo sapiens OX=9606 GN=STT3B PE=1 SV=1	STT3B	826	STT3B_HUMAN		1	0.999	9	11
Q12907	Q12907 LMAN2_HUMAN Vesicular integral-membrane protein VIP36 OS=Homo sapiens OX=9606 GN=LMAN2 PE=1 SV=1	LMAN2	356	LMAN2_HUMAN		1	0.999	12	10
P82933	P82933 RT09_HUMAN 28S ribosomal protein S9, mitochondrial OS=Homo sapiens OX=9606 GN=MRPS9 PE=1 SV=2	MRPS9	396	RT09_HUMAN		1	0.999	14	10
Q13616	Q13616 CUL1_HUMAN Cullin-1 OS=Homo sapiens OX=9606 GN=CUL1 PE=1 SV=2	CUL1	776	CUL1_HUMAN		1	0.999	14	10
O75340	O75340 PDCD6_HUMAN Programmed cell death protein 6 OS=Homo sapiens OX=9606 GN=PDCD6 PE=1 SV=1	PDCD6	191	PDCD6_HUMAN	O75340-2	1	0.999	5	10
Q14165	Q14165 MLEC_HUMAN Malectin OS=Homo sapiens OX=9606 GN=MLEC PE=1 SV=1	MLEC	292	MLEC_HUMAN		1	0.999	11	9
P29317	P29317 EPHA2_HUMAN Ephrin type-A receptor 2 OS=Homo sapiens OX=9606 GN=EPHA2 PE=1 SV=2	EPHA2	976	EPHA2_HUMAN		1	0.999	18	9
Q9Y3B4	Q9Y3B4 SF3B6_HUMAN Splicing factor 3B subunit 6 OS=Homo sapiens OX=9606 GN=SF3B6 PE=1 SV=1	SF3B6	125	SF3B6_HUMAN		1	0.999	6	9
Q7L8L6	Q7L8L6 FAKD5_HUMAN FAST kinase domain-containing protein 5, mitochondrial OS=Homo sapiens OX=9606 GN=FASTKD5 PE=1 SV=1	FASTKD5	764	FAKD5_HUMAN		1	0.999	10	9
Q9NQG5	Q9NQG5 RPR1B_HUMAN Regulation of nuclear pre-mRNA domain-containing protein 1B OS=Homo sapiens OX=9606 GN=RPRD1B PE=1 SV=1	RPRD1B	326	RPR1B_HUMAN		1	0.999	11	8
Q9UKK9	Q9UKK9 NUDT5_HUMAN ADP-sugar pyrophosphatase OS=Homo sapiens OX=9606 GN=NUDT5 PE=1 SV=1	NUDT5	219	NUDT5_HUMAN		1	0.999	8	8
P21399	P21399 ACOC_HUMAN Cytoplasmic aconitate hydratase OS=Homo sapiens OX=9606 GN=ACO1 PE=1 SV=3	ACO1	889	ACOC_HUMAN		1	0.999	13	7
P02792	P02792 FRIL_HUMAN Ferritin light chain OS=Homo sapiens OX=9606 GN=FTL PE=1 SV=2	FTL	175	FRIL_HUMAN		1	0.999	7	7
Q96S52	Q96S52 PIGS_HUMAN GPI transamidase component PIG-S OS=Homo sapiens OX=9606 GN=PIGS PE=1 SV=3	PIGS	555	PIGS_HUMAN		1	0.999	8	7
Q9H1E5	Q9H1E5 TMX4_HUMAN Thioredoxin-related transmembrane protein 4 OS=Homo sapiens OX=9606 GN=TMX4 PE=1 SV=1	TMX4	349	TMX4_HUMAN		1	0.999	4	7
P16401	P16401 H15_HUMAN Histone H1.5 OS=Homo sapiens OX=9606 GN=HIST1H1B PE=1 SV=3	HIST1H1B	226	H15_HUMAN		1	0.999	18	6
Q70UQ0-4	Q70UQ0-4 IKIP_HUMAN Isoform 4 of Inhibitor of nuclear factor kappa-B kinase-interacting protein OS=Homo sapiens OX=9606 GN=IKBIP	IKBIP	377	IKIP_HUMAN		1	0.999	11	6
P42025	P42025 ACTY_HUMAN Beta-centractin OS=Homo sapiens OX=9606 GN=ACTR1B PE=1 SV=1	ACTR1B	376	ACTY_HUMAN		1	0.999	14	6
P55769	P55769 NH2L1_HUMAN NHP2-like protein 1 OS=Homo sapiens OX=9606 GN=SNU13 PE=1 SV=3	SNU13	128	NH2L1_HUMAN		1	0.999	5	6
P11233	P11233 RALA_HUMAN Ras-related protein Ral-A OS=Homo sapiens OX=9606 GN=RALA PE=1 SV=1	RALA	206	RALA_HUMAN		1	0.999	6	5
P49005	P49005 DPOD2_HUMAN DNA polymerase delta subunit 2 OS=Homo sapiens OX=9606 GN=POLD2 PE=1 SV=1	POLD2	469	DPOD2_HUMAN		1	0.999	10	5
O43488	O43488 ARK72_HUMAN Aflatoxin B1 aldehyde reductase member 2 OS=Homo sapiens OX=9606 GN=AKR7A2 PE=1 SV=3	AKR7A2	359	ARK72_HUMAN		1	0.999	8	5
P00374	P00374 DYR_HUMAN Dihydrofolate reductase OS=Homo sapiens OX=9606 GN=DHFR PE=1 SV=2	DHFR	187	DYR_HUMAN		1	0.999	7	5
Q9ULA0	Q9ULA0 DNPEP_HUMAN Aspartyl aminopeptidase OS=Homo sapiens OX=9606 GN=DNPEP PE=1 SV=1	DNPEP	475	DNPEP_HUMAN		1	0.999	10	5
Q9HAV0	Q9HAV0 GBB4_HUMAN Guanine nucleotide-binding protein subunit beta-4 OS=Homo sapiens OX=9606 GN=GNB4 PE=1 SV=3	GNB4	340	GBB4_HUMAN		1	0.999	7	5
P07477	P07477 TRY1_HUMAN Trypsin-1 OS=Homo sapiens OX=9606 GN=PRSS1 PE=1 SV=1	PRSS1	247	TRY1_HUMAN		1	0.999	4	4
Q9HCS7	Q9HCS7 SYF1_HUMAN Pre-mRNA-splicing factor SYF1 OS=Homo sapiens OX=9606 GN=XAB2 PE=1 SV=2	XAB2	855	SYF1_HUMAN		1	0.999	18	4
P35442	P35442 TSP2_HUMAN Thrombospondin-2 OS=Homo sapiens OX=9606 GN=THBS2 PE=1 SV=2	THBS2	1172	TSP2_HUMAN		1	0.999	2	4
O95747	O95747 OXSR1_HUMAN Serine/threonine-protein kinase OSR1 OS=Homo sapiens OX=9606 GN=OXSR1 PE=1 SV=1	OXSR1	527	OXSR1_HUMAN		1	0.999	8	4
P63172	P63172 DYLT1_HUMAN Dynein light chain Tctex-type 1 OS=Homo sapiens OX=9606 GN=DYNLT1 PE=1 SV=1	DYNLT1	113	DYLT1_HUMAN		1	0.999	4	4
Q9H2W6	Q9H2W6 RM46_HUMAN 39S ribosomal protein L46, mitochondrial OS=Homo sapiens OX=9606 GN=MRPL46 PE=1 SV=1	MRPL46	279	RM46_HUMAN		1	0.999	8	4
Q9UHQ9	Q9UHQ9 NB5R1_HUMAN NADH-cytochrome b5 reductase 1 OS=Homo sapiens OX=9606 GN=CYB5R1 PE=1 SV=1	CYB5R1	305	NB5R1_HUMAN		1	0.999	9	4
Q99567	Q99567 NUP88_HUMAN Nuclear pore complex protein Nup88 OS=Homo sapiens OX=9606 GN=NUP88 PE=1 SV=2	NUP88	741	NUP88_HUMAN		1	0.999	5	4
P55039	P55039 DRG2_HUMAN Developmentally-regulated GTP-binding protein 2 OS=Homo sapiens OX=9606 GN=DRG2 PE=1 SV=1	DRG2	364	DRG2_HUMAN		1	0.999	7	4
P61962	P61962 DCAF7_HUMAN DDB1- and CUL4-associated factor 7 OS=Homo sapiens OX=9606 GN=DCAF7 PE=1 SV=1	DCAF7	342	DCAF7_HUMAN		1	0.999	7	4
Q9Y399	Q9Y399 RT02_HUMAN 28S ribosomal protein S2, mitochondrial OS=Homo sapiens OX=9606 GN=MRPS2 PE=1 SV=1	MRPS2	296	RT02_HUMAN		1	0.999	6	4
Q9H553	Q9H553 ALG2_HUMAN Alpha-1,3/1,6-mannosyltransferase ALG2 OS=Homo sapiens OX=9606 GN=ALG2 PE=1 SV=1	ALG2	416	ALG2_HUMAN		1	0.999	6	4
Q96CX6	Q96CX6 LRC58_HUMAN Leucine-rich repeat-containing protein 58 OS=Homo sapiens OX=9606 GN=LRRC58 PE=1 SV=2	LRRC58	371	LRC58_HUMAN		1	0.999	4	4
Q86XI2	Q86XI2 CNDG2_HUMAN Condensin-2 complex subunit G2 OS=Homo sapiens OX=9606 GN=NCAPG2 PE=1 SV=1	NCAPG2	1143	CNDG2_HUMAN	Q86XI2-2	1	0.999	7	4
O15347	O15347 HMGB3_HUMAN High mobility group protein B3 OS=Homo sapiens OX=9606 GN=HMGB3 PE=1 SV=4	HMGB3	200	HMGB3_HUMAN		1	0.999	10	3
O75351	O75351 VPS4B_HUMAN Vacuolar protein sorting-associated protein 4B OS=Homo sapiens OX=9606 GN=VPS4B PE=1 SV=2	VPS4B	444	VPS4B_HUMAN		1	0.999	6	3
P62380	P62380 TBPL1_HUMAN TATA box-binding protein-like protein 1 OS=Homo sapiens OX=9606 GN=TBPL1 PE=1 SV=1	TBPL1	186	TBPL1_HUMAN		1	0.999	3	3
Q96FX7	Q96FX7 TRM61_HUMAN tRNA (adenine(58)-N(1))-methyltransferase catalytic subunit TRMT61A OS=Homo sapiens OX=9606 GN=TRMT61A PE=1 SV=1	TRMT61A	289	TRM61_HUMAN		1	0.999	6	3
P18074	P18074 ERCC2_HUMAN General transcription and DNA repair factor IIH helicase subunit XPD OS=Homo sapiens OX=9606 GN=ERCC2 PE=1 SV=1	ERCC2	760	ERCC2_HUMAN		1	0.999	7	3
P49247	P49247 RPIA_HUMAN Ribose-5-phosphate isomerase OS=Homo sapiens OX=9606 GN=RPIA PE=1 SV=3	RPIA	311	RPIA_HUMAN		1	0.999	4	3
O43156	O43156 TTI1_HUMAN TELO2-interacting protein 1 homolog OS=Homo sapiens OX=9606 GN=TTI1 PE=1 SV=3	TTI1	1089	TTI1_HUMAN		1	0.999	8	3
P20337	P20337 RAB3B_HUMAN Ras-related protein Rab-3B OS=Homo sapiens OX=9606 GN=RAB3B PE=1 SV=2	RAB3B	219	RAB3B_HUMAN		1	0.999	6	3
Q15125	Q15125 EBP_HUMAN 3-beta-hydroxysteroid-Delta(8),Delta(7)-isomerase OS=Homo sapiens OX=9606 GN=EBP PE=1 SV=3	EBP	230	EBP_HUMAN		1	0.999	3	3
P09001	P09001 RM03_HUMAN 39S ribosomal protein L3, mitochondrial OS=Homo sapiens OX=9606 GN=MRPL3 PE=1 SV=1	MRPL3	348	RM03_HUMAN		1	0.999	5	3
Q9BQ39	Q9BQ39 DDX50_HUMAN ATP-dependent RNA helicase DDX50 OS=Homo sapiens OX=9606 GN=DDX50 PE=1 SV=1	DDX50	737	DDX50_HUMAN		1	0.999	14	2
Q9H4G4	Q9H4G4 GAPR1_HUMAN Golgi-associated plant pathogenesis-related protein 1 OS=Homo sapiens OX=9606 GN=GLIPR2 PE=1 SV=3	GLIPR2	154	GAPR1_HUMAN		1	0.999	5	2
P07858	P07858 CATB_HUMAN Cathepsin B OS=Homo sapiens OX=9606 GN=CTSB PE=1 SV=3	CTSB	339	CATB_HUMAN		1	0.999	6	2
P82930	P82930 RT34_HUMAN 28S ribosomal protein S34, mitochondrial OS=Homo sapiens OX=9606 GN=MRPS34 PE=1 SV=2	MRPS34	218	RT34_HUMAN		1	0.999	6	2
Q9H2P0	Q9H2P0 ADNP_HUMAN Activity-dependent neuroprotector homeobox protein OS=Homo sapiens OX=9606 GN=ADNP PE=1 SV=1	ADNP	1102	ADNP_HUMAN		1	0.999	9	2
Q6P1X6	Q6P1X6 CH082_HUMAN UPF0598 protein C8orf82 OS=Homo sapiens OX=9606 GN=C8orf82 PE=1 SV=2	C8orf82	216	CH082_HUMAN		1	0.999	6	2
Q6IAN0	Q6IAN0 DRS7B_HUMAN Dehydrogenase/reductase SDR family member 7B OS=Homo sapiens OX=9606 GN=DHRS7B PE=1 SV=2	DHRS7B	325	DRS7B_HUMAN		1	0.999	6	2
Q96EY4	Q96EY4 TMA16_HUMAN Translation machinery-associated protein 16 OS=Homo sapiens OX=9606 GN=TMA16 PE=1 SV=2	TMA16	203	TMA16_HUMAN		1	0.999	2	2
Q9NRF8	Q9NRF8 PYRG2_HUMAN CTP synthase 2 OS=Homo sapiens OX=9606 GN=CTPS2 PE=1 SV=1	CTPS2	586	PYRG2_HUMAN		1	0.999	7	2
P04745	P04745 AMY1_HUMAN Alpha-amylase 1 OS=Homo sapiens OX=9606 GN=AMY1A PE=1 SV=2	AMY1A	511	AMY1_HUMAN		1	0.999	12	1
P27449	P27449 VATL_HUMAN V-type proton ATPase 16 kDa proteolipid subunit OS=Homo sapiens OX=9606 GN=ATP6V0C PE=1 SV=1	ATP6V0C	155	VATL_HUMAN		1	0.999	2	1
Q9BRX2	Q9BRX2 PELO_HUMAN Protein pelota homolog OS=Homo sapiens OX=9606 GN=PELO PE=1 SV=2	PELO	385	PELO_HUMAN		1	0.999	6	1
Q9UDY4	Q9UDY4 DNJB4_HUMAN DnaJ homolog subfamily B member 4 OS=Homo sapiens OX=9606 GN=DNAJB4 PE=1 SV=1	DNAJB4	337	DNJB4_HUMAN		1	0.999	3	1
O43159	O43159 RRP8_HUMAN Ribosomal RNA-processing protein 8 OS=Homo sapiens OX=9606 GN=RRP8 PE=1 SV=2	RRP8	456	RRP8_HUMAN		1	0.999	3	1
Q13084	Q13084 RM28_HUMAN 39S ribosomal protein L28, mitochondrial OS=Homo sapiens OX=9606 GN=MRPL28 PE=1 SV=4	MRPL28	256	RM28_HUMAN		1	0.999	9	1
Q92759	Q92759 TF2H4_HUMAN General transcription factor IIH subunit 4 OS=Homo sapiens OX=9606 GN=GTF2H4 PE=1 SV=1	GTF2H4	462	TF2H4_HUMAN		1	0.999	6	1
Q96IU4	Q96IU4 ABHEB_HUMAN Protein ABHD14B OS=Homo sapiens OX=9606 GN=ABHD14B PE=1 SV=1	ABHD14B	210	ABHEB_HUMAN		1	0.999	5	1
Q9NQT4	Q9NQT4 EXOS5_HUMAN Exosome complex component RRP46 OS=Homo sapiens OX=9606 GN=EXOSC5 PE=1 SV=1	EXOSC5	235	EXOS5_HUMAN		1	0.999	2	1
Q9Y5L4	Q9Y5L4 TIM13_HUMAN Mitochondrial import inner membrane translocase subunit Tim13 OS=Homo sapiens OX=9606 GN=TIMM13 PE=1 SV=1	TIMM13	95	TIM13_HUMAN		1	0.999	4	1
Q8IYB8	Q8IYB8 SUV3_HUMAN ATP-dependent RNA helicase SUPV3L1, mitochondrial OS=Homo sapiens OX=9606 GN=SUPV3L1 PE=1 SV=1	SUPV3L1	786	SUV3_HUMAN		1	0.999	5	1
Q9HBL7	Q9HBL7 PLRKT_HUMAN Plasminogen receptor (KT) OS=Homo sapiens OX=9606 GN=PLGRKT PE=1 SV=1	PLGRKT	147	PLRKT_HUMAN		1	0.999	3	1
Q9UL46	Q9UL46 PSME2_HUMAN Proteasome activator complex subunit 2 OS=Homo sapiens OX=9606 GN=PSME2 PE=1 SV=4	PSME2	239	PSME2_HUMAN		1	0.999	16	47
Q92945	Q92945 FUBP2_HUMAN Far upstream element-binding protein 2 OS=Homo sapiens OX=9606 GN=KHSRP PE=1 SV=4	KHSRP	711	FUBP2_HUMAN		1	0.999	21	30
P09104	P09104 ENOG_HUMAN Gamma-enolase OS=Homo sapiens OX=9606 GN=ENO2 PE=1 SV=3	ENO2	434	ENOG_HUMAN		1	0.999	20	29
Q15691	Q15691 MARE1_HUMAN Microtubule-associated protein RP/EB family member 1 OS=Homo sapiens OX=9606 GN=MAPRE1 PE=1 SV=3	MAPRE1	268	MARE1_HUMAN		1	0.999	14	26
Q9BPU6	Q9BPU6 DPYL5_HUMAN Dihydropyrimidinase-related protein 5 OS=Homo sapiens OX=9606 GN=DPYSL5 PE=1 SV=1	DPYSL5	564	DPYL5_HUMAN		1	0.999	17	25
P50402	P50402 EMD_HUMAN Emerin OS=Homo sapiens OX=9606 GN=EMD PE=1 SV=1	EMD	254	EMD_HUMAN		1	0.999	12	22
Q12874	Q12874 SF3A3_HUMAN Splicing factor 3A subunit 3 OS=Homo sapiens OX=9606 GN=SF3A3 PE=1 SV=1	SF3A3	501	SF3A3_HUMAN		1	0.999	14	19
O94776	O94776 MTA2_HUMAN Metastasis-associated protein MTA2 OS=Homo sapiens OX=9606 GN=MTA2 PE=1 SV=1	MTA2	668	MTA2_HUMAN		1	0.999	15	19
P24534	P24534 EF1B_HUMAN Elongation factor 1-beta OS=Homo sapiens OX=9606 GN=EEF1B2 PE=1 SV=3	EEF1B2	225	EF1B_HUMAN		1	0.999	7	18
P13693	P13693 TCTP_HUMAN Translationally-controlled tumor protein OS=Homo sapiens OX=9606 GN=TPT1 PE=1 SV=1	TPT1	172	TCTP_HUMAN		1	0.999	9	18
O75844	O75844 FACE1_HUMAN CAAX prenyl protease 1 homolog OS=Homo sapiens OX=9606 GN=ZMPSTE24 PE=1 SV=2	ZMPSTE24	475	FACE1_HUMAN		1	0.999	8	18
O75947	O75947 ATP5H_HUMAN ATP synthase subunit d, mitochondrial OS=Homo sapiens OX=9606 GN=ATP5PD PE=1 SV=3	ATP5PD	161	ATP5H_HUMAN		1	0.999	10	17
O00483	O00483 NDUA4_HUMAN Cytochrome c oxidase subunit NDUFA4 OS=Homo sapiens OX=9606 GN=NDUFA4 PE=1 SV=1	NDUFA4	81	NDUA4_HUMAN		1	0.999	4	16
P17612	P17612 KAPCA_HUMAN cAMP-dependent protein kinase catalytic subunit alpha OS=Homo sapiens OX=9606 GN=PRKACA PE=1 SV=2	PRKACA	351	KAPCA_HUMAN	P17612-2	1	0.999	14	15
O75396	O75396 SC22B_HUMAN Vesicle-trafficking protein SEC22b OS=Homo sapiens OX=9606 GN=SEC22B PE=1 SV=4	SEC22B	215	SC22B_HUMAN		1	0.999	8	14
P00813	P00813 ADA_HUMAN Adenosine deaminase OS=Homo sapiens OX=9606 GN=ADA PE=1 SV=3	ADA	363	ADA_HUMAN		1	0.999	14	14
P0DN79	P0DN79 CBSL_HUMAN Cystathionine beta-synthase-like protein OS=Homo sapiens OX=9606 GN=CBSL PE=1 SV=1	CBSL	551	CBSL_HUMAN	P35520, P35520-2	1	0.999	11	14
O43765	O43765 SGTA_HUMAN Small glutamine-rich tetratricopeptide repeat-containing protein alpha OS=Homo sapiens OX=9606 GN=SGTA PE=1 SV=1	SGTA	313	SGTA_HUMAN		1	0.999	6	12
P27144	P27144 KAD4_HUMAN Adenylate kinase 4, mitochondrial OS=Homo sapiens OX=9606 GN=AK4 PE=1 SV=1	AK4	223	KAD4_HUMAN		1	0.999	9	12
Q8IY67-2	Q8IY67-2 RAVR1_HUMAN Isoform 2 of Ribonucleoprotein PTB-binding 1 OS=Homo sapiens OX=9606 GN=RAVER1	RAVER1	739	RAVR1_HUMAN		1	0.999	7	12
Q9UL25	Q9UL25 RAB21_HUMAN Ras-related protein Rab-21 OS=Homo sapiens OX=9606 GN=RAB21 PE=1 SV=3	RAB21	225	RAB21_HUMAN		1	0.999	12	11
Q9HB07	Q9HB07 MYG1_HUMAN UPF0160 protein MYG1, mitochondrial OS=Homo sapiens OX=9606 GN=C12orf10 PE=1 SV=2	C12orf10	376	MYG1_HUMAN		1	0.999	7	11
Q13185	Q13185 CBX3_HUMAN Chromobox protein homolog 3 OS=Homo sapiens OX=9606 GN=CBX3 PE=1 SV=4	CBX3	183	CBX3_HUMAN		1	0.999	8	10
O15372	O15372 EIF3H_HUMAN Eukaryotic translation initiation factor 3 subunit H OS=Homo sapiens OX=9606 GN=EIF3H PE=1 SV=1	EIF3H	352	EIF3H_HUMAN		1	0.999	12	10
Q03518	Q03518 TAP1_HUMAN Antigen peptide transporter 1 OS=Homo sapiens OX=9606 GN=TAP1 PE=1 SV=2	TAP1	808	TAP1_HUMAN		1	0.999	9	10
Q9NQ88	Q9NQ88 TIGAR_HUMAN Fructose-2,6-bisphosphatase TIGAR OS=Homo sapiens OX=9606 GN=TIGAR PE=1 SV=1	TIGAR	270	TIGAR_HUMAN		1	0.999	9	10
P21953	P21953 ODBB_HUMAN 2-oxoisovalerate dehydrogenase subunit beta, mitochondrial OS=Homo sapiens OX=9606 GN=BCKDHB PE=1 SV=2	BCKDHB	392	ODBB_HUMAN		1	0.999	5	10
O75718	O75718 CRTAP_HUMAN Cartilage-associated protein OS=Homo sapiens OX=9606 GN=CRTAP PE=1 SV=1	CRTAP	401	CRTAP_HUMAN		1	0.999	10	9
P20042	P20042 IF2B_HUMAN Eukaryotic translation initiation factor 2 subunit 2 OS=Homo sapiens OX=9606 GN=EIF2S2 PE=1 SV=2	EIF2S2	333	IF2B_HUMAN		1	0.999	16	8
P30520	P30520 PURA2_HUMAN Adenylosuccinate synthetase isozyme 2 OS=Homo sapiens OX=9606 GN=ADSS PE=1 SV=3	ADSS	456	PURA2_HUMAN		1	0.999	14	8
P39210	P39210 MPV17_HUMAN Protein Mpv17 OS=Homo sapiens OX=9606 GN=MPV17 PE=1 SV=1	MPV17	176	MPV17_HUMAN		1	0.999	3	8
Q7Z4W1	Q7Z4W1 DCXR_HUMAN L-xylulose reductase OS=Homo sapiens OX=9606 GN=DCXR PE=1 SV=2	DCXR	244	DCXR_HUMAN		1	0.999	6	7
P35637	P35637 FUS_HUMAN RNA-binding protein FUS OS=Homo sapiens OX=9606 GN=FUS PE=1 SV=1	FUS	526	FUS_HUMAN	P35637-2	1	0.999	6	7
Q13144	Q13144 EI2BE_HUMAN Translation initiation factor eIF-2B subunit epsilon OS=Homo sapiens OX=9606 GN=EIF2B5 PE=1 SV=3	EIF2B5	721	EI2BE_HUMAN		1	0.999	7	7
P61326	P61326 MGN_HUMAN Protein mago nashi homolog OS=Homo sapiens OX=9606 GN=MAGOH PE=1 SV=1	MAGOH	146	MGN_HUMAN	Q96A72	1	0.999	9	6
P04632	P04632 CPNS1_HUMAN Calpain small subunit 1 OS=Homo sapiens OX=9606 GN=CAPNS1 PE=1 SV=1	CAPNS1	268	CPNS1_HUMAN		1	0.999	7	6
Q9H0U4	Q9H0U4 RAB1B_HUMAN Ras-related protein Rab-1B OS=Homo sapiens OX=9606 GN=RAB1B PE=1 SV=1	RAB1B	201	RAB1B_HUMAN		1	0.999	9	6
Q15785	Q15785 TOM34_HUMAN Mitochondrial import receptor subunit TOM34 OS=Homo sapiens OX=9606 GN=TOMM34 PE=1 SV=2	TOMM34	309	TOM34_HUMAN		1	0.999	10	6
O15270	O15270 SPTC2_HUMAN Serine palmitoyltransferase 2 OS=Homo sapiens OX=9606 GN=SPTLC2 PE=1 SV=1	SPTLC2	562	SPTC2_HUMAN		1	0.999	8	6
Q8WVX9	Q8WVX9 FACR1_HUMAN Fatty acyl-CoA reductase 1 OS=Homo sapiens OX=9606 GN=FAR1 PE=1 SV=1	FAR1	515	FACR1_HUMAN		1	0.999	7	6
Q9Y3B3	Q9Y3B3 TMED7_HUMAN Transmembrane emp24 domain-containing protein 7 OS=Homo sapiens OX=9606 GN=TMED7 PE=1 SV=2	TMED7	224	TMED7_HUMAN		1	0.999	5	6
Q16222	Q16222 UAP1_HUMAN UDP-N-acetylhexosamine pyrophosphorylase OS=Homo sapiens OX=9606 GN=UAP1 PE=1 SV=3	UAP1	522	UAP1_HUMAN	Q16222-3	1	0.999	7	6
Q2PZI1	Q2PZI1 D19L1_HUMAN Probable C-mannosyltransferase DPY19L1 OS=Homo sapiens OX=9606 GN=DPY19L1 PE=2 SV=1	DPY19L1	675	D19L1_HUMAN		1	0.999	6	6
Q13564	Q13564 ULA1_HUMAN NEDD8-activating enzyme E1 regulatory subunit OS=Homo sapiens OX=9606 GN=NAE1 PE=1 SV=1	NAE1	534	ULA1_HUMAN	Q13564-2, Q13564-3, Q13564-4	1	0.999	5	6
Q8WXI9	Q8WXI9 P66B_HUMAN Transcriptional repressor p66-beta OS=Homo sapiens OX=9606 GN=GATAD2B PE=1 SV=1	GATAD2B	593	P66B_HUMAN		1	0.999	6	6
Q14155-1	Q14155-1 ARHG7_HUMAN Isoform 1 of Rho guanine nucleotide exchange factor 7 OS=Homo sapiens OX=9606 GN=ARHGEF7	ARHGEF7	646	ARHG7_HUMAN	Q14155-5	1	0.999	11	5
Q9BW19	Q9BW19 KIFC1_HUMAN Kinesin-like protein KIFC1 OS=Homo sapiens OX=9606 GN=KIFC1 PE=1 SV=2	KIFC1	673	KIFC1_HUMAN		1	0.999	12	5
Q9Y3D6	Q9Y3D6 FIS1_HUMAN Mitochondrial fission 1 protein OS=Homo sapiens OX=9606 GN=FIS1 PE=1 SV=2	FIS1	152	FIS1_HUMAN		1	0.999	3	5
Q9BT22	Q9BT22 ALG1_HUMAN Chitobiosyldiphosphodolichol beta-mannosyltransferase OS=Homo sapiens OX=9606 GN=ALG1 PE=1 SV=2	ALG1	464	ALG1_HUMAN		1	0.999	5	5
P12236	P12236 ADT3_HUMAN ADP/ATP translocase 3 OS=Homo sapiens OX=9606 GN=SLC25A6 PE=1 SV=4	SLC25A6	298	ADT3_HUMAN		1	0.999	22	4
P20674	P20674 COX5A_HUMAN Cytochrome c oxidase subunit 5A, mitochondrial OS=Homo sapiens OX=9606 GN=COX5A PE=1 SV=2	COX5A	150	COX5A_HUMAN		1	0.999	5	4
O60684	O60684 IMA7_HUMAN Importin subunit alpha-7 OS=Homo sapiens OX=9606 GN=KPNA6 PE=1 SV=1	KPNA6	536	IMA7_HUMAN		1	0.999	13	4
P98179	P98179 RBM3_HUMAN RNA-binding protein 3 OS=Homo sapiens OX=9606 GN=RBM3 PE=1 SV=1	RBM3	157	RBM3_HUMAN		1	0.999	5	4
P51153	P51153 RAB13_HUMAN Ras-related protein Rab-13 OS=Homo sapiens OX=9606 GN=RAB13 PE=1 SV=1	RAB13	203	RAB13_HUMAN		1	0.999	7	4
P84090	P84090 ERH_HUMAN Enhancer of rudimentary homolog OS=Homo sapiens OX=9606 GN=ERH PE=1 SV=1	ERH	104	ERH_HUMAN		1	0.999	3	4
Q9Y3C6	Q9Y3C6 PPIL1_HUMAN Peptidyl-prolyl cis-trans isomerase-like 1 OS=Homo sapiens OX=9606 GN=PPIL1 PE=1 SV=1	PPIL1	166	PPIL1_HUMAN		1	0.999	4	4
P08754	P08754 GNAI3_HUMAN Guanine nucleotide-binding protein G(k) subunit alpha OS=Homo sapiens OX=9606 GN=GNAI3 PE=1 SV=3	GNAI3	354	GNAI3_HUMAN		1	0.999	10	4
Q9HAV7	Q9HAV7 GRPE1_HUMAN GrpE protein homolog 1, mitochondrial OS=Homo sapiens OX=9606 GN=GRPEL1 PE=1 SV=2	GRPEL1	217	GRPE1_HUMAN		1	0.999	6	4
O43813	O43813 LANC1_HUMAN Glutathione S-transferase LANCL1 OS=Homo sapiens OX=9606 GN=LANCL1 PE=1 SV=1	LANCL1	399	LANC1_HUMAN		1	0.999	6	4
Q96F86	Q96F86 EDC3_HUMAN Enhancer of mRNA-decapping protein 3 OS=Homo sapiens OX=9606 GN=EDC3 PE=1 SV=1	EDC3	508	EDC3_HUMAN		1	0.999	4	4
Q8NBJ7	Q8NBJ7 SUMF2_HUMAN Inactive C-alpha-formylglycine-generating enzyme 2 OS=Homo sapiens OX=9606 GN=SUMF2 PE=1 SV=2	SUMF2	301	SUMF2_HUMAN		1	0.999	6	4
Q9NX61	Q9NX61 T161A_HUMAN Transmembrane protein 161A OS=Homo sapiens OX=9606 GN=TMEM161A PE=1 SV=1	TMEM161A	479	T161A_HUMAN		1	0.999	3	4
O60888	O60888 CUTA_HUMAN Protein CutA OS=Homo sapiens OX=9606 GN=CUTA PE=1 SV=2	CUTA	179	CUTA_HUMAN	O60888-2, O60888-3	1	0.999	3	4
Q9NRN7	Q9NRN7 ADPPT_HUMAN L-aminoadipate-semialdehyde dehydrogenase-phosphopantetheinyl transferase OS=Homo sapiens OX=9606 GN=AASDHPPT PE=1 SV=2	AASDHPPT	309	ADPPT_HUMAN		1	0.999	5	4
O60573	O60573 IF4E2_HUMAN Eukaryotic translation initiation factor 4E type 2 OS=Homo sapiens OX=9606 GN=EIF4E2 PE=1 SV=1	EIF4E2	245	IF4E2_HUMAN	O60573-2	1	0.999	3	4
Q9BX67	Q9BX67 JAM3_HUMAN Junctional adhesion molecule C OS=Homo sapiens OX=9606 GN=JAM3 PE=1 SV=1	JAM3	310	JAM3_HUMAN	Q9BX67-2	1	0.999	3	4
Q13443	Q13443 ADAM9_HUMAN Disintegrin and metalloproteinase domain-containing protein 9 OS=Homo sapiens OX=9606 GN=ADAM9 PE=1 SV=1	ADAM9	819	ADAM9_HUMAN		1	0.999	5	4
Q15437	Q15437 SC23B_HUMAN Protein transport protein Sec23B OS=Homo sapiens OX=9606 GN=SEC23B PE=1 SV=2	SEC23B	767	SC23B_HUMAN		1	0.999	12	3
P30043	P30043 BLVRB_HUMAN Flavin reductase (NADPH) OS=Homo sapiens OX=9606 GN=BLVRB PE=1 SV=3	BLVRB	206	BLVRB_HUMAN		1	0.999	6	3
Q9H1B7	Q9H1B7 I2BPL_HUMAN Probable E3 ubiquitin-protein ligase IRF2BPL OS=Homo sapiens OX=9606 GN=IRF2BPL PE=1 SV=1	IRF2BPL	796	I2BPL_HUMAN		1	0.999	7	3
P60510	P60510 PP4C_HUMAN Serine/threonine-protein phosphatase 4 catalytic subunit OS=Homo sapiens OX=9606 GN=PPP4C PE=1 SV=1	PPP4C	307	PP4C_HUMAN		1	0.999	7	3
Q13405	Q13405 RM49_HUMAN 39S ribosomal protein L49, mitochondrial OS=Homo sapiens OX=9606 GN=MRPL49 PE=1 SV=1	MRPL49	166	RM49_HUMAN		1	0.999	5	3
Q99541	Q99541 PLIN2_HUMAN Perilipin-2 OS=Homo sapiens OX=9606 GN=PLIN2 PE=1 SV=2	PLIN2	437	PLIN2_HUMAN		1	0.999	4	3
Q96EY8	Q96EY8 MMAB_HUMAN Corrinoid adenosyltransferase OS=Homo sapiens OX=9606 GN=MMAB PE=1 SV=1	MMAB	250	MMAB_HUMAN		1	0.999	6	3
O43818	O43818 U3IP2_HUMAN U3 small nucleolar RNA-interacting protein 2 OS=Homo sapiens OX=9606 GN=RRP9 PE=1 SV=1	RRP9	475	U3IP2_HUMAN		1	0.999	7	3
O75608	O75608 LYPA1_HUMAN Acyl-protein thioesterase 1 OS=Homo sapiens OX=9606 GN=LYPLA1 PE=1 SV=1	LYPLA1	230	LYPA1_HUMAN		1	0.999	5	3
O43427	O43427 FIBP_HUMAN Acidic fibroblast growth factor intracellular-binding protein OS=Homo sapiens OX=9606 GN=FIBP PE=1 SV=3	FIBP	364	FIBP_HUMAN	O43427-2	1	0.999	3	3
O14604	O14604 TYB4Y_HUMAN Thymosin beta-4, Y-chromosomal OS=Homo sapiens OX=9606 GN=TMSB4Y PE=1 SV=3	TMSB4Y	44	TYB4Y_HUMAN		1	0.9987	1	3
P17568	P17568 NDUB7_HUMAN NADH dehydrogenase [ubiquinone] 1 beta subcomplex subunit 7 OS=Homo sapiens OX=9606 GN=NDUFB7 PE=1 SV=4	NDUFB7	137	NDUB7_HUMAN		1	0.999	4	3
Q6JQN1	Q6JQN1 ACD10_HUMAN Acyl-CoA dehydrogenase family member 10 OS=Homo sapiens OX=9606 GN=ACAD10 PE=1 SV=1	ACAD10	1059	ACD10_HUMAN	Q6JQN1-2, Q6JQN1-5	1	0.999	6	3
Q6P1M0	Q6P1M0 S27A4_HUMAN Long-chain fatty acid transport protein 4 OS=Homo sapiens OX=9606 GN=SLC27A4 PE=1 SV=1	SLC27A4	643	S27A4_HUMAN		1	0.999	5	3
Q9BUN8	Q9BUN8 DERL1_HUMAN Derlin-1 OS=Homo sapiens OX=9606 GN=DERL1 PE=1 SV=1	DERL1	251	DERL1_HUMAN	Q9BUN8-2	1	0.999	5	3
Q01844	Q01844 EWS_HUMAN RNA-binding protein EWS OS=Homo sapiens OX=9606 GN=EWSR1 PE=1 SV=1	EWSR1	656	EWS_HUMAN	Q01844-2, Q01844-3, Q01844-5, Q01844-6	1	0.999	3	3
P12035	P12035 K2C3_HUMAN Keratin, type II cytoskeletal 3 OS=Homo sapiens OX=9606 GN=KRT3 PE=1 SV=3	KRT3	628	K2C3_HUMAN		1	0.999	28	2
P19387	P19387 RPB3_HUMAN DNA-directed RNA polymerase II subunit RPB3 OS=Homo sapiens OX=9606 GN=POLR2C PE=1 SV=2	POLR2C	275	RPB3_HUMAN		1	0.999	6	2
P47813	P47813 IF1AX_HUMAN Eukaryotic translation initiation factor 1A, X-chromosomal OS=Homo sapiens OX=9606 GN=EIF1AX PE=1 SV=2	EIF1AX	144	IF1AX_HUMAN		1	0.999	5	2
O95777	O95777 LSM8_HUMAN U6 snRNA-associated Sm-like protein LSm8 OS=Homo sapiens OX=9606 GN=LSM8 PE=1 SV=3	LSM8	96	LSM8_HUMAN		1	0.999	2	2
Q13617	Q13617 CUL2_HUMAN Cullin-2 OS=Homo sapiens OX=9606 GN=CUL2 PE=1 SV=2	CUL2	745	CUL2_HUMAN	Q13617-2	1	0.999	13	2
Q15024	Q15024 EXOS7_HUMAN Exosome complex component RRP42 OS=Homo sapiens OX=9606 GN=EXOSC7 PE=1 SV=3	EXOSC7	291	EXOS7_HUMAN		1	0.999	3	2
Q9NVE7	Q9NVE7 PANK4_HUMAN Pantothenate kinase 4 OS=Homo sapiens OX=9606 GN=PANK4 PE=1 SV=1	PANK4	773	PANK4_HUMAN		1	0.999	9	2
A6NIH7	A6NIH7 U119B_HUMAN Protein unc-119 homolog B OS=Homo sapiens OX=9606 GN=UNC119B PE=1 SV=1	UNC119B	251	U119B_HUMAN		1	0.999	5	2
Q8IV48	Q8IV48 ERI1_HUMAN 3'-5' exoribonuclease 1 OS=Homo sapiens OX=9606 GN=ERI1 PE=1 SV=3	ERI1	349	ERI1_HUMAN		1	0.999	4	2
Q8WVJ2	Q8WVJ2 NUDC2_HUMAN NudC domain-containing protein 2 OS=Homo sapiens OX=9606 GN=NUDCD2 PE=1 SV=1	NUDCD2	157	NUDC2_HUMAN		1	0.999	3	2
Q96EM0	Q96EM0 T3HPD_HUMAN Trans-3-hydroxy-L-proline dehydratase OS=Homo sapiens OX=9606 GN=L3HYPDH PE=1 SV=2	L3HYPDH	354	T3HPD_HUMAN		1	0.999	5	2
Q96KR1	Q96KR1 ZFR_HUMAN Zinc finger RNA-binding protein OS=Homo sapiens OX=9606 GN=ZFR PE=1 SV=2	ZFR	1074	ZFR_HUMAN		1	0.999	7	2
Q9NUD5	Q9NUD5 ZCHC3_HUMAN Zinc finger CCHC domain-containing protein 3 OS=Homo sapiens OX=9606 GN=ZCCHC3 PE=1 SV=2	ZCCHC3	403	ZCHC3_HUMAN		1	0.999	5	2
Q96CN7	Q96CN7 ISOC1_HUMAN Isochorismatase domain-containing protein 1 OS=Homo sapiens OX=9606 GN=ISOC1 PE=1 SV=3	ISOC1	298	ISOC1_HUMAN		1	0.999	6	2
Q12834	Q12834 CDC20_HUMAN Cell division cycle protein 20 homolog OS=Homo sapiens OX=9606 GN=CDC20 PE=1 SV=2	CDC20	499	CDC20_HUMAN		1	0.999	2	2
P32455	P32455 GBP1_HUMAN Guanylate-binding protein 1 OS=Homo sapiens OX=9606 GN=GBP1 PE=1 SV=2	GBP1	592	GBP1_HUMAN		0.9926	0.999	2	2
Q01469	Q01469 FABP5_HUMAN Fatty acid-binding protein 5 OS=Homo sapiens OX=9606 GN=FABP5 PE=1 SV=3	FABP5	135	FABP5_HUMAN		1	0.999	7	1
P61803	P61803 DAD1_HUMAN Dolichyl-diphosphooligosaccharide--protein glycosyltransferase subunit DAD1 OS=Homo sapiens OX=9606 GN=DAD1 PE=1 SV=3	DAD1	113	DAD1_HUMAN		1	0.999	4	1
P17252	P17252 KPCA_HUMAN Protein kinase C alpha type OS=Homo sapiens OX=9606 GN=PRKCA PE=1 SV=4	PRKCA	672	KPCA_HUMAN		1	0.999	10	1
Q9GZS3	Q9GZS3 WDR61_HUMAN WD repeat-containing protein 61 OS=Homo sapiens OX=9606 GN=WDR61 PE=1 SV=1	WDR61	305	WDR61_HUMAN		1	0.999	8	1
Q96DG6	Q96DG6 CMBL_HUMAN Carboxymethylenebutenolidase homolog OS=Homo sapiens OX=9606 GN=CMBL PE=1 SV=1	CMBL	245	CMBL_HUMAN		1	0.999	6	1
P46109	P46109 CRKL_HUMAN Crk-like protein OS=Homo sapiens OX=9606 GN=CRKL PE=1 SV=1	CRKL	303	CRKL_HUMAN		1	0.999	5	1
Q8NBL1	Q8NBL1 PGLT1_HUMAN Protein O-glucosyltransferase 1 OS=Homo sapiens OX=9606 GN=POGLUT1 PE=1 SV=1	POGLUT1	392	PGLT1_HUMAN		1	0.999	5	1
Q15031	Q15031 SYLM_HUMAN Probable leucine--tRNA ligase, mitochondrial OS=Homo sapiens OX=9606 GN=LARS2 PE=1 SV=2	LARS2	903	SYLM_HUMAN		1	0.999	6	1
Q7RTV0	Q7RTV0 PHF5A_HUMAN PHD finger-like domain-containing protein 5A OS=Homo sapiens OX=9606 GN=PHF5A PE=1 SV=1	PHF5A	110	PHF5A_HUMAN		1	0.999	3	1
Q9HC52	Q9HC52 CBX8_HUMAN Chromobox protein homolog 8 OS=Homo sapiens OX=9606 GN=CBX8 PE=1 SV=3	CBX8	389	CBX8_HUMAN		1	0.999	4	1
Q9P0M9	Q9P0M9 RM27_HUMAN 39S ribosomal protein L27, mitochondrial OS=Homo sapiens OX=9606 GN=MRPL27 PE=1 SV=1	MRPL27	148	RM27_HUMAN		1	0.999	4	1
Q9UIV1	Q9UIV1 CNOT7_HUMAN CCR4-NOT transcription complex subunit 7 OS=Homo sapiens OX=9606 GN=CNOT7 PE=1 SV=3	CNOT7	285	CNOT7_HUMAN	Q9UIV1-2	1	0.999	3	1
O76054	O76054 S14L2_HUMAN SEC14-like protein 2 OS=Homo sapiens OX=9606 GN=SEC14L2 PE=1 SV=1	SEC14L2	403	S14L2_HUMAN	O76054-5	1	0.999	4	1
P58511	P58511 SI11A_HUMAN Small integral membrane protein 11A OS=Homo sapiens OX=9606 GN=SMIM11A PE=2 SV=1	SMIM11A	58	SI11A_HUMAN		0.9308	0.999	1	1
Q8NHP8	Q8NHP8 PLBL2_HUMAN Putative phospholipase B-like 2 OS=Homo sapiens OX=9606 GN=PLBD2 PE=1 SV=2	PLBD2	589	PLBL2_HUMAN		1	0.999	3	1
Q9HBH5	Q9HBH5 RDH14_HUMAN Retinol dehydrogenase 14 OS=Homo sapiens OX=9606 GN=RDH14 PE=1 SV=1	RDH14	336	RDH14_HUMAN		1	0.999	3	1
P04156	P04156 PRIO_HUMAN Major prion protein OS=Homo sapiens OX=9606 GN=PRNP PE=1 SV=1	PRNP	253	PRIO_HUMAN		1	0.999	2	1
Q9HCM4	Q9HCM4 E41L5_HUMAN Band 4.1-like protein 5 OS=Homo sapiens OX=9606 GN=EPB41L5 PE=1 SV=3	EPB41L5	733	E41L5_HUMAN	Q9HCM4-2, Q9HCM4-3, Q9HCM4-4	1	0.999	2	1
P06753-2	P06753-2 TPM3_HUMAN Isoform 2 of Tropomyosin alpha-3 chain OS=Homo sapiens OX=9606 GN=TPM3	TPM3	248	TPM3_HUMAN		1	0.999	21	24
Q9BZZ5-2	Q9BZZ5-2 API5_HUMAN Isoform 2 of Apoptosis inhibitor 5 OS=Homo sapiens OX=9606 GN=API5	API5	504	API5_HUMAN		1	0.999	14	18
O14579	O14579 COPE_HUMAN Coatomer subunit epsilon OS=Homo sapiens OX=9606 GN=COPE PE=1 SV=3	COPE	308	COPE_HUMAN		1	0.999	9	17
Q9Y6E2	Q9Y6E2 BZW2_HUMAN Basic leucine zipper and W2 domain-containing protein 2 OS=Homo sapiens OX=9606 GN=BZW2 PE=1 SV=1	BZW2	419	BZW2_HUMAN		1	0.999	10	16
O43681	O43681 ASNA_HUMAN ATPase ASNA1 OS=Homo sapiens OX=9606 GN=ASNA1 PE=1 SV=2	ASNA1	348	ASNA_HUMAN		1	0.999	9	15
O15143	O15143 ARC1B_HUMAN Actin-related protein 2/3 complex subunit 1B OS=Homo sapiens OX=9606 GN=ARPC1B PE=1 SV=3	ARPC1B	372	ARC1B_HUMAN		1	0.999	13	14
Q16543	Q16543 CDC37_HUMAN Hsp90 co-chaperone Cdc37 OS=Homo sapiens OX=9606 GN=CDC37 PE=1 SV=1	CDC37	378	CDC37_HUMAN		1	0.999	10	14
Q15819	Q15819 UB2V2_HUMAN Ubiquitin-conjugating enzyme E2 variant 2 OS=Homo sapiens OX=9606 GN=UBE2V2 PE=1 SV=4	UBE2V2	145	UB2V2_HUMAN		1	0.999	7	13
Q92520	Q92520 FAM3C_HUMAN Protein FAM3C OS=Homo sapiens OX=9606 GN=FAM3C PE=1 SV=1	FAM3C	227	FAM3C_HUMAN		1	0.999	8	13
Q96HJ9-2	Q96HJ9-2 FMC1_HUMAN Isoform 2 of Protein FMC1 homolog OS=Homo sapiens OX=9606 GN=FMC1	FMC1	458	FMC1_HUMAN		0.9999	0.999	14	13
Q14318-2	Q14318-2 FKBP8_HUMAN Isoform 2 of Peptidyl-prolyl cis-trans isomerase FKBP8 OS=Homo sapiens OX=9606 GN=FKBP8	FKBP8	413	FKBP8_HUMAN		1	0.999	9	13
Q14739	Q14739 LBR_HUMAN Delta(14)-sterol reductase OS=Homo sapiens OX=9606 GN=LBR PE=1 SV=2	LBR	615	LBR_HUMAN		1	0.999	10	12
Q9UP83-2	Q9UP83-2 COG5_HUMAN Isoform 2 of Conserved oligomeric Golgi complex subunit 5 OS=Homo sapiens OX=9606 GN=COG5	COG5	860	COG5_HUMAN	Q9UP83-3	1	0.999	11	12
O00629	O00629 IMA3_HUMAN Importin subunit alpha-3 OS=Homo sapiens OX=9606 GN=KPNA4 PE=1 SV=1	KPNA4	521	IMA3_HUMAN		1	0.999	11	11
Q86V81	Q86V81 THOC4_HUMAN THO complex subunit 4 OS=Homo sapiens OX=9606 GN=ALYREF PE=1 SV=3	ALYREF	257	THOC4_HUMAN		1	0.999	7	11
Q9BQE3	Q9BQE3 TBA1C_HUMAN Tubulin alpha-1C chain OS=Homo sapiens OX=9606 GN=TUBA1C PE=1 SV=1	TUBA1C	449	TBA1C_HUMAN		1	0.999	38	10
O76003	O76003 GLRX3_HUMAN Glutaredoxin-3 OS=Homo sapiens OX=9606 GN=GLRX3 PE=1 SV=2	GLRX3	335	GLRX3_HUMAN		1	0.999	12	10
Q99719	Q99719 SEPT5_HUMAN Septin-5 OS=Homo sapiens OX=9606 GN=SEPT5 PE=1 SV=1	44809	369	SEPT5_HUMAN		1	0.999	11	10
P43487	P43487 RANG_HUMAN Ran-specific GTPase-activating protein OS=Homo sapiens OX=9606 GN=RANBP1 PE=1 SV=1	RANBP1	201	RANG_HUMAN	P43487-2	1	0.999	7	10
Q9UBT2	Q9UBT2 SAE2_HUMAN SUMO-activating enzyme subunit 2 OS=Homo sapiens OX=9606 GN=UBA2 PE=1 SV=2	UBA2	640	SAE2_HUMAN		1	0.999	14	9
Q969H8	Q969H8 MYDGF_HUMAN Myeloid-derived growth factor OS=Homo sapiens OX=9606 GN=MYDGF PE=1 SV=1	MYDGF	173	MYDGF_HUMAN		1	0.999	6	9
Q13217	Q13217 DNJC3_HUMAN DnaJ homolog subfamily C member 3 OS=Homo sapiens OX=9606 GN=DNAJC3 PE=1 SV=1	DNAJC3	504	DNJC3_HUMAN		1	0.999	9	9
Q8IWT6	Q8IWT6 LRC8A_HUMAN Volume-regulated anion channel subunit LRRC8A OS=Homo sapiens OX=9606 GN=LRRC8A PE=1 SV=1	LRRC8A	810	LRC8A_HUMAN		1	0.999	13	9
Q9H0U3	Q9H0U3 MAGT1_HUMAN Magnesium transporter protein 1 OS=Homo sapiens OX=9606 GN=MAGT1 PE=1 SV=1	MAGT1	335	MAGT1_HUMAN		1	0.999	7	9
Q9NX47	Q9NX47 MARH5_HUMAN E3 ubiquitin-protein ligase MARCH5 OS=Homo sapiens OX=9606 GN=MARCH5 PE=1 SV=1	44625	278	MARH5_HUMAN		1	0.999	4	9
O95197-3	O95197-3 RTN3_HUMAN Isoform 3 of Reticulon-3 OS=Homo sapiens OX=9606 GN=RTN3	RTN3	236	RTN3_HUMAN		1	0.999	7	8
P00568	P00568 KAD1_HUMAN Adenylate kinase isoenzyme 1 OS=Homo sapiens OX=9606 GN=AK1 PE=1 SV=3	AK1	194	KAD1_HUMAN		1	0.999	8	8
P49773	P49773 HINT1_HUMAN Histidine triad nucleotide-binding protein 1 OS=Homo sapiens OX=9606 GN=HINT1 PE=1 SV=2	HINT1	126	HINT1_HUMAN		1	0.999	7	8
Q08380	Q08380 LG3BP_HUMAN Galectin-3-binding protein OS=Homo sapiens OX=9606 GN=LGALS3BP PE=1 SV=1	LGALS3BP	585	LG3BP_HUMAN		1	0.999	10	8
Q92544	Q92544 TM9S4_HUMAN Transmembrane 9 superfamily member 4 OS=Homo sapiens OX=9606 GN=TM9SF4 PE=1 SV=2	TM9SF4	642	TM9S4_HUMAN		1	0.999	6	8
Q9Y3A3	Q9Y3A3 PHOCN_HUMAN MOB-like protein phocein OS=Homo sapiens OX=9606 GN=MOB4 PE=1 SV=1	MOB4	225	PHOCN_HUMAN	Q9Y3A3-2, Q9Y3A3-3	1	0.999	4	8
P30049	P30049 ATPD_HUMAN ATP synthase subunit delta, mitochondrial OS=Homo sapiens OX=9606 GN=ATP5F1D PE=1 SV=2	ATP5F1D	168	ATPD_HUMAN		1	0.999	4	7
P60983	P60983 GMFB_HUMAN Glia maturation factor beta OS=Homo sapiens OX=9606 GN=GMFB PE=1 SV=2	GMFB	142	GMFB_HUMAN		1	0.999	7	7
Q99459	Q99459 CDC5L_HUMAN Cell division cycle 5-like protein OS=Homo sapiens OX=9606 GN=CDC5L PE=1 SV=2	CDC5L	802	CDC5L_HUMAN		1	0.999	14	7
Q02818	Q02818 NUCB1_HUMAN Nucleobindin-1 OS=Homo sapiens OX=9606 GN=NUCB1 PE=1 SV=4	NUCB1	461	NUCB1_HUMAN		1	0.999	10	7
Q9Y619	Q9Y619 ORNT1_HUMAN Mitochondrial ornithine transporter 1 OS=Homo sapiens OX=9606 GN=SLC25A15 PE=1 SV=1	SLC25A15	301	ORNT1_HUMAN		1	0.999	3	7
P09012	P09012 SNRPA_HUMAN U1 small nuclear ribonucleoprotein A OS=Homo sapiens OX=9606 GN=SNRPA PE=1 SV=3	SNRPA	282	SNRPA_HUMAN		1	0.999	5	6
Q9Y333	Q9Y333 LSM2_HUMAN U6 snRNA-associated Sm-like protein LSm2 OS=Homo sapiens OX=9606 GN=LSM2 PE=1 SV=1	LSM2	95	LSM2_HUMAN		1	0.999	5	6
P61254	P61254 RL26_HUMAN 60S ribosomal protein L26 OS=Homo sapiens OX=9606 GN=RPL26 PE=1 SV=1	RPL26	145	RL26_HUMAN		1	0.999	12	6
Q99805	Q99805 TM9S2_HUMAN Transmembrane 9 superfamily member 2 OS=Homo sapiens OX=9606 GN=TM9SF2 PE=1 SV=1	TM9SF2	663	TM9S2_HUMAN		1	0.999	7	6
Q96GK7	Q96GK7 FAH2A_HUMAN Fumarylacetoacetate hydrolase domain-containing protein 2A OS=Homo sapiens OX=9606 GN=FAHD2A PE=1 SV=1	FAHD2A	314	FAH2A_HUMAN		1	0.999	6	6
Q96JJ7	Q96JJ7 TMX3_HUMAN Protein disulfide-isomerase TMX3 OS=Homo sapiens OX=9606 GN=TMX3 PE=1 SV=2	TMX3	454	TMX3_HUMAN		1	0.999	5	6
O60613	O60613 SEP15_HUMAN Selenoprotein F OS=Homo sapiens OX=9606 GN=SELENOF PE=1 SV=4	SELENOF	165	SEP15_HUMAN		1	0.999	4	6
Q00059	Q00059 TFAM_HUMAN Transcription factor A, mitochondrial OS=Homo sapiens OX=9606 GN=TFAM PE=1 SV=1	TFAM	246	TFAM_HUMAN		1	0.999	5	6
P47914	P47914 RL29_HUMAN 60S ribosomal protein L29 OS=Homo sapiens OX=9606 GN=RPL29 PE=1 SV=2	RPL29	159	RL29_HUMAN		0.9999	0.999	2	5
Q9UL42	Q9UL42 PNMA2_HUMAN Paraneoplastic antigen Ma2 OS=Homo sapiens OX=9606 GN=PNMA2 PE=1 SV=2	PNMA2	364	PNMA2_HUMAN		1	0.999	8	5
P62877	P62877 RBX1_HUMAN E3 ubiquitin-protein ligase RBX1 OS=Homo sapiens OX=9606 GN=RBX1 PE=1 SV=1	RBX1	108	RBX1_HUMAN		1	0.999	3	5
Q9H4A4	Q9H4A4 AMPB_HUMAN Aminopeptidase B OS=Homo sapiens OX=9606 GN=RNPEP PE=1 SV=2	RNPEP	650	AMPB_HUMAN		1	0.999	10	5
O43347	O43347 MSI1H_HUMAN RNA-binding protein Musashi homolog 1 OS=Homo sapiens OX=9606 GN=MSI1 PE=1 SV=1	MSI1	362	MSI1H_HUMAN		1	0.999	7	5
Q9C0D9	Q9C0D9 EPT1_HUMAN Ethanolaminephosphotransferase 1 OS=Homo sapiens OX=9606 GN=SELENOI PE=1 SV=3	SELENOI	397	EPT1_HUMAN		1	0.999	2	5
P36551	P36551 HEM6_HUMAN Oxygen-dependent coproporphyrinogen-III oxidase, mitochondrial OS=Homo sapiens OX=9606 GN=CPOX PE=1 SV=3	CPOX	454	HEM6_HUMAN		1	0.999	7	5
Q6NXR4	Q6NXR4 TTI2_HUMAN TELO2-interacting protein 2 OS=Homo sapiens OX=9606 GN=TTI2 PE=1 SV=1	TTI2	508	TTI2_HUMAN		1	0.999	4	5
O14672	O14672 ADA10_HUMAN Disintegrin and metalloproteinase domain-containing protein 10 OS=Homo sapiens OX=9606 GN=ADAM10 PE=1 SV=1	ADAM10	748	ADA10_HUMAN		1	0.999	5	5
Q9UEW8	Q9UEW8 STK39_HUMAN STE20/SPS1-related proline-alanine-rich protein kinase OS=Homo sapiens OX=9606 GN=STK39 PE=1 SV=3	STK39	545	STK39_HUMAN	Q9UEW8-2	1	0.999	6	5
P30419	P30419 NMT1_HUMAN Glycylpeptide N-tetradecanoyltransferase 1 OS=Homo sapiens OX=9606 GN=NMT1 PE=1 SV=2	NMT1	496	NMT1_HUMAN	P30419-2	1	0.999	5	5
P29373	P29373 RABP2_HUMAN Cellular retinoic acid-binding protein 2 OS=Homo sapiens OX=9606 GN=CRABP2 PE=1 SV=2	CRABP2	138	RABP2_HUMAN		1	0.999	10	4
P78406	P78406 RAE1L_HUMAN mRNA export factor OS=Homo sapiens OX=9606 GN=RAE1 PE=1 SV=1	RAE1	368	RAE1L_HUMAN		1	0.999	9	4
P61970	P61970 NTF2_HUMAN Nuclear transport factor 2 OS=Homo sapiens OX=9606 GN=NUTF2 PE=1 SV=1	NUTF2	127	NTF2_HUMAN		1	0.999	4	4
P82921	P82921 RT21_HUMAN 28S ribosomal protein S21, mitochondrial OS=Homo sapiens OX=9606 GN=MRPS21 PE=1 SV=3	MRPS21	87	RT21_HUMAN		1	0.999	2	4
Q8IVD9	Q8IVD9 NUDC3_HUMAN NudC domain-containing protein 3 OS=Homo sapiens OX=9606 GN=NUDCD3 PE=1 SV=3	NUDCD3	361	NUDC3_HUMAN		1	0.999	11	4
O00461	O00461 GOLI4_HUMAN Golgi integral membrane protein 4 OS=Homo sapiens OX=9606 GN=GOLIM4 PE=1 SV=1	GOLIM4	696	GOLI4_HUMAN		1	0.999	8	4
Q9Y5S9	Q9Y5S9 RBM8A_HUMAN RNA-binding protein 8A OS=Homo sapiens OX=9606 GN=RBM8A PE=1 SV=1	RBM8A	174	RBM8A_HUMAN	Q9Y5S9-2	1	0.999	7	4
P27707	P27707 DCK_HUMAN Deoxycytidine kinase OS=Homo sapiens OX=9606 GN=DCK PE=1 SV=1	DCK	260	DCK_HUMAN		1	0.999	5	4
Q9P032	Q9P032 NDUF4_HUMAN NADH dehydrogenase [ubiquinone] 1 alpha subcomplex assembly factor 4 OS=Homo sapiens OX=9606 GN=NDUFAF4 PE=1 SV=1	NDUFAF4	175	NDUF4_HUMAN		1	0.999	3	4
Q9UFC0	Q9UFC0 LRWD1_HUMAN Leucine-rich repeat and WD repeat-containing protein 1 OS=Homo sapiens OX=9606 GN=LRWD1 PE=1 SV=2	LRWD1	647	LRWD1_HUMAN		1	0.999	7	4
Q14696	Q14696 MESD_HUMAN LRP chaperone MESD OS=Homo sapiens OX=9606 GN=MESD PE=1 SV=2	MESD	234	MESD_HUMAN		1	0.999	5	4
P50579	P50579 MAP2_HUMAN Methionine aminopeptidase 2 OS=Homo sapiens OX=9606 GN=METAP2 PE=1 SV=1	METAP2	478	MAP2_HUMAN	P50579-2, P50579-3	1	0.999	7	4
Q9Y3Q3	Q9Y3Q3 TMED3_HUMAN Transmembrane emp24 domain-containing protein 3 OS=Homo sapiens OX=9606 GN=TMED3 PE=1 SV=1	TMED3	217	TMED3_HUMAN		1	0.999	4	4
P21926	P21926 CD9_HUMAN CD9 antigen OS=Homo sapiens OX=9606 GN=CD9 PE=1 SV=4	CD9	228	CD9_HUMAN		1	0.999	3	4
P62891	P62891 RL39_HUMAN 60S ribosomal protein L39 OS=Homo sapiens OX=9606 GN=RPL39 PE=1 SV=2	RPL39	51	RL39_HUMAN	Q59GN2	1	0.999	3	3
Q9UKG1	Q9UKG1 DP13A_HUMAN DCC-interacting protein 13-alpha OS=Homo sapiens OX=9606 GN=APPL1 PE=1 SV=1	APPL1	709	DP13A_HUMAN		1	0.999	11	3
Q14651	Q14651 PLSI_HUMAN Plastin-1 OS=Homo sapiens OX=9606 GN=PLS1 PE=1 SV=2	PLS1	629	PLSI_HUMAN		1	0.999	8	3
Q9H3P7	Q9H3P7 GCP60_HUMAN Golgi resident protein GCP60 OS=Homo sapiens OX=9606 GN=ACBD3 PE=1 SV=4	ACBD3	528	GCP60_HUMAN		1	0.999	5	3
P46934-4	P46934-4 NEDD4_HUMAN Isoform 4 of E3 ubiquitin-protein ligase NEDD4 OS=Homo sapiens OX=9606 GN=NEDD4	NEDD4	900	NEDD4_HUMAN		0.9999	0.999	3	3
Q16186	Q16186 ADRM1_HUMAN Proteasomal ubiquitin receptor ADRM1 OS=Homo sapiens OX=9606 GN=ADRM1 PE=1 SV=2	ADRM1	407	ADRM1_HUMAN		1	0.999	3	3
Q5RKV6	Q5RKV6 EXOS6_HUMAN Exosome complex component MTR3 OS=Homo sapiens OX=9606 GN=EXOSC6 PE=1 SV=1	EXOSC6	272	EXOS6_HUMAN		1	0.999	4	3
Q9Y676	Q9Y676 RT18B_HUMAN 28S ribosomal protein S18b, mitochondrial OS=Homo sapiens OX=9606 GN=MRPS18B PE=1 SV=1	MRPS18B	258	RT18B_HUMAN		1	0.999	5	3
Q9H444	Q9H444 CHM4B_HUMAN Charged multivesicular body protein 4b OS=Homo sapiens OX=9606 GN=CHMP4B PE=1 SV=1	CHMP4B	224	CHM4B_HUMAN		1	0.999	5	3
Q6UW68	Q6UW68 TM205_HUMAN Transmembrane protein 205 OS=Homo sapiens OX=9606 GN=TMEM205 PE=1 SV=1	TMEM205	189	TM205_HUMAN		1	0.999	4	3
Q9Y241	Q9Y241 HIG1A_HUMAN HIG1 domain family member 1A, mitochondrial OS=Homo sapiens OX=9606 GN=HIGD1A PE=1 SV=1	HIGD1A	93	HIG1A_HUMAN	Q9Y241-2	1	0.999	3	3
Q5T160	Q5T160 SYRM_HUMAN Probable arginine--tRNA ligase, mitochondrial OS=Homo sapiens OX=9606 GN=RARS2 PE=1 SV=1	RARS2	578	SYRM_HUMAN		1	0.999	4	3
Q8NFH3	Q8NFH3 NUP43_HUMAN Nucleoporin Nup43 OS=Homo sapiens OX=9606 GN=NUP43 PE=1 SV=1	NUP43	380	NUP43_HUMAN		1	0.999	2	3
P19105	P19105 ML12A_HUMAN Myosin regulatory light chain 12A OS=Homo sapiens OX=9606 GN=MYL12A PE=1 SV=2	MYL12A	171	ML12A_HUMAN		1	0.999	9	2
P0C0S5	P0C0S5 H2AZ_HUMAN Histone H2A.Z OS=Homo sapiens OX=9606 GN=H2AFZ PE=1 SV=2	H2AFZ	128	H2AZ_HUMAN	Q71UI9	1	0.999	6	2
Q16740	Q16740 CLPP_HUMAN ATP-dependent Clp protease proteolytic subunit, mitochondrial OS=Homo sapiens OX=9606 GN=CLPP PE=1 SV=1	CLPP	277	CLPP_HUMAN		1	0.999	6	2
O00186	O00186 STXB3_HUMAN Syntaxin-binding protein 3 OS=Homo sapiens OX=9606 GN=STXBP3 PE=1 SV=2	STXBP3	592	STXB3_HUMAN		1	0.999	8	2
P49207	P49207 RL34_HUMAN 60S ribosomal protein L34 OS=Homo sapiens OX=9606 GN=RPL34 PE=1 SV=3	RPL34	117	RL34_HUMAN		1	0.999	3	2
P19388	P19388 RPAB1_HUMAN DNA-directed RNA polymerases I, II, and III subunit RPABC1 OS=Homo sapiens OX=9606 GN=POLR2E PE=1 SV=4	POLR2E	210	RPAB1_HUMAN		1	0.999	4	2
Q9NPD3	Q9NPD3 EXOS4_HUMAN Exosome complex component RRP41 OS=Homo sapiens OX=9606 GN=EXOSC4 PE=1 SV=3	EXOSC4	245	EXOS4_HUMAN		1	0.999	5	2
Q9P0S9	Q9P0S9 TM14C_HUMAN Transmembrane protein 14C OS=Homo sapiens OX=9606 GN=TMEM14C PE=1 SV=1	TMEM14C	112	TM14C_HUMAN		1	0.999	2	2
Q96A26	Q96A26 F162A_HUMAN Protein FAM162A OS=Homo sapiens OX=9606 GN=FAM162A PE=1 SV=2	FAM162A	154	F162A_HUMAN		1	0.999	4	2
Q3ZCM7	Q3ZCM7 TBB8_HUMAN Tubulin beta-8 chain OS=Homo sapiens OX=9606 GN=TUBB8 PE=1 SV=2	TUBB8	444	TBB8_HUMAN		1	0.999	11	2
Q9NVP2	Q9NVP2 ASF1B_HUMAN Histone chaperone ASF1B OS=Homo sapiens OX=9606 GN=ASF1B PE=1 SV=1	ASF1B	202	ASF1B_HUMAN		1	0.999	2	2
O75817	O75817 POP7_HUMAN Ribonuclease P protein subunit p20 OS=Homo sapiens OX=9606 GN=POP7 PE=1 SV=2	POP7	140	POP7_HUMAN		1	0.999	3	2
Q16763	Q16763 UBE2S_HUMAN Ubiquitin-conjugating enzyme E2 S OS=Homo sapiens OX=9606 GN=UBE2S PE=1 SV=2	UBE2S	222	UBE2S_HUMAN		1	0.999	3	2
Q4G0F5	Q4G0F5 VP26B_HUMAN Vacuolar protein sorting-associated protein 26B OS=Homo sapiens OX=9606 GN=VPS26B PE=1 SV=2	VPS26B	336	VP26B_HUMAN		1	0.999	6	2
P48723	P48723 HSP13_HUMAN Heat shock 70 kDa protein 13 OS=Homo sapiens OX=9606 GN=HSPA13 PE=1 SV=1	HSPA13	471	HSP13_HUMAN		1	0.999	4	2
Q13232	Q13232 NDK3_HUMAN Nucleoside diphosphate kinase 3 OS=Homo sapiens OX=9606 GN=NME3 PE=1 SV=2	NME3	169	NDK3_HUMAN		1	0.999	5	2
O00401	O00401 WASL_HUMAN Neural Wiskott-Aldrich syndrome protein OS=Homo sapiens OX=9606 GN=WASL PE=1 SV=2	WASL	505	WASL_HUMAN		0.9973	0.999	2	2
P53350	P53350 PLK1_HUMAN Serine/threonine-protein kinase PLK1 OS=Homo sapiens OX=9606 GN=PLK1 PE=1 SV=1	PLK1	603	PLK1_HUMAN		1	0.999	4	2
Q9BRJ7	Q9BRJ7 TIRR_HUMAN Tudor-interacting repair regulator protein OS=Homo sapiens OX=9606 GN=NUDT16L1 PE=1 SV=1	NUDT16L1	211	TIRR_HUMAN		1	0.999	3	2
Q9BYT8	Q9BYT8 NEUL_HUMAN Neurolysin, mitochondrial OS=Homo sapiens OX=9606 GN=NLN PE=1 SV=1	NLN	704	NEUL_HUMAN		1	0.999	5	2
Q9H0C8	Q9H0C8 ILKAP_HUMAN Integrin-linked kinase-associated serine/threonine phosphatase 2C OS=Homo sapiens OX=9606 GN=ILKAP PE=1 SV=1	ILKAP	392	ILKAP_HUMAN		1	0.999	5	2
P49840	P49840 GSK3A_HUMAN Glycogen synthase kinase-3 alpha OS=Homo sapiens OX=9606 GN=GSK3A PE=1 SV=2	GSK3A	483	GSK3A_HUMAN		1	0.999	3	2
Q9Y375	Q9Y375 CIA30_HUMAN Complex I intermediate-associated protein 30, mitochondrial OS=Homo sapiens OX=9606 GN=NDUFAF1 PE=1 SV=2	NDUFAF1	327	CIA30_HUMAN		1	0.999	5	2
P46108	P46108 CRK_HUMAN Adapter molecule crk OS=Homo sapiens OX=9606 GN=CRK PE=1 SV=2	CRK	304	CRK_HUMAN	P46108-2	1	0.999	2	2
Q5VIR6-4	Q5VIR6-4 VPS53_HUMAN Isoform 4 of Vacuolar protein sorting-associated protein 53 homolog OS=Homo sapiens OX=9606 GN=VPS53	VPS53	832	VPS53_HUMAN		1	0.999	3	2
Q9UNI6	Q9UNI6 DUS12_HUMAN Dual specificity protein phosphatase 12 OS=Homo sapiens OX=9606 GN=DUSP12 PE=1 SV=1	DUSP12	340	DUS12_HUMAN		1	0.999	3	2
P01112	P01112 RASH_HUMAN GTPase HRas OS=Homo sapiens OX=9606 GN=HRAS PE=1 SV=1	HRAS	189	RASH_HUMAN		1	0.999	5	2
P03891	P03891 NU2M_HUMAN NADH-ubiquinone oxidoreductase chain 2 OS=Homo sapiens OX=9606 GN=MT-ND2 PE=1 SV=2	MT-ND2	347	NU2M_HUMAN		1	0.999	2	2
Q9H4B7	Q9H4B7 TBB1_HUMAN Tubulin beta-1 chain OS=Homo sapiens OX=9606 GN=TUBB1 PE=1 SV=1	TUBB1	451	TBB1_HUMAN		1	0.999	18	1
Q96QA5	Q96QA5 GSDMA_HUMAN Gasdermin-A OS=Homo sapiens OX=9606 GN=GSDMA PE=1 SV=4	GSDMA	445	GSDMA_HUMAN		1	0.999	9	1
Q7Z3Y8	Q7Z3Y8 K1C27_HUMAN Keratin, type I cytoskeletal 27 OS=Homo sapiens OX=9606 GN=KRT27 PE=1 SV=2	KRT27	459	K1C27_HUMAN		1	0.999	17	1
P31146	P31146 COR1A_HUMAN Coronin-1A OS=Homo sapiens OX=9606 GN=CORO1A PE=1 SV=4	CORO1A	461	COR1A_HUMAN		1	0.999	6	1
Q9Y5X1	Q9Y5X1 SNX9_HUMAN Sorting nexin-9 OS=Homo sapiens OX=9606 GN=SNX9 PE=1 SV=1	SNX9	595	SNX9_HUMAN		1	0.999	11	1
A8MWD9	A8MWD9 RUXGL_HUMAN Putative small nuclear ribonucleoprotein G-like protein 15 OS=Homo sapiens OX=9606 GN=SNRPGP15 PE=5 SV=2	SNRPGP15	76	RUXGL_HUMAN	P62308	1	0.999	4	1
P22735	P22735 TGM1_HUMAN Protein-glutamine gamma-glutamyltransferase K OS=Homo sapiens OX=9606 GN=TGM1 PE=1 SV=4	TGM1	817	TGM1_HUMAN		1	0.999	10	1
Q12768	Q12768 WASC5_HUMAN WASH complex subunit 5 OS=Homo sapiens OX=9606 GN=WASHC5 PE=1 SV=1	WASHC5	1159	WASC5_HUMAN		1	0.999	7	1
Q13823	Q13823 NOG2_HUMAN Nucleolar GTP-binding protein 2 OS=Homo sapiens OX=9606 GN=GNL2 PE=1 SV=1	GNL2	731	NOG2_HUMAN		1	0.999	9	1
Q9UHD2	Q9UHD2 TBK1_HUMAN Serine/threonine-protein kinase TBK1 OS=Homo sapiens OX=9606 GN=TBK1 PE=1 SV=1	TBK1	729	TBK1_HUMAN		1	0.999	6	1
Q14012	Q14012 KCC1A_HUMAN Calcium/calmodulin-dependent protein kinase type 1 OS=Homo sapiens OX=9606 GN=CAMK1 PE=1 SV=1	CAMK1	370	KCC1A_HUMAN		1	0.999	2	1
O60831	O60831 PRAF2_HUMAN PRA1 family protein 2 OS=Homo sapiens OX=9606 GN=PRAF2 PE=1 SV=1	PRAF2	178	PRAF2_HUMAN		1	0.999	3	1
P29083	P29083 T2EA_HUMAN General transcription factor IIE subunit 1 OS=Homo sapiens OX=9606 GN=GTF2E1 PE=1 SV=2	GTF2E1	439	T2EA_HUMAN		1	0.999	4	1
P42574	P42574 CASP3_HUMAN Caspase-3 OS=Homo sapiens OX=9606 GN=CASP3 PE=1 SV=2	CASP3	277	CASP3_HUMAN		1	0.999	4	1
O60645	O60645 EXOC3_HUMAN Exocyst complex component 3 OS=Homo sapiens OX=9606 GN=EXOC3 PE=1 SV=3	EXOC3	745	EXOC3_HUMAN		1	0.999	4	1
Q5T653	Q5T653 RM02_HUMAN 39S ribosomal protein L2, mitochondrial OS=Homo sapiens OX=9606 GN=MRPL2 PE=1 SV=2	MRPL2	305	RM02_HUMAN		1	0.999	4	1
Q32P41	Q32P41 TRM5_HUMAN tRNA (guanine(37)-N1)-methyltransferase OS=Homo sapiens OX=9606 GN=TRMT5 PE=1 SV=2	TRMT5	509	TRM5_HUMAN		1	0.999	7	1
Q6P3W7	Q6P3W7 SCYL2_HUMAN SCY1-like protein 2 OS=Homo sapiens OX=9606 GN=SCYL2 PE=1 SV=1	SCYL2	929	SCYL2_HUMAN		1	0.999	5	1
Q9NQR4	Q9NQR4 NIT2_HUMAN Omega-amidase NIT2 OS=Homo sapiens OX=9606 GN=NIT2 PE=1 SV=1	NIT2	276	NIT2_HUMAN		1	0.999	4	1
Q9UKL0	Q9UKL0 RCOR1_HUMAN REST corepressor 1 OS=Homo sapiens OX=9606 GN=RCOR1 PE=1 SV=2	RCOR1	485	RCOR1_HUMAN		0.9991	0.999	3	1
Q9Y324	Q9Y324 FCF1_HUMAN rRNA-processing protein FCF1 homolog OS=Homo sapiens OX=9606 GN=FCF1 PE=2 SV=1	FCF1	198	FCF1_HUMAN		1	0.999	5	1
Q9Y5X2	Q9Y5X2 SNX8_HUMAN Sorting nexin-8 OS=Homo sapiens OX=9606 GN=SNX8 PE=1 SV=1	SNX8	465	SNX8_HUMAN		1	0.999	5	1
Q13485	Q13485 SMAD4_HUMAN Mothers against decapentaplegic homolog 4 OS=Homo sapiens OX=9606 GN=SMAD4 PE=1 SV=1	SMAD4	552	SMAD4_HUMAN		1	0.999	3	1
Q99661	Q99661 KIF2C_HUMAN Kinesin-like protein KIF2C OS=Homo sapiens OX=9606 GN=KIF2C PE=1 SV=2	KIF2C	725	KIF2C_HUMAN		1	0.999	5	1
Q9NRK6	Q9NRK6 ABCBA_HUMAN ATP-binding cassette sub-family B member 10, mitochondrial OS=Homo sapiens OX=9606 GN=ABCB10 PE=1 SV=2	ABCB10	738	ABCBA_HUMAN		0.9961	0.999	3	1
O00418	O00418 EF2K_HUMAN Eukaryotic elongation factor 2 kinase OS=Homo sapiens OX=9606 GN=EEF2K PE=1 SV=2	EEF2K	725	EF2K_HUMAN		1	0.999	4	1
P10398	P10398 ARAF_HUMAN Serine/threonine-protein kinase A-Raf OS=Homo sapiens OX=9606 GN=ARAF PE=1 SV=2	ARAF	606	ARAF_HUMAN		1	0.999	5	1
Q15018	Q15018 ABRX2_HUMAN BRISC complex subunit Abraxas 2 OS=Homo sapiens OX=9606 GN=ABRAXAS2 PE=1 SV=2	ABRAXAS2	415	ABRX2_HUMAN		1	0.999	3	1
Q9BVV7	Q9BVV7 TIM21_HUMAN Mitochondrial import inner membrane translocase subunit Tim21 OS=Homo sapiens OX=9606 GN=TIMM21 PE=1 SV=1	TIMM21	248	TIM21_HUMAN		1	0.999	3	1
P82664	P82664 RT10_HUMAN 28S ribosomal protein S10, mitochondrial OS=Homo sapiens OX=9606 GN=MRPS10 PE=1 SV=2	MRPS10	201	RT10_HUMAN		0.9996	0.999	2	1
P53701	P53701 CCHL_HUMAN Cytochrome c-type heme lyase OS=Homo sapiens OX=9606 GN=HCCS PE=1 SV=1	HCCS	268	CCHL_HUMAN		0.7918	0.9965	1	1
Q92791	Q92791 SC65_HUMAN Endoplasmic reticulum protein SC65 OS=Homo sapiens OX=9606 GN=P3H4 PE=1 SV=1	P3H4	437	SC65_HUMAN		1	0.999	3	1
Q96AA3	Q96AA3 RFT1_HUMAN Protein RFT1 homolog OS=Homo sapiens OX=9606 GN=RFT1 PE=1 SV=1	RFT1	541	RFT1_HUMAN		0.9973	0.999	2	1
Q13510	Q13510 ASAH1_HUMAN Acid ceramidase OS=Homo sapiens OX=9606 GN=ASAH1 PE=1 SV=5	ASAH1	395	ASAH1_HUMAN	Q13510-2	1	0.999	3	1
Q15572	Q15572 TAF1C_HUMAN TATA box-binding protein-associated factor RNA polymerase I subunit C OS=Homo sapiens OX=9606 GN=TAF1C PE=1 SV=2	TAF1C	869	TAF1C_HUMAN	Q15572-2, Q15572-6	1	0.999	3	1
Q9H4M9	Q9H4M9 EHD1_HUMAN EH domain-containing protein 1 OS=Homo sapiens OX=9606 GN=EHD1 PE=1 SV=2	EHD1	534	EHD1_HUMAN		1	0.999	23	18
Q14254	Q14254 FLOT2_HUMAN Flotillin-2 OS=Homo sapiens OX=9606 GN=FLOT2 PE=1 SV=2	FLOT2	428	FLOT2_HUMAN		1	0.999	16	18
P39019	P39019 RS19_HUMAN 40S ribosomal protein S19 OS=Homo sapiens OX=9606 GN=RPS19 PE=1 SV=2	RPS19	145	RS19_HUMAN		1	0.999	11	16
P21281	P21281 VATB2_HUMAN V-type proton ATPase subunit B, brain isoform OS=Homo sapiens OX=9606 GN=ATP6V1B2 PE=1 SV=3	ATP6V1B2	511	VATB2_HUMAN		1	0.999	17	16
O15355	O15355 PPM1G_HUMAN Protein phosphatase 1G OS=Homo sapiens OX=9606 GN=PPM1G PE=1 SV=1	PPM1G	546	PPM1G_HUMAN		1	0.999	14	16
Q9H078-2	Q9H078-2 CLPB_HUMAN Isoform 2 of Caseinolytic peptidase B protein homolog OS=Homo sapiens OX=9606 GN=CLPB	CLPB	677	CLPB_HUMAN		1	0.999	14	16
O95336	O95336 6PGL_HUMAN 6-phosphogluconolactonase OS=Homo sapiens OX=9606 GN=PGLS PE=1 SV=2	PGLS	258	6PGL_HUMAN		1	0.999	13	15
P53999	P53999 TCP4_HUMAN Activated RNA polymerase II transcriptional coactivator p15 OS=Homo sapiens OX=9606 GN=SUB1 PE=1 SV=3	SUB1	127	TCP4_HUMAN		1	0.999	9	15
Q00688	Q00688 FKBP3_HUMAN Peptidyl-prolyl cis-trans isomerase FKBP3 OS=Homo sapiens OX=9606 GN=FKBP3 PE=1 SV=1	FKBP3	224	FKBP3_HUMAN		1	0.999	10	15
Q96C19	Q96C19 EFHD2_HUMAN EF-hand domain-containing protein D2 OS=Homo sapiens OX=9606 GN=EFHD2 PE=1 SV=1	EFHD2	240	EFHD2_HUMAN		1	0.999	13	15
Q15293	Q15293 RCN1_HUMAN Reticulocalbin-1 OS=Homo sapiens OX=9606 GN=RCN1 PE=1 SV=1	RCN1	331	RCN1_HUMAN		1	0.999	9	14
P30533	P30533 AMRP_HUMAN Alpha-2-macroglobulin receptor-associated protein OS=Homo sapiens OX=9606 GN=LRPAP1 PE=1 SV=1	LRPAP1	357	AMRP_HUMAN		1	0.999	10	13
P62857	P62857 RS28_HUMAN 40S ribosomal protein S28 OS=Homo sapiens OX=9606 GN=RPS28 PE=1 SV=1	RPS28	69	RS28_HUMAN		1	0.999	3	12
Q15428	Q15428 SF3A2_HUMAN Splicing factor 3A subunit 2 OS=Homo sapiens OX=9606 GN=SF3A2 PE=1 SV=2	SF3A2	464	SF3A2_HUMAN		1	0.999	5	12
P49902	P49902 5NTC_HUMAN Cytosolic purine 5'-nucleotidase OS=Homo sapiens OX=9606 GN=NT5C2 PE=1 SV=1	NT5C2	561	5NTC_HUMAN	P49902-2	1	0.999	7	12
Q8N1G4	Q8N1G4 LRC47_HUMAN Leucine-rich repeat-containing protein 47 OS=Homo sapiens OX=9606 GN=LRRC47 PE=1 SV=1	LRRC47	583	LRC47_HUMAN		1	0.999	14	11
Q14011	Q14011 CIRBP_HUMAN Cold-inducible RNA-binding protein OS=Homo sapiens OX=9606 GN=CIRBP PE=1 SV=1	CIRBP	172	CIRBP_HUMAN		1	0.999	4	11
Q99598	Q99598 TSNAX_HUMAN Translin-associated protein X OS=Homo sapiens OX=9606 GN=TSNAX PE=1 SV=1	TSNAX	290	TSNAX_HUMAN		1	0.999	6	10
Q9HD45	Q9HD45 TM9S3_HUMAN Transmembrane 9 superfamily member 3 OS=Homo sapiens OX=9606 GN=TM9SF3 PE=1 SV=2	TM9SF3	589	TM9S3_HUMAN		1	0.999	7	10
Q9UKS6	Q9UKS6 PACN3_HUMAN Protein kinase C and casein kinase substrate in neurons protein 3 OS=Homo sapiens OX=9606 GN=PACSIN3 PE=1 SV=2	PACSIN3	424	PACN3_HUMAN		1	0.999	9	9
P51116	P51116 FXR2_HUMAN Fragile X mental retardation syndrome-related protein 2 OS=Homo sapiens OX=9606 GN=FXR2 PE=1 SV=2	FXR2	673	FXR2_HUMAN		1	0.999	9	9
Q9NTZ6	Q9NTZ6 RBM12_HUMAN RNA-binding protein 12 OS=Homo sapiens OX=9606 GN=RBM12 PE=1 SV=1	RBM12	932	RBM12_HUMAN		1	0.999	12	8
P78330	P78330 SERB_HUMAN Phosphoserine phosphatase OS=Homo sapiens OX=9606 GN=PSPH PE=1 SV=2	PSPH	225	SERB_HUMAN		1	0.999	8	8
O75531	O75531 BAF_HUMAN Barrier-to-autointegration factor OS=Homo sapiens OX=9606 GN=BANF1 PE=1 SV=1	BANF1	89	BAF_HUMAN		1	0.999	4	8
P11166	P11166 GTR1_HUMAN Solute carrier family 2, facilitated glucose transporter member 1 OS=Homo sapiens OX=9606 GN=SLC2A1 PE=1 SV=2	SLC2A1	492	GTR1_HUMAN		1	0.999	7	8
P31483	P31483 TIA1_HUMAN Nucleolysin TIA-1 isoform p40 OS=Homo sapiens OX=9606 GN=TIA1 PE=1 SV=3	TIA1	386	TIA1_HUMAN		1	0.999	6	8
O75600	O75600 KBL_HUMAN 2-amino-3-ketobutyrate coenzyme A ligase, mitochondrial OS=Homo sapiens OX=9606 GN=GCAT PE=1 SV=1	GCAT	419	KBL_HUMAN	O75600-2	1	0.999	5	8
O75934	O75934 SPF27_HUMAN Pre-mRNA-splicing factor SPF27 OS=Homo sapiens OX=9606 GN=BCAS2 PE=1 SV=1	BCAS2	225	SPF27_HUMAN		1	0.999	7	7
P51970	P51970 NDUA8_HUMAN NADH dehydrogenase [ubiquinone] 1 alpha subcomplex subunit 8 OS=Homo sapiens OX=9606 GN=NDUFA8 PE=1 SV=3	NDUFA8	172	NDUA8_HUMAN		1	0.999	5	7
Q9NP79	Q9NP79 VTA1_HUMAN Vacuolar protein sorting-associated protein VTA1 homolog OS=Homo sapiens OX=9606 GN=VTA1 PE=1 SV=1	VTA1	307	VTA1_HUMAN		1	0.999	6	7
O00560	O00560 SDCB1_HUMAN Syntenin-1 OS=Homo sapiens OX=9606 GN=SDCBP PE=1 SV=1	SDCBP	298	SDCB1_HUMAN	O00560-3	1	0.999	5	7
Q14353	Q14353 GAMT_HUMAN Guanidinoacetate N-methyltransferase OS=Homo sapiens OX=9606 GN=GAMT PE=1 SV=1	GAMT	236	GAMT_HUMAN		1	0.999	6	7
O43790	O43790 KRT86_HUMAN Keratin, type II cuticular Hb6 OS=Homo sapiens OX=9606 GN=KRT86 PE=1 SV=1	KRT86	486	KRT86_HUMAN		1	0.999	15	6
Q15121	Q15121 PEA15_HUMAN Astrocytic phosphoprotein PEA-15 OS=Homo sapiens OX=9606 GN=PEA15 PE=1 SV=2	PEA15	130	PEA15_HUMAN	Q15121-2	1	0.999	5	6
P55010	P55010 IF5_HUMAN Eukaryotic translation initiation factor 5 OS=Homo sapiens OX=9606 GN=EIF5 PE=1 SV=2	EIF5	431	IF5_HUMAN		1	0.999	10	6
Q9Y315	Q9Y315 DEOC_HUMAN Deoxyribose-phosphate aldolase OS=Homo sapiens OX=9606 GN=DERA PE=1 SV=2	DERA	318	DEOC_HUMAN		1	0.999	8	6
Q9BSH4	Q9BSH4 TACO1_HUMAN Translational activator of cytochrome c oxidase 1 OS=Homo sapiens OX=9606 GN=TACO1 PE=1 SV=1	TACO1	297	TACO1_HUMAN		1	0.999	4	6
Q9Y6J9	Q9Y6J9 TAF6L_HUMAN TAF6-like RNA polymerase II p300/CBP-associated factor-associated factor 65 kDa subunit 6L OS=Homo sapiens OX=9606 GN=TAF6L PE=1 SV=1	TAF6L	622	TAF6L_HUMAN		1	0.999	7	6
Q08752	Q08752 PPID_HUMAN Peptidyl-prolyl cis-trans isomerase D OS=Homo sapiens OX=9606 GN=PPID PE=1 SV=3	PPID	370	PPID_HUMAN		1	0.999	8	6
Q14145	Q14145 KEAP1_HUMAN Kelch-like ECH-associated protein 1 OS=Homo sapiens OX=9606 GN=KEAP1 PE=1 SV=2	KEAP1	624	KEAP1_HUMAN		1	0.999	9	6
P07951-2	P07951-2 TPM2_HUMAN Isoform 2 of Tropomyosin beta chain OS=Homo sapiens OX=9606 GN=TPM2	TPM2	284	TPM2_HUMAN		1	0.999	17	5
Q9BS26	Q9BS26 ERP44_HUMAN Endoplasmic reticulum resident protein 44 OS=Homo sapiens OX=9606 GN=ERP44 PE=1 SV=1	ERP44	406	ERP44_HUMAN		1	0.999	12	5
Q9NRV9	Q9NRV9 HEBP1_HUMAN Heme-binding protein 1 OS=Homo sapiens OX=9606 GN=HEBP1 PE=1 SV=1	HEBP1	189	HEBP1_HUMAN		1	0.999	7	5
P41567	P41567 EIF1_HUMAN Eukaryotic translation initiation factor 1 OS=Homo sapiens OX=9606 GN=EIF1 PE=1 SV=1	EIF1	113	EIF1_HUMAN		1	0.999	6	5
P61081	P61081 UBC12_HUMAN NEDD8-conjugating enzyme Ubc12 OS=Homo sapiens OX=9606 GN=UBE2M PE=1 SV=1	UBE2M	183	UBC12_HUMAN		1	0.999	7	5
Q9NS86	Q9NS86 LANC2_HUMAN LanC-like protein 2 OS=Homo sapiens OX=9606 GN=LANCL2 PE=1 SV=1	LANCL2	450	LANC2_HUMAN		1	0.999	8	5
Q96C86	Q96C86 DCPS_HUMAN m7GpppX diphosphatase OS=Homo sapiens OX=9606 GN=DCPS PE=1 SV=2	DCPS	337	DCPS_HUMAN		1	0.999	7	5
Q9Y2W1	Q9Y2W1 TR150_HUMAN Thyroid hormone receptor-associated protein 3 OS=Homo sapiens OX=9606 GN=THRAP3 PE=1 SV=2	THRAP3	955	TR150_HUMAN		1	0.999	7	5
Q13526	Q13526 PIN1_HUMAN Peptidyl-prolyl cis-trans isomerase NIMA-interacting 1 OS=Homo sapiens OX=9606 GN=PIN1 PE=1 SV=1	PIN1	163	PIN1_HUMAN		1	0.999	3	5
P48509	P48509 CD151_HUMAN CD151 antigen OS=Homo sapiens OX=9606 GN=CD151 PE=1 SV=3	CD151	253	CD151_HUMAN		1	0.999	2	5
Q9UBB6	Q9UBB6 NCDN_HUMAN Neurochondrin OS=Homo sapiens OX=9606 GN=NCDN PE=1 SV=1	NCDN	729	NCDN_HUMAN	Q9UBB6-2, Q9UBB6-3	1	0.999	5	5
P23786	P23786 CPT2_HUMAN Carnitine O-palmitoyltransferase 2, mitochondrial OS=Homo sapiens OX=9606 GN=CPT2 PE=1 SV=2	CPT2	658	CPT2_HUMAN		1	0.999	12	4
P19404	P19404 NDUV2_HUMAN NADH dehydrogenase [ubiquinone] flavoprotein 2, mitochondrial OS=Homo sapiens OX=9606 GN=NDUFV2 PE=1 SV=2	NDUFV2	249	NDUV2_HUMAN		1	0.999	6	4
Q9BWM7	Q9BWM7 SFXN3_HUMAN Sideroflexin-3 OS=Homo sapiens OX=9606 GN=SFXN3 PE=1 SV=3	SFXN3	321	SFXN3_HUMAN		1	0.999	10	4
P18031	P18031 PTN1_HUMAN Tyrosine-protein phosphatase non-receptor type 1 OS=Homo sapiens OX=9606 GN=PTPN1 PE=1 SV=1	PTPN1	435	PTN1_HUMAN		1	0.999	11	4
Q9Y2V2	Q9Y2V2 CHSP1_HUMAN Calcium-regulated heat-stable protein 1 OS=Homo sapiens OX=9606 GN=CARHSP1 PE=1 SV=2	CARHSP1	147	CHSP1_HUMAN		1	0.999	3	4
Q9BU89	Q9BU89 DOHH_HUMAN Deoxyhypusine hydroxylase OS=Homo sapiens OX=9606 GN=DOHH PE=1 SV=1	DOHH	302	DOHH_HUMAN		1	0.999	5	4
Q9H993	Q9H993 ARMT1_HUMAN Protein-glutamate O-methyltransferase OS=Homo sapiens OX=9606 GN=ARMT1 PE=1 SV=1	ARMT1	441	ARMT1_HUMAN		1	0.999	4	4
P06132	P06132 DCUP_HUMAN Uroporphyrinogen decarboxylase OS=Homo sapiens OX=9606 GN=UROD PE=1 SV=2	UROD	367	DCUP_HUMAN		1	0.999	6	4
Q9UBW8	Q9UBW8 CSN7A_HUMAN COP9 signalosome complex subunit 7a OS=Homo sapiens OX=9606 GN=COPS7A PE=1 SV=1	COPS7A	275	CSN7A_HUMAN		1	0.999	6	4
Q9BV44	Q9BV44 THUM3_HUMAN THUMP domain-containing protein 3 OS=Homo sapiens OX=9606 GN=THUMPD3 PE=1 SV=1	THUMPD3	507	THUM3_HUMAN		1	0.999	5	4
Q53H82	Q53H82 LACB2_HUMAN Endoribonuclease LACTB2 OS=Homo sapiens OX=9606 GN=LACTB2 PE=1 SV=2	LACTB2	288	LACB2_HUMAN		1	0.999	6	4
Q8IWB7	Q8IWB7 WDFY1_HUMAN WD repeat and FYVE domain-containing protein 1 OS=Homo sapiens OX=9606 GN=WDFY1 PE=1 SV=1	WDFY1	410	WDFY1_HUMAN		1	0.999	6	4
Q9H9H4	Q9H9H4 VP37B_HUMAN Vacuolar protein sorting-associated protein 37B OS=Homo sapiens OX=9606 GN=VPS37B PE=1 SV=1	VPS37B	285	VP37B_HUMAN		1	0.999	4	4
Q9NP58	Q9NP58 ABCB6_HUMAN ATP-binding cassette sub-family B member 6, mitochondrial OS=Homo sapiens OX=9606 GN=ABCB6 PE=1 SV=1	ABCB6	842	ABCB6_HUMAN	Q9NP58-4	1	0.999	3	4
Q9UNH7	Q9UNH7 SNX6_HUMAN Sorting nexin-6 OS=Homo sapiens OX=9606 GN=SNX6 PE=1 SV=1	SNX6	406	SNX6_HUMAN		1	0.999	4	4
P10412	P10412 H14_HUMAN Histone H1.4 OS=Homo sapiens OX=9606 GN=HIST1H1E PE=1 SV=2	HIST1H1E	219	H14_HUMAN		1	0.999	15	3
P00918	P00918 CAH2_HUMAN Carbonic anhydrase 2 OS=Homo sapiens OX=9606 GN=CA2 PE=1 SV=2	CA2	260	CAH2_HUMAN		1	0.999	7	3
Q3ZCW2	Q3ZCW2 LEGL_HUMAN Galectin-related protein OS=Homo sapiens OX=9606 GN=LGALSL PE=1 SV=2	LGALSL	172	LEGL_HUMAN		1	0.999	5	3
O14949	O14949 QCR8_HUMAN Cytochrome b-c1 complex subunit 8 OS=Homo sapiens OX=9606 GN=UQCRQ PE=1 SV=4	UQCRQ	82	QCR8_HUMAN		1	0.999	4	3
P53602	P53602 MVD1_HUMAN Diphosphomevalonate decarboxylase OS=Homo sapiens OX=9606 GN=MVD PE=1 SV=1	MVD	400	MVD1_HUMAN		1	0.999	10	3
Q9BRJ6	Q9BRJ6 CG050_HUMAN Uncharacterized protein C7orf50 OS=Homo sapiens OX=9606 GN=C7orf50 PE=1 SV=1	C7orf50	194	CG050_HUMAN		1	0.999	5	3
P53041	P53041 PPP5_HUMAN Serine/threonine-protein phosphatase 5 OS=Homo sapiens OX=9606 GN=PPP5C PE=1 SV=1	PPP5C	499	PPP5_HUMAN		1	0.999	8	3
Q6P1L8	Q6P1L8 RM14_HUMAN 39S ribosomal protein L14, mitochondrial OS=Homo sapiens OX=9606 GN=MRPL14 PE=1 SV=1	MRPL14	145	RM14_HUMAN		1	0.999	2	3
Q9Y376	Q9Y376 CAB39_HUMAN Calcium-binding protein 39 OS=Homo sapiens OX=9606 GN=CAB39 PE=1 SV=1	CAB39	341	CAB39_HUMAN		1	0.999	8	3
Q01629	Q01629 IFM2_HUMAN Interferon-induced transmembrane protein 2 OS=Homo sapiens OX=9606 GN=IFITM2 PE=1 SV=2	IFITM2	132	IFM2_HUMAN		1	0.999	2	3
Q9BUI4	Q9BUI4 RPC3_HUMAN DNA-directed RNA polymerase III subunit RPC3 OS=Homo sapiens OX=9606 GN=POLR3C PE=1 SV=1	POLR3C	534	RPC3_HUMAN		1	0.999	4	3
P50148	P50148 GNAQ_HUMAN Guanine nucleotide-binding protein G(q) subunit alpha OS=Homo sapiens OX=9606 GN=GNAQ PE=1 SV=4	GNAQ	359	GNAQ_HUMAN		1	0.999	6	3
A6NDG6	A6NDG6 PGP_HUMAN Glycerol-3-phosphate phosphatase OS=Homo sapiens OX=9606 GN=PGP PE=1 SV=1	PGP	321	PGP_HUMAN		1	0.999	5	3
O95563	O95563 MPC2_HUMAN Mitochondrial pyruvate carrier 2 OS=Homo sapiens OX=9606 GN=MPC2 PE=1 SV=1	MPC2	127	MPC2_HUMAN		1	0.999	4	3
Q13445	Q13445 TMED1_HUMAN Transmembrane emp24 domain-containing protein 1 OS=Homo sapiens OX=9606 GN=TMED1 PE=1 SV=1	TMED1	227	TMED1_HUMAN		1	0.999	3	3
Q8IYI6	Q8IYI6 EXOC8_HUMAN Exocyst complex component 8 OS=Homo sapiens OX=9606 GN=EXOC8 PE=1 SV=2	EXOC8	725	EXOC8_HUMAN		1	0.999	8	3
Q9Y6E0-2	Q9Y6E0-2 STK24_HUMAN Isoform A of Serine/threonine-protein kinase 24 OS=Homo sapiens OX=9606 GN=STK24	STK24	431	STK24_HUMAN		1	0.999	4	3
Q02127	Q02127 PYRD_HUMAN Dihydroorotate dehydrogenase (quinone), mitochondrial OS=Homo sapiens OX=9606 GN=DHODH PE=1 SV=3	DHODH	395	PYRD_HUMAN		1	0.999	5	3
Q92530	Q92530 PSMF1_HUMAN Proteasome inhibitor PI31 subunit OS=Homo sapiens OX=9606 GN=PSMF1 PE=1 SV=2	PSMF1	271	PSMF1_HUMAN		1	0.999	2	3
Q9Y3B2	Q9Y3B2 EXOS1_HUMAN Exosome complex component CSL4 OS=Homo sapiens OX=9606 GN=EXOSC1 PE=1 SV=1	EXOSC1	195	EXOS1_HUMAN		1	0.999	4	3
Q01650	Q01650 LAT1_HUMAN Large neutral amino acids transporter small subunit 1 OS=Homo sapiens OX=9606 GN=SLC7A5 PE=1 SV=2	SLC7A5	507	LAT1_HUMAN		1	0.999	4	3
Q71UM5	Q71UM5 RS27L_HUMAN 40S ribosomal protein S27-like OS=Homo sapiens OX=9606 GN=RPS27L PE=1 SV=3	RPS27L	84	RS27L_HUMAN		1	0.999	6	3
Q9H9A6	Q9H9A6 LRC40_HUMAN Leucine-rich repeat-containing protein 40 OS=Homo sapiens OX=9606 GN=LRRC40 PE=1 SV=1	LRRC40	602	LRC40_HUMAN		1	0.999	4	3
O94903	O94903 PLPHP_HUMAN Pyridoxal phosphate homeostasis protein OS=Homo sapiens OX=9606 GN=PLPBP PE=1 SV=1	PLPBP	275	PLPHP_HUMAN		1	0.999	3	3
Q96B26	Q96B26 EXOS8_HUMAN Exosome complex component RRP43 OS=Homo sapiens OX=9606 GN=EXOSC8 PE=1 SV=1	EXOSC8	276	EXOS8_HUMAN		1	0.999	6	3
Q13123	Q13123 RED_HUMAN Protein Red OS=Homo sapiens OX=9606 GN=IK PE=1 SV=3	IK	557	RED_HUMAN		1	0.999	4	3
Q8NBU5	Q8NBU5 ATAD1_HUMAN ATPase family AAA domain-containing protein 1 OS=Homo sapiens OX=9606 GN=ATAD1 PE=1 SV=1	ATAD1	361	ATAD1_HUMAN		1	0.999	7	3
Q9H2D1	Q9H2D1 MFTC_HUMAN Mitochondrial folate transporter/carrier OS=Homo sapiens OX=9606 GN=SLC25A32 PE=1 SV=2	SLC25A32	315	MFTC_HUMAN		1	0.999	2	3
P60520	P60520 GBRL2_HUMAN Gamma-aminobutyric acid receptor-associated protein-like 2 OS=Homo sapiens OX=9606 GN=GABARAPL2 PE=1 SV=1	GABARAPL2	117	GBRL2_HUMAN		1	0.999	3	3
Q99442	Q99442 SEC62_HUMAN Translocation protein SEC62 OS=Homo sapiens OX=9606 GN=SEC62 PE=1 SV=1	SEC62	399	SEC62_HUMAN		1	0.999	4	3
Q3KQV9	Q3KQV9 UAP1L_HUMAN UDP-N-acetylhexosamine pyrophosphorylase-like protein 1 OS=Homo sapiens OX=9606 GN=UAP1L1 PE=1 SV=2	UAP1L1	507	UAP1L_HUMAN		1	0.999	3	3
P17900	P17900 SAP3_HUMAN Ganglioside GM2 activator OS=Homo sapiens OX=9606 GN=GM2A PE=1 SV=4	GM2A	193	SAP3_HUMAN		1	0.999	5	2
P09471-2	P09471-2 GNAO_HUMAN Isoform Alpha-2 of Guanine nucleotide-binding protein G(o) subunit alpha OS=Homo sapiens OX=9606 GN=GNAO1	GNAO1	354	GNAO_HUMAN		1	0.999	8	2
P57737-3	P57737-3 CORO7_HUMAN Isoform 3 of Coronin-7 OS=Homo sapiens OX=9606 GN=CORO7	CORO7	1048	CORO7_HUMAN		1	0.999	10	2
P61421	P61421 VA0D1_HUMAN V-type proton ATPase subunit d 1 OS=Homo sapiens OX=9606 GN=ATP6V0D1 PE=1 SV=1	ATP6V0D1	351	VA0D1_HUMAN		1	0.999	7	2
Q96KP1	Q96KP1 EXOC2_HUMAN Exocyst complex component 2 OS=Homo sapiens OX=9606 GN=EXOC2 PE=1 SV=1	EXOC2	924	EXOC2_HUMAN		1	0.999	9	2
Q9NSB2	Q9NSB2 KRT84_HUMAN Keratin, type II cuticular Hb4 OS=Homo sapiens OX=9606 GN=KRT84 PE=2 SV=2	KRT84	600	KRT84_HUMAN		1	0.999	17	2
O95870-2	O95870-2 ABHGA_HUMAN Isoform 2 of Protein ABHD16A OS=Homo sapiens OX=9606 GN=ABHD16A	ABHD16A	525	ABHGA_HUMAN		1	0.999	6	2
P37108	P37108 SRP14_HUMAN Signal recognition particle 14 kDa protein OS=Homo sapiens OX=9606 GN=SRP14 PE=1 SV=2	SRP14	136	SRP14_HUMAN		1	0.999	5	2
P61009	P61009 SPCS3_HUMAN Signal peptidase complex subunit 3 OS=Homo sapiens OX=9606 GN=SPCS3 PE=1 SV=1	SPCS3	180	SPCS3_HUMAN		1	0.999	3	2
P20336	P20336 RAB3A_HUMAN Ras-related protein Rab-3A OS=Homo sapiens OX=9606 GN=RAB3A PE=1 SV=1	RAB3A	220	RAB3A_HUMAN		1	0.999	5	2
Q96HU8	Q96HU8 DIRA2_HUMAN GTP-binding protein Di-Ras2 OS=Homo sapiens OX=9606 GN=DIRAS2 PE=1 SV=1	DIRAS2	199	DIRA2_HUMAN		0.9308	0.999	1	2
Q9BVG4	Q9BVG4 PBDC1_HUMAN Protein PBDC1 OS=Homo sapiens OX=9606 GN=PBDC1 PE=1 SV=1	PBDC1	233	PBDC1_HUMAN		1	0.999	7	2
Q86SK9-2	Q86SK9-2 SCD5_HUMAN Isoform 2 of Stearoyl-CoA desaturase 5 OS=Homo sapiens OX=9606 GN=SCD5	SCD5	256	SCD5_HUMAN		1	0.999	5	2
Q9NZW5	Q9NZW5 MPP6_HUMAN MAGUK p55 subfamily member 6 OS=Homo sapiens OX=9606 GN=MPP6 PE=1 SV=2	MPP6	540	MPP6_HUMAN		1	0.999	4	2
Q03426	Q03426 KIME_HUMAN Mevalonate kinase OS=Homo sapiens OX=9606 GN=MVK PE=1 SV=1	MVK	396	KIME_HUMAN		1	0.999	5	2
O43301	O43301 HS12A_HUMAN Heat shock 70 kDa protein 12A OS=Homo sapiens OX=9606 GN=HSPA12A PE=1 SV=2	HSPA12A	675	HS12A_HUMAN		1	0.999	4	2
O60783	O60783 RT14_HUMAN 28S ribosomal protein S14, mitochondrial OS=Homo sapiens OX=9606 GN=MRPS14 PE=1 SV=1	MRPS14	128	RT14_HUMAN		1	0.999	2	2
Q9HB90	Q9HB90 RRAGC_HUMAN Ras-related GTP-binding protein C OS=Homo sapiens OX=9606 GN=RRAGC PE=1 SV=1	RRAGC	399	RRAGC_HUMAN		1	0.999	5	2
Q9NUQ7	Q9NUQ7 UFSP2_HUMAN Ufm1-specific protease 2 OS=Homo sapiens OX=9606 GN=UFSP2 PE=1 SV=3	UFSP2	469	UFSP2_HUMAN		1	0.999	5	2
O75380	O75380 NDUS6_HUMAN NADH dehydrogenase [ubiquinone] iron-sulfur protein 6, mitochondrial OS=Homo sapiens OX=9606 GN=NDUFS6 PE=1 SV=1	NDUFS6	124	NDUS6_HUMAN		1	0.999	4	2
Q14331	Q14331 FRG1_HUMAN Protein FRG1 OS=Homo sapiens OX=9606 GN=FRG1 PE=1 SV=1	FRG1	258	FRG1_HUMAN		1	0.999	3	2
Q9NRX2	Q9NRX2 RM17_HUMAN 39S ribosomal protein L17, mitochondrial OS=Homo sapiens OX=9606 GN=MRPL17 PE=1 SV=1	MRPL17	175	RM17_HUMAN		1	0.999	2	2
P00156	P00156 CYB_HUMAN Cytochrome b OS=Homo sapiens OX=9606 GN=MT-CYB PE=1 SV=2	MT-CYB	380	CYB_HUMAN		1	0.999	2	2
O60826	O60826 CCD22_HUMAN Coiled-coil domain-containing protein 22 OS=Homo sapiens OX=9606 GN=CCDC22 PE=1 SV=1	CCDC22	627	CCD22_HUMAN		1	0.9989	5	2
P03886	P03886 NU1M_HUMAN NADH-ubiquinone oxidoreductase chain 1 OS=Homo sapiens OX=9606 GN=MT-ND1 PE=1 SV=1	MT-ND1	318	NU1M_HUMAN		1	0.999	1	2
Q86YN1	Q86YN1 DOPP1_HUMAN Dolichyldiphosphatase 1 OS=Homo sapiens OX=9606 GN=DOLPP1 PE=2 SV=1	DOLPP1	238	DOPP1_HUMAN		1	0.999	3	2
Q9H9Y4	Q9H9Y4 GPN2_HUMAN GPN-loop GTPase 2 OS=Homo sapiens OX=9606 GN=GPN2 PE=1 SV=2	GPN2	310	GPN2_HUMAN		0.9945	0.999	1	2
O75832	O75832 PSD10_HUMAN 26S proteasome non-ATPase regulatory subunit 10 OS=Homo sapiens OX=9606 GN=PSMD10 PE=1 SV=1	PSMD10	226	PSD10_HUMAN		1	0.999	2	2
Q96A49	Q96A49 SYAP1_HUMAN Synapse-associated protein 1 OS=Homo sapiens OX=9606 GN=SYAP1 PE=1 SV=1	SYAP1	352	SYAP1_HUMAN		1	0.999	3	2
P23743	P23743 DGKA_HUMAN Diacylglycerol kinase alpha OS=Homo sapiens OX=9606 GN=DGKA PE=1 SV=3	DGKA	735	DGKA_HUMAN		1	0.999	3	2
P48507	P48507 GSH0_HUMAN Glutamate--cysteine ligase regulatory subunit OS=Homo sapiens OX=9606 GN=GCLM PE=1 SV=1	GCLM	274	GSH0_HUMAN		1	0.999	3	2
Q9GZP4	Q9GZP4 PITH1_HUMAN PITH domain-containing protein 1 OS=Homo sapiens OX=9606 GN=PITHD1 PE=1 SV=1	PITHD1	211	PITH1_HUMAN		1	0.999	3	2
P0DP23	P0DP23 CALM1_HUMAN Calmodulin-1 OS=Homo sapiens OX=9606 GN=CALM1 PE=1 SV=1	CALM1	149	CALM1_HUMAN	P0DP24, P0DP25	1	0.999	11	1
Q9BTY7	Q9BTY7 HGH1_HUMAN Protein HGH1 homolog OS=Homo sapiens OX=9606 GN=HGH1 PE=1 SV=1	HGH1	390	HGH1_HUMAN		1	0.999	11	1
P62306	P62306 RUXF_HUMAN Small nuclear ribonucleoprotein F OS=Homo sapiens OX=9606 GN=SNRPF PE=1 SV=1	SNRPF	86	RUXF_HUMAN		1	0.999	5	1
P40197	P40197 GPV_HUMAN Platelet glycoprotein V OS=Homo sapiens OX=9606 GN=GP5 PE=1 SV=1	GP5	560	GPV_HUMAN		1	0.999	2	1
O76011	O76011 KRT34_HUMAN Keratin, type I cuticular Ha4 OS=Homo sapiens OX=9606 GN=KRT34 PE=1 SV=2	KRT34	436	KRT34_HUMAN		1	0.999	15	1
P25490	P25490 TYY1_HUMAN Transcriptional repressor protein YY1 OS=Homo sapiens OX=9606 GN=YY1 PE=1 SV=2	YY1	414	TYY1_HUMAN		1	0.999	8	1
O43169	O43169 CYB5B_HUMAN Cytochrome b5 type B OS=Homo sapiens OX=9606 GN=CYB5B PE=1 SV=2	CYB5B	146	CYB5B_HUMAN		1	0.999	4	1
Q8TBQ9	Q8TBQ9 KISHA_HUMAN Protein kish-A OS=Homo sapiens OX=9606 GN=TMEM167A PE=1 SV=1	TMEM167A	72	KISHA_HUMAN		1	0.999	2	1
Q9BRA2	Q9BRA2 TXD17_HUMAN Thioredoxin domain-containing protein 17 OS=Homo sapiens OX=9606 GN=TXNDC17 PE=1 SV=1	TXNDC17	123	TXD17_HUMAN		1	0.999	4	1
Q86W92-2	Q86W92-2 LIPB1_HUMAN Isoform 2 of Liprin-beta-1 OS=Homo sapiens OX=9606 GN=PPFIBP1	PPFIBP1	1005	LIPB1_HUMAN	Q86W92-4	1	0.999	9	1
P82932	P82932 RT06_HUMAN 28S ribosomal protein S6, mitochondrial OS=Homo sapiens OX=9606 GN=MRPS6 PE=1 SV=3	MRPS6	125	RT06_HUMAN		1	0.999	6	1
Q9ULX3	Q9ULX3 NOB1_HUMAN RNA-binding protein NOB1 OS=Homo sapiens OX=9606 GN=NOB1 PE=1 SV=1	NOB1	412	NOB1_HUMAN		1	0.999	5	1
Q5XKP0	Q5XKP0 MIC13_HUMAN MICOS complex subunit MIC13 OS=Homo sapiens OX=9606 GN=MICOS13 PE=1 SV=1	MICOS13	118	MIC13_HUMAN		1	0.999	2	1
O95219	O95219 SNX4_HUMAN Sorting nexin-4 OS=Homo sapiens OX=9606 GN=SNX4 PE=1 SV=1	SNX4	450	SNX4_HUMAN		1	0.999	4	1
P00846	P00846 ATP6_HUMAN ATP synthase subunit a OS=Homo sapiens OX=9606 GN=MT-ATP6 PE=1 SV=1	MT-ATP6	226	ATP6_HUMAN		0.9999	0.999	2	1
Q14197	Q14197 ICT1_HUMAN Peptidyl-tRNA hydrolase ICT1, mitochondrial OS=Homo sapiens OX=9606 GN=MRPL58 PE=1 SV=1	MRPL58	206	ICT1_HUMAN		1	0.999	3	1
Q71RC2-5	Q71RC2-5 LARP4_HUMAN Isoform 5 of La-related protein 4 OS=Homo sapiens OX=9606 GN=LARP4	LARP4	653	LARP4_HUMAN		0.9985	0.999	2	1
Q7L523	Q7L523 RRAGA_HUMAN Ras-related GTP-binding protein A OS=Homo sapiens OX=9606 GN=RRAGA PE=1 SV=1	RRAGA	313	RRAGA_HUMAN		1	0.999	4	1
Q8N5M9	Q8N5M9 JAGN1_HUMAN Protein jagunal homolog 1 OS=Homo sapiens OX=9606 GN=JAGN1 PE=1 SV=1	JAGN1	183	JAGN1_HUMAN		0.9308	0.999	1	1
Q9BTE3-2	Q9BTE3-2 MCMBP_HUMAN Isoform 2 of Mini-chromosome maintenance complex-binding protein OS=Homo sapiens OX=9606 GN=MCMBP	MCMBP	640	MCMBP_HUMAN		1	0.999	6	1
Q9UPN9	Q9UPN9 TRI33_HUMAN E3 ubiquitin-protein ligase TRIM33 OS=Homo sapiens OX=9606 GN=TRIM33 PE=1 SV=3	TRIM33	1127	TRI33_HUMAN		1	0.999	6	1
O43819	O43819 SCO2_HUMAN Protein SCO2 homolog, mitochondrial OS=Homo sapiens OX=9606 GN=SCO2 PE=1 SV=3	SCO2	266	SCO2_HUMAN		1	0.999	5	1
Q13888	Q13888 TF2H2_HUMAN General transcription factor IIH subunit 2 OS=Homo sapiens OX=9606 GN=GTF2H2 PE=1 SV=1	GTF2H2	395	TF2H2_HUMAN	Q6P1K8	1	0.999	5	1
Q6UW63	Q6UW63 PLGT2_HUMAN Protein O-glucosyltransferase 2 OS=Homo sapiens OX=9606 GN=KDELC1 PE=1 SV=1	KDELC1	502	PLGT2_HUMAN		1	0.999	8	1
Q8WY22	Q8WY22 BRI3B_HUMAN BRI3-binding protein OS=Homo sapiens OX=9606 GN=BRI3BP PE=1 SV=1	BRI3BP	251	BRI3B_HUMAN		1	0.999	2	1
Q9C0E2	Q9C0E2 XPO4_HUMAN Exportin-4 OS=Homo sapiens OX=9606 GN=XPO4 PE=1 SV=2	XPO4	1151	XPO4_HUMAN		1	0.999	4	1
P09669	P09669 COX6C_HUMAN Cytochrome c oxidase subunit 6C OS=Homo sapiens OX=9606 GN=COX6C PE=1 SV=2	COX6C	75	COX6C_HUMAN		0.9992	0.999	2	1
Q14691	Q14691 PSF1_HUMAN DNA replication complex GINS protein PSF1 OS=Homo sapiens OX=9606 GN=GINS1 PE=1 SV=1	GINS1	196	PSF1_HUMAN		1	0.999	2	1
Q16762	Q16762 THTR_HUMAN Thiosulfate sulfurtransferase OS=Homo sapiens OX=9606 GN=TST PE=1 SV=4	TST	297	THTR_HUMAN		1	0.999	4	1
Q4G176	Q4G176 ACSF3_HUMAN Acyl-CoA synthetase family member 3, mitochondrial OS=Homo sapiens OX=9606 GN=ACSF3 PE=1 SV=3	ACSF3	576	ACSF3_HUMAN		1	0.999	2	1
Q9BWH2	Q9BWH2 FUND2_HUMAN FUN14 domain-containing protein 2 OS=Homo sapiens OX=9606 GN=FUNDC2 PE=1 SV=2	FUNDC2	189	FUND2_HUMAN		1	0.999	2	1
Q9H6E4	Q9H6E4 CC134_HUMAN Coiled-coil domain-containing protein 134 OS=Homo sapiens OX=9606 GN=CCDC134 PE=1 SV=1	CCDC134	229	CC134_HUMAN		1	0.999	3	1
Q9UHJ6	Q9UHJ6 SHPK_HUMAN Sedoheptulokinase OS=Homo sapiens OX=9606 GN=SHPK PE=1 SV=3	SHPK	478	SHPK_HUMAN		1	0.999	4	1
Q9UKR5	Q9UKR5 ERG28_HUMAN Probable ergosterol biosynthetic protein 28 OS=Homo sapiens OX=9606 GN=ERG28 PE=1 SV=1	ERG28	140	ERG28_HUMAN		1	0.9989	3	1
O00767	O00767 ACOD_HUMAN Acyl-CoA desaturase OS=Homo sapiens OX=9606 GN=SCD PE=1 SV=2	SCD	359	ACOD_HUMAN		0.9989	0.999	2	1
P00395	P00395 COX1_HUMAN Cytochrome c oxidase subunit 1 OS=Homo sapiens OX=9606 GN=MT-CO1 PE=1 SV=1	MT-CO1	513	COX1_HUMAN		0.9999	0.999	2	1
P60763	P60763 RAC3_HUMAN Ras-related C3 botulinum toxin substrate 3 OS=Homo sapiens OX=9606 GN=RAC3 PE=1 SV=1	RAC3	192	RAC3_HUMAN		1	0.999	8	1
Q5HYI8	Q5HYI8 RABL3_HUMAN Rab-like protein 3 OS=Homo sapiens OX=9606 GN=RABL3 PE=1 SV=1	RABL3	236	RABL3_HUMAN		1	0.999	3	1
Q6P1N9	Q6P1N9 TATD1_HUMAN Putative deoxyribonuclease TATDN1 OS=Homo sapiens OX=9606 GN=TATDN1 PE=1 SV=2	TATDN1	297	TATD1_HUMAN		1	0.999	5	1
Q8IU81	Q8IU81 I2BP1_HUMAN Interferon regulatory factor 2-binding protein 1 OS=Homo sapiens OX=9606 GN=IRF2BP1 PE=1 SV=1	IRF2BP1	584	I2BP1_HUMAN		1	0.999	3	1
Q8IUR0	Q8IUR0 TPPC5_HUMAN Trafficking protein particle complex subunit 5 OS=Homo sapiens OX=9606 GN=TRAPPC5 PE=1 SV=1	TRAPPC5	188	TPPC5_HUMAN		1	0.999	3	1
Q92615	Q92615 LAR4B_HUMAN La-related protein 4B OS=Homo sapiens OX=9606 GN=LARP4B PE=1 SV=3	LARP4B	738	LAR4B_HUMAN		0.9801	0.999	2	1
Q9BQE5	Q9BQE5 APOL2_HUMAN Apolipoprotein L2 OS=Homo sapiens OX=9606 GN=APOL2 PE=1 SV=1	APOL2	337	APOL2_HUMAN		1	0.999	3	1
O43181	O43181 NDUS4_HUMAN NADH dehydrogenase [ubiquinone] iron-sulfur protein 4, mitochondrial OS=Homo sapiens OX=9606 GN=NDUFS4 PE=1 SV=1	NDUFS4	175	NDUS4_HUMAN		1	0.999	1	1
P14854	P14854 CX6B1_HUMAN Cytochrome c oxidase subunit 6B1 OS=Homo sapiens OX=9606 GN=COX6B1 PE=1 SV=2	COX6B1	86	CX6B1_HUMAN		0.9308	0.999	1	1
P78386	P78386 KRT85_HUMAN Keratin, type II cuticular Hb5 OS=Homo sapiens OX=9606 GN=KRT85 PE=1 SV=1	KRT85	507	KRT85_HUMAN		1	0.999	9	1
Q86X55	Q86X55 CARM1_HUMAN Histone-arginine methyltransferase CARM1 OS=Homo sapiens OX=9606 GN=CARM1 PE=1 SV=3	CARM1	608	CARM1_HUMAN	Q86X55-1	1	0.999	3	1
Q8WVI0	Q8WVI0 SMIM4_HUMAN Small integral membrane protein 4 OS=Homo sapiens OX=9606 GN=SMIM4 PE=1 SV=2	SMIM4	70	SMIM4_HUMAN		0.9308	0.999	1	1
Q96I25	Q96I25 SPF45_HUMAN Splicing factor 45 OS=Homo sapiens OX=9606 GN=RBM17 PE=1 SV=1	RBM17	401	SPF45_HUMAN		1	0.9989	3	1
Q9BQC6	Q9BQC6 RT63_HUMAN Ribosomal protein 63, mitochondrial OS=Homo sapiens OX=9606 GN=MRPL57 PE=1 SV=1	MRPL57	102	RT63_HUMAN		1	0.999	1	1
Q9BT25	Q9BT25 HAUS8_HUMAN HAUS augmin-like complex subunit 8 OS=Homo sapiens OX=9606 GN=HAUS8 PE=1 SV=3	HAUS8	410	HAUS8_HUMAN	Q9BT25-2, Q9BT25-3	0.9999	0.999	2	1
Q9UBI1	Q9UBI1 COMD3_HUMAN COMM domain-containing protein 3 OS=Homo sapiens OX=9606 GN=COMMD3 PE=1 SV=1	COMMD3	195	COMD3_HUMAN		1	0.999	3	1
Q9Y294	Q9Y294 ASF1A_HUMAN Histone chaperone ASF1A OS=Homo sapiens OX=9606 GN=ASF1A PE=1 SV=1	ASF1A	204	ASF1A_HUMAN		0.999	0.999	2	1
Q14728	Q14728 MFS10_HUMAN Major facilitator superfamily domain-containing protein 10 OS=Homo sapiens OX=9606 GN=MFSD10 PE=1 SV=1	MFSD10	455	MFS10_HUMAN		0.9308	0.999	1	1
Q15334	Q15334 L2GL1_HUMAN Lethal(2) giant larvae protein homolog 1 OS=Homo sapiens OX=9606 GN=LLGL1 PE=1 SV=3	LLGL1	1064	L2GL1_HUMAN		1	0.999	3	1
Q8IVL6	Q8IVL6 P3H3_HUMAN Prolyl 3-hydroxylase 3 OS=Homo sapiens OX=9606 GN=P3H3 PE=1 SV=1	P3H3	736	P3H3_HUMAN		1	0.999	2	1
Q8IVS2	Q8IVS2 FABD_HUMAN Malonyl-CoA-acyl carrier protein transacylase, mitochondrial OS=Homo sapiens OX=9606 GN=MCAT PE=1 SV=2	MCAT	390	FABD_HUMAN		1	0.999	4	1
Q8WUY8	Q8WUY8 NAT14_HUMAN N-acetyltransferase 14 OS=Homo sapiens OX=9606 GN=NAT14 PE=1 SV=1	NAT14	206	NAT14_HUMAN		1	0.999	2	1
Q969U7	Q969U7 PSMG2_HUMAN Proteasome assembly chaperone 2 OS=Homo sapiens OX=9606 GN=PSMG2 PE=1 SV=1	PSMG2	264	PSMG2_HUMAN	Q969U7-2	0.9999	0.999	2	1
Q9BQP7	Q9BQP7 MGME1_HUMAN Mitochondrial genome maintenance exonuclease 1 OS=Homo sapiens OX=9606 GN=MGME1 PE=1 SV=1	MGME1	344	MGME1_HUMAN		1	0.999	3	1
Q9BRG1	Q9BRG1 VPS25_HUMAN Vacuolar protein-sorting-associated protein 25 OS=Homo sapiens OX=9606 GN=VPS25 PE=1 SV=1	VPS25	176	VPS25_HUMAN		1	0.999	2	1
Q9NWM8	Q9NWM8 FKB14_HUMAN Peptidyl-prolyl cis-trans isomerase FKBP14 OS=Homo sapiens OX=9606 GN=FKBP14 PE=1 SV=1	FKBP14	211	FKB14_HUMAN		1	0.999	3	1
Q9UKM7	Q9UKM7 MA1B1_HUMAN Endoplasmic reticulum mannosyl-oligosaccharide 1,2-alpha-mannosidase OS=Homo sapiens OX=9606 GN=MAN1B1 PE=1 SV=2	MAN1B1	699	MA1B1_HUMAN		1	0.999	3	1
O15379	O15379 HDAC3_HUMAN Histone deacetylase 3 OS=Homo sapiens OX=9606 GN=HDAC3 PE=1 SV=2	HDAC3	428	HDAC3_HUMAN	O15379-2	1	0.999	4	1
P04279	P04279 SEMG1_HUMAN Semenogelin-1 OS=Homo sapiens OX=9606 GN=SEMG1 PE=1 SV=2	SEMG1	462	SEMG1_HUMAN		1	0.999	3	1
Q10469	Q10469 MGAT2_HUMAN Alpha-1,6-mannosyl-glycoprotein 2-beta-N-acetylglucosaminyltransferase OS=Homo sapiens OX=9606 GN=MGAT2 PE=1 SV=1	MGAT2	447	MGAT2_HUMAN		1	0.999	3	1
Q14186	Q14186 TFDP1_HUMAN Transcription factor Dp-1 OS=Homo sapiens OX=9606 GN=TFDP1 PE=1 SV=1	TFDP1	410	TFDP1_HUMAN	Q14186-2	1	0.999	2	1
Q53GT1	Q53GT1 KLH22_HUMAN Kelch-like protein 22 OS=Homo sapiens OX=9606 GN=KLHL22 PE=1 SV=2	KLHL22	634	KLH22_HUMAN		1	0.999	3	1
Q6PL18	Q6PL18 ATAD2_HUMAN ATPase family AAA domain-containing protein 2 OS=Homo sapiens OX=9606 GN=ATAD2 PE=1 SV=1	ATAD2	1390	ATAD2_HUMAN		1	0.999	3	1
Q96EK9	Q96EK9 KTI12_HUMAN Protein KTI12 homolog OS=Homo sapiens OX=9606 GN=KTI12 PE=1 SV=1	KTI12	354	KTI12_HUMAN		0.9977	0.999	2	1
O94822	O94822 LTN1_HUMAN E3 ubiquitin-protein ligase listerin OS=Homo sapiens OX=9606 GN=LTN1 PE=1 SV=6	LTN1	1766	LTN1_HUMAN	O94822-3	1	0.9946	2	1
Q53GS7	Q53GS7 GLE1_HUMAN Nucleoporin GLE1 OS=Homo sapiens OX=9606 GN=GLE1 PE=1 SV=2	GLE1	698	GLE1_HUMAN		1	0.9989	2	1
Q86UU1	Q86UU1 PHLB1_HUMAN Pleckstrin homology-like domain family B member 1 OS=Homo sapiens OX=9606 GN=PHLDB1 PE=1 SV=1	PHLDB1	1377	PHLB1_HUMAN	Q86UU1-2	0.9996	0.999	2	1
Q8IY26	Q8IY26 PLPP6_HUMAN Phospholipid phosphatase 6 OS=Homo sapiens OX=9606 GN=PLPP6 PE=1 SV=3	PLPP6	295	PLPP6_HUMAN		0.9999	0.999	2	1
Q96GM8	Q96GM8 TOE1_HUMAN Target of EGR1 protein 1 OS=Homo sapiens OX=9606 GN=TOE1 PE=1 SV=1	TOE1	510	TOE1_HUMAN		1	0.999	2	1
P14618	P14618 KPYM_HUMAN Pyruvate kinase PKM OS=Homo sapiens OX=9606 GN=PKM PE=1 SV=4	PKM	531	KPYM_HUMAN		1	0.999	43	195
P06733	P06733 ENOA_HUMAN Alpha-enolase OS=Homo sapiens OX=9606 GN=ENO1 PE=1 SV=2	ENO1	434	ENOA_HUMAN		1	0.999	25	146
P60842	P60842 IF4A1_HUMAN Eukaryotic initiation factor 4A-I OS=Homo sapiens OX=9606 GN=EIF4A1 PE=1 SV=1	EIF4A1	406	IF4A1_HUMAN		1	0.999	32	107
P40939	P40939 ECHA_HUMAN Trifunctional enzyme subunit alpha, mitochondrial OS=Homo sapiens OX=9606 GN=HADHA PE=1 SV=2	HADHA	763	ECHA_HUMAN		1	0.999	30	101
P62258	P62258 1433E_HUMAN 14-3-3 protein epsilon OS=Homo sapiens OX=9606 GN=YWHAE PE=1 SV=1	YWHAE	255	1433E_HUMAN		1	0.999	23	100
P12956	P12956 XRCC6_HUMAN X-ray repair cross-complementing protein 6 OS=Homo sapiens OX=9606 GN=XRCC6 PE=1 SV=2	XRCC6	609	XRCC6_HUMAN		1	0.999	40	90
Q14974	Q14974 IMB1_HUMAN Importin subunit beta-1 OS=Homo sapiens OX=9606 GN=KPNB1 PE=1 SV=2	KPNB1	876	IMB1_HUMAN		1	0.999	26	89
P29401	P29401 TKT_HUMAN Transketolase OS=Homo sapiens OX=9606 GN=TKT PE=1 SV=3	TKT	623	TKT_HUMAN	P29401-2	1	0.999	26	71
P49915	P49915 GUAA_HUMAN GMP synthase [glutamine-hydrolyzing] OS=Homo sapiens OX=9606 GN=GMPS PE=1 SV=1	GMPS	693	GUAA_HUMAN		1	0.999	28	69
P05023	P05023 AT1A1_HUMAN Sodium/potassium-transporting ATPase subunit alpha-1 OS=Homo sapiens OX=9606 GN=ATP1A1 PE=1 SV=1	ATP1A1	1023	AT1A1_HUMAN	P05023-4	1	0.999	30	62
P55084	P55084 ECHB_HUMAN Trifunctional enzyme subunit beta, mitochondrial OS=Homo sapiens OX=9606 GN=HADHB PE=1 SV=3	HADHB	474	ECHB_HUMAN	P55084-2	1	0.999	22	61
P17844	P17844 DDX5_HUMAN Probable ATP-dependent RNA helicase DDX5 OS=Homo sapiens OX=9606 GN=DDX5 PE=1 SV=1	DDX5	614	DDX5_HUMAN		1	0.999	32	50
P23396	P23396 RS3_HUMAN 40S ribosomal protein S3 OS=Homo sapiens OX=9606 GN=RPS3 PE=1 SV=2	RPS3	243	RS3_HUMAN		1	0.999	23	49
P22234	P22234 PUR6_HUMAN Multifunctional protein ADE2 OS=Homo sapiens OX=9606 GN=PAICS PE=1 SV=3	PAICS	425	PUR6_HUMAN		1	0.999	18	46
Q16555	Q16555 DPYL2_HUMAN Dihydropyrimidinase-related protein 2 OS=Homo sapiens OX=9606 GN=DPYSL2 PE=1 SV=1	DPYSL2	572	DPYL2_HUMAN		1	0.999	26	44
Q86VP6	Q86VP6 CAND1_HUMAN Cullin-associated NEDD8-dissociated protein 1 OS=Homo sapiens OX=9606 GN=CAND1 PE=1 SV=2	CAND1	1230	CAND1_HUMAN		1	0.999	40	42
Q15019	Q15019 SEPT2_HUMAN Septin-2 OS=Homo sapiens OX=9606 GN=SEPT2 PE=1 SV=1	44806	361	SEPT2_HUMAN	Q15019-2, Q15019-3	1	0.999	16	42
P47897	P47897 SYQ_HUMAN Glutamine--tRNA ligase OS=Homo sapiens OX=9606 GN=QARS PE=1 SV=1	QARS	775	SYQ_HUMAN	P47897-2	1	0.999	23	42
P68366	P68366 TBA4A_HUMAN Tubulin alpha-4A chain OS=Homo sapiens OX=9606 GN=TUBA4A PE=1 SV=1	TUBA4A	448	TBA4A_HUMAN	P68366-2	1	0.999	32	40
P0DMV8	P0DMV8 HS71A_HUMAN Heat shock 70 kDa protein 1A OS=Homo sapiens OX=9606 GN=HSPA1A PE=1 SV=1	HSPA1A	641	HS71A_HUMAN	P0DMV9	1	0.999	30	38
O43242	O43242 PSMD3_HUMAN 26S proteasome non-ATPase regulatory subunit 3 OS=Homo sapiens OX=9606 GN=PSMD3 PE=1 SV=2	PSMD3	534	PSMD3_HUMAN		1	0.999	28	38
P40227	P40227 TCPZ_HUMAN T-complex protein 1 subunit zeta OS=Homo sapiens OX=9606 GN=CCT6A PE=1 SV=3	CCT6A	531	TCPZ_HUMAN		1	0.999	19	37
O95864	O95864 FADS2_HUMAN Acyl-CoA 6-desaturase OS=Homo sapiens OX=9606 GN=FADS2 PE=1 SV=1	FADS2	444	FADS2_HUMAN		1	0.999	14	37
Q02978	Q02978 M2OM_HUMAN Mitochondrial 2-oxoglutarate/malate carrier protein OS=Homo sapiens OX=9606 GN=SLC25A11 PE=1 SV=3	SLC25A11	314	M2OM_HUMAN		1	0.999	11	34
P28838	P28838 AMPL_HUMAN Cytosol aminopeptidase OS=Homo sapiens OX=9606 GN=LAP3 PE=1 SV=3	LAP3	519	AMPL_HUMAN	P28838-2	1	0.999	21	34
O75955	O75955 FLOT1_HUMAN Flotillin-1 OS=Homo sapiens OX=9606 GN=FLOT1 PE=1 SV=3	FLOT1	427	FLOT1_HUMAN		1	0.999	18	33
P24752	P24752 THIL_HUMAN Acetyl-CoA acetyltransferase, mitochondrial OS=Homo sapiens OX=9606 GN=ACAT1 PE=1 SV=1	ACAT1	427	THIL_HUMAN		1	0.999	14	32
P22102	P22102 PUR2_HUMAN Trifunctional purine biosynthetic protein adenosine-3 OS=Homo sapiens OX=9606 GN=GART PE=1 SV=1	GART	1010	PUR2_HUMAN		1	0.999	35	31
P40925	P40925 MDHC_HUMAN Malate dehydrogenase, cytoplasmic OS=Homo sapiens OX=9606 GN=MDH1 PE=1 SV=4	MDH1	334	MDHC_HUMAN	P40925-3	1	0.999	12	30
P31689	P31689 DNJA1_HUMAN DnaJ homolog subfamily A member 1 OS=Homo sapiens OX=9606 GN=DNAJA1 PE=1 SV=2	DNAJA1	397	DNJA1_HUMAN		1	0.999	17	30
P68400	P68400 CSK21_HUMAN Casein kinase II subunit alpha OS=Homo sapiens OX=9606 GN=CSNK2A1 PE=1 SV=1	CSNK2A1	391	CSK21_HUMAN		1	0.999	18	29
P55209	P55209 NP1L1_HUMAN Nucleosome assembly protein 1-like 1 OS=Homo sapiens OX=9606 GN=NAP1L1 PE=1 SV=1	NAP1L1	391	NP1L1_HUMAN	P55209-2	1	0.999	9	29
Q13838	Q13838 DX39B_HUMAN Spliceosome RNA helicase DDX39B OS=Homo sapiens OX=9606 GN=DDX39B PE=1 SV=1	DDX39B	428	DX39B_HUMAN	Q13838-2	1	0.999	14	29
P61313	P61313 RL15_HUMAN 60S ribosomal protein L15 OS=Homo sapiens OX=9606 GN=RPL15 PE=1 SV=2	RPL15	204	RL15_HUMAN		1	0.999	15	27
O00232	O00232 PSD12_HUMAN 26S proteasome non-ATPase regulatory subunit 12 OS=Homo sapiens OX=9606 GN=PSMD12 PE=1 SV=3	PSMD12	456	PSD12_HUMAN		1	0.999	23	27
O95433	O95433 AHSA1_HUMAN Activator of 90 kDa heat shock protein ATPase homolog 1 OS=Homo sapiens OX=9606 GN=AHSA1 PE=1 SV=1	AHSA1	338	AHSA1_HUMAN		1	0.999	11	27
P49588	P49588 SYAC_HUMAN Alanine--tRNA ligase, cytoplasmic OS=Homo sapiens OX=9606 GN=AARS PE=1 SV=2	AARS	968	SYAC_HUMAN		1	0.999	22	27
P42167	P42167 LAP2B_HUMAN Lamina-associated polypeptide 2, isoforms beta/gamma OS=Homo sapiens OX=9606 GN=TMPO PE=1 SV=2	TMPO	454	LAP2B_HUMAN		1	0.999	26	27
P00367	P00367 DHE3_HUMAN Glutamate dehydrogenase 1, mitochondrial OS=Homo sapiens OX=9606 GN=GLUD1 PE=1 SV=2	GLUD1	558	DHE3_HUMAN		1	0.999	16	27
P08243	P08243 ASNS_HUMAN Asparagine synthetase [glutamine-hydrolyzing] OS=Homo sapiens OX=9606 GN=ASNS PE=1 SV=4	ASNS	561	ASNS_HUMAN	P08243-2	1	0.999	23	25
P36871	P36871 PGM1_HUMAN Phosphoglucomutase-1 OS=Homo sapiens OX=9606 GN=PGM1 PE=1 SV=3	PGM1	562	PGM1_HUMAN		1	0.999	13	25
P51991	P51991 ROA3_HUMAN Heterogeneous nuclear ribonucleoprotein A3 OS=Homo sapiens OX=9606 GN=HNRNPA3 PE=1 SV=2	HNRNPA3	378	ROA3_HUMAN		1	0.999	22	24
Q9Y6G9	Q9Y6G9 DC1L1_HUMAN Cytoplasmic dynein 1 light intermediate chain 1 OS=Homo sapiens OX=9606 GN=DYNC1LI1 PE=1 SV=3	DYNC1LI1	523	DC1L1_HUMAN		1	0.999	16	24
Q00534	Q00534 CDK6_HUMAN Cyclin-dependent kinase 6 OS=Homo sapiens OX=9606 GN=CDK6 PE=1 SV=1	CDK6	326	CDK6_HUMAN		1	0.999	16	24
Q07666	Q07666 KHDR1_HUMAN KH domain-containing, RNA-binding, signal transduction-associated protein 1 OS=Homo sapiens OX=9606 GN=KHDRBS1 PE=1 SV=1	KHDRBS1	443	KHDR1_HUMAN	Q07666-2	1	0.999	8	24
P54886	P54886 P5CS_HUMAN Delta-1-pyrroline-5-carboxylate synthase OS=Homo sapiens OX=9606 GN=ALDH18A1 PE=1 SV=2	ALDH18A1	795	P5CS_HUMAN	P54886-2	1	0.999	22	23
O95782	O95782 AP2A1_HUMAN AP-2 complex subunit alpha-1 OS=Homo sapiens OX=9606 GN=AP2A1 PE=1 SV=3	AP2A1	977	AP2A1_HUMAN	O95782-2	1	0.999	27	23
Q9NX63	Q9NX63 MIC19_HUMAN MICOS complex subunit MIC19 OS=Homo sapiens OX=9606 GN=CHCHD3 PE=1 SV=1	CHCHD3	227	MIC19_HUMAN		1	0.999	12	23
P35579	P35579 MYH9_HUMAN Myosin-9 OS=Homo sapiens OX=9606 GN=MYH9 PE=1 SV=4	MYH9	1960	MYH9_HUMAN		1	0.999	103	22
P31939	P31939 PUR9_HUMAN Bifunctional purine biosynthesis protein PURH OS=Homo sapiens OX=9606 GN=ATIC PE=1 SV=3	ATIC	592	PUR9_HUMAN		1	0.999	27	22
P54920	P54920 SNAA_HUMAN Alpha-soluble NSF attachment protein OS=Homo sapiens OX=9606 GN=NAPA PE=1 SV=3	NAPA	295	SNAA_HUMAN		1	0.999	16	22
P39748	P39748 FEN1_HUMAN Flap endonuclease 1 OS=Homo sapiens OX=9606 GN=FEN1 PE=1 SV=1	FEN1	380	FEN1_HUMAN		1	0.999	14	22
P40938	P40938 RFC3_HUMAN Replication factor C subunit 3 OS=Homo sapiens OX=9606 GN=RFC3 PE=1 SV=2	RFC3	356	RFC3_HUMAN		1	0.999	16	21
P17302	P17302 CXA1_HUMAN Gap junction alpha-1 protein OS=Homo sapiens OX=9606 GN=GJA1 PE=1 SV=2	GJA1	382	CXA1_HUMAN		1	0.999	13	21
P35222	P35222 CTNB1_HUMAN Catenin beta-1 OS=Homo sapiens OX=9606 GN=CTNNB1 PE=1 SV=1	CTNNB1	781	CTNB1_HUMAN		1	0.999	21	20
O60313	O60313 OPA1_HUMAN Dynamin-like 120 kDa protein, mitochondrial OS=Homo sapiens OX=9606 GN=OPA1 PE=1 SV=3	OPA1	960	OPA1_HUMAN	O60313-10, O60313-11, O60313-2	1	0.999	19	20
Q14247	Q14247 SRC8_HUMAN Src substrate cortactin OS=Homo sapiens OX=9606 GN=CTTN PE=1 SV=2	CTTN	550	SRC8_HUMAN		1	0.999	12	20
P49419	P49419 AL7A1_HUMAN Alpha-aminoadipic semialdehyde dehydrogenase OS=Homo sapiens OX=9606 GN=ALDH7A1 PE=1 SV=5	ALDH7A1	539	AL7A1_HUMAN	P49419-2	1	0.999	11	20
P30050	P30050 RL12_HUMAN 60S ribosomal protein L12 OS=Homo sapiens OX=9606 GN=RPL12 PE=1 SV=1	RPL12	165	RL12_HUMAN		1	0.999	7	19
P25205	P25205 MCM3_HUMAN DNA replication licensing factor MCM3 OS=Homo sapiens OX=9606 GN=MCM3 PE=1 SV=3	MCM3	808	MCM3_HUMAN	P25205-2	1	0.999	27	19
Q9Y262	Q9Y262 EIF3L_HUMAN Eukaryotic translation initiation factor 3 subunit L OS=Homo sapiens OX=9606 GN=EIF3L PE=1 SV=1	EIF3L	564	EIF3L_HUMAN		1	0.999	25	19
Q96CW1	Q96CW1 AP2M1_HUMAN AP-2 complex subunit mu OS=Homo sapiens OX=9606 GN=AP2M1 PE=1 SV=2	AP2M1	435	AP2M1_HUMAN	Q96CW1-2	1	0.999	14	19
P47755	P47755 CAZA2_HUMAN F-actin-capping protein subunit alpha-2 OS=Homo sapiens OX=9606 GN=CAPZA2 PE=1 SV=3	CAPZA2	286	CAZA2_HUMAN		1	0.999	11	19
P53634	P53634 CATC_HUMAN Dipeptidyl peptidase 1 OS=Homo sapiens OX=9606 GN=CTSC PE=1 SV=2	CTSC	463	CATC_HUMAN		1	0.999	8	19
Q86Y56	Q86Y56 DAAF5_HUMAN Dynein assembly factor 5, axonemal OS=Homo sapiens OX=9606 GN=DNAAF5 PE=1 SV=4	DNAAF5	855	DAAF5_HUMAN		1	0.999	20	19
P19367	P19367 HXK1_HUMAN Hexokinase-1 OS=Homo sapiens OX=9606 GN=HK1 PE=1 SV=3	HK1	917	HXK1_HUMAN	P19367-2, P19367-3, P19367-4	1	0.999	34	18
P13861	P13861 KAP2_HUMAN cAMP-dependent protein kinase type II-alpha regulatory subunit OS=Homo sapiens OX=9606 GN=PRKAR2A PE=1 SV=2	PRKAR2A	404	KAP2_HUMAN	P13861-2	1	0.999	16	18
P60891	P60891 PRPS1_HUMAN Ribose-phosphate pyrophosphokinase 1 OS=Homo sapiens OX=9606 GN=PRPS1 PE=1 SV=2	PRPS1	318	PRPS1_HUMAN		1	0.999	9	18
P08240	P08240 SRPRA_HUMAN Signal recognition particle receptor subunit alpha OS=Homo sapiens OX=9606 GN=SRPRA PE=1 SV=2	SRPRA	638	SRPRA_HUMAN		1	0.999	11	18
Q9Y5L0	Q9Y5L0 TNPO3_HUMAN Transportin-3 OS=Homo sapiens OX=9606 GN=TNPO3 PE=1 SV=3	TNPO3	923	TNPO3_HUMAN	Q9Y5L0-3	1	0.999	15	18
Q12931	Q12931 TRAP1_HUMAN Heat shock protein 75 kDa, mitochondrial OS=Homo sapiens OX=9606 GN=TRAP1 PE=1 SV=3	TRAP1	704	TRAP1_HUMAN	Q12931-2	1	0.999	24	17
P17174	P17174 AATC_HUMAN Aspartate aminotransferase, cytoplasmic OS=Homo sapiens OX=9606 GN=GOT1 PE=1 SV=3	GOT1	413	AATC_HUMAN		1	0.999	18	17
Q8NBS9	Q8NBS9 TXND5_HUMAN Thioredoxin domain-containing protein 5 OS=Homo sapiens OX=9606 GN=TXNDC5 PE=1 SV=2	TXNDC5	432	TXND5_HUMAN		1	0.999	15	17
Q14194	Q14194 DPYL1_HUMAN Dihydropyrimidinase-related protein 1 OS=Homo sapiens OX=9606 GN=CRMP1 PE=1 SV=1	CRMP1	572	DPYL1_HUMAN		1	0.999	21	17
Q53GS9	Q53GS9 SNUT2_HUMAN U4/U6.U5 tri-snRNP-associated protein 2 OS=Homo sapiens OX=9606 GN=USP39 PE=1 SV=2	USP39	565	SNUT2_HUMAN		1	0.999	13	17
P43003	P43003 EAA1_HUMAN Excitatory amino acid transporter 1 OS=Homo sapiens OX=9606 GN=SLC1A3 PE=1 SV=1	SLC1A3	542	EAA1_HUMAN	P43003-2	1	0.999	6	17
P38606	P38606 VATA_HUMAN V-type proton ATPase catalytic subunit A OS=Homo sapiens OX=9606 GN=ATP6V1A PE=1 SV=2	ATP6V1A	617	VATA_HUMAN	P38606-2	1	0.999	22	16
P35606	P35606 COPB2_HUMAN Coatomer subunit beta' OS=Homo sapiens OX=9606 GN=COPB2 PE=1 SV=2	COPB2	906	COPB2_HUMAN	P35606-2	1	0.999	25	16
P28482	P28482 MK01_HUMAN Mitogen-activated protein kinase 1 OS=Homo sapiens OX=9606 GN=MAPK1 PE=1 SV=3	MAPK1	360	MK01_HUMAN		1	0.999	17	16
E9PAV3	E9PAV3 NACAM_HUMAN Nascent polypeptide-associated complex subunit alpha, muscle-specific form OS=Homo sapiens OX=9606 GN=NACA PE=1 SV=1	NACA	2078	NACAM_HUMAN		1	0.999	8	16
Q15637-4	Q15637-4 SF01_HUMAN Isoform 4 of Splicing factor 1 OS=Homo sapiens OX=9606 GN=SF1	SF1	548	SF01_HUMAN		1	0.999	10	16
P10644	P10644 KAP0_HUMAN cAMP-dependent protein kinase type I-alpha regulatory subunit OS=Homo sapiens OX=9606 GN=PRKAR1A PE=1 SV=1	PRKAR1A	381	KAP0_HUMAN		1	0.999	10	16
P60900	P60900 PSA6_HUMAN Proteasome subunit alpha type-6 OS=Homo sapiens OX=9606 GN=PSMA6 PE=1 SV=1	PSMA6	246	PSA6_HUMAN		1	0.999	9	16
Q9UNF1	Q9UNF1 MAGD2_HUMAN Melanoma-associated antigen D2 OS=Homo sapiens OX=9606 GN=MAGED2 PE=1 SV=2	MAGED2	606	MAGD2_HUMAN	Q9UNF1-2	1	0.999	10	16
Q9NR30	Q9NR30 DDX21_HUMAN Nucleolar RNA helicase 2 OS=Homo sapiens OX=9606 GN=DDX21 PE=1 SV=5	DDX21	783	DDX21_HUMAN		1	0.999	10	16
P21266	P21266 GSTM3_HUMAN Glutathione S-transferase Mu 3 OS=Homo sapiens OX=9606 GN=GSTM3 PE=1 SV=3	GSTM3	225	GSTM3_HUMAN		1	0.999	15	15
Q9BWF3	Q9BWF3 RBM4_HUMAN RNA-binding protein 4 OS=Homo sapiens OX=9606 GN=RBM4 PE=1 SV=1	RBM4	364	RBM4_HUMAN		1	0.999	14	15
P11310	P11310 ACADM_HUMAN Medium-chain specific acyl-CoA dehydrogenase, mitochondrial OS=Homo sapiens OX=9606 GN=ACADM PE=1 SV=1	ACADM	421	ACADM_HUMAN	P11310-2	1	0.999	12	15
P19525	P19525 E2AK2_HUMAN Interferon-induced, double-stranded RNA-activated protein kinase OS=Homo sapiens OX=9606 GN=EIF2AK2 PE=1 SV=2	EIF2AK2	551	E2AK2_HUMAN		1	0.999	11	15
Q9UQ03	Q9UQ03 COR2B_HUMAN Coronin-2B OS=Homo sapiens OX=9606 GN=CORO2B PE=1 SV=4	CORO2B	480	COR2B_HUMAN	Q9UQ03-2	1	0.999	7	15
P49585	P49585 PCY1A_HUMAN Choline-phosphate cytidylyltransferase A OS=Homo sapiens OX=9606 GN=PCYT1A PE=1 SV=2	PCYT1A	367	PCY1A_HUMAN		1	0.999	8	14
Q9GZT3	Q9GZT3 SLIRP_HUMAN SRA stem-loop-interacting RNA-binding protein, mitochondrial OS=Homo sapiens OX=9606 GN=SLIRP PE=1 SV=1	SLIRP	109	SLIRP_HUMAN	Q9GZT3-2	1	0.999	8	14
P42224	P42224 STAT1_HUMAN Signal transducer and activator of transcription 1-alpha/beta OS=Homo sapiens OX=9606 GN=STAT1 PE=1 SV=2	STAT1	750	STAT1_HUMAN		1	0.999	17	14
Q92905	Q92905 CSN5_HUMAN COP9 signalosome complex subunit 5 OS=Homo sapiens OX=9606 GN=COPS5 PE=1 SV=4	COPS5	334	CSN5_HUMAN		1	0.999	9	14
O43776	O43776 SYNC_HUMAN Asparagine--tRNA ligase, cytoplasmic OS=Homo sapiens OX=9606 GN=NARS PE=1 SV=1	NARS	548	SYNC_HUMAN		1	0.999	15	14
Q12849	Q12849 GRSF1_HUMAN G-rich sequence factor 1 OS=Homo sapiens OX=9606 GN=GRSF1 PE=1 SV=3	GRSF1	480	GRSF1_HUMAN	Q12849-5	1	0.999	9	14
Q9BY44	Q9BY44 EIF2A_HUMAN Eukaryotic translation initiation factor 2A OS=Homo sapiens OX=9606 GN=EIF2A PE=1 SV=3	EIF2A	585	EIF2A_HUMAN	Q9BY44-3	1	0.999	10	14
P10155	P10155 RO60_HUMAN 60 kDa SS-A/Ro ribonucleoprotein OS=Homo sapiens OX=9606 GN=RO60 PE=1 SV=2	RO60	538	RO60_HUMAN	P10155-3, P10155-4, P10155-5	1	0.999	11	14
Q02750	Q02750 MP2K1_HUMAN Dual specificity mitogen-activated protein kinase kinase 1 OS=Homo sapiens OX=9606 GN=MAP2K1 PE=1 SV=2	MAP2K1	393	MP2K1_HUMAN		1	0.999	14	14
Q9BT78	Q9BT78 CSN4_HUMAN COP9 signalosome complex subunit 4 OS=Homo sapiens OX=9606 GN=COPS4 PE=1 SV=1	COPS4	406	CSN4_HUMAN		1	0.999	13	13
P78417	P78417 GSTO1_HUMAN Glutathione S-transferase omega-1 OS=Homo sapiens OX=9606 GN=GSTO1 PE=1 SV=2	GSTO1	241	GSTO1_HUMAN		1	0.999	10	13
Q02338	Q02338 BDH_HUMAN D-beta-hydroxybutyrate dehydrogenase, mitochondrial OS=Homo sapiens OX=9606 GN=BDH1 PE=1 SV=3	BDH1	343	BDH_HUMAN		1	0.999	8	13
Q99615	Q99615 DNJC7_HUMAN DnaJ homolog subfamily C member 7 OS=Homo sapiens OX=9606 GN=DNAJC7 PE=1 SV=2	DNAJC7	494	DNJC7_HUMAN		1	0.999	12	13
Q14232	Q14232 EI2BA_HUMAN Translation initiation factor eIF-2B subunit alpha OS=Homo sapiens OX=9606 GN=EIF2B1 PE=1 SV=1	EIF2B1	305	EI2BA_HUMAN		1	0.999	10	13
O75347	O75347 TBCA_HUMAN Tubulin-specific chaperone A OS=Homo sapiens OX=9606 GN=TBCA PE=1 SV=3	TBCA	108	TBCA_HUMAN		1	0.999	9	13
Q9NQ29	Q9NQ29 LUC7L_HUMAN Putative RNA-binding protein Luc7-like 1 OS=Homo sapiens OX=9606 GN=LUC7L PE=1 SV=1	LUC7L	371	LUC7L_HUMAN	Q9NQ29-2	1	0.999	7	13
P50281	P50281 MMP14_HUMAN Matrix metalloproteinase-14 OS=Homo sapiens OX=9606 GN=MMP14 PE=1 SV=3	MMP14	582	MMP14_HUMAN		1	0.999	15	12
P30048	P30048 PRDX3_HUMAN Thioredoxin-dependent peroxide reductase, mitochondrial OS=Homo sapiens OX=9606 GN=PRDX3 PE=1 SV=3	PRDX3	256	PRDX3_HUMAN	P30048-2	1	0.999	9	12
Q6P5R6	Q6P5R6 RL22L_HUMAN 60S ribosomal protein L22-like 1 OS=Homo sapiens OX=9606 GN=RPL22L1 PE=1 SV=2	RPL22L1	122	RL22L_HUMAN		1	0.999	5	12
Q15165	Q15165 PON2_HUMAN Serum paraoxonase/arylesterase 2 OS=Homo sapiens OX=9606 GN=PON2 PE=1 SV=4	PON2	354	PON2_HUMAN	Q15165-1	1	0.999	9	12
Q9BZK7	Q9BZK7 TBL1R_HUMAN F-box-like/WD repeat-containing protein TBL1XR1 OS=Homo sapiens OX=9606 GN=TBL1XR1 PE=1 SV=1	TBL1XR1	514	TBL1R_HUMAN		1	0.999	13	12
P61011	P61011 SRP54_HUMAN Signal recognition particle 54 kDa protein OS=Homo sapiens OX=9606 GN=SRP54 PE=1 SV=1	SRP54	504	SRP54_HUMAN		1	0.999	12	12
Q9P035	Q9P035 HACD3_HUMAN Very-long-chain (3R)-3-hydroxyacyl-CoA dehydratase 3 OS=Homo sapiens OX=9606 GN=HACD3 PE=1 SV=2	HACD3	362	HACD3_HUMAN		1	0.999	8	12
Q13561	Q13561 DCTN2_HUMAN Dynactin subunit 2 OS=Homo sapiens OX=9606 GN=DCTN2 PE=1 SV=4	DCTN2	401	DCTN2_HUMAN	Q13561-2, Q13561-3	1	0.999	9	12
P52943	P52943 CRIP2_HUMAN Cysteine-rich protein 2 OS=Homo sapiens OX=9606 GN=CRIP2 PE=1 SV=1	CRIP2	208	CRIP2_HUMAN	P52943-2	1	0.999	6	12
Q8WUM4	Q8WUM4 PDC6I_HUMAN Programmed cell death 6-interacting protein OS=Homo sapiens OX=9606 GN=PDCD6IP PE=1 SV=1	PDCD6IP	868	PDC6I_HUMAN	Q8WUM4-2	1	0.999	11	12
Q9UIJ7	Q9UIJ7 KAD3_HUMAN GTP:AMP phosphotransferase AK3, mitochondrial OS=Homo sapiens OX=9606 GN=AK3 PE=1 SV=4	AK3	227	KAD3_HUMAN		1	0.999	10	12
Q9Y320	Q9Y320 TMX2_HUMAN Thioredoxin-related transmembrane protein 2 OS=Homo sapiens OX=9606 GN=TMX2 PE=1 SV=1	TMX2	296	TMX2_HUMAN		1	0.999	8	12
Q16531	Q16531 DDB1_HUMAN DNA damage-binding protein 1 OS=Homo sapiens OX=9606 GN=DDB1 PE=1 SV=1	DDB1	1140	DDB1_HUMAN		1	0.999	28	11
Q08J23	Q08J23 NSUN2_HUMAN tRNA (cytosine(34)-C(5))-methyltransferase OS=Homo sapiens OX=9606 GN=NSUN2 PE=1 SV=2	NSUN2	767	NSUN2_HUMAN	Q08J23-2	1	0.999	24	11
Q15323	Q15323 K1H1_HUMAN Keratin, type I cuticular Ha1 OS=Homo sapiens OX=9606 GN=KRT31 PE=1 SV=3	KRT31	416	K1H1_HUMAN		1	0.999	18	11
O14531	O14531 DPYL4_HUMAN Dihydropyrimidinase-related protein 4 OS=Homo sapiens OX=9606 GN=DPYSL4 PE=1 SV=2	DPYSL4	572	DPYL4_HUMAN		1	0.999	15	11
P51398	P51398 RT29_HUMAN 28S ribosomal protein S29, mitochondrial OS=Homo sapiens OX=9606 GN=DAP3 PE=1 SV=1	DAP3	398	RT29_HUMAN	P51398-2, P51398-3	1	0.999	10	11
O75533	O75533 SF3B1_HUMAN Splicing factor 3B subunit 1 OS=Homo sapiens OX=9606 GN=SF3B1 PE=1 SV=3	SF3B1	1304	SF3B1_HUMAN		1	0.999	19	11
P49748	P49748 ACADV_HUMAN Very long-chain specific acyl-CoA dehydrogenase, mitochondrial OS=Homo sapiens OX=9606 GN=ACADVL PE=1 SV=1	ACADVL	655	ACADV_HUMAN	P49748-2, P49748-3	1	0.999	13	11
P45974	P45974 UBP5_HUMAN Ubiquitin carboxyl-terminal hydrolase 5 OS=Homo sapiens OX=9606 GN=USP5 PE=1 SV=2	USP5	858	UBP5_HUMAN	P45974-2	1	0.999	16	11
Q14240	Q14240 IF4A2_HUMAN Eukaryotic initiation factor 4A-II OS=Homo sapiens OX=9606 GN=EIF4A2 PE=1 SV=2	EIF4A2	407	IF4A2_HUMAN	Q14240-2	1	0.999	26	11
P42785	P42785 PCP_HUMAN Lysosomal Pro-X carboxypeptidase OS=Homo sapiens OX=9606 GN=PRCP PE=1 SV=1	PRCP	496	PCP_HUMAN	P42785-2	1	0.999	10	11
P30519	P30519 HMOX2_HUMAN Heme oxygenase 2 OS=Homo sapiens OX=9606 GN=HMOX2 PE=1 SV=2	HMOX2	316	HMOX2_HUMAN		1	0.999	9	11
P35250	P35250 RFC2_HUMAN Replication factor C subunit 2 OS=Homo sapiens OX=9606 GN=RFC2 PE=1 SV=3	RFC2	354	RFC2_HUMAN		1	0.999	9	11
Q13310	Q13310 PABP4_HUMAN Polyadenylate-binding protein 4 OS=Homo sapiens OX=9606 GN=PABPC4 PE=1 SV=1	PABPC4	644	PABP4_HUMAN	Q13310-2, Q13310-3	1	0.999	19	11
P49841	P49841 GSK3B_HUMAN Glycogen synthase kinase-3 beta OS=Homo sapiens OX=9606 GN=GSK3B PE=1 SV=2	GSK3B	420	GSK3B_HUMAN	P49841-2	1	0.999	6	11
P26640	P26640 SYVC_HUMAN Valine--tRNA ligase OS=Homo sapiens OX=9606 GN=VARS PE=1 SV=4	VARS	1264	SYVC_HUMAN		1	0.999	33	10
Q9NY33	Q9NY33 DPP3_HUMAN Dipeptidyl peptidase 3 OS=Homo sapiens OX=9606 GN=DPP3 PE=1 SV=2	DPP3	737	DPP3_HUMAN	Q9NY33-4	1	0.999	11	10
P43121	P43121 MUC18_HUMAN Cell surface glycoprotein MUC18 OS=Homo sapiens OX=9606 GN=MCAM PE=1 SV=2	MCAM	646	MUC18_HUMAN		1	0.999	13	10
O75223	O75223 GGCT_HUMAN Gamma-glutamylcyclotransferase OS=Homo sapiens OX=9606 GN=GGCT PE=1 SV=1	GGCT	188	GGCT_HUMAN		1	0.999	8	10
Q16527	Q16527 CSRP2_HUMAN Cysteine and glycine-rich protein 2 OS=Homo sapiens OX=9606 GN=CSRP2 PE=1 SV=3	CSRP2	193	CSRP2_HUMAN		1	0.999	8	10
P35613	P35613 BASI_HUMAN Basigin OS=Homo sapiens OX=9606 GN=BSG PE=1 SV=2	BSG	385	BASI_HUMAN	P35613-2	1	0.999	8	10
Q13501	Q13501 SQSTM_HUMAN Sequestosome-1 OS=Homo sapiens OX=9606 GN=SQSTM1 PE=1 SV=1	SQSTM1	440	SQSTM_HUMAN		1	0.999	8	10
Q16718	Q16718 NDUA5_HUMAN NADH dehydrogenase [ubiquinone] 1 alpha subcomplex subunit 5 OS=Homo sapiens OX=9606 GN=NDUFA5 PE=1 SV=3	NDUFA5	116	NDUA5_HUMAN	Q16718-2	1	0.999	5	10
O00170	O00170 AIP_HUMAN AH receptor-interacting protein OS=Homo sapiens OX=9606 GN=AIP PE=1 SV=2	AIP	330	AIP_HUMAN		1	0.999	9	10
P01889	P01889 1B07_HUMAN HLA class I histocompatibility antigen, B-7 alpha chain OS=Homo sapiens OX=9606 GN=HLA-B PE=1 SV=3	HLA-B	362	1B07_HUMAN		1	0.999	15	10
Q8N1F7	Q8N1F7 NUP93_HUMAN Nuclear pore complex protein Nup93 OS=Homo sapiens OX=9606 GN=NUP93 PE=1 SV=2	NUP93	819	NUP93_HUMAN		1	0.999	14	10
P68402	P68402 PA1B2_HUMAN Platelet-activating factor acetylhydrolase IB subunit beta OS=Homo sapiens OX=9606 GN=PAFAH1B2 PE=1 SV=1	PAFAH1B2	229	PA1B2_HUMAN		1	0.999	5	10
P06737	P06737 PYGL_HUMAN Glycogen phosphorylase, liver form OS=Homo sapiens OX=9606 GN=PYGL PE=1 SV=4	PYGL	847	PYGL_HUMAN	P06737-2	1	0.999	16	10
Q6UXV4	Q6UXV4 MIC27_HUMAN MICOS complex subunit MIC27 OS=Homo sapiens OX=9606 GN=APOOL PE=1 SV=1	APOOL	268	MIC27_HUMAN		1	0.999	3	10
Q9NUQ9	Q9NUQ9 FA49B_HUMAN Protein FAM49B OS=Homo sapiens OX=9606 GN=FAM49B PE=1 SV=1	FAM49B	324	FA49B_HUMAN		1	0.999	10	9
O00291	O00291 HIP1_HUMAN Huntingtin-interacting protein 1 OS=Homo sapiens OX=9606 GN=HIP1 PE=1 SV=5	HIP1	1037	HIP1_HUMAN	O00291-3, O00291-4	1	0.999	23	9
Q14498	Q14498 RBM39_HUMAN RNA-binding protein 39 OS=Homo sapiens OX=9606 GN=RBM39 PE=1 SV=2	RBM39	530	RBM39_HUMAN	Q14498-2, Q14498-3	1	0.999	13	9
O00469-2	O00469-2 PLOD2_HUMAN Isoform 2 of Procollagen-lysine,2-oxoglutarate 5-dioxygenase 2 OS=Homo sapiens OX=9606 GN=PLOD2	PLOD2	758	PLOD2_HUMAN		1	0.999	16	9
Q96I99	Q96I99 SUCB2_HUMAN Succinate--CoA ligase [GDP-forming] subunit beta, mitochondrial OS=Homo sapiens OX=9606 GN=SUCLG2 PE=1 SV=2	SUCLG2	432	SUCB2_HUMAN		1	0.999	14	9
Q6SZW1	Q6SZW1 SARM1_HUMAN Sterile alpha and TIR motif-containing protein 1 OS=Homo sapiens OX=9606 GN=SARM1 PE=1 SV=1	SARM1	724	SARM1_HUMAN		1	0.999	13	9
P13798	P13798 ACPH_HUMAN Acylamino-acid-releasing enzyme OS=Homo sapiens OX=9606 GN=APEH PE=1 SV=4	APEH	732	ACPH_HUMAN		1	0.999	11	9
P62495	P62495 ERF1_HUMAN Eukaryotic peptide chain release factor subunit 1 OS=Homo sapiens OX=9606 GN=ETF1 PE=1 SV=3	ETF1	437	ERF1_HUMAN	P62495-2	1	0.999	13	9
O75915	O75915 PRAF3_HUMAN PRA1 family protein 3 OS=Homo sapiens OX=9606 GN=ARL6IP5 PE=1 SV=1	ARL6IP5	188	PRAF3_HUMAN		1	0.999	4	9
Q00765	Q00765 REEP5_HUMAN Receptor expression-enhancing protein 5 OS=Homo sapiens OX=9606 GN=REEP5 PE=1 SV=3	REEP5	189	REEP5_HUMAN		1	0.999	6	9
Q9BRX8	Q9BRX8 PXL2A_HUMAN Peroxiredoxin-like 2A OS=Homo sapiens OX=9606 GN=PRXL2A PE=1 SV=3	PRXL2A	229	PXL2A_HUMAN	Q9BRX8-2	1	0.999	6	9
P36915	P36915 GNL1_HUMAN Guanine nucleotide-binding protein-like 1 OS=Homo sapiens OX=9606 GN=GNL1 PE=1 SV=2	GNL1	607	GNL1_HUMAN		1	0.999	10	9
P48739	P48739 PIPNB_HUMAN Phosphatidylinositol transfer protein beta isoform OS=Homo sapiens OX=9606 GN=PITPNB PE=1 SV=2	PITPNB	271	PIPNB_HUMAN	P48739-3	1	0.999	9	9
Q13098	Q13098 CSN1_HUMAN COP9 signalosome complex subunit 1 OS=Homo sapiens OX=9606 GN=GPS1 PE=1 SV=4	GPS1	491	CSN1_HUMAN	Q13098-5, Q13098-7	1	0.999	7	9
Q13322	Q13322 GRB10_HUMAN Growth factor receptor-bound protein 10 OS=Homo sapiens OX=9606 GN=GRB10 PE=1 SV=2	GRB10	594	GRB10_HUMAN	Q13322-2, Q13322-4	1	0.999	8	9
P29508	P29508 SPB3_HUMAN Serpin B3 OS=Homo sapiens OX=9606 GN=SERPINB3 PE=1 SV=2	SERPINB3	390	SPB3_HUMAN		1	0.999	17	8
P17655	P17655 CAN2_HUMAN Calpain-2 catalytic subunit OS=Homo sapiens OX=9606 GN=CAPN2 PE=1 SV=6	CAPN2	700	CAN2_HUMAN		1	0.999	17	8
P10599	P10599 THIO_HUMAN Thioredoxin OS=Homo sapiens OX=9606 GN=TXN PE=1 SV=3	TXN	105	THIO_HUMAN		1	0.999	6	8
P29144	P29144 TPP2_HUMAN Tripeptidyl-peptidase 2 OS=Homo sapiens OX=9606 GN=TPP2 PE=1 SV=4	TPP2	1249	TPP2_HUMAN		1	0.999	18	8
P09493-3	P09493-3 TPM1_HUMAN Isoform 3 of Tropomyosin alpha-1 chain OS=Homo sapiens OX=9606 GN=TPM1	TPM1	284	TPM1_HUMAN		1	0.999	25	8
P61019	P61019 RAB2A_HUMAN Ras-related protein Rab-2A OS=Homo sapiens OX=9606 GN=RAB2A PE=1 SV=1	RAB2A	212	RAB2A_HUMAN		1	0.999	8	8
Q86UP2	Q86UP2 KTN1_HUMAN Kinectin OS=Homo sapiens OX=9606 GN=KTN1 PE=1 SV=1	KTN1	1357	KTN1_HUMAN	Q86UP2-2, Q86UP2-4	1	0.999	19	8
P36969	P36969 GPX4_HUMAN Phospholipid hydroperoxide glutathione peroxidase OS=Homo sapiens OX=9606 GN=GPX4 PE=1 SV=3	GPX4	197	GPX4_HUMAN	P36969-2	1	0.999	9	8
P50895	P50895 BCAM_HUMAN Basal cell adhesion molecule OS=Homo sapiens OX=9606 GN=BCAM PE=1 SV=2	BCAM	628	BCAM_HUMAN		1	0.999	13	8
P09486	P09486 SPRC_HUMAN SPARC OS=Homo sapiens OX=9606 GN=SPARC PE=1 SV=1	SPARC	303	SPRC_HUMAN		1	0.999	8	8
Q8IXH7	Q8IXH7 NELFD_HUMAN Negative elongation factor C/D OS=Homo sapiens OX=9606 GN=NELFCD PE=1 SV=2	NELFCD	590	NELFD_HUMAN	Q8IXH7-4	1	0.999	10	8
O43324	O43324 MCA3_HUMAN Eukaryotic translation elongation factor 1 epsilon-1 OS=Homo sapiens OX=9606 GN=EEF1E1 PE=1 SV=1	EEF1E1	174	MCA3_HUMAN	O43324-2	1	0.999	4	8
Q9NWU2	Q9NWU2 GID8_HUMAN Glucose-induced degradation protein 8 homolog OS=Homo sapiens OX=9606 GN=GID8 PE=1 SV=1	GID8	228	GID8_HUMAN		1	0.999	6	8
P15374	P15374 UCHL3_HUMAN Ubiquitin carboxyl-terminal hydrolase isozyme L3 OS=Homo sapiens OX=9606 GN=UCHL3 PE=1 SV=1	UCHL3	230	UCHL3_HUMAN		1	0.999	8	8
Q6NVY1	Q6NVY1 HIBCH_HUMAN 3-hydroxyisobutyryl-CoA hydrolase, mitochondrial OS=Homo sapiens OX=9606 GN=HIBCH PE=1 SV=2	HIBCH	386	HIBCH_HUMAN		1	0.999	8	8
Q7L0J3	Q7L0J3 SV2A_HUMAN Synaptic vesicle glycoprotein 2A OS=Homo sapiens OX=9606 GN=SV2A PE=1 SV=1	SV2A	742	SV2A_HUMAN		1	0.999	8	8
Q9HCU5	Q9HCU5 PREB_HUMAN Prolactin regulatory element-binding protein OS=Homo sapiens OX=9606 GN=PREB PE=1 SV=2	PREB	417	PREB_HUMAN		1	0.999	6	8
Q93034	Q93034 CUL5_HUMAN Cullin-5 OS=Homo sapiens OX=9606 GN=CUL5 PE=1 SV=4	CUL5	780	CUL5_HUMAN		1	0.999	8	8
Q9BY32	Q9BY32 ITPA_HUMAN Inosine triphosphate pyrophosphatase OS=Homo sapiens OX=9606 GN=ITPA PE=1 SV=2	ITPA	194	ITPA_HUMAN		1	0.999	5	8
Q13330	Q13330 MTA1_HUMAN Metastasis-associated protein MTA1 OS=Homo sapiens OX=9606 GN=MTA1 PE=1 SV=2	MTA1	715	MTA1_HUMAN	Q13330-3	1	0.999	11	8
P83436	P83436 COG7_HUMAN Conserved oligomeric Golgi complex subunit 7 OS=Homo sapiens OX=9606 GN=COG7 PE=1 SV=1	COG7	770	COG7_HUMAN		1	0.999	6	8
Q00403	Q00403 TF2B_HUMAN Transcription initiation factor IIB OS=Homo sapiens OX=9606 GN=GTF2B PE=1 SV=1	GTF2B	316	TF2B_HUMAN		1	0.999	5	8
P41225	P41225 SOX3_HUMAN Transcription factor SOX-3 OS=Homo sapiens OX=9606 GN=SOX3 PE=1 SV=2	SOX3	446	SOX3_HUMAN		1	0.999	4	8
Q92665	Q92665 RT31_HUMAN 28S ribosomal protein S31, mitochondrial OS=Homo sapiens OX=9606 GN=MRPS31 PE=1 SV=3	MRPS31	395	RT31_HUMAN		1	0.999	4	8
Q96ER3	Q96ER3 SAAL1_HUMAN Protein SAAL1 OS=Homo sapiens OX=9606 GN=SAAL1 PE=1 SV=2	SAAL1	474	SAAL1_HUMAN		1	0.999	5	8
O95159	O95159 ZFPL1_HUMAN Zinc finger protein-like 1 OS=Homo sapiens OX=9606 GN=ZFPL1 PE=1 SV=2	ZFPL1	310	ZFPL1_HUMAN		1	0.999	6	8
Q96HY6	Q96HY6 DDRGK_HUMAN DDRGK domain-containing protein 1 OS=Homo sapiens OX=9606 GN=DDRGK1 PE=1 SV=2	DDRGK1	314	DDRGK_HUMAN		1	0.999	4	8
Q7KZN9	Q7KZN9 COX15_HUMAN Cytochrome c oxidase assembly protein COX15 homolog OS=Homo sapiens OX=9606 GN=COX15 PE=1 SV=1	COX15	410	COX15_HUMAN	Q7KZN9-2	1	0.999	3	8
Q8N766	Q8N766 EMC1_HUMAN ER membrane protein complex subunit 1 OS=Homo sapiens OX=9606 GN=EMC1 PE=1 SV=1	EMC1	993	EMC1_HUMAN	Q8N766-2, Q8N766-4	1	0.999	6	8
O00764	O00764 PDXK_HUMAN Pyridoxal kinase OS=Homo sapiens OX=9606 GN=PDXK PE=1 SV=1	PDXK	312	PDXK_HUMAN		1	0.999	5	8
Q6NUM9	Q6NUM9 RETST_HUMAN All-trans-retinol 13,14-reductase OS=Homo sapiens OX=9606 GN=RETSAT PE=1 SV=2	RETSAT	610	RETST_HUMAN		1	0.999	6	8
Q9BSJ8	Q9BSJ8 ESYT1_HUMAN Extended synaptotagmin-1 OS=Homo sapiens OX=9606 GN=ESYT1 PE=1 SV=1	ESYT1	1104	ESYT1_HUMAN	Q9BSJ8-2	1	0.999	26	7
P07384	P07384 CAN1_HUMAN Calpain-1 catalytic subunit OS=Homo sapiens OX=9606 GN=CAPN1 PE=1 SV=1	CAPN1	714	CAN1_HUMAN		1	0.999	13	7
Q08431	Q08431 MFGM_HUMAN Lactadherin OS=Homo sapiens OX=9606 GN=MFGE8 PE=1 SV=3	MFGE8	387	MFGM_HUMAN		1	0.999	10	7
P10253	P10253 LYAG_HUMAN Lysosomal alpha-glucosidase OS=Homo sapiens OX=9606 GN=GAA PE=1 SV=4	GAA	952	LYAG_HUMAN		1	0.999	13	7
P07203	P07203 GPX1_HUMAN Glutathione peroxidase 1 OS=Homo sapiens OX=9606 GN=GPX1 PE=1 SV=4	GPX1	203	GPX1_HUMAN		1	0.999	11	7
Q9NYL9	Q9NYL9 TMOD3_HUMAN Tropomodulin-3 OS=Homo sapiens OX=9606 GN=TMOD3 PE=1 SV=1	TMOD3	352	TMOD3_HUMAN		1	0.999	10	7
Q92688	Q92688 AN32B_HUMAN Acidic leucine-rich nuclear phosphoprotein 32 family member B OS=Homo sapiens OX=9606 GN=ANP32B PE=1 SV=1	ANP32B	251	AN32B_HUMAN	Q92688-2	1	0.999	7	7
P55145	P55145 MANF_HUMAN Mesencephalic astrocyte-derived neurotrophic factor OS=Homo sapiens OX=9606 GN=MANF PE=1 SV=3	MANF	182	MANF_HUMAN		1	0.999	9	7
Q13451	Q13451 FKBP5_HUMAN Peptidyl-prolyl cis-trans isomerase FKBP5 OS=Homo sapiens OX=9606 GN=FKBP5 PE=1 SV=2	FKBP5	457	FKBP5_HUMAN		1	0.999	11	7
Q8TEA8	Q8TEA8 DTD1_HUMAN D-aminoacyl-tRNA deacylase 1 OS=Homo sapiens OX=9606 GN=DTD1 PE=1 SV=2	DTD1	209	DTD1_HUMAN		1	0.999	5	7
P80404	P80404 GABT_HUMAN 4-aminobutyrate aminotransferase, mitochondrial OS=Homo sapiens OX=9606 GN=ABAT PE=1 SV=3	ABAT	500	GABT_HUMAN		1	0.999	11	7
Q6P1J9	Q6P1J9 CDC73_HUMAN Parafibromin OS=Homo sapiens OX=9606 GN=CDC73 PE=1 SV=1	CDC73	531	CDC73_HUMAN		1	0.999	7	7
Q96CX2	Q96CX2 KCD12_HUMAN BTB/POZ domain-containing protein KCTD12 OS=Homo sapiens OX=9606 GN=KCTD12 PE=1 SV=1	KCTD12	325	KCD12_HUMAN		1	0.999	7	7
Q9NZU0	Q9NZU0 FLRT3_HUMAN Leucine-rich repeat transmembrane protein FLRT3 OS=Homo sapiens OX=9606 GN=FLRT3 PE=1 SV=1	FLRT3	649	FLRT3_HUMAN		1	0.999	11	7
Q9UDR5	Q9UDR5 AASS_HUMAN Alpha-aminoadipic semialdehyde synthase, mitochondrial OS=Homo sapiens OX=9606 GN=AASS PE=1 SV=1	AASS	926	AASS_HUMAN		1	0.999	9	7
P10321	P10321 1C07_HUMAN HLA class I histocompatibility antigen, Cw-7 alpha chain OS=Homo sapiens OX=9606 GN=HLA-C PE=1 SV=3	HLA-C	366	1C07_HUMAN		1	0.999	15	7
Q9UHY1	Q9UHY1 NRBP_HUMAN Nuclear receptor-binding protein OS=Homo sapiens OX=9606 GN=NRBP1 PE=1 SV=1	NRBP1	535	NRBP_HUMAN		1	0.999	6	7
P28062	P28062 PSB8_HUMAN Proteasome subunit beta type-8 OS=Homo sapiens OX=9606 GN=PSMB8 PE=1 SV=3	PSMB8	276	PSB8_HUMAN	P28062-2	1	0.999	7	7
P31942	P31942 HNRH3_HUMAN Heterogeneous nuclear ribonucleoprotein H3 OS=Homo sapiens OX=9606 GN=HNRNPH3 PE=1 SV=2	HNRNPH3	346	HNRH3_HUMAN	P31942-2	1	0.999	5	7
Q9NR77	Q9NR77 PXMP2_HUMAN Peroxisomal membrane protein 2 OS=Homo sapiens OX=9606 GN=PXMP2 PE=1 SV=3	PXMP2	195	PXMP2_HUMAN		1	0.999	3	7
P58005	P58005 SESN3_HUMAN Sestrin-3 OS=Homo sapiens OX=9606 GN=SESN3 PE=1 SV=2	SESN3	492	SESN3_HUMAN		1	0.999	7	7
P82979	P82979 SARNP_HUMAN SAP domain-containing ribonucleoprotein OS=Homo sapiens OX=9606 GN=SARNP PE=1 SV=3	SARNP	210	SARNP_HUMAN		1	0.999	6	7
Q13409	Q13409 DC1I2_HUMAN Cytoplasmic dynein 1 intermediate chain 2 OS=Homo sapiens OX=9606 GN=DYNC1I2 PE=1 SV=3	DYNC1I2	638	DC1I2_HUMAN	Q13409-2, Q13409-3, Q13409-7	1	0.999	7	7
O96011	O96011 PX11B_HUMAN Peroxisomal membrane protein 11B OS=Homo sapiens OX=9606 GN=PEX11B PE=1 SV=1	PEX11B	259	PX11B_HUMAN	O96011-2	1	0.999	8	7
Q9Y3Z3	Q9Y3Z3 SAMH1_HUMAN Deoxynucleoside triphosphate triphosphohydrolase SAMHD1 OS=Homo sapiens OX=9606 GN=SAMHD1 PE=1 SV=2	SAMHD1	626	SAMH1_HUMAN	Q9Y3Z3-3	1	0.999	6	7
Q13442	Q13442 HAP28_HUMAN 28 kDa heat- and acid-stable phosphoprotein OS=Homo sapiens OX=9606 GN=PDAP1 PE=1 SV=1	PDAP1	181	HAP28_HUMAN		1	0.999	6	7
Q8NE86	Q8NE86 MCU_HUMAN Calcium uniporter protein, mitochondrial OS=Homo sapiens OX=9606 GN=MCU PE=1 SV=1	MCU	351	MCU_HUMAN	Q8NE86-3	1	0.999	6	7
Q99471	Q99471 PFD5_HUMAN Prefoldin subunit 5 OS=Homo sapiens OX=9606 GN=PFDN5 PE=1 SV=2	PFDN5	154	PFD5_HUMAN		1	0.999	2	7
O95983	O95983 MBD3_HUMAN Methyl-CpG-binding domain protein 3 OS=Homo sapiens OX=9606 GN=MBD3 PE=1 SV=1	MBD3	291	MBD3_HUMAN	O95983-2	1	0.999	6	7
P07741	P07741 APT_HUMAN Adenine phosphoribosyltransferase OS=Homo sapiens OX=9606 GN=APRT PE=1 SV=2	APRT	180	APT_HUMAN		1	0.999	6	6
P80303	P80303 NUCB2_HUMAN Nucleobindin-2 OS=Homo sapiens OX=9606 GN=NUCB2 PE=1 SV=3	NUCB2	420	NUCB2_HUMAN	P80303-2	1	0.999	9	6
Q9UJX3	Q9UJX3 APC7_HUMAN Anaphase-promoting complex subunit 7 OS=Homo sapiens OX=9606 GN=ANAPC7 PE=1 SV=4	ANAPC7	599	APC7_HUMAN	Q9UJX3-2	1	0.999	12	6
Q9Y2B0	Q9Y2B0 CNPY2_HUMAN Protein canopy homolog 2 OS=Homo sapiens OX=9606 GN=CNPY2 PE=1 SV=1	CNPY2	182	CNPY2_HUMAN		1	0.999	10	6
O94919	O94919 ENDD1_HUMAN Endonuclease domain-containing 1 protein OS=Homo sapiens OX=9606 GN=ENDOD1 PE=1 SV=2	ENDOD1	500	ENDD1_HUMAN		1	0.999	9	6
Q14320	Q14320 FA50A_HUMAN Protein FAM50A OS=Homo sapiens OX=9606 GN=FAM50A PE=1 SV=2	FAM50A	339	FA50A_HUMAN		1	0.999	9	6
Q96EP5	Q96EP5 DAZP1_HUMAN DAZ-associated protein 1 OS=Homo sapiens OX=9606 GN=DAZAP1 PE=1 SV=1	DAZAP1	407	DAZP1_HUMAN	Q96EP5-2	1	0.999	4	6
O95202	O95202 LETM1_HUMAN Mitochondrial proton/calcium exchanger protein OS=Homo sapiens OX=9606 GN=LETM1 PE=1 SV=1	LETM1	739	LETM1_HUMAN		1	0.999	9	6
Q15427	Q15427 SF3B4_HUMAN Splicing factor 3B subunit 4 OS=Homo sapiens OX=9606 GN=SF3B4 PE=1 SV=1	SF3B4	424	SF3B4_HUMAN		1	0.999	4	6
P36405	P36405 ARL3_HUMAN ADP-ribosylation factor-like protein 3 OS=Homo sapiens OX=9606 GN=ARL3 PE=1 SV=2	ARL3	182	ARL3_HUMAN		1	0.999	5	6
P61764	P61764 STXB1_HUMAN Syntaxin-binding protein 1 OS=Homo sapiens OX=9606 GN=STXBP1 PE=1 SV=1	STXBP1	594	STXB1_HUMAN		1	0.999	9	6
Q04446	Q04446 GLGB_HUMAN 1,4-alpha-glucan-branching enzyme OS=Homo sapiens OX=9606 GN=GBE1 PE=1 SV=3	GBE1	702	GLGB_HUMAN		1	0.999	6	6
O95232	O95232 LC7L3_HUMAN Luc7-like protein 3 OS=Homo sapiens OX=9606 GN=LUC7L3 PE=1 SV=2	LUC7L3	432	LC7L3_HUMAN		1	0.999	5	6
Q13573	Q13573 SNW1_HUMAN SNW domain-containing protein 1 OS=Homo sapiens OX=9606 GN=SNW1 PE=1 SV=1	SNW1	536	SNW1_HUMAN		1	0.999	5	6
P35052	P35052 GPC1_HUMAN Glypican-1 OS=Homo sapiens OX=9606 GN=GPC1 PE=1 SV=2	GPC1	558	GPC1_HUMAN		1	0.999	8	6
Q13043	Q13043 STK4_HUMAN Serine/threonine-protein kinase 4 OS=Homo sapiens OX=9606 GN=STK4 PE=1 SV=2	STK4	487	STK4_HUMAN	Q13043-2	1	0.999	7	6
Q9NUJ1	Q9NUJ1 ABHDA_HUMAN Mycophenolic acid acyl-glucuronide esterase, mitochondrial OS=Homo sapiens OX=9606 GN=ABHD10 PE=1 SV=1	ABHD10	306	ABHDA_HUMAN		1	0.999	7	6
O00471	O00471 EXOC5_HUMAN Exocyst complex component 5 OS=Homo sapiens OX=9606 GN=EXOC5 PE=1 SV=1	EXOC5	708	EXOC5_HUMAN		1	0.999	7	6
O43292	O43292 GPAA1_HUMAN Glycosylphosphatidylinositol anchor attachment 1 protein OS=Homo sapiens OX=9606 GN=GPAA1 PE=1 SV=3	GPAA1	621	GPAA1_HUMAN		1	0.999	5	6
P61006	P61006 RAB8A_HUMAN Ras-related protein Rab-8A OS=Homo sapiens OX=9606 GN=RAB8A PE=1 SV=1	RAB8A	207	RAB8A_HUMAN		1	0.999	8	6
Q13085	Q13085 ACACA_HUMAN Acetyl-CoA carboxylase 1 OS=Homo sapiens OX=9606 GN=ACACA PE=1 SV=2	ACACA	2346	ACACA_HUMAN	Q13085-4	1	0.999	9	6
O75937	O75937 DNJC8_HUMAN DnaJ homolog subfamily C member 8 OS=Homo sapiens OX=9606 GN=DNAJC8 PE=1 SV=2	DNAJC8	253	DNJC8_HUMAN		1	0.999	5	6
P18065	P18065 IBP2_HUMAN Insulin-like growth factor-binding protein 2 OS=Homo sapiens OX=9606 GN=IGFBP2 PE=1 SV=2	IGFBP2	325	IBP2_HUMAN		1	0.999	7	6
Q14558	Q14558 KPRA_HUMAN Phosphoribosyl pyrophosphate synthase-associated protein 1 OS=Homo sapiens OX=9606 GN=PRPSAP1 PE=1 SV=2	PRPSAP1	356	KPRA_HUMAN	Q14558-2	1	0.999	7	6
Q9BQA9	Q9BQA9 CYBC1_HUMAN Cytochrome b-245 chaperone 1 OS=Homo sapiens OX=9606 GN=CYBC1 PE=1 SV=1	CYBC1	187	CYBC1_HUMAN	Q9BQA9-2	1	0.999	5	6
Q9UBU8	Q9UBU8 MO4L1_HUMAN Mortality factor 4-like protein 1 OS=Homo sapiens OX=9606 GN=MORF4L1 PE=1 SV=2	MORF4L1	362	MO4L1_HUMAN	Q9UBU8-2	1	0.999	5	6
O00400	O00400 ACATN_HUMAN Acetyl-coenzyme A transporter 1 OS=Homo sapiens OX=9606 GN=SLC33A1 PE=1 SV=1	SLC33A1	549	ACATN_HUMAN		1	0.999	5	6
O94888	O94888 UBXN7_HUMAN UBX domain-containing protein 7 OS=Homo sapiens OX=9606 GN=UBXN7 PE=1 SV=2	UBXN7	489	UBXN7_HUMAN		1	0.999	5	6
P24390	P24390 ERD21_HUMAN ER lumen protein-retaining receptor 1 OS=Homo sapiens OX=9606 GN=KDELR1 PE=1 SV=1	KDELR1	212	ERD21_HUMAN		1	0.999	3	6
P84095	P84095 RHOG_HUMAN Rho-related GTP-binding protein RhoG OS=Homo sapiens OX=9606 GN=RHOG PE=1 SV=1	RHOG	191	RHOG_HUMAN		1	0.999	7	6
Q13131	Q13131 AAPK1_HUMAN 5'-AMP-activated protein kinase catalytic subunit alpha-1 OS=Homo sapiens OX=9606 GN=PRKAA1 PE=1 SV=4	PRKAA1	559	AAPK1_HUMAN	Q13131-2	1	0.999	7	6
Q96CT7	Q96CT7 CC124_HUMAN Coiled-coil domain-containing protein 124 OS=Homo sapiens OX=9606 GN=CCDC124 PE=1 SV=1	CCDC124	223	CC124_HUMAN		1	0.999	5	6
P28065	P28065 PSB9_HUMAN Proteasome subunit beta type-9 OS=Homo sapiens OX=9606 GN=PSMB9 PE=1 SV=2	PSMB9	219	PSB9_HUMAN	P28065-2	1	0.999	4	6
O94760	O94760 DDAH1_HUMAN N(G),N(G)-dimethylarginine dimethylaminohydrolase 1 OS=Homo sapiens OX=9606 GN=DDAH1 PE=1 SV=3	DDAH1	285	DDAH1_HUMAN		1	0.999	6	6
Q9BZG1	Q9BZG1 RAB34_HUMAN Ras-related protein Rab-34 OS=Homo sapiens OX=9606 GN=RAB34 PE=1 SV=1	RAB34	259	RAB34_HUMAN		1	0.999	7	6
Q96JB2	Q96JB2 COG3_HUMAN Conserved oligomeric Golgi complex subunit 3 OS=Homo sapiens OX=9606 GN=COG3 PE=1 SV=3	COG3	828	COG3_HUMAN		1	0.999	6	6
Q9P2K5	Q9P2K5 MYEF2_HUMAN Myelin expression factor 2 OS=Homo sapiens OX=9606 GN=MYEF2 PE=1 SV=3	MYEF2	600	MYEF2_HUMAN		1	0.999	3	6
Q9Y223	Q9Y223 GLCNE_HUMAN Bifunctional UDP-N-acetylglucosamine 2-epimerase/N-acetylmannosamine kinase OS=Homo sapiens OX=9606 GN=GNE PE=1 SV=1	GNE	722	GLCNE_HUMAN	Q9Y223-2, Q9Y223-3	1	0.999	6	6
P81605	P81605 DCD_HUMAN Dermcidin OS=Homo sapiens OX=9606 GN=DCD PE=1 SV=2	DCD	110	DCD_HUMAN		1	0.999	7	5
Q13363	Q13363 CTBP1_HUMAN C-terminal-binding protein 1 OS=Homo sapiens OX=9606 GN=CTBP1 PE=1 SV=2	CTBP1	440	CTBP1_HUMAN	Q13363-2	1	0.999	10	5
Q00169	Q00169 PIPNA_HUMAN Phosphatidylinositol transfer protein alpha isoform OS=Homo sapiens OX=9606 GN=PITPNA PE=1 SV=2	PITPNA	270	PIPNA_HUMAN		1	0.999	7	5
Q7L576	Q7L576 CYFP1_HUMAN Cytoplasmic FMR1-interacting protein 1 OS=Homo sapiens OX=9606 GN=CYFIP1 PE=1 SV=1	CYFIP1	1253	CYFP1_HUMAN		1	0.999	16	5
Q13435	Q13435 SF3B2_HUMAN Splicing factor 3B subunit 2 OS=Homo sapiens OX=9606 GN=SF3B2 PE=1 SV=2	SF3B2	895	SF3B2_HUMAN		1	0.999	11	5
Q9HD33	Q9HD33 RM47_HUMAN 39S ribosomal protein L47, mitochondrial OS=Homo sapiens OX=9606 GN=MRPL47 PE=1 SV=2	MRPL47	250	RM47_HUMAN	Q9HD33-2	1	0.999	7	5
O95865	O95865 DDAH2_HUMAN N(G),N(G)-dimethylarginine dimethylaminohydrolase 2 OS=Homo sapiens OX=9606 GN=DDAH2 PE=1 SV=1	DDAH2	285	DDAH2_HUMAN		1	0.999	6	5
Q96GD0	Q96GD0 PLPP_HUMAN Pyridoxal phosphate phosphatase OS=Homo sapiens OX=9606 GN=PDXP PE=1 SV=2	PDXP	296	PLPP_HUMAN		1	0.999	6	5
P54727	P54727 RD23B_HUMAN UV excision repair protein RAD23 homolog B OS=Homo sapiens OX=9606 GN=RAD23B PE=1 SV=1	RAD23B	409	RD23B_HUMAN		1	0.999	7	5
Q9BR76	Q9BR76 COR1B_HUMAN Coronin-1B OS=Homo sapiens OX=9606 GN=CORO1B PE=1 SV=1	CORO1B	489	COR1B_HUMAN		1	0.999	7	5
Q9NWV4	Q9NWV4 CZIB_HUMAN CXXC motif containing zinc binding protein OS=Homo sapiens OX=9606 GN=CZIB PE=1 SV=1	CZIB	160	CZIB_HUMAN		1	0.999	3	5
P20073	P20073 ANXA7_HUMAN Annexin A7 OS=Homo sapiens OX=9606 GN=ANXA7 PE=1 SV=3	ANXA7	488	ANXA7_HUMAN	P20073-2	1	0.999	8	5
P62136	P62136 PP1A_HUMAN Serine/threonine-protein phosphatase PP1-alpha catalytic subunit OS=Homo sapiens OX=9606 GN=PPP1CA PE=1 SV=1	PPP1CA	330	PP1A_HUMAN		1	0.999	20	5
P40222	P40222 TXLNA_HUMAN Alpha-taxilin OS=Homo sapiens OX=9606 GN=TXLNA PE=1 SV=3	TXLNA	546	TXLNA_HUMAN		1	0.999	8	5
O00151	O00151 PDLI1_HUMAN PDZ and LIM domain protein 1 OS=Homo sapiens OX=9606 GN=PDLIM1 PE=1 SV=4	PDLIM1	329	PDLI1_HUMAN		1	0.999	8	5
O15228	O15228 GNPAT_HUMAN Dihydroxyacetone phosphate acyltransferase OS=Homo sapiens OX=9606 GN=GNPAT PE=1 SV=1	GNPAT	680	GNPAT_HUMAN		1	0.999	7	5
O75521	O75521 ECI2_HUMAN Enoyl-CoA delta isomerase 2, mitochondrial OS=Homo sapiens OX=9606 GN=ECI2 PE=1 SV=4	ECI2	394	ECI2_HUMAN	O75521-2	1	0.999	8	5
O00505	O00505 IMA4_HUMAN Importin subunit alpha-4 OS=Homo sapiens OX=9606 GN=KPNA3 PE=1 SV=2	KPNA3	521	IMA4_HUMAN		1	0.999	10	5
Q99470	Q99470 SDF2_HUMAN Stromal cell-derived factor 2 OS=Homo sapiens OX=9606 GN=SDF2 PE=1 SV=2	SDF2	211	SDF2_HUMAN		1	0.999	4	5
Q9BQ69	Q9BQ69 MACD1_HUMAN ADP-ribose glycohydrolase MACROD1 OS=Homo sapiens OX=9606 GN=MACROD1 PE=1 SV=2	MACROD1	325	MACD1_HUMAN		1	0.999	4	5
Q9Y478	Q9Y478 AAKB1_HUMAN 5'-AMP-activated protein kinase subunit beta-1 OS=Homo sapiens OX=9606 GN=PRKAB1 PE=1 SV=4	PRKAB1	270	AAKB1_HUMAN		1	0.999	3	5
O43290	O43290 SNUT1_HUMAN U4/U6.U5 tri-snRNP-associated protein 1 OS=Homo sapiens OX=9606 GN=SART1 PE=1 SV=1	SART1	800	SNUT1_HUMAN		1	0.999	2	5
Q8TBP6	Q8TBP6 S2540_HUMAN Solute carrier family 25 member 40 OS=Homo sapiens OX=9606 GN=SLC25A40 PE=1 SV=1	SLC25A40	338	S2540_HUMAN		1	0.999	6	5
Q96SL4	Q96SL4 GPX7_HUMAN Glutathione peroxidase 7 OS=Homo sapiens OX=9606 GN=GPX7 PE=1 SV=1	GPX7	187	GPX7_HUMAN		1	0.999	4	5
Q9UM22	Q9UM22 EPDR1_HUMAN Mammalian ependymin-related protein 1 OS=Homo sapiens OX=9606 GN=EPDR1 PE=1 SV=2	EPDR1	224	EPDR1_HUMAN		1	0.999	4	5
O95249	O95249 GOSR1_HUMAN Golgi SNAP receptor complex member 1 OS=Homo sapiens OX=9606 GN=GOSR1 PE=1 SV=1	GOSR1	250	GOSR1_HUMAN		1	0.999	3	5
Q8NBF2	Q8NBF2 NHLC2_HUMAN NHL repeat-containing protein 2 OS=Homo sapiens OX=9606 GN=NHLRC2 PE=1 SV=1	NHLRC2	726	NHLC2_HUMAN		1	0.999	9	5
Q9NXS2	Q9NXS2 QPCTL_HUMAN Glutaminyl-peptide cyclotransferase-like protein OS=Homo sapiens OX=9606 GN=QPCTL PE=1 SV=2	QPCTL	382	QPCTL_HUMAN		1	0.999	4	5
Q96C90	Q96C90 PP14B_HUMAN Protein phosphatase 1 regulatory subunit 14B OS=Homo sapiens OX=9606 GN=PPP1R14B PE=1 SV=3	PPP1R14B	147	PP14B_HUMAN		1	0.999	3	5
P55263	P55263 ADK_HUMAN Adenosine kinase OS=Homo sapiens OX=9606 GN=ADK PE=1 SV=2	ADK	362	ADK_HUMAN	P55263-2	1	0.999	4	5
Q9BY42	Q9BY42 RTF2_HUMAN Replication termination factor 2 OS=Homo sapiens OX=9606 GN=RTF2 PE=1 SV=3	RTF2	306	RTF2_HUMAN		1	0.999	4	5
Q9H2J4	Q9H2J4 PDCL3_HUMAN Phosducin-like protein 3 OS=Homo sapiens OX=9606 GN=PDCL3 PE=1 SV=1	PDCL3	239	PDCL3_HUMAN		1	0.999	3	5
Q9BW72	Q9BW72 HIG2A_HUMAN HIG1 domain family member 2A, mitochondrial OS=Homo sapiens OX=9606 GN=HIGD2A PE=1 SV=1	HIGD2A	106	HIG2A_HUMAN		0.9993	0.999	2	5
Q9UHD1	Q9UHD1 CHRD1_HUMAN Cysteine and histidine-rich domain-containing protein 1 OS=Homo sapiens OX=9606 GN=CHORDC1 PE=1 SV=2	CHORDC1	332	CHRD1_HUMAN		1	0.999	5	5
O15397	O15397 IPO8_HUMAN Importin-8 OS=Homo sapiens OX=9606 GN=IPO8 PE=1 SV=2	IPO8	1037	IPO8_HUMAN		1	0.999	5	5
O60488	O60488 ACSL4_HUMAN Long-chain-fatty-acid--CoA ligase 4 OS=Homo sapiens OX=9606 GN=ACSL4 PE=1 SV=2	ACSL4	711	ACSL4_HUMAN	O60488-2	1	0.999	6	5
P50479	P50479 PDLI4_HUMAN PDZ and LIM domain protein 4 OS=Homo sapiens OX=9606 GN=PDLIM4 PE=1 SV=2	PDLIM4	330	PDLI4_HUMAN		1	0.999	4	5
Q12974	Q12974 TP4A2_HUMAN Protein tyrosine phosphatase type IVA 2 OS=Homo sapiens OX=9606 GN=PTP4A2 PE=1 SV=1	PTP4A2	167	TP4A2_HUMAN		1	0.999	3	5
Q8NHH9	Q8NHH9 ATLA2_HUMAN Atlastin-2 OS=Homo sapiens OX=9606 GN=ATL2 PE=1 SV=2	ATL2	583	ATLA2_HUMAN	Q8NHH9-5	1	0.999	3	5
Q9UN70	Q9UN70 PCDGK_HUMAN Protocadherin gamma-C3 OS=Homo sapiens OX=9606 GN=PCDHGC3 PE=1 SV=1	PCDHGC3	934	PCDGK_HUMAN		1	0.999	17	4
Q562R1	Q562R1 ACTBL_HUMAN Beta-actin-like protein 2 OS=Homo sapiens OX=9606 GN=ACTBL2 PE=1 SV=2	ACTBL2	376	ACTBL_HUMAN		1	0.999	18	4
O75822	O75822 EIF3J_HUMAN Eukaryotic translation initiation factor 3 subunit J OS=Homo sapiens OX=9606 GN=EIF3J PE=1 SV=2	EIF3J	258	EIF3J_HUMAN	O75822-3	1	0.999	8	4
Q8WXX5	Q8WXX5 DNJC9_HUMAN DnaJ homolog subfamily C member 9 OS=Homo sapiens OX=9606 GN=DNAJC9 PE=1 SV=1	DNAJC9	260	DNJC9_HUMAN		1	0.999	10	4
O43505	O43505 B4GA1_HUMAN Beta-1,4-glucuronyltransferase 1 OS=Homo sapiens OX=9606 GN=B4GAT1 PE=1 SV=1	B4GAT1	415	B4GA1_HUMAN		1	0.999	8	4
Q53EL6	Q53EL6 PDCD4_HUMAN Programmed cell death protein 4 OS=Homo sapiens OX=9606 GN=PDCD4 PE=1 SV=2	PDCD4	469	PDCD4_HUMAN	Q53EL6-2	1	0.999	10	4
Q9H3G5	Q9H3G5 CPVL_HUMAN Probable serine carboxypeptidase CPVL OS=Homo sapiens OX=9606 GN=CPVL PE=1 SV=2	CPVL	476	CPVL_HUMAN		1	0.999	7	4
Q05048	Q05048 CSTF1_HUMAN Cleavage stimulation factor subunit 1 OS=Homo sapiens OX=9606 GN=CSTF1 PE=1 SV=1	CSTF1	431	CSTF1_HUMAN		1	0.999	7	4
Q16352	Q16352 AINX_HUMAN Alpha-internexin OS=Homo sapiens OX=9606 GN=INA PE=1 SV=2	INA	499	AINX_HUMAN		0.9918	0.9989	3	4
Q9NQX3	Q9NQX3 GEPH_HUMAN Gephyrin OS=Homo sapiens OX=9606 GN=GPHN PE=1 SV=1	GPHN	736	GEPH_HUMAN	Q9NQX3-2	1	0.999	11	4
P63220	P63220 RS21_HUMAN 40S ribosomal protein S21 OS=Homo sapiens OX=9606 GN=RPS21 PE=1 SV=1	RPS21	83	RS21_HUMAN		1	0.999	4	4
O76031	O76031 CLPX_HUMAN ATP-dependent Clp protease ATP-binding subunit clpX-like, mitochondrial OS=Homo sapiens OX=9606 GN=CLPX PE=1 SV=2	CLPX	633	CLPX_HUMAN		1	0.999	8	4
P62861	P62861 RS30_HUMAN 40S ribosomal protein S30 OS=Homo sapiens OX=9606 GN=FAU PE=1 SV=1	FAU	59	RS30_HUMAN		1	0.999	3	4
Q8WVY7	Q8WVY7 UBCP1_HUMAN Ubiquitin-like domain-containing CTD phosphatase 1 OS=Homo sapiens OX=9606 GN=UBLCP1 PE=1 SV=2	UBLCP1	318	UBCP1_HUMAN		1	0.999	4	4
O60282	O60282 KIF5C_HUMAN Kinesin heavy chain isoform 5C OS=Homo sapiens OX=9606 GN=KIF5C PE=1 SV=1	KIF5C	957	KIF5C_HUMAN		1	0.999	12	4
Q96QR8	Q96QR8 PURB_HUMAN Transcriptional activator protein Pur-beta OS=Homo sapiens OX=9606 GN=PURB PE=1 SV=3	PURB	312	PURB_HUMAN		1	0.999	6	4
Q8WXF7	Q8WXF7 ATLA1_HUMAN Atlastin-1 OS=Homo sapiens OX=9606 GN=ATL1 PE=1 SV=1	ATL1	558	ATLA1_HUMAN	Q8WXF7-2	1	0.999	7	4
Q92466	Q92466 DDB2_HUMAN DNA damage-binding protein 2 OS=Homo sapiens OX=9606 GN=DDB2 PE=1 SV=1	DDB2	427	DDB2_HUMAN		1	0.999	5	4
Q96AX1	Q96AX1 VP33A_HUMAN Vacuolar protein sorting-associated protein 33A OS=Homo sapiens OX=9606 GN=VPS33A PE=1 SV=1	VPS33A	596	VP33A_HUMAN		1	0.999	4	4
Q9BQ67	Q9BQ67 GRWD1_HUMAN Glutamate-rich WD repeat-containing protein 1 OS=Homo sapiens OX=9606 GN=GRWD1 PE=1 SV=1	GRWD1	446	GRWD1_HUMAN		1	0.999	5	4
Q9NX46	Q9NX46 ARHL2_HUMAN ADP-ribose glycohydrolase ARH3 OS=Homo sapiens OX=9606 GN=ADPRHL2 PE=1 SV=1	ADPRHL2	363	ARHL2_HUMAN		1	0.999	5	4
O75352	O75352 MPU1_HUMAN Mannose-P-dolichol utilization defect 1 protein OS=Homo sapiens OX=9606 GN=MPDU1 PE=1 SV=2	MPDU1	247	MPU1_HUMAN	O75352-2	1	0.999	2	4
P04062	P04062 GLCM_HUMAN Lysosomal acid glucosylceramidase OS=Homo sapiens OX=9606 GN=GBA PE=1 SV=3	GBA	536	GLCM_HUMAN	P04062-2, P04062-4	1	0.999	7	4
P43155	P43155 CACP_HUMAN Carnitine O-acetyltransferase OS=Homo sapiens OX=9606 GN=CRAT PE=1 SV=5	CRAT	626	CACP_HUMAN	P43155-2, P43155-3	1	0.999	6	4
P53680	P53680 AP2S1_HUMAN AP-2 complex subunit sigma OS=Homo sapiens OX=9606 GN=AP2S1 PE=1 SV=2	AP2S1	142	AP2S1_HUMAN		1	0.999	4	4
Q15904	Q15904 VAS1_HUMAN V-type proton ATPase subunit S1 OS=Homo sapiens OX=9606 GN=ATP6AP1 PE=1 SV=2	ATP6AP1	470	VAS1_HUMAN		1	0.999	5	4
Q9NZ32	Q9NZ32 ARP10_HUMAN Actin-related protein 10 OS=Homo sapiens OX=9606 GN=ACTR10 PE=1 SV=1	ACTR10	417	ARP10_HUMAN		1	0.999	7	4
Q9UKM9	Q9UKM9 RALY_HUMAN RNA-binding protein Raly OS=Homo sapiens OX=9606 GN=RALY PE=1 SV=1	RALY	306	RALY_HUMAN		1	0.999	5	4
Q9Y314	Q9Y314 NOSIP_HUMAN Nitric oxide synthase-interacting protein OS=Homo sapiens OX=9606 GN=NOSIP PE=1 SV=1	NOSIP	301	NOSIP_HUMAN		1	0.999	4	4
O75962	O75962 TRIO_HUMAN Triple functional domain protein OS=Homo sapiens OX=9606 GN=TRIO PE=1 SV=2	TRIO	3097	TRIO_HUMAN	O75962-2, O75962-4	1	0.999	6	4
P48637	P48637 GSHB_HUMAN Glutathione synthetase OS=Homo sapiens OX=9606 GN=GSS PE=1 SV=1	GSS	474	GSHB_HUMAN		1	0.999	8	4
Q13362-4	Q13362-4 2A5G_HUMAN Isoform 4 of Serine/threonine-protein phosphatase 2A 56 kDa regulatory subunit gamma isoform OS=Homo sapiens OX=9606 GN=PPP2R5C	PPP2R5C	540	2A5G_HUMAN		1	0.999	9	4
Q8N6H7	Q8N6H7 ARFG2_HUMAN ADP-ribosylation factor GTPase-activating protein 2 OS=Homo sapiens OX=9606 GN=ARFGAP2 PE=1 SV=1	ARFGAP2	521	ARFG2_HUMAN		1	0.999	5	4
Q9NXV2	Q9NXV2 KCTD5_HUMAN BTB/POZ domain-containing protein KCTD5 OS=Homo sapiens OX=9606 GN=KCTD5 PE=1 SV=1	KCTD5	234	KCTD5_HUMAN		1	0.999	4	4
Q9UGV2	Q9UGV2 NDRG3_HUMAN Protein NDRG3 OS=Homo sapiens OX=9606 GN=NDRG3 PE=1 SV=2	NDRG3	375	NDRG3_HUMAN	Q9UGV2-2	1	0.999	5	4
Q9Y5K8	Q9Y5K8 VATD_HUMAN V-type proton ATPase subunit D OS=Homo sapiens OX=9606 GN=ATP6V1D PE=1 SV=1	ATP6V1D	247	VATD_HUMAN		1	0.999	6	4
O15321	O15321 TM9S1_HUMAN Transmembrane 9 superfamily member 1 OS=Homo sapiens OX=9606 GN=TM9SF1 PE=2 SV=2	TM9SF1	606	TM9S1_HUMAN	O15321-2	1	0.999	6	4
O43920	O43920 NDUS5_HUMAN NADH dehydrogenase [ubiquinone] iron-sulfur protein 5 OS=Homo sapiens OX=9606 GN=NDUFS5 PE=1 SV=3	NDUFS5	106	NDUS5_HUMAN		1	0.999	3	4
O95816	O95816 BAG2_HUMAN BAG family molecular chaperone regulator 2 OS=Homo sapiens OX=9606 GN=BAG2 PE=1 SV=1	BAG2	211	BAG2_HUMAN		1	0.999	6	4
P16989	P16989 YBOX3_HUMAN Y-box-binding protein 3 OS=Homo sapiens OX=9606 GN=YBX3 PE=1 SV=4	YBX3	372	YBOX3_HUMAN	P16989-2	1	0.999	10	4
Q9NRY5	Q9NRY5 F1142_HUMAN Protein FAM114A2 OS=Homo sapiens OX=9606 GN=FAM114A2 PE=1 SV=4	FAM114A2	505	F1142_HUMAN		1	0.999	4	4
O95070	O95070 YIF1A_HUMAN Protein YIF1A OS=Homo sapiens OX=9606 GN=YIF1A PE=1 SV=2	YIF1A	293	YIF1A_HUMAN		1	0.999	2	4
P04049	P04049 RAF1_HUMAN RAF proto-oncogene serine/threonine-protein kinase OS=Homo sapiens OX=9606 GN=RAF1 PE=1 SV=1	RAF1	648	RAF1_HUMAN	P04049-2	1	0.999	6	4
P35269	P35269 T2FA_HUMAN General transcription factor IIF subunit 1 OS=Homo sapiens OX=9606 GN=GTF2F1 PE=1 SV=2	GTF2F1	517	T2FA_HUMAN		1	0.999	3	4
Q92896	Q92896 GSLG1_HUMAN Golgi apparatus protein 1 OS=Homo sapiens OX=9606 GN=GLG1 PE=1 SV=2	GLG1	1179	GSLG1_HUMAN	Q92896-2, Q92896-3	1	0.999	4	4
Q9BRQ6	Q9BRQ6 MIC25_HUMAN MICOS complex subunit MIC25 OS=Homo sapiens OX=9606 GN=CHCHD6 PE=1 SV=1	CHCHD6	235	MIC25_HUMAN		1	0.999	6	4
O43674	O43674 NDUB5_HUMAN NADH dehydrogenase [ubiquinone] 1 beta subcomplex subunit 5, mitochondrial OS=Homo sapiens OX=9606 GN=NDUFB5 PE=1 SV=1	NDUFB5	189	NDUB5_HUMAN		1	0.999	3	4
P23919	P23919 KTHY_HUMAN Thymidylate kinase OS=Homo sapiens OX=9606 GN=DTYMK PE=1 SV=4	DTYMK	212	KTHY_HUMAN		1	0.999	6	4
P50750	P50750 CDK9_HUMAN Cyclin-dependent kinase 9 OS=Homo sapiens OX=9606 GN=CDK9 PE=1 SV=3	CDK9	372	CDK9_HUMAN	P50750-2	1	0.999	5	4
P86790	P86790 CCZ1B_HUMAN Vacuolar fusion protein CCZ1 homolog B OS=Homo sapiens OX=9606 GN=CCZ1B PE=1 SV=1	CCZ1B	482	CCZ1B_HUMAN	P86791	1	0.999	7	4
Q01085	Q01085 TIAR_HUMAN Nucleolysin TIAR OS=Homo sapiens OX=9606 GN=TIAL1 PE=1 SV=1	TIAL1	375	TIAR_HUMAN	Q01085-2	1	0.999	5	4
Q13049	Q13049 TRI32_HUMAN E3 ubiquitin-protein ligase TRIM32 OS=Homo sapiens OX=9606 GN=TRIM32 PE=1 SV=2	TRIM32	653	TRI32_HUMAN		1	0.999	3	4
Q7L9L4	Q7L9L4 MOB1B_HUMAN MOB kinase activator 1B OS=Homo sapiens OX=9606 GN=MOB1B PE=1 SV=3	MOB1B	216	MOB1B_HUMAN	Q7L9L4-2, Q9H8S9	1	0.999	4	4
Q86VR2	Q86VR2 RETR3_HUMAN Reticulophagy regulator 3 OS=Homo sapiens OX=9606 GN=RETREG3 PE=1 SV=1	RETREG3	466	RETR3_HUMAN		1	0.999	3	4
Q8NEW0	Q8NEW0 ZNT7_HUMAN Zinc transporter 7 OS=Homo sapiens OX=9606 GN=SLC30A7 PE=2 SV=1	SLC30A7	376	ZNT7_HUMAN		1	0.999	3	4
Q9P2W9	Q9P2W9 STX18_HUMAN Syntaxin-18 OS=Homo sapiens OX=9606 GN=STX18 PE=1 SV=1	STX18	335	STX18_HUMAN		1	0.999	3	4
Q9UH65	Q9UH65 SWP70_HUMAN Switch-associated protein 70 OS=Homo sapiens OX=9606 GN=SWAP70 PE=1 SV=1	SWAP70	585	SWP70_HUMAN		1	0.999	4	4
A6NDU8	A6NDU8 CE051_HUMAN UPF0600 protein C5orf51 OS=Homo sapiens OX=9606 GN=C5orf51 PE=1 SV=1	C5orf51	294	CE051_HUMAN		0.9999	0.999	2	4
O14908	O14908 GIPC1_HUMAN PDZ domain-containing protein GIPC1 OS=Homo sapiens OX=9606 GN=GIPC1 PE=1 SV=2	GIPC1	333	GIPC1_HUMAN		1	0.999	4	4
P29372	P29372 3MG_HUMAN DNA-3-methyladenine glycosylase OS=Homo sapiens OX=9606 GN=MPG PE=1 SV=3	MPG	298	3MG_HUMAN	P29372-2, P29372-4, P29372-5	1	0.999	2	4
Q3MHD2	Q3MHD2 LSM12_HUMAN Protein LSM12 homolog OS=Homo sapiens OX=9606 GN=LSM12 PE=1 SV=2	LSM12	195	LSM12_HUMAN	Q3MHD2-2	1	0.999	2	4
Q9BZK3	Q9BZK3 NACP4_HUMAN Putative nascent polypeptide-associated complex subunit alpha-like protein OS=Homo sapiens OX=9606 GN=NACA4P PE=5 SV=1	NACA4P	213	NACP4_HUMAN		0.9945	0.999	3	4
Q9H061	Q9H061 T126A_HUMAN Transmembrane protein 126A OS=Homo sapiens OX=9606 GN=TMEM126A PE=1 SV=1	TMEM126A	195	T126A_HUMAN		1	0.999	3	4
Q9UNE7	Q9UNE7 CHIP_HUMAN E3 ubiquitin-protein ligase CHIP OS=Homo sapiens OX=9606 GN=STUB1 PE=1 SV=2	STUB1	303	CHIP_HUMAN		1	0.999	4	4
Q9Y385	Q9Y385 UB2J1_HUMAN Ubiquitin-conjugating enzyme E2 J1 OS=Homo sapiens OX=9606 GN=UBE2J1 PE=1 SV=2	UBE2J1	318	UB2J1_HUMAN		1	0.999	3	4
P16455	P16455 MGMT_HUMAN Methylated-DNA--protein-cysteine methyltransferase OS=Homo sapiens OX=9606 GN=MGMT PE=1 SV=1	MGMT	207	MGMT_HUMAN		1	0.999	3	4
P41223	P41223 BUD31_HUMAN Protein BUD31 homolog OS=Homo sapiens OX=9606 GN=BUD31 PE=1 SV=2	BUD31	144	BUD31_HUMAN	P41223-2	1	0.999	4	4
Q8NCH0	Q8NCH0 CHSTE_HUMAN Carbohydrate sulfotransferase 14 OS=Homo sapiens OX=9606 GN=CHST14 PE=1 SV=2	CHST14	376	CHSTE_HUMAN		1	0.999	4	4
Q96PZ0	Q96PZ0 PUS7_HUMAN Pseudouridylate synthase 7 homolog OS=Homo sapiens OX=9606 GN=PUS7 PE=1 SV=2	PUS7	661	PUS7_HUMAN	Q96PZ0-2	1	0.999	3	4
Q9Y383	Q9Y383 LC7L2_HUMAN Putative RNA-binding protein Luc7-like 2 OS=Homo sapiens OX=9606 GN=LUC7L2 PE=1 SV=2	LUC7L2	392	LC7L2_HUMAN		1	0.999	14	4
O43752	O43752 STX6_HUMAN Syntaxin-6 OS=Homo sapiens OX=9606 GN=STX6 PE=1 SV=1	STX6	255	STX6_HUMAN		1	0.999	2	4
Q14746	Q14746 COG2_HUMAN Conserved oligomeric Golgi complex subunit 2 OS=Homo sapiens OX=9606 GN=COG2 PE=1 SV=1	COG2	738	COG2_HUMAN	Q14746-2	1	0.999	3	4
Q15054	Q15054 DPOD3_HUMAN DNA polymerase delta subunit 3 OS=Homo sapiens OX=9606 GN=POLD3 PE=1 SV=2	POLD3	466	DPOD3_HUMAN		1	0.999	4	4
Q86TU7	Q86TU7 SETD3_HUMAN Actin-histidine N-methyltransferase OS=Homo sapiens OX=9606 GN=SETD3 PE=1 SV=1	SETD3	594	SETD3_HUMAN		1	0.999	2	4
Q8IYS2	Q8IYS2 K2013_HUMAN Uncharacterized protein KIAA2013 OS=Homo sapiens OX=9606 GN=KIAA2013 PE=1 SV=1	KIAA2013	634	K2013_HUMAN	Q8IYS2-2	0.9999	0.999	2	4
Q8NBT2	Q8NBT2 SPC24_HUMAN Kinetochore protein Spc24 OS=Homo sapiens OX=9606 GN=SPC24 PE=1 SV=2	SPC24	197	SPC24_HUMAN		1	0.999	2	4
Q9UBC2	Q9UBC2 EP15R_HUMAN Epidermal growth factor receptor substrate 15-like 1 OS=Homo sapiens OX=9606 GN=EPS15L1 PE=1 SV=1	EPS15L1	864	EP15R_HUMAN	Q9UBC2-2, Q9UBC2-3	1	0.999	2	4
P29966	P29966 MARCS_HUMAN Myristoylated alanine-rich C-kinase substrate OS=Homo sapiens OX=9606 GN=MARCKS PE=1 SV=4	MARCKS	332	MARCS_HUMAN		1	0.999	7	3
A0AVT1	A0AVT1 UBA6_HUMAN Ubiquitin-like modifier-activating enzyme 6 OS=Homo sapiens OX=9606 GN=UBA6 PE=1 SV=1	UBA6	1052	UBA6_HUMAN		1	0.999	14	3
Q8TF42	Q8TF42 UBS3B_HUMAN Ubiquitin-associated and SH3 domain-containing protein B OS=Homo sapiens OX=9606 GN=UBASH3B PE=1 SV=2	UBASH3B	649	UBS3B_HUMAN		1	0.999	11	3
Q9H223	Q9H223 EHD4_HUMAN EH domain-containing protein 4 OS=Homo sapiens OX=9606 GN=EHD4 PE=1 SV=1	EHD4	541	EHD4_HUMAN		1	0.999	13	3
O00712-4	O00712-4 NFIB_HUMAN Isoform 4 of Nuclear factor 1 B-type OS=Homo sapiens OX=9606 GN=NFIB	NFIB	471	NFIB_HUMAN		1	0.999	10	3
P49756	P49756 RBM25_HUMAN RNA-binding protein 25 OS=Homo sapiens OX=9606 GN=RBM25 PE=1 SV=3	RBM25	843	RBM25_HUMAN		1	0.999	10	3
Q9Y4Z0	Q9Y4Z0 LSM4_HUMAN U6 snRNA-associated Sm-like protein LSm4 OS=Homo sapiens OX=9606 GN=LSM4 PE=1 SV=1	LSM4	139	LSM4_HUMAN		1	0.999	4	3
Q15386	Q15386 UBE3C_HUMAN Ubiquitin-protein ligase E3C OS=Homo sapiens OX=9606 GN=UBE3C PE=1 SV=3	UBE3C	1083	UBE3C_HUMAN		1	0.999	9	3
O95881	O95881 TXD12_HUMAN Thioredoxin domain-containing protein 12 OS=Homo sapiens OX=9606 GN=TXNDC12 PE=1 SV=1	TXNDC12	172	TXD12_HUMAN		1	0.999	4	3
P62995	P62995 TRA2B_HUMAN Transformer-2 protein homolog beta OS=Homo sapiens OX=9606 GN=TRA2B PE=1 SV=1	TRA2B	288	TRA2B_HUMAN	P62995-3	1	0.999	7	3
Q86UE4	Q86UE4 LYRIC_HUMAN Protein LYRIC OS=Homo sapiens OX=9606 GN=MTDH PE=1 SV=2	MTDH	582	LYRIC_HUMAN		1	0.999	6	3
P0CG29	P0CG29 GST2_HUMAN Glutathione S-transferase theta-2 OS=Homo sapiens OX=9606 GN=GSTT2 PE=1 SV=1	GSTT2	244	GST2_HUMAN	P0CG30	1	0.999	3	3
O95372	O95372 LYPA2_HUMAN Acyl-protein thioesterase 2 OS=Homo sapiens OX=9606 GN=LYPLA2 PE=1 SV=1	LYPLA2	231	LYPA2_HUMAN		1	0.999	3	3
P35270	P35270 SPRE_HUMAN Sepiapterin reductase OS=Homo sapiens OX=9606 GN=SPR PE=1 SV=1	SPR	261	SPRE_HUMAN		1	0.999	5	3
P56385	P56385 ATP5I_HUMAN ATP synthase subunit e, mitochondrial OS=Homo sapiens OX=9606 GN=ATP5ME PE=1 SV=2	ATP5ME	69	ATP5I_HUMAN		1	0.999	3	3
Q7Z7K6	Q7Z7K6 CENPV_HUMAN Centromere protein V OS=Homo sapiens OX=9606 GN=CENPV PE=1 SV=1	CENPV	275	CENPV_HUMAN	Q7Z7K6-3	1	0.999	4	3
Q96RF0	Q96RF0 SNX18_HUMAN Sorting nexin-18 OS=Homo sapiens OX=9606 GN=SNX18 PE=1 SV=2	SNX18	628	SNX18_HUMAN	Q96RF0-2, Q96RF0-3	1	0.999	6	3
O75828	O75828 CBR3_HUMAN Carbonyl reductase [NADPH] 3 OS=Homo sapiens OX=9606 GN=CBR3 PE=1 SV=3	CBR3	277	CBR3_HUMAN		1	0.999	8	3
Q9NY93	Q9NY93 DDX56_HUMAN Probable ATP-dependent RNA helicase DDX56 OS=Homo sapiens OX=9606 GN=DDX56 PE=1 SV=1	DDX56	547	DDX56_HUMAN	Q9NY93-2	1	0.999	6	3
Q9UN37	Q9UN37 VPS4A_HUMAN Vacuolar protein sorting-associated protein 4A OS=Homo sapiens OX=9606 GN=VPS4A PE=1 SV=1	VPS4A	437	VPS4A_HUMAN		1	0.999	7	3
Q14118	Q14118 DAG1_HUMAN Dystroglycan OS=Homo sapiens OX=9606 GN=DAG1 PE=1 SV=2	DAG1	895	DAG1_HUMAN		1	0.999	6	3
O96005	O96005 CLPT1_HUMAN Cleft lip and palate transmembrane protein 1 OS=Homo sapiens OX=9606 GN=CLPTM1 PE=1 SV=1	CLPTM1	669	CLPT1_HUMAN	O96005-3, O96005-4	1	0.999	6	3
Q05639	Q05639 EF1A2_HUMAN Elongation factor 1-alpha 2 OS=Homo sapiens OX=9606 GN=EEF1A2 PE=1 SV=1	EEF1A2	463	EF1A2_HUMAN		1	0.999	16	3
Q08AM6	Q08AM6 VAC14_HUMAN Protein VAC14 homolog OS=Homo sapiens OX=9606 GN=VAC14 PE=1 SV=1	VAC14	782	VAC14_HUMAN		1	0.999	4	3
Q96MW5	Q96MW5 COG8_HUMAN Conserved oligomeric Golgi complex subunit 8 OS=Homo sapiens OX=9606 GN=COG8 PE=1 SV=2	COG8	612	COG8_HUMAN		1	0.999	4	3
O43583	O43583 DENR_HUMAN Density-regulated protein OS=Homo sapiens OX=9606 GN=DENR PE=1 SV=2	DENR	198	DENR_HUMAN		1	0.999	2	3
P45985	P45985 MP2K4_HUMAN Dual specificity mitogen-activated protein kinase kinase 4 OS=Homo sapiens OX=9606 GN=MAP2K4 PE=1 SV=1	MAP2K4	399	MP2K4_HUMAN	P45985-2	1	0.999	3	3
Q6NUQ1	Q6NUQ1 RINT1_HUMAN RAD50-interacting protein 1 OS=Homo sapiens OX=9606 GN=RINT1 PE=1 SV=1	RINT1	792	RINT1_HUMAN		1	0.999	4	3
Q92522	Q92522 H1X_HUMAN Histone H1x OS=Homo sapiens OX=9606 GN=H1FX PE=1 SV=1	H1FX	213	H1X_HUMAN		1	0.999	3	3
Q93052	Q93052 LPP_HUMAN Lipoma-preferred partner OS=Homo sapiens OX=9606 GN=LPP PE=1 SV=1	LPP	612	LPP_HUMAN		1	0.999	5	3
Q99653	Q99653 CHP1_HUMAN Calcineurin B homologous protein 1 OS=Homo sapiens OX=9606 GN=CHP1 PE=1 SV=3	CHP1	195	CHP1_HUMAN		1	0.999	4	3
Q9BQ70	Q9BQ70 TCF25_HUMAN Transcription factor 25 OS=Homo sapiens OX=9606 GN=TCF25 PE=1 SV=1	TCF25	676	TCF25_HUMAN		1	0.9988	4	3
Q9Y6A9	Q9Y6A9 SPCS1_HUMAN Signal peptidase complex subunit 1 OS=Homo sapiens OX=9606 GN=SPCS1 PE=1 SV=4	SPCS1	102	SPCS1_HUMAN		1	0.999	3	3
O15533	O15533 TPSN_HUMAN Tapasin OS=Homo sapiens OX=9606 GN=TAPBP PE=1 SV=1	TAPBP	448	TPSN_HUMAN	O15533-2, O15533-3	1	0.999	3	3
Q14344	Q14344 GNA13_HUMAN Guanine nucleotide-binding protein subunit alpha-13 OS=Homo sapiens OX=9606 GN=GNA13 PE=1 SV=2	GNA13	377	GNA13_HUMAN	Q14344-2	1	0.999	5	3
Q5JPH6	Q5JPH6 SYEM_HUMAN Probable glutamate--tRNA ligase, mitochondrial OS=Homo sapiens OX=9606 GN=EARS2 PE=1 SV=2	EARS2	523	SYEM_HUMAN		1	0.999	4	3
Q86Y82	Q86Y82 STX12_HUMAN Syntaxin-12 OS=Homo sapiens OX=9606 GN=STX12 PE=1 SV=1	STX12	276	STX12_HUMAN		1	0.999	4	3
Q8IXI1	Q8IXI1 MIRO2_HUMAN Mitochondrial Rho GTPase 2 OS=Homo sapiens OX=9606 GN=RHOT2 PE=1 SV=2	RHOT2	618	MIRO2_HUMAN		1	0.999	4	3
Q96ME1-4	Q96ME1-4 FXL18_HUMAN Isoform 4 of F-box/LRR-repeat protein 18 OS=Homo sapiens OX=9606 GN=FBXL18	FBXL18	718	FXL18_HUMAN		1	0.999	3	3
O00193	O00193 SMAP_HUMAN Small acidic protein OS=Homo sapiens OX=9606 GN=SMAP PE=1 SV=1	SMAP	183	SMAP_HUMAN		0.9308	0.999	1	3
O14530	O14530 TXND9_HUMAN Thioredoxin domain-containing protein 9 OS=Homo sapiens OX=9606 GN=TXNDC9 PE=1 SV=2	TXNDC9	226	TXND9_HUMAN	O14530-2	1	0.999	3	3
O60547	O60547 GMDS_HUMAN GDP-mannose 4,6 dehydratase OS=Homo sapiens OX=9606 GN=GMDS PE=1 SV=1	GMDS	372	GMDS_HUMAN	O60547-2	1	0.999	4	3
P00167	P00167 CYB5_HUMAN Cytochrome b5 OS=Homo sapiens OX=9606 GN=CYB5A PE=1 SV=2	CYB5A	134	CYB5_HUMAN	P00167-2, P00167-3	1	0.999	2	3
P22090	P22090 RS4Y1_HUMAN 40S ribosomal protein S4, Y isoform 1 OS=Homo sapiens OX=9606 GN=RPS4Y1 PE=1 SV=2	RPS4Y1	263	RS4Y1_HUMAN		1	0.999	13	3
P49137	P49137 MAPK2_HUMAN MAP kinase-activated protein kinase 2 OS=Homo sapiens OX=9606 GN=MAPKAPK2 PE=1 SV=1	MAPKAPK2	400	MAPK2_HUMAN	P49137-2	1	0.999	2	3
P49427	P49427 UB2R1_HUMAN Ubiquitin-conjugating enzyme E2 R1 OS=Homo sapiens OX=9606 GN=CDC34 PE=1 SV=2	CDC34	236	UB2R1_HUMAN		1	0.999	4	3
P50749	P50749 RASF2_HUMAN Ras association domain-containing protein 2 OS=Homo sapiens OX=9606 GN=RASSF2 PE=1 SV=1	RASSF2	326	RASF2_HUMAN		1	0.999	2	3
P61966	P61966 AP1S1_HUMAN AP-1 complex subunit sigma-1A OS=Homo sapiens OX=9606 GN=AP1S1 PE=1 SV=1	AP1S1	158	AP1S1_HUMAN		1	0.999	4	3
Q15813	Q15813 TBCE_HUMAN Tubulin-specific chaperone E OS=Homo sapiens OX=9606 GN=TBCE PE=1 SV=1	TBCE	527	TBCE_HUMAN	Q15813-2	1	0.999	3	3
Q4G0N4	Q4G0N4 NAKD2_HUMAN NAD kinase 2, mitochondrial OS=Homo sapiens OX=9606 GN=NADK2 PE=1 SV=2	NADK2	442	NAKD2_HUMAN		1	0.999	4	3
Q9UHQ4	Q9UHQ4 BAP29_HUMAN B-cell receptor-associated protein 29 OS=Homo sapiens OX=9606 GN=BCAP29 PE=1 SV=2	BCAP29	241	BAP29_HUMAN		1	0.9989	5	3
Q9Y248	Q9Y248 PSF2_HUMAN DNA replication complex GINS protein PSF2 OS=Homo sapiens OX=9606 GN=GINS2 PE=1 SV=1	GINS2	185	PSF2_HUMAN		1	0.999	2	3
Q9Y3C8	Q9Y3C8 UFC1_HUMAN Ubiquitin-fold modifier-conjugating enzyme 1 OS=Homo sapiens OX=9606 GN=UFC1 PE=1 SV=3	UFC1	167	UFC1_HUMAN		1	0.999	3	3
Q9Y3E0	Q9Y3E0 GOT1B_HUMAN Vesicle transport protein GOT1B OS=Homo sapiens OX=9606 GN=GOLT1B PE=1 SV=1	GOLT1B	138	GOT1B_HUMAN		1	0.999	2	3
P04183	P04183 KITH_HUMAN Thymidine kinase, cytosolic OS=Homo sapiens OX=9606 GN=TK1 PE=1 SV=2	TK1	234	KITH_HUMAN		0.9966	0.9985	2	3
P13807	P13807 GYS1_HUMAN Glycogen [starch] synthase, muscle OS=Homo sapiens OX=9606 GN=GYS1 PE=1 SV=2	GYS1	737	GYS1_HUMAN	P13807-2	1	0.999	3	3
P23610	P23610 F8I2_HUMAN Factor VIII intron 22 protein OS=Homo sapiens OX=9606 GN=F8A1 PE=1 SV=2	F8A1	371	F8I2_HUMAN		1	0.999	2	3
P43007	P43007 SATT_HUMAN Neutral amino acid transporter A OS=Homo sapiens OX=9606 GN=SLC1A4 PE=1 SV=1	SLC1A4	532	SATT_HUMAN		1	0.9989	2	3
Q05932	Q05932 FOLC_HUMAN Folylpolyglutamate synthase, mitochondrial OS=Homo sapiens OX=9606 GN=FPGS PE=1 SV=3	FPGS	587	FOLC_HUMAN	Q05932-2, Q05932-3, Q05932-4	1	0.999	2	3
Q8NCA5	Q8NCA5 FA98A_HUMAN Protein FAM98A OS=Homo sapiens OX=9606 GN=FAM98A PE=1 SV=1	FAM98A	519	FA98A_HUMAN	Q8NCA5-2	1	0.999	5	3
Q92890	Q92890 UFD1_HUMAN Ubiquitin recognition factor in ER-associated degradation protein 1 OS=Homo sapiens OX=9606 GN=UFD1 PE=1 SV=3	UFD1	307	UFD1_HUMAN	Q92890-1	1	0.999	4	3
Q9BSF4	Q9BSF4 TIM29_HUMAN Mitochondrial import inner membrane translocase subunit Tim29 OS=Homo sapiens OX=9606 GN=TIMM29 PE=1 SV=2	TIMM29	260	TIM29_HUMAN		1	0.999	3	3
Q9BZJ0	Q9BZJ0 CRNL1_HUMAN Crooked neck-like protein 1 OS=Homo sapiens OX=9606 GN=CRNKL1 PE=1 SV=4	CRNKL1	848	CRNL1_HUMAN	Q9BZJ0-2, Q9BZJ0-3	1	0.999	4	3
Q9H9P8	Q9H9P8 L2HDH_HUMAN L-2-hydroxyglutarate dehydrogenase, mitochondrial OS=Homo sapiens OX=9606 GN=L2HGDH PE=1 SV=3	L2HGDH	463	L2HDH_HUMAN		1	0.999	4	3
Q9NT62	Q9NT62 ATG3_HUMAN Ubiquitin-like-conjugating enzyme ATG3 OS=Homo sapiens OX=9606 GN=ATG3 PE=1 SV=1	ATG3	314	ATG3_HUMAN		1	0.999	3	3
Q9P0V9	Q9P0V9 SEP10_HUMAN Septin-10 OS=Homo sapiens OX=9606 GN=SEPT10 PE=1 SV=2	44814	454	SEP10_HUMAN	Q9P0V9-2	1	0.999	5	3
Q9UKZ1	Q9UKZ1 CNO11_HUMAN CCR4-NOT transcription complex subunit 11 OS=Homo sapiens OX=9606 GN=CNOT11 PE=1 SV=1	CNOT11	510	CNO11_HUMAN		1	0.999	2	3
Q9Y2U8	Q9Y2U8 MAN1_HUMAN Inner nuclear membrane protein Man1 OS=Homo sapiens OX=9606 GN=LEMD3 PE=1 SV=2	LEMD3	911	MAN1_HUMAN		1	0.999	3	3
O43294	O43294 TGFI1_HUMAN Transforming growth factor beta-1-induced transcript 1 protein OS=Homo sapiens OX=9606 GN=TGFB1I1 PE=1 SV=2	TGFB1I1	461	TGFI1_HUMAN	O43294-2	1	0.999	4	3
O75879	O75879 GATB_HUMAN Glutamyl-tRNA(Gln) amidotransferase subunit B, mitochondrial OS=Homo sapiens OX=9606 GN=GATB PE=1 SV=1	GATB	557	GATB_HUMAN		1	0.999	3	3
P10109	P10109 ADX_HUMAN Adrenodoxin, mitochondrial OS=Homo sapiens OX=9606 GN=FDX1 PE=1 SV=1	FDX1	184	ADX_HUMAN		1	0.999	3	3
P16333	P16333 NCK1_HUMAN Cytoplasmic protein NCK1 OS=Homo sapiens OX=9606 GN=NCK1 PE=1 SV=1	NCK1	377	NCK1_HUMAN	P16333-2	1	0.999	3	3
Q15035	Q15035 TRAM2_HUMAN Translocating chain-associated membrane protein 2 OS=Homo sapiens OX=9606 GN=TRAM2 PE=1 SV=1	TRAM2	370	TRAM2_HUMAN		1	0.999	2	3
Q3LXA3	Q3LXA3 TKFC_HUMAN Triokinase/FMN cyclase OS=Homo sapiens OX=9606 GN=TKFC PE=1 SV=2	TKFC	575	TKFC_HUMAN		1	0.999	2	3
Q6IAA8	Q6IAA8 LTOR1_HUMAN Ragulator complex protein LAMTOR1 OS=Homo sapiens OX=9606 GN=LAMTOR1 PE=1 SV=2	LAMTOR1	161	LTOR1_HUMAN		1	0.999	2	3
Q8TAG9	Q8TAG9 EXOC6_HUMAN Exocyst complex component 6 OS=Homo sapiens OX=9606 GN=EXOC6 PE=1 SV=3	EXOC6	804	EXOC6_HUMAN		1	0.999	2	3
Q96DZ1	Q96DZ1 ERLEC_HUMAN Endoplasmic reticulum lectin 1 OS=Homo sapiens OX=9606 GN=ERLEC1 PE=1 SV=1	ERLEC1	483	ERLEC_HUMAN	Q96DZ1-3	1	0.999	2	3
Q9UKY7	Q9UKY7 CDV3_HUMAN Protein CDV3 homolog OS=Homo sapiens OX=9606 GN=CDV3 PE=1 SV=1	CDV3	258	CDV3_HUMAN		1	0.999	3	3
Q9UL15	Q9UL15 BAG5_HUMAN BAG family molecular chaperone regulator 5 OS=Homo sapiens OX=9606 GN=BAG5 PE=1 SV=1	BAG5	447	BAG5_HUMAN	Q9UL15-2	1	0.999	4	3
O00488	O00488 ZN593_HUMAN Zinc finger protein 593 OS=Homo sapiens OX=9606 GN=ZNF593 PE=1 SV=2	ZNF593	134	ZN593_HUMAN		0.9995	0.9978	2	3
O15254	O15254 ACOX3_HUMAN Peroxisomal acyl-coenzyme A oxidase 3 OS=Homo sapiens OX=9606 GN=ACOX3 PE=1 SV=2	ACOX3	700	ACOX3_HUMAN		1	0.999	2	3
O95166	O95166 GBRAP_HUMAN Gamma-aminobutyric acid receptor-associated protein OS=Homo sapiens OX=9606 GN=GABARAP PE=1 SV=1	GABARAP	117	GBRAP_HUMAN		0.9995	0.999	2	3
P09496	P09496 CLCA_HUMAN Clathrin light chain A OS=Homo sapiens OX=9606 GN=CLTA PE=1 SV=1	CLTA	248	CLCA_HUMAN	P09496-3	1	0.999	2	3
Q15013	Q15013 MD2BP_HUMAN MAD2L1-binding protein OS=Homo sapiens OX=9606 GN=MAD2L1BP PE=1 SV=1	MAD2L1BP	274	MD2BP_HUMAN		0.9801	0.999	1	3
Q68E01	Q68E01 INT3_HUMAN Integrator complex subunit 3 OS=Homo sapiens OX=9606 GN=INTS3 PE=1 SV=1	INTS3	1043	INT3_HUMAN	Q68E01-2, Q68E01-3	1	0.999	3	3
Q7Z6B0	Q7Z6B0 CCD91_HUMAN Coiled-coil domain-containing protein 91 OS=Homo sapiens OX=9606 GN=CCDC91 PE=1 SV=2	CCDC91	441	CCD91_HUMAN	Q7Z6B0-2	0.9949	0.999	2	3
Q86V48	Q86V48 LUZP1_HUMAN Leucine zipper protein 1 OS=Homo sapiens OX=9606 GN=LUZP1 PE=1 SV=2	LUZP1	1076	LUZP1_HUMAN	Q86V48-2, Q86V48-3	0.9998	0.999	2	3
Q8N511	Q8N511 TM199_HUMAN Transmembrane protein 199 OS=Homo sapiens OX=9606 GN=TMEM199 PE=1 SV=1	TMEM199	208	TM199_HUMAN		0.9304	0.999	1	3
Q96D53	Q96D53 COQ8B_HUMAN Atypical kinase COQ8B, mitochondrial OS=Homo sapiens OX=9606 GN=COQ8B PE=1 SV=2	COQ8B	544	COQ8B_HUMAN	Q96D53-2	1	0.999	2	3
Q9BSG0	Q9BSG0 PADC1_HUMAN Protease-associated domain-containing protein 1 OS=Homo sapiens OX=9606 GN=PRADC1 PE=1 SV=1	PRADC1	188	PADC1_HUMAN		0.9303	0.999	1	3
Q9C004	Q9C004 SPY4_HUMAN Protein sprouty homolog 4 OS=Homo sapiens OX=9606 GN=SPRY4 PE=1 SV=2	SPRY4	299	SPY4_HUMAN		0.991	0.9931	2	3
Q9C037	Q9C037 TRIM4_HUMAN E3 ubiquitin-protein ligase TRIM4 OS=Homo sapiens OX=9606 GN=TRIM4 PE=1 SV=2	TRIM4	500	TRIM4_HUMAN	Q9C037-2, Q9C037-3	1	0.999	3	3
Q9GZU8	Q9GZU8 PIP30_HUMAN PSME3-interacting protein OS=Homo sapiens OX=9606 GN=FAM192A PE=1 SV=1	FAM192A	254	PIP30_HUMAN		0.9999	0.9988	2	3
Q9HBU6	Q9HBU6 EKI1_HUMAN Ethanolamine kinase 1 OS=Homo sapiens OX=9606 GN=ETNK1 PE=1 SV=1	ETNK1	452	EKI1_HUMAN		1	0.999	3	3
Q9NVS9	Q9NVS9 PNPO_HUMAN Pyridoxine-5'-phosphate oxidase OS=Homo sapiens OX=9606 GN=PNPO PE=1 SV=1	PNPO	261	PNPO_HUMAN		1	0.999	3	3
Q9P0K1	Q9P0K1 ADA22_HUMAN Disintegrin and metalloproteinase domain-containing protein 22 OS=Homo sapiens OX=9606 GN=ADAM22 PE=1 SV=1	ADAM22	906	ADA22_HUMAN	Q9P0K1-2, Q9P0K1-3, Q9P0K1-4, Q9P0K1-5	1	0.999	3	3
Q9P2N5	Q9P2N5 RBM27_HUMAN RNA-binding protein 27 OS=Homo sapiens OX=9606 GN=RBM27 PE=1 SV=2	RBM27	1060	RBM27_HUMAN		0.9975	0.999	2	3
Q9Y5K5	Q9Y5K5 UCHL5_HUMAN Ubiquitin carboxyl-terminal hydrolase isozyme L5 OS=Homo sapiens OX=9606 GN=UCHL5 PE=1 SV=3	UCHL5	329	UCHL5_HUMAN	Q9Y5K5-2, Q9Y5K5-3, Q9Y5K5-4	1	0.999	3	3
O60341	O60341 KDM1A_HUMAN Lysine-specific histone demethylase 1A OS=Homo sapiens OX=9606 GN=KDM1A PE=1 SV=2	KDM1A	852	KDM1A_HUMAN	O60341-2	1	0.999	12	2
P29320	P29320 EPHA3_HUMAN Ephrin type-A receptor 3 OS=Homo sapiens OX=9606 GN=EPHA3 PE=1 SV=2	EPHA3	983	EPHA3_HUMAN		1	0.999	12	2
Q9BVC6	Q9BVC6 TM109_HUMAN Transmembrane protein 109 OS=Homo sapiens OX=9606 GN=TMEM109 PE=1 SV=1	TMEM109	243	TM109_HUMAN		1	0.999	2	2
P45973	P45973 CBX5_HUMAN Chromobox protein homolog 5 OS=Homo sapiens OX=9606 GN=CBX5 PE=1 SV=1	CBX5	191	CBX5_HUMAN		1	0.999	8	2
P37198	P37198 NUP62_HUMAN Nuclear pore glycoprotein p62 OS=Homo sapiens OX=9606 GN=NUP62 PE=1 SV=3	NUP62	522	NUP62_HUMAN		1	0.999	6	2
Q7L2J0	Q7L2J0 MEPCE_HUMAN 7SK snRNA methylphosphate capping enzyme OS=Homo sapiens OX=9606 GN=MEPCE PE=1 SV=1	MEPCE	689	MEPCE_HUMAN		1	0.999	8	2
Q02252	Q02252 MMSA_HUMAN Methylmalonate-semialdehyde dehydrogenase [acylating], mitochondrial OS=Homo sapiens OX=9606 GN=ALDH6A1 PE=1 SV=2	ALDH6A1	535	MMSA_HUMAN	Q02252-2	1	0.999	8	2
Q96GG9	Q96GG9 DCNL1_HUMAN DCN1-like protein 1 OS=Homo sapiens OX=9606 GN=DCUN1D1 PE=1 SV=1	DCUN1D1	259	DCNL1_HUMAN		1	0.999	5	2
Q9Y5Q9	Q9Y5Q9 TF3C3_HUMAN General transcription factor 3C polypeptide 3 OS=Homo sapiens OX=9606 GN=GTF3C3 PE=1 SV=1	GTF3C3	886	TF3C3_HUMAN		1	0.999	9	2
Q53FT3	Q53FT3 HIKES_HUMAN Protein Hikeshi OS=Homo sapiens OX=9606 GN=HIKESHI PE=1 SV=2	HIKESHI	197	HIKES_HUMAN		1	0.999	3	2
O14556	O14556 G3PT_HUMAN Glyceraldehyde-3-phosphate dehydrogenase, testis-specific OS=Homo sapiens OX=9606 GN=GAPDHS PE=1 SV=2	GAPDHS	408	G3PT_HUMAN		1	0.999	4	2
O60678	O60678 ANM3_HUMAN Protein arginine N-methyltransferase 3 OS=Homo sapiens OX=9606 GN=PRMT3 PE=1 SV=4	PRMT3	531	ANM3_HUMAN		1	0.999	6	2
Q08170	Q08170 SRSF4_HUMAN Serine/arginine-rich splicing factor 4 OS=Homo sapiens OX=9606 GN=SRSF4 PE=1 SV=2	SRSF4	494	SRSF4_HUMAN		1	0.999	3	2
Q14376	Q14376 GALE_HUMAN UDP-glucose 4-epimerase OS=Homo sapiens OX=9606 GN=GALE PE=1 SV=2	GALE	348	GALE_HUMAN		1	0.999	3	2
Q8IZ83	Q8IZ83 A16A1_HUMAN Aldehyde dehydrogenase family 16 member A1 OS=Homo sapiens OX=9606 GN=ALDH16A1 PE=1 SV=2	ALDH16A1	802	A16A1_HUMAN	Q8IZ83-3	1	0.999	7	2
Q92692-2	Q92692-2 NECT2_HUMAN Isoform Alpha of Nectin-2 OS=Homo sapiens OX=9606 GN=NECTIN2	NECTIN2	479	NECT2_HUMAN		1	0.999	6	2
Q9Y5X3	Q9Y5X3 SNX5_HUMAN Sorting nexin-5 OS=Homo sapiens OX=9606 GN=SNX5 PE=1 SV=1	SNX5	404	SNX5_HUMAN		1	0.999	6	2
O75880	O75880 SCO1_HUMAN Protein SCO1 homolog, mitochondrial OS=Homo sapiens OX=9606 GN=SCO1 PE=1 SV=1	SCO1	301	SCO1_HUMAN		1	0.999	6	2
P27361	P27361 MK03_HUMAN Mitogen-activated protein kinase 3 OS=Homo sapiens OX=9606 GN=MAPK3 PE=1 SV=4	MAPK3	379	MK03_HUMAN	P27361-3	1	0.999	12	2
P50613	P50613 CDK7_HUMAN Cyclin-dependent kinase 7 OS=Homo sapiens OX=9606 GN=CDK7 PE=1 SV=1	CDK7	346	CDK7_HUMAN		1	0.999	3	2
Q15843	Q15843 NEDD8_HUMAN NEDD8 OS=Homo sapiens OX=9606 GN=NEDD8 PE=1 SV=1	NEDD8	81	NEDD8_HUMAN		0.9308	0.999	1	2
Q6PJ69	Q6PJ69 TRI65_HUMAN Tripartite motif-containing protein 65 OS=Homo sapiens OX=9606 GN=TRIM65 PE=1 SV=3	TRIM65	517	TRI65_HUMAN		1	0.999	4	2
Q9NP97	Q9NP97 DLRB1_HUMAN Dynein light chain roadblock-type 1 OS=Homo sapiens OX=9606 GN=DYNLRB1 PE=1 SV=3	DYNLRB1	96	DLRB1_HUMAN		1	0.999	5	2
O15121	O15121 DEGS1_HUMAN Sphingolipid delta(4)-desaturase DES1 OS=Homo sapiens OX=9606 GN=DEGS1 PE=1 SV=1	DEGS1	323	DEGS1_HUMAN		1	0.999	2	2
O15382	O15382 BCAT2_HUMAN Branched-chain-amino-acid aminotransferase, mitochondrial OS=Homo sapiens OX=9606 GN=BCAT2 PE=1 SV=2	BCAT2	392	BCAT2_HUMAN		1	0.999	5	2
P36639	P36639 8ODP_HUMAN 7,8-dihydro-8-oxoguanine triphosphatase OS=Homo sapiens OX=9606 GN=NUDT1 PE=1 SV=3	NUDT1	197	8ODP_HUMAN	P36639-2, P36639-3, P36639-4	1	0.999	2	2
P51151	P51151 RAB9A_HUMAN Ras-related protein Rab-9A OS=Homo sapiens OX=9606 GN=RAB9A PE=1 SV=1	RAB9A	201	RAB9A_HUMAN		1	0.999	3	2
P54802	P54802 ANAG_HUMAN Alpha-N-acetylglucosaminidase OS=Homo sapiens OX=9606 GN=NAGLU PE=1 SV=2	NAGLU	743	ANAG_HUMAN		1	0.999	6	2
Q15345	Q15345 LRC41_HUMAN Leucine-rich repeat-containing protein 41 OS=Homo sapiens OX=9606 GN=LRRC41 PE=1 SV=3	LRRC41	812	LRC41_HUMAN		1	0.999	6	2
Q6Y288	Q6Y288 B3GLT_HUMAN Beta-1,3-glucosyltransferase OS=Homo sapiens OX=9606 GN=B3GLCT PE=1 SV=2	B3GLCT	498	B3GLT_HUMAN		1	0.999	2	2
O95059	O95059 RPP14_HUMAN Ribonuclease P protein subunit p14 OS=Homo sapiens OX=9606 GN=RPP14 PE=1 SV=3	RPP14	124	RPP14_HUMAN		0.9966	0.999	2	2
P18615-3	P18615-3 NELFE_HUMAN Isoform 2 of Negative elongation factor E OS=Homo sapiens OX=9606 GN=NELFE	NELFE	387	NELFE_HUMAN		1	0.999	4	2
P19022	P19022 CADH2_HUMAN Cadherin-2 OS=Homo sapiens OX=9606 GN=CDH2 PE=1 SV=4	CDH2	906	CADH2_HUMAN	P19022-2	1	0.999	4	2
P50552	P50552 VASP_HUMAN Vasodilator-stimulated phosphoprotein OS=Homo sapiens OX=9606 GN=VASP PE=1 SV=3	VASP	380	VASP_HUMAN		1	0.999	4	2
P51688	P51688 SPHM_HUMAN N-sulphoglucosamine sulphohydrolase OS=Homo sapiens OX=9606 GN=SGSH PE=1 SV=1	SGSH	502	SPHM_HUMAN		1	0.999	3	2
P56589	P56589 PEX3_HUMAN Peroxisomal biogenesis factor 3 OS=Homo sapiens OX=9606 GN=PEX3 PE=1 SV=1	PEX3	373	PEX3_HUMAN		1	0.999	4	2
P61020	P61020 RAB5B_HUMAN Ras-related protein Rab-5B OS=Homo sapiens OX=9606 GN=RAB5B PE=1 SV=1	RAB5B	215	RAB5B_HUMAN		1	0.999	6	2
Q16401	Q16401 PSMD5_HUMAN 26S proteasome non-ATPase regulatory subunit 5 OS=Homo sapiens OX=9606 GN=PSMD5 PE=1 SV=3	PSMD5	504	PSMD5_HUMAN		1	0.999	4	2
Q6L8Q7	Q6L8Q7 PDE12_HUMAN 2',5'-phosphodiesterase 12 OS=Homo sapiens OX=9606 GN=PDE12 PE=1 SV=2	PDE12	609	PDE12_HUMAN	Q6L8Q7-2	1	0.999	5	2
Q86YM7	Q86YM7 HOME1_HUMAN Homer protein homolog 1 OS=Homo sapiens OX=9606 GN=HOMER1 PE=1 SV=2	HOMER1	354	HOME1_HUMAN		1	0.999	4	2
Q8NFW8	Q8NFW8 NEUA_HUMAN N-acylneuraminate cytidylyltransferase OS=Homo sapiens OX=9606 GN=CMAS PE=1 SV=2	CMAS	434	NEUA_HUMAN		1	0.999	3	2
Q92604	Q92604 LGAT1_HUMAN Acyl-CoA:lysophosphatidylglycerol acyltransferase 1 OS=Homo sapiens OX=9606 GN=LPGAT1 PE=1 SV=1	LPGAT1	370	LGAT1_HUMAN		1	0.999	3	2
Q96GA3	Q96GA3 LTV1_HUMAN Protein LTV1 homolog OS=Homo sapiens OX=9606 GN=LTV1 PE=1 SV=1	LTV1	475	LTV1_HUMAN		1	0.999	4	2
Q9BRS2	Q9BRS2 RIOK1_HUMAN Serine/threonine-protein kinase RIO1 OS=Homo sapiens OX=9606 GN=RIOK1 PE=1 SV=2	RIOK1	568	RIOK1_HUMAN		1	0.999	5	2
Q9BXP5	Q9BXP5 SRRT_HUMAN Serrate RNA effector molecule homolog OS=Homo sapiens OX=9606 GN=SRRT PE=1 SV=1	SRRT	876	SRRT_HUMAN	Q9BXP5-2, Q9BXP5-3, Q9BXP5-4	1	0.999	6	2
P29084	P29084 T2EB_HUMAN Transcription initiation factor IIE subunit beta OS=Homo sapiens OX=9606 GN=GTF2E2 PE=1 SV=1	GTF2E2	291	T2EB_HUMAN		0.9972	0.999	2	2
P55957	P55957 BID_HUMAN BH3-interacting domain death agonist OS=Homo sapiens OX=9606 GN=BID PE=1 SV=1	BID	195	BID_HUMAN	P55957-2	1	0.999	3	2
Q7L5D6	Q7L5D6 GET4_HUMAN Golgi to ER traffic protein 4 homolog OS=Homo sapiens OX=9606 GN=GET4 PE=1 SV=1	GET4	327	GET4_HUMAN		1	0.999	3	2
Q7Z739	Q7Z739 YTHD3_HUMAN YTH domain-containing family protein 3 OS=Homo sapiens OX=9606 GN=YTHDF3 PE=1 SV=1	YTHDF3	585	YTHD3_HUMAN		1	0.999	6	2
Q8IYK4	Q8IYK4 GT252_HUMAN Procollagen galactosyltransferase 2 OS=Homo sapiens OX=9606 GN=COLGALT2 PE=1 SV=1	COLGALT2	626	GT252_HUMAN		1	0.999	4	2
Q8WUA2	Q8WUA2 PPIL4_HUMAN Peptidyl-prolyl cis-trans isomerase-like 4 OS=Homo sapiens OX=9606 GN=PPIL4 PE=1 SV=1	PPIL4	492	PPIL4_HUMAN		1	0.999	3	2
Q9HA64	Q9HA64 KT3K_HUMAN Ketosamine-3-kinase OS=Homo sapiens OX=9606 GN=FN3KRP PE=1 SV=2	FN3KRP	309	KT3K_HUMAN		1	0.999	2	2
Q9NQ50	Q9NQ50 RM40_HUMAN 39S ribosomal protein L40, mitochondrial OS=Homo sapiens OX=9606 GN=MRPL40 PE=1 SV=1	MRPL40	206	RM40_HUMAN		0.9308	0.999	1	2
Q9NVJ2	Q9NVJ2 ARL8B_HUMAN ADP-ribosylation factor-like protein 8B OS=Homo sapiens OX=9606 GN=ARL8B PE=1 SV=1	ARL8B	186	ARL8B_HUMAN		1	0.999	9	2
Q9P0U1	Q9P0U1 TOM7_HUMAN Mitochondrial import receptor subunit TOM7 homolog OS=Homo sapiens OX=9606 GN=TOMM7 PE=1 SV=1	TOMM7	55	TOM7_HUMAN		0.9994	0.999	2	2
Q9P0Z9	Q9P0Z9 SOX_HUMAN Peroxisomal sarcosine oxidase OS=Homo sapiens OX=9606 GN=PIPOX PE=1 SV=2	PIPOX	390	SOX_HUMAN		1	0.999	3	2
A9QM74	A9QM74 IMA8_HUMAN Importin subunit alpha-8 OS=Homo sapiens OX=9606 GN=KPNA7 PE=1 SV=1	KPNA7	516	IMA8_HUMAN		0.9968	0.999	2	2
O15116	O15116 LSM1_HUMAN U6 snRNA-associated Sm-like protein LSm1 OS=Homo sapiens OX=9606 GN=LSM1 PE=1 SV=1	LSM1	133	LSM1_HUMAN		0.9308	0.999	1	2
O43447	O43447 PPIH_HUMAN Peptidyl-prolyl cis-trans isomerase H OS=Homo sapiens OX=9606 GN=PPIH PE=1 SV=1	PPIH	177	PPIH_HUMAN		1	0.999	3	2
O75122-3	O75122-3 CLAP2_HUMAN Isoform 3 of CLIP-associating protein 2 OS=Homo sapiens OX=9606 GN=CLASP2	CLASP2	1515	CLAP2_HUMAN		1	0.999	3	2
O96007	O96007 MOC2B_HUMAN Molybdopterin synthase catalytic subunit OS=Homo sapiens OX=9606 GN=MOCS2 PE=1 SV=1	MOCS2	188	MOC2B_HUMAN		0.9308	0.999	1	2
P09488	P09488 GSTM1_HUMAN Glutathione S-transferase Mu 1 OS=Homo sapiens OX=9606 GN=GSTM1 PE=1 SV=3	GSTM1	218	GSTM1_HUMAN	P09488-2, Q03013, Q03013-2	0.9998	0.999	3	2
P15529-2	P15529-2 MCP_HUMAN Isoform B of Membrane cofactor protein OS=Homo sapiens OX=9606 GN=CD46	CD46	399	MCP_HUMAN	P15529-3, P15529-4, P15529-5, P15529-6, P15529-7	0.9945	0.999	3	2
P20338	P20338 RAB4A_HUMAN Ras-related protein Rab-4A OS=Homo sapiens OX=9606 GN=RAB4A PE=1 SV=3	RAB4A	218	RAB4A_HUMAN		1	0.999	4	2
P62166	P62166 NCS1_HUMAN Neuronal calcium sensor 1 OS=Homo sapiens OX=9606 GN=NCS1 PE=1 SV=2	NCS1	190	NCS1_HUMAN	P62166-2	1	0.999	2	2
Q13636	Q13636 RAB31_HUMAN Ras-related protein Rab-31 OS=Homo sapiens OX=9606 GN=RAB31 PE=1 SV=1	RAB31	194	RAB31_HUMAN		1	0.999	2	2
Q15014	Q15014 MO4L2_HUMAN Mortality factor 4-like protein 2 OS=Homo sapiens OX=9606 GN=MORF4L2 PE=1 SV=1	MORF4L2	288	MO4L2_HUMAN		1	0.999	4	2
Q17RC7	Q17RC7 EX3L4_HUMAN Exocyst complex component 3-like protein 4 OS=Homo sapiens OX=9606 GN=EXOC3L4 PE=1 SV=2	EXOC3L4	722	EX3L4_HUMAN		0.9817	0.9952	2	2
Q6DD87	Q6DD87 ZN787_HUMAN Zinc finger protein 787 OS=Homo sapiens OX=9606 GN=ZNF787 PE=1 SV=4	ZNF787	382	ZN787_HUMAN		1	0.999	3	2
Q8N8L6	Q8N8L6 ARL10_HUMAN ADP-ribosylation factor-like protein 10 OS=Homo sapiens OX=9606 GN=ARL10 PE=2 SV=1	ARL10	244	ARL10_HUMAN		0.9999	0.999	2	2
Q8WU90	Q8WU90 ZC3HF_HUMAN Zinc finger CCCH domain-containing protein 15 OS=Homo sapiens OX=9606 GN=ZC3H15 PE=1 SV=1	ZC3H15	426	ZC3HF_HUMAN		1	0.999	3	2
Q96KB5	Q96KB5 TOPK_HUMAN Lymphokine-activated killer T-cell-originated protein kinase OS=Homo sapiens OX=9606 GN=PBK PE=1 SV=3	PBK	322	TOPK_HUMAN	Q96KB5-2	1	0.999	4	2
Q9BXK5	Q9BXK5 B2L13_HUMAN Bcl-2-like protein 13 OS=Homo sapiens OX=9606 GN=BCL2L13 PE=1 SV=1	BCL2L13	485	B2L13_HUMAN		1	0.999	3	2
Q9H4A6	Q9H4A6 GOLP3_HUMAN Golgi phosphoprotein 3 OS=Homo sapiens OX=9606 GN=GOLPH3 PE=1 SV=1	GOLPH3	298	GOLP3_HUMAN		1	0.999	2	2
Q9H7E9	Q9H7E9 CH033_HUMAN UPF0488 protein C8orf33 OS=Homo sapiens OX=9606 GN=C8orf33 PE=1 SV=1	C8orf33	229	CH033_HUMAN	Q9H7E9-2	0.9978	0.999	2	2
Q9NV56	Q9NV56 MRGBP_HUMAN MRG/MORF4L-binding protein OS=Homo sapiens OX=9606 GN=MRGBP PE=1 SV=1	MRGBP	204	MRGBP_HUMAN		0.9308	0.999	1	2
Q9NW64	Q9NW64 RBM22_HUMAN Pre-mRNA-splicing factor RBM22 OS=Homo sapiens OX=9606 GN=RBM22 PE=1 SV=1	RBM22	420	RBM22_HUMAN	Q9NW64-2	1	0.999	2	2
Q9NZD2	Q9NZD2 GLTP_HUMAN Glycolipid transfer protein OS=Homo sapiens OX=9606 GN=GLTP PE=1 SV=3	GLTP	209	GLTP_HUMAN		1	0.999	2	2
O75530	O75530 EED_HUMAN Polycomb protein EED OS=Homo sapiens OX=9606 GN=EED PE=1 SV=2	EED	441	EED_HUMAN	O75530-2, O75530-3	1	0.999	2	2
O75907	O75907 DGAT1_HUMAN Diacylglycerol O-acyltransferase 1 OS=Homo sapiens OX=9606 GN=DGAT1 PE=1 SV=2	DGAT1	488	DGAT1_HUMAN		0.9957	0.999	1	2
P00709	P00709 LALBA_HUMAN Alpha-lactalbumin OS=Homo sapiens OX=9606 GN=LALBA PE=1 SV=1	LALBA	142	LALBA_HUMAN		0.9163	0.9988	1	2
P09234	P09234 RU1C_HUMAN U1 small nuclear ribonucleoprotein C OS=Homo sapiens OX=9606 GN=SNRPC PE=1 SV=1	SNRPC	159	RU1C_HUMAN		1	0.999	2	2
P09601	P09601 HMOX1_HUMAN Heme oxygenase 1 OS=Homo sapiens OX=9606 GN=HMOX1 PE=1 SV=1	HMOX1	288	HMOX1_HUMAN		0.9971	0.999	2	2
P11137-4	P11137-4 MTAP2_HUMAN Isoform 4 of Microtubule-associated protein 2 OS=Homo sapiens OX=9606 GN=MAP2	MAP2	559	MTAP2_HUMAN		0.9997	0.999	6	2
P13984	P13984 T2FB_HUMAN General transcription factor IIF subunit 2 OS=Homo sapiens OX=9606 GN=GTF2F2 PE=1 SV=2	GTF2F2	249	T2FB_HUMAN		1	0.999	2	2
P30491	P30491 1B53_HUMAN HLA class I histocompatibility antigen, B-53 alpha chain OS=Homo sapiens OX=9606 GN=HLA-B PE=1 SV=1	HLA-B	362	1B53_HUMAN	P30685	0.9979	0.999	14	2
Q13425	Q13425 SNTB2_HUMAN Beta-2-syntrophin OS=Homo sapiens OX=9606 GN=SNTB2 PE=1 SV=1	SNTB2	540	SNTB2_HUMAN		1	0.999	4	2
Q5T0D9	Q5T0D9 TPRGL_HUMAN Tumor protein p63-regulated gene 1-like protein OS=Homo sapiens OX=9606 GN=TPRG1L PE=1 SV=1	TPRG1L	272	TPRGL_HUMAN		1	0.999	3	2
Q6SPF0	Q6SPF0 SAMD1_HUMAN Atherin OS=Homo sapiens OX=9606 GN=SAMD1 PE=1 SV=1	SAMD1	538	SAMD1_HUMAN		0.9308	0.999	1	2
Q7Z3E5	Q7Z3E5 ARMC9_HUMAN LisH domain-containing protein ARMC9 OS=Homo sapiens OX=9606 GN=ARMC9 PE=1 SV=3	ARMC9	818	ARMC9_HUMAN	Q7Z3E5-2	1	0.999	2	2
Q8N0X7	Q8N0X7 SPART_HUMAN Spartin OS=Homo sapiens OX=9606 GN=SPART PE=1 SV=1	SPART	666	SPART_HUMAN		1	0.999	3	2
Q8NHQ9	Q8NHQ9 DDX55_HUMAN ATP-dependent RNA helicase DDX55 OS=Homo sapiens OX=9606 GN=DDX55 PE=1 SV=3	DDX55	600	DDX55_HUMAN		1	0.999	3	2
Q96EL3	Q96EL3 RM53_HUMAN 39S ribosomal protein L53, mitochondrial OS=Homo sapiens OX=9606 GN=MRPL53 PE=1 SV=1	MRPL53	112	RM53_HUMAN		1	0.999	3	2
Q9GZT4	Q9GZT4 SRR_HUMAN Serine racemase OS=Homo sapiens OX=9606 GN=SRR PE=1 SV=1	SRR	340	SRR_HUMAN		1	0.999	2	2
Q9H9S4	Q9H9S4 CB39L_HUMAN Calcium-binding protein 39-like OS=Homo sapiens OX=9606 GN=CAB39L PE=1 SV=3	CAB39L	337	CB39L_HUMAN		0.9994	0.9989	3	2
Q9HC35	Q9HC35 EMAL4_HUMAN Echinoderm microtubule-associated protein-like 4 OS=Homo sapiens OX=9606 GN=EML4 PE=1 SV=3	EML4	981	EMAL4_HUMAN	Q9HC35-2	1	0.999	3	2
Q9NPD8	Q9NPD8 UBE2T_HUMAN Ubiquitin-conjugating enzyme E2 T OS=Homo sapiens OX=9606 GN=UBE2T PE=1 SV=1	UBE2T	197	UBE2T_HUMAN		1	0.999	3	2
Q9NYB0	Q9NYB0 TE2IP_HUMAN Telomeric repeat-binding factor 2-interacting protein 1 OS=Homo sapiens OX=9606 GN=TERF2IP PE=1 SV=1	TERF2IP	399	TE2IP_HUMAN		1	0.999	4	2
Q9UFW8	Q9UFW8 CGBP1_HUMAN CGG triplet repeat-binding protein 1 OS=Homo sapiens OX=9606 GN=CGGBP1 PE=1 SV=2	CGGBP1	167	CGBP1_HUMAN		1	0.999	4	2
Q9ULC3	Q9ULC3 RAB23_HUMAN Ras-related protein Rab-23 OS=Homo sapiens OX=9606 GN=RAB23 PE=1 SV=1	RAB23	237	RAB23_HUMAN		1	0.999	2	2
Q9UNK0	Q9UNK0 STX8_HUMAN Syntaxin-8 OS=Homo sapiens OX=9606 GN=STX8 PE=1 SV=2	STX8	236	STX8_HUMAN		0.9995	0.999	2	2
Q9Y5Y5	Q9Y5Y5 PEX16_HUMAN Peroxisomal membrane protein PEX16 OS=Homo sapiens OX=9606 GN=PEX16 PE=1 SV=2	PEX16	336	PEX16_HUMAN		0.9999	0.999	2	2
O43929	O43929 ORC4_HUMAN Origin recognition complex subunit 4 OS=Homo sapiens OX=9606 GN=ORC4 PE=1 SV=2	ORC4	436	ORC4_HUMAN	O43929-2, O43929-3	1	0.999	2	2
O60476	O60476 MA1A2_HUMAN Mannosyl-oligosaccharide 1,2-alpha-mannosidase IB OS=Homo sapiens OX=9606 GN=MAN1A2 PE=1 SV=1	MAN1A2	641	MA1A2_HUMAN		1	0.999	3	2
O75635	O75635 SPB7_HUMAN Serpin B7 OS=Homo sapiens OX=9606 GN=SERPINB7 PE=1 SV=1	SERPINB7	380	SPB7_HUMAN	O75635-2	1	0.999	3	2
O95400	O95400 CD2B2_HUMAN CD2 antigen cytoplasmic tail-binding protein 2 OS=Homo sapiens OX=9606 GN=CD2BP2 PE=1 SV=1	CD2BP2	341	CD2B2_HUMAN		1	0.999	2	2
P02545-2	P02545-2 LMNA_HUMAN Isoform C of Prelamin-A/C OS=Homo sapiens OX=9606 GN=LMNA	LMNA	664	LMNA_HUMAN		1	0.999	20	2
P07947	P07947 YES_HUMAN Tyrosine-protein kinase Yes OS=Homo sapiens OX=9606 GN=YES1 PE=1 SV=3	YES1	543	YES_HUMAN		1	0.999	4	2
P49790	P49790 NU153_HUMAN Nuclear pore complex protein Nup153 OS=Homo sapiens OX=9606 GN=NUP153 PE=1 SV=2	NUP153	1475	NU153_HUMAN	P49790-2, P49790-3	1	0.999	3	2
P51580	P51580 TPMT_HUMAN Thiopurine S-methyltransferase OS=Homo sapiens OX=9606 GN=TPMT PE=1 SV=1	TPMT	245	TPMT_HUMAN		1	0.999	3	2
Q16774	Q16774 KGUA_HUMAN Guanylate kinase OS=Homo sapiens OX=9606 GN=GUK1 PE=1 SV=2	GUK1	197	KGUA_HUMAN	Q16774-2	1	0.999	2	2
Q6P1Q9	Q6P1Q9 MET2B_HUMAN Methyltransferase-like protein 2B OS=Homo sapiens OX=9606 GN=METTL2B PE=1 SV=3	METTL2B	378	MET2B_HUMAN		1	0.999	3	2
Q6PJT7	Q6PJT7 ZC3HE_HUMAN Zinc finger CCCH domain-containing protein 14 OS=Homo sapiens OX=9606 GN=ZC3H14 PE=1 SV=1	ZC3H14	736	ZC3HE_HUMAN	Q6PJT7-10, Q6PJT7-11, Q6PJT7-2, Q6PJT7-3, Q6PJT7-4, Q6PJT7-5, Q6PJT7-9	1	0.999	3	2
Q7Z3F1	Q7Z3F1 GP155_HUMAN Integral membrane protein GPR155 OS=Homo sapiens OX=9606 GN=GPR155 PE=2 SV=2	GPR155	870	GP155_HUMAN		0.9301	0.999	1	2
Q8NG11	Q8NG11 TSN14_HUMAN Tetraspanin-14 OS=Homo sapiens OX=9606 GN=TSPAN14 PE=1 SV=1	TSPAN14	270	TSN14_HUMAN	Q8NG11-2	1	0.999	2	2
Q8NI37	Q8NI37 PPTC7_HUMAN Protein phosphatase PTC7 homolog OS=Homo sapiens OX=9606 GN=PPTC7 PE=2 SV=1	PPTC7	304	PPTC7_HUMAN		0.9998	0.9985	2	2
Q92968	Q92968 PEX13_HUMAN Peroxisomal membrane protein PEX13 OS=Homo sapiens OX=9606 GN=PEX13 PE=1 SV=2	PEX13	403	PEX13_HUMAN		1	0.999	2	2
Q96B54	Q96B54 ZN428_HUMAN Zinc finger protein 428 OS=Homo sapiens OX=9606 GN=ZNF428 PE=1 SV=2	ZNF428	188	ZN428_HUMAN		0.9999	0.999	2	2
Q9BVK2	Q9BVK2 ALG8_HUMAN Probable dolichyl pyrophosphate Glc1Man9GlcNAc2 alpha-1,3-glucosyltransferase OS=Homo sapiens OX=9606 GN=ALG8 PE=1 SV=2	ALG8	526	ALG8_HUMAN	Q9BVK2-2	0.9999	0.999	2	2
Q9BW60	Q9BW60 ELOV1_HUMAN Elongation of very long chain fatty acids protein 1 OS=Homo sapiens OX=9606 GN=ELOVL1 PE=1 SV=1	ELOVL1	279	ELOV1_HUMAN		1	0.999	3	2
Q9NUB1	Q9NUB1 ACS2L_HUMAN Acetyl-coenzyme A synthetase 2-like, mitochondrial OS=Homo sapiens OX=9606 GN=ACSS1 PE=1 SV=2	ACSS1	689	ACS2L_HUMAN	Q9NUB1-2	1	0.999	3	2
Q9NVV0	Q9NVV0 TM38B_HUMAN Trimeric intracellular cation channel type B OS=Homo sapiens OX=9606 GN=TMEM38B PE=1 SV=1	TMEM38B	291	TM38B_HUMAN		0.9968	0.999	2	2
Q9UGP4	Q9UGP4 LIMD1_HUMAN LIM domain-containing protein 1 OS=Homo sapiens OX=9606 GN=LIMD1 PE=1 SV=1	LIMD1	676	LIMD1_HUMAN		0.9992	0.999	2	2
O14602	O14602 IF1AY_HUMAN Eukaryotic translation initiation factor 1A, Y-chromosomal OS=Homo sapiens OX=9606 GN=EIF1AY PE=1 SV=4	EIF1AY	144	IF1AY_HUMAN		0.9985	0.999	4	2
O14653	O14653 GOSR2_HUMAN Golgi SNAP receptor complex member 2 OS=Homo sapiens OX=9606 GN=GOSR2 PE=1 SV=2	GOSR2	212	GOSR2_HUMAN	O14653-2	1	0.999	2	2
O75381	O75381 PEX14_HUMAN Peroxisomal membrane protein PEX14 OS=Homo sapiens OX=9606 GN=PEX14 PE=1 SV=1	PEX14	377	PEX14_HUMAN	O75381-2	1	0.999	2	2
P09038	P09038 FGF2_HUMAN Fibroblast growth factor 2 OS=Homo sapiens OX=9606 GN=FGF2 PE=1 SV=3	FGF2	288	FGF2_HUMAN	P09038-1, P09038-2, P09038-3	1	0.999	2	2
P0DI83	P0DI83 NARR_HUMAN Ras-related protein Rab-34, isoform NARR OS=Homo sapiens OX=9606 GN=RAB34 PE=1 SV=1	RAB34	198	NARR_HUMAN		0.9308	0.999	1	2
P29692-3	P29692-3 EF1D_HUMAN Isoform 3 of Elongation factor 1-delta OS=Homo sapiens OX=9606 GN=EEF1D	EEF1D	257	EF1D_HUMAN		1	0.999	5	2
P52799	P52799 EFNB2_HUMAN Ephrin-B2 OS=Homo sapiens OX=9606 GN=EFNB2 PE=1 SV=1	EFNB2	333	EFNB2_HUMAN		0.9999	0.9989	2	2
P83111	P83111 LACTB_HUMAN Serine beta-lactamase-like protein LACTB, mitochondrial OS=Homo sapiens OX=9606 GN=LACTB PE=1 SV=2	LACTB	547	LACTB_HUMAN		1	0.999	2	2
Q02241	Q02241 KIF23_HUMAN Kinesin-like protein KIF23 OS=Homo sapiens OX=9606 GN=KIF23 PE=1 SV=3	KIF23	960	KIF23_HUMAN		0.9995	0.9984	2	2
Q14141	Q14141 SEPT6_HUMAN Septin-6 OS=Homo sapiens OX=9606 GN=SEPT6 PE=1 SV=4	44810	434	SEPT6_HUMAN	Q14141-2, Q14141-4	1	0.999	7	2
Q15052	Q15052 ARHG6_HUMAN Rho guanine nucleotide exchange factor 6 OS=Homo sapiens OX=9606 GN=ARHGEF6 PE=1 SV=2	ARHGEF6	776	ARHG6_HUMAN	Q15052-2	1	0.999	3	2
Q16270	Q16270 IBP7_HUMAN Insulin-like growth factor-binding protein 7 OS=Homo sapiens OX=9606 GN=IGFBP7 PE=1 SV=1	IGFBP7	282	IBP7_HUMAN	Q16270-2	1	0.999	2	2
Q5VT66	Q5VT66 MARC1_HUMAN Mitochondrial amidoxime-reducing component 1 OS=Homo sapiens OX=9606 GN=MARC1 PE=1 SV=1	44621	337	MARC1_HUMAN	Q5VT66-2	0.9999	0.999	2	2
Q6ZWT7	Q6ZWT7 MBOA2_HUMAN Lysophospholipid acyltransferase 2 OS=Homo sapiens OX=9606 GN=MBOAT2 PE=2 SV=2	MBOAT2	520	MBOA2_HUMAN		0.9306	0.999	1	2
Q86YP4	Q86YP4 P66A_HUMAN Transcriptional repressor p66-alpha OS=Homo sapiens OX=9606 GN=GATAD2A PE=1 SV=1	GATAD2A	633	P66A_HUMAN	Q86YP4-2, Q86YP4-3	1	0.999	3	2
Q8N357	Q8N357 S35F6_HUMAN Solute carrier family 35 member F6 OS=Homo sapiens OX=9606 GN=SLC35F6 PE=1 SV=1	SLC35F6	371	S35F6_HUMAN		0.9308	0.999	1	2
Q8NEU8	Q8NEU8 DP13B_HUMAN DCC-interacting protein 13-beta OS=Homo sapiens OX=9606 GN=APPL2 PE=1 SV=3	APPL2	664	DP13B_HUMAN	Q8NEU8-2	1	0.999	2	2
Q8TB61	Q8TB61 S35B2_HUMAN Adenosine 3'-phospho 5'-phosphosulfate transporter 1 OS=Homo sapiens OX=9606 GN=SLC35B2 PE=1 SV=1	SLC35B2	432	S35B2_HUMAN	Q8TB61-2, Q8TB61-3	1	0.999	2	2
Q8TCG1	Q8TCG1 CIP2A_HUMAN Protein CIP2A OS=Homo sapiens OX=9606 GN=CIP2A PE=1 SV=2	CIP2A	905	CIP2A_HUMAN		1	0.999	2	2
Q8TDW0	Q8TDW0 LRC8C_HUMAN Volume-regulated anion channel subunit LRRC8C OS=Homo sapiens OX=9606 GN=LRRC8C PE=1 SV=2	LRRC8C	803	LRC8C_HUMAN		0.9308	0.999	1	2
Q8TED1	Q8TED1 GPX8_HUMAN Probable glutathione peroxidase 8 OS=Homo sapiens OX=9606 GN=GPX8 PE=1 SV=2	GPX8	209	GPX8_HUMAN		1	0.999	2	2
Q96DX4	Q96DX4 RSPRY_HUMAN RING finger and SPRY domain-containing protein 1 OS=Homo sapiens OX=9606 GN=RSPRY1 PE=1 SV=1	RSPRY1	576	RSPRY_HUMAN		0.9985	0.999	2	2
Q96EL2	Q96EL2 RT24_HUMAN 28S ribosomal protein S24, mitochondrial OS=Homo sapiens OX=9606 GN=MRPS24 PE=1 SV=1	MRPS24	167	RT24_HUMAN		0.9945	0.999	1	2
Q96ES7	Q96ES7 SGF29_HUMAN SAGA-associated factor 29 OS=Homo sapiens OX=9606 GN=SGF29 PE=1 SV=1	SGF29	293	SGF29_HUMAN		0.9993	0.9989	2	2
Q9BQE4	Q9BQE4 SELS_HUMAN Selenoprotein S OS=Homo sapiens OX=9606 GN=SELENOS PE=1 SV=3	SELENOS	189	SELS_HUMAN		0.9998	0.9979	2	2
Q9BRP1	Q9BRP1 PDD2L_HUMAN Programmed cell death protein 2-like OS=Homo sapiens OX=9606 GN=PDCD2L PE=1 SV=1	PDCD2L	358	PDD2L_HUMAN		0.9308	0.999	1	2
Q9BV10	Q9BV10 ALG12_HUMAN Dol-P-Man:Man(7)GlcNAc(2)-PP-Dol alpha-1,6-mannosyltransferase OS=Homo sapiens OX=9606 GN=ALG12 PE=1 SV=1	ALG12	488	ALG12_HUMAN		0.9308	0.999	1	2
Q9H0H5	Q9H0H5 RGAP1_HUMAN Rac GTPase-activating protein 1 OS=Homo sapiens OX=9606 GN=RACGAP1 PE=1 SV=1	RACGAP1	632	RGAP1_HUMAN		0.9965	0.999	2	2
Q9H3H3	Q9H3H3 CK068_HUMAN UPF0696 protein C11orf68 OS=Homo sapiens OX=9606 GN=C11orf68 PE=1 SV=3	C11orf68	292	CK068_HUMAN	Q9H3H3-3	0.9999	0.9989	2	2
Q9H3K2	Q9H3K2 GHITM_HUMAN Growth hormone-inducible transmembrane protein OS=Homo sapiens OX=9606 GN=GHITM PE=1 SV=2	GHITM	345	GHITM_HUMAN		0.9999	0.9989	2	2
Q9H4E5	Q9H4E5 RHOJ_HUMAN Rho-related GTP-binding protein RhoJ OS=Homo sapiens OX=9606 GN=RHOJ PE=1 SV=1	RHOJ	214	RHOJ_HUMAN	Q9H4E5-2	0.98	0.999	2	2
Q9NR56-2	Q9NR56-2 MBNL1_HUMAN Isoform 2 of Muscleblind-like protein 1 OS=Homo sapiens OX=9606 GN=MBNL1	MBNL1	370	MBNL1_HUMAN	Q9NR56-3, Q9NR56-4, Q9NR56-5, Q9NR56-6	0.9986	0.999	3	2
Q9NVM6	Q9NVM6 DJC17_HUMAN DnaJ homolog subfamily C member 17 OS=Homo sapiens OX=9606 GN=DNAJC17 PE=1 SV=1	DNAJC17	304	DJC17_HUMAN		0.9961	0.999	1	2
Q9NXH9	Q9NXH9 TRM1_HUMAN tRNA (guanine(26)-N(2))-dimethyltransferase OS=Homo sapiens OX=9606 GN=TRMT1 PE=1 SV=1	TRMT1	659	TRM1_HUMAN	Q9NXH9-2	1	0.999	2	2
Q9UJX4	Q9UJX4 APC5_HUMAN Anaphase-promoting complex subunit 5 OS=Homo sapiens OX=9606 GN=ANAPC5 PE=1 SV=2	ANAPC5	755	APC5_HUMAN		1	0.999	1	2
Q9Y2G5	Q9Y2G5 OFUT2_HUMAN GDP-fucose protein O-fucosyltransferase 2 OS=Homo sapiens OX=9606 GN=POFUT2 PE=1 SV=3	POFUT2	429	OFUT2_HUMAN	Q9Y2G5-1	1	0.999	2	2
Q96SB8	Q96SB8 SMC6_HUMAN Structural maintenance of chromosomes protein 6 OS=Homo sapiens OX=9606 GN=SMC6 PE=1 SV=2	SMC6	1091	SMC6_HUMAN		1	0.999	1	1
P15559	P15559 NQO1_HUMAN NAD(P)H dehydrogenase [quinone] 1 OS=Homo sapiens OX=9606 GN=NQO1 PE=1 SV=1	NQO1	274	NQO1_HUMAN	P15559-2	1	0.999	10	1
Q6ZVX7	Q6ZVX7 FBX50_HUMAN F-box only protein 50 OS=Homo sapiens OX=9606 GN=NCCRP1 PE=1 SV=1	NCCRP1	275	FBX50_HUMAN		1	0.999	6	1
O00541	O00541 PESC_HUMAN Pescadillo homolog OS=Homo sapiens OX=9606 GN=PES1 PE=1 SV=1	PES1	588	PESC_HUMAN	O00541-2	1	0.999	12	1
Q6PKG0	Q6PKG0 LARP1_HUMAN La-related protein 1 OS=Homo sapiens OX=9606 GN=LARP1 PE=1 SV=2	LARP1	1096	LARP1_HUMAN		1	0.999	11	1
Q92597	Q92597 NDRG1_HUMAN Protein NDRG1 OS=Homo sapiens OX=9606 GN=NDRG1 PE=1 SV=1	NDRG1	394	NDRG1_HUMAN		1	0.999	7	1
A6ZKI3	A6ZKI3 RTL8C_HUMAN Retrotransposon Gag-like protein 8B OS=Homo sapiens OX=9606 GN=RTL8C PE=1 SV=1	RTL8C	113	RTL8C_HUMAN		1	0.999	4	1
Q8NAV1	Q8NAV1 PR38A_HUMAN Pre-mRNA-splicing factor 38A OS=Homo sapiens OX=9606 GN=PRPF38A PE=1 SV=1	PRPF38A	312	PR38A_HUMAN		1	0.999	7	1
Q9BW92	Q9BW92 SYTM_HUMAN Threonine--tRNA ligase, mitochondrial OS=Homo sapiens OX=9606 GN=TARS2 PE=1 SV=1	TARS2	718	SYTM_HUMAN		1	0.999	7	1
O75044	O75044 SRGP2_HUMAN SLIT-ROBO Rho GTPase-activating protein 2 OS=Homo sapiens OX=9606 GN=SRGAP2 PE=1 SV=3	SRGAP2	1071	SRGP2_HUMAN		1	0.999	6	1
O75368	O75368 SH3L1_HUMAN SH3 domain-binding glutamic acid-rich-like protein OS=Homo sapiens OX=9606 GN=SH3BGRL PE=1 SV=1	SH3BGRL	114	SH3L1_HUMAN		1	0.999	6	1
Q93050	Q93050 VPP1_HUMAN V-type proton ATPase 116 kDa subunit a isoform 1 OS=Homo sapiens OX=9606 GN=ATP6V0A1 PE=1 SV=3	ATP6V0A1	837	VPP1_HUMAN	Q93050-1, Q93050-3	1	0.999	6	1
P21283	P21283 VATC1_HUMAN V-type proton ATPase subunit C 1 OS=Homo sapiens OX=9606 GN=ATP6V1C1 PE=1 SV=4	ATP6V1C1	382	VATC1_HUMAN		1	0.999	6	1
P22681	P22681 CBL_HUMAN E3 ubiquitin-protein ligase CBL OS=Homo sapiens OX=9606 GN=CBL PE=1 SV=2	CBL	906	CBL_HUMAN		1	0.999	6	1
P35611	P35611 ADDA_HUMAN Alpha-adducin OS=Homo sapiens OX=9606 GN=ADD1 PE=1 SV=2	ADD1	737	ADDA_HUMAN	P35611-2, P35611-3, P35611-4, P35611-6	1	0.999	4	1
Q96CW5	Q96CW5 GCP3_HUMAN Gamma-tubulin complex component 3 OS=Homo sapiens OX=9606 GN=TUBGCP3 PE=1 SV=2	TUBGCP3	907	GCP3_HUMAN	Q96CW5-2	1	0.999	7	1
Q99720	Q99720 SGMR1_HUMAN Sigma non-opioid intracellular receptor 1 OS=Homo sapiens OX=9606 GN=SIGMAR1 PE=1 SV=1	SIGMAR1	223	SGMR1_HUMAN		1	0.999	2	1
Q9UBU9	Q9UBU9 NXF1_HUMAN Nuclear RNA export factor 1 OS=Homo sapiens OX=9606 GN=NXF1 PE=1 SV=1	NXF1	619	NXF1_HUMAN		1	0.999	5	1
O75312	O75312 ZPR1_HUMAN Zinc finger protein ZPR1 OS=Homo sapiens OX=9606 GN=ZPR1 PE=1 SV=1	ZPR1	459	ZPR1_HUMAN		1	0.999	6	1
O76015	O76015 KRT38_HUMAN Keratin, type I cuticular Ha8 OS=Homo sapiens OX=9606 GN=KRT38 PE=1 SV=3	KRT38	456	KRT38_HUMAN		1	0.999	4	1
P04424	P04424 ARLY_HUMAN Argininosuccinate lyase OS=Homo sapiens OX=9606 GN=ASL PE=1 SV=4	ASL	464	ARLY_HUMAN	P04424-2	1	0.999	4	1
Q14525	Q14525 KT33B_HUMAN Keratin, type I cuticular Ha3-II OS=Homo sapiens OX=9606 GN=KRT33B PE=1 SV=3	KRT33B	404	KT33B_HUMAN		1	0.999	14	1
Q4V339	Q4V339 CBWD6_HUMAN COBW domain-containing protein 6 OS=Homo sapiens OX=9606 GN=CBWD6 PE=3 SV=1	CBWD6	395	CBWD6_HUMAN	Q5JTY5, Q5JTY5-2, Q5RIA9, Q8IUF1, Q9BRT8	1	0.999	6	1
Q8N335	Q8N335 GPD1L_HUMAN Glycerol-3-phosphate dehydrogenase 1-like protein OS=Homo sapiens OX=9606 GN=GPD1L PE=1 SV=1	GPD1L	351	GPD1L_HUMAN		1	0.999	6	1
Q9P2X0	Q9P2X0 DPM3_HUMAN Dolichol-phosphate mannosyltransferase subunit 3 OS=Homo sapiens OX=9606 GN=DPM3 PE=1 SV=2	DPM3	92	DPM3_HUMAN	Q9P2X0-2	1	0.999	2	1
Q9Y4K3	Q9Y4K3 TRAF6_HUMAN TNF receptor-associated factor 6 OS=Homo sapiens OX=9606 GN=TRAF6 PE=1 SV=1	TRAF6	522	TRAF6_HUMAN		1	0.999	3	1
O14734	O14734 ACOT8_HUMAN Acyl-coenzyme A thioesterase 8 OS=Homo sapiens OX=9606 GN=ACOT8 PE=1 SV=1	ACOT8	319	ACOT8_HUMAN		1	0.999	3	1
O95989	O95989 NUDT3_HUMAN Diphosphoinositol polyphosphate phosphohydrolase 1 OS=Homo sapiens OX=9606 GN=NUDT3 PE=1 SV=1	NUDT3	172	NUDT3_HUMAN		1	0.999	4	1
P10606	P10606 COX5B_HUMAN Cytochrome c oxidase subunit 5B, mitochondrial OS=Homo sapiens OX=9606 GN=COX5B PE=1 SV=2	COX5B	129	COX5B_HUMAN		1	0.999	3	1
Q86VS8	Q86VS8 HOOK3_HUMAN Protein Hook homolog 3 OS=Homo sapiens OX=9606 GN=HOOK3 PE=1 SV=2	HOOK3	718	HOOK3_HUMAN		1	0.999	5	1
Q8NFZ8	Q8NFZ8 CADM4_HUMAN Cell adhesion molecule 4 OS=Homo sapiens OX=9606 GN=CADM4 PE=1 SV=1	CADM4	388	CADM4_HUMAN		1	0.999	3	1
Q96C23	Q96C23 GALM_HUMAN Aldose 1-epimerase OS=Homo sapiens OX=9606 GN=GALM PE=1 SV=1	GALM	342	GALM_HUMAN		1	0.999	3	1
Q99848	Q99848 EBP2_HUMAN Probable rRNA-processing protein EBP2 OS=Homo sapiens OX=9606 GN=EBNA1BP2 PE=1 SV=2	EBNA1BP2	306	EBP2_HUMAN		1	0.999	5	1
Q9NX58	Q9NX58 LYAR_HUMAN Cell growth-regulating nucleolar protein OS=Homo sapiens OX=9606 GN=LYAR PE=1 SV=2	LYAR	379	LYAR_HUMAN		1	0.999	7	1
Q9P1F3	Q9P1F3 ABRAL_HUMAN Costars family protein ABRACL OS=Homo sapiens OX=9606 GN=ABRACL PE=1 SV=1	ABRACL	81	ABRAL_HUMAN		1	0.999	2	1
P15882	P15882 CHIN_HUMAN N-chimaerin OS=Homo sapiens OX=9606 GN=CHN1 PE=1 SV=3	CHN1	459	CHIN_HUMAN	P15882-3	1	0.999	3	1
P31327	P31327 CPSM_HUMAN Carbamoyl-phosphate synthase [ammonia], mitochondrial OS=Homo sapiens OX=9606 GN=CPS1 PE=1 SV=2	CPS1	1500	CPSM_HUMAN	P31327-3	1	0.999	4	1
P36959	P36959 GMPR1_HUMAN GMP reductase 1 OS=Homo sapiens OX=9606 GN=GMPR PE=1 SV=1	GMPR	345	GMPR1_HUMAN		1	0.999	6	1
P48147	P48147 PPCE_HUMAN Prolyl endopeptidase OS=Homo sapiens OX=9606 GN=PREP PE=1 SV=2	PREP	710	PPCE_HUMAN		1	0.999	5	1
Q12857-3	Q12857-3 NFIA_HUMAN Isoform 3 of Nuclear factor 1 A-type OS=Homo sapiens OX=9606 GN=NFIA	NFIA	501	NFIA_HUMAN		1	0.999	8	1
Q15629	Q15629 TRAM1_HUMAN Translocating chain-associated membrane protein 1 OS=Homo sapiens OX=9606 GN=TRAM1 PE=1 SV=3	TRAM1	374	TRAM1_HUMAN	Q15629-2	1	0.999	5	1
Q16204	Q16204 CCDC6_HUMAN Coiled-coil domain-containing protein 6 OS=Homo sapiens OX=9606 GN=CCDC6 PE=1 SV=2	CCDC6	474	CCDC6_HUMAN		1	0.999	3	1
Q8IWB1	Q8IWB1 IPRI_HUMAN Inositol 1,4,5-trisphosphate receptor-interacting protein OS=Homo sapiens OX=9606 GN=ITPRIP PE=1 SV=1	ITPRIP	547	IPRI_HUMAN		1	0.999	3	1
Q8IZ81	Q8IZ81 ELMD2_HUMAN ELMO domain-containing protein 2 OS=Homo sapiens OX=9606 GN=ELMOD2 PE=1 SV=1	ELMOD2	293	ELMD2_HUMAN		1	0.999	4	1
Q9NQE9	Q9NQE9 HINT3_HUMAN Histidine triad nucleotide-binding protein 3 OS=Homo sapiens OX=9606 GN=HINT3 PE=1 SV=1	HINT3	182	HINT3_HUMAN		1	0.999	3	1
Q9Y6M7-13	Q9Y6M7-13 S4A7_HUMAN Isoform 13 of Sodium bicarbonate cotransporter 3 OS=Homo sapiens OX=9606 GN=SLC4A7	SLC4A7	1135	S4A7_HUMAN	Q9Y6M7-6	1	0.999	4	1
O95409	O95409 ZIC2_HUMAN Zinc finger protein ZIC 2 OS=Homo sapiens OX=9606 GN=ZIC2 PE=1 SV=2	ZIC2	532	ZIC2_HUMAN		1	0.999	3	1
P07205	P07205 PGK2_HUMAN Phosphoglycerate kinase 2 OS=Homo sapiens OX=9606 GN=PGK2 PE=1 SV=3	PGK2	417	PGK2_HUMAN		1	0.999	6	1
Q8IZQ5	Q8IZQ5 SELH_HUMAN Selenoprotein H OS=Homo sapiens OX=9606 GN=SELENOH PE=1 SV=2	SELENOH	122	SELH_HUMAN		1	0.999	3	1
Q8TD22	Q8TD22 SFXN5_HUMAN Sideroflexin-5 OS=Homo sapiens OX=9606 GN=SFXN5 PE=1 SV=1	SFXN5	340	SFXN5_HUMAN		1	0.999	4	1
Q8WYA6	Q8WYA6 CTBL1_HUMAN Beta-catenin-like protein 1 OS=Homo sapiens OX=9606 GN=CTNNBL1 PE=1 SV=1	CTNNBL1	563	CTBL1_HUMAN	Q8WYA6-4	1	0.999	4	1
Q96T60	Q96T60 PNKP_HUMAN Bifunctional polynucleotide phosphatase/kinase OS=Homo sapiens OX=9606 GN=PNKP PE=1 SV=1	PNKP	521	PNKP_HUMAN	Q96T60-2	1	0.999	4	1
Q9BTU6	Q9BTU6 P4K2A_HUMAN Phosphatidylinositol 4-kinase type 2-alpha OS=Homo sapiens OX=9606 GN=PI4K2A PE=1 SV=1	PI4K2A	479	P4K2A_HUMAN		1	0.9988	3	1
Q9BZL1	Q9BZL1 UBL5_HUMAN Ubiquitin-like protein 5 OS=Homo sapiens OX=9606 GN=UBL5 PE=1 SV=1	UBL5	73	UBL5_HUMAN		0.9998	0.9988	2	1
Q9H0E2	Q9H0E2 TOLIP_HUMAN Toll-interacting protein OS=Homo sapiens OX=9606 GN=TOLLIP PE=1 SV=1	TOLLIP	274	TOLIP_HUMAN		1	0.999	3	1
Q9NT99	Q9NT99 LRC4B_HUMAN Leucine-rich repeat-containing protein 4B OS=Homo sapiens OX=9606 GN=LRRC4B PE=2 SV=3	LRRC4B	713	LRC4B_HUMAN		1	0.999	5	1
Q9NWY4	Q9NWY4 HPF1_HUMAN Histone PARylation factor 1 OS=Homo sapiens OX=9606 GN=HPF1 PE=1 SV=2	HPF1	346	HPF1_HUMAN		1	0.999	4	1
O00592	O00592 PODXL_HUMAN Podocalyxin OS=Homo sapiens OX=9606 GN=PODXL PE=1 SV=2	PODXL	558	PODXL_HUMAN	O00592-2	1	0.999	3	1
O75348	O75348 VATG1_HUMAN V-type proton ATPase subunit G 1 OS=Homo sapiens OX=9606 GN=ATP6V1G1 PE=1 SV=3	ATP6V1G1	118	VATG1_HUMAN		1	0.999	2	1
O95295	O95295 SNAPN_HUMAN SNARE-associated protein Snapin OS=Homo sapiens OX=9606 GN=SNAPIN PE=1 SV=1	SNAPIN	136	SNAPN_HUMAN		0.9308	0.999	1	1
O95297	O95297 MPZL1_HUMAN Myelin protein zero-like protein 1 OS=Homo sapiens OX=9606 GN=MPZL1 PE=1 SV=1	MPZL1	269	MPZL1_HUMAN	O95297-2, O95297-4	1	0.999	3	1
P11277	P11277 SPTB1_HUMAN Spectrin beta chain, erythrocytic OS=Homo sapiens OX=9606 GN=SPTB PE=1 SV=5	SPTB	2137	SPTB1_HUMAN	P11277-2, P11277-3	1	0.999	4	1
P17600	P17600 SYN1_HUMAN Synapsin-1 OS=Homo sapiens OX=9606 GN=SYN1 PE=1 SV=3	SYN1	705	SYN1_HUMAN	P17600-2	1	0.999	4	1
P31321	P31321 KAP1_HUMAN cAMP-dependent protein kinase type I-beta regulatory subunit OS=Homo sapiens OX=9606 GN=PRKAR1B PE=1 SV=4	PRKAR1B	381	KAP1_HUMAN		1	0.999	4	1
P40306	P40306 PSB10_HUMAN Proteasome subunit beta type-10 OS=Homo sapiens OX=9606 GN=PSMB10 PE=1 SV=1	PSMB10	273	PSB10_HUMAN		0.9967	0.999	2	1
P43378	P43378 PTN9_HUMAN Tyrosine-protein phosphatase non-receptor type 9 OS=Homo sapiens OX=9606 GN=PTPN9 PE=1 SV=1	PTPN9	593	PTN9_HUMAN		1	0.999	3	1
P54652	P54652 HSP72_HUMAN Heat shock-related 70 kDa protein 2 OS=Homo sapiens OX=9606 GN=HSPA2 PE=1 SV=1	HSPA2	639	HSP72_HUMAN		1	0.9989	16	1
P62745	P62745 RHOB_HUMAN Rho-related GTP-binding protein RhoB OS=Homo sapiens OX=9606 GN=RHOB PE=1 SV=1	RHOB	196	RHOB_HUMAN		1	0.9987	5	1
Q7Z7A3	Q7Z7A3 CTU1_HUMAN Cytoplasmic tRNA 2-thiolation protein 1 OS=Homo sapiens OX=9606 GN=CTU1 PE=1 SV=1	CTU1	348	CTU1_HUMAN		1	0.999	3	1
Q96RQ1	Q96RQ1 ERGI2_HUMAN Endoplasmic reticulum-Golgi intermediate compartment protein 2 OS=Homo sapiens OX=9606 GN=ERGIC2 PE=1 SV=2	ERGIC2	377	ERGI2_HUMAN		1	0.999	2	1
Q9Y5K6	Q9Y5K6 CD2AP_HUMAN CD2-associated protein OS=Homo sapiens OX=9606 GN=CD2AP PE=1 SV=1	CD2AP	639	CD2AP_HUMAN		1	0.999	4	1
E9PRG8	E9PRG8 CK098_HUMAN Uncharacterized protein C11orf98 OS=Homo sapiens OX=9606 GN=C11orf98 PE=4 SV=2	C11orf98	123	CK098_HUMAN		1	0.999	3	1
O00399	O00399 DCTN6_HUMAN Dynactin subunit 6 OS=Homo sapiens OX=9606 GN=DCTN6 PE=1 SV=1	DCTN6	190	DCTN6_HUMAN		0.9308	0.999	1	1
O14965	O14965 AURKA_HUMAN Aurora kinase A OS=Homo sapiens OX=9606 GN=AURKA PE=1 SV=2	AURKA	403	AURKA_HUMAN		1	0.999	3	1
O75792	O75792 RNH2A_HUMAN Ribonuclease H2 subunit A OS=Homo sapiens OX=9606 GN=RNASEH2A PE=1 SV=2	RNASEH2A	299	RNH2A_HUMAN		1	0.999	2	1
O95363	O95363 SYFM_HUMAN Phenylalanine--tRNA ligase, mitochondrial OS=Homo sapiens OX=9606 GN=FARS2 PE=1 SV=1	FARS2	451	SYFM_HUMAN		1	0.999	3	1
P05161	P05161 ISG15_HUMAN Ubiquitin-like protein ISG15 OS=Homo sapiens OX=9606 GN=ISG15 PE=1 SV=5	ISG15	165	ISG15_HUMAN		1	0.999	2	1
P05386	P05386 RLA1_HUMAN 60S acidic ribosomal protein P1 OS=Homo sapiens OX=9606 GN=RPLP1 PE=1 SV=1	RPLP1	114	RLA1_HUMAN		1	0.999	2	1
P06276	P06276 CHLE_HUMAN Cholinesterase OS=Homo sapiens OX=9606 GN=BCHE PE=1 SV=1	BCHE	602	CHLE_HUMAN		1	0.999	3	1
P06703	P06703 S10A6_HUMAN Protein S100-A6 OS=Homo sapiens OX=9606 GN=S100A6 PE=1 SV=1	S100A6	90	S10A6_HUMAN		0.9963	0.9951	2	1
P29590-14	P29590-14 PML_HUMAN Isoform PML-14 of Protein PML OS=Homo sapiens OX=9606 GN=PML	PML	423	PML_HUMAN		1	0.9988	4	1
P51003	P51003 PAPOA_HUMAN Poly(A) polymerase alpha OS=Homo sapiens OX=9606 GN=PAPOLA PE=1 SV=4	PAPOLA	745	PAPOA_HUMAN		1	0.999	2	1
P52732	P52732 KIF11_HUMAN Kinesin-like protein KIF11 OS=Homo sapiens OX=9606 GN=KIF11 PE=1 SV=2	KIF11	1056	KIF11_HUMAN		1	0.999	2	1
P62834	P62834 RAP1A_HUMAN Ras-related protein Rap-1A OS=Homo sapiens OX=9606 GN=RAP1A PE=1 SV=1	RAP1A	184	RAP1A_HUMAN		1	0.999	12	1
Q14562	Q14562 DHX8_HUMAN ATP-dependent RNA helicase DHX8 OS=Homo sapiens OX=9606 GN=DHX8 PE=1 SV=1	DHX8	1220	DHX8_HUMAN		1	0.9971	4	1
Q15007	Q15007 FL2D_HUMAN Pre-mRNA-splicing regulator WTAP OS=Homo sapiens OX=9606 GN=WTAP PE=1 SV=2	WTAP	396	FL2D_HUMAN		0.9999	0.9964	2	1
Q6Y7W6	Q6Y7W6 GGYF2_HUMAN GRB10-interacting GYF protein 2 OS=Homo sapiens OX=9606 GN=GIGYF2 PE=1 SV=1	GIGYF2	1299	GGYF2_HUMAN	Q6Y7W6-4, Q6Y7W6-5	1	0.999	2	1
Q6ZRP7	Q6ZRP7 QSOX2_HUMAN Sulfhydryl oxidase 2 OS=Homo sapiens OX=9606 GN=QSOX2 PE=1 SV=3	QSOX2	698	QSOX2_HUMAN		1	0.999	2	1
Q86SF2	Q86SF2 GALT7_HUMAN N-acetylgalactosaminyltransferase 7 OS=Homo sapiens OX=9606 GN=GALNT7 PE=1 SV=1	GALNT7	657	GALT7_HUMAN		0.9999	0.999	2	1
Q8N568	Q8N568 DCLK2_HUMAN Serine/threonine-protein kinase DCLK2 OS=Homo sapiens OX=9606 GN=DCLK2 PE=1 SV=4	DCLK2	766	DCLK2_HUMAN	Q8N568-2, Q8N568-3	1	0.999	3	1
Q8NDC0	Q8NDC0 MISSL_HUMAN MAPK-interacting and spindle-stabilizing protein-like OS=Homo sapiens OX=9606 GN=MAPK1IP1L PE=1 SV=4	MAPK1IP1L	245	MISSL_HUMAN		0.9308	0.999	1	1
Q8TAE8	Q8TAE8 G45IP_HUMAN Growth arrest and DNA damage-inducible proteins-interacting protein 1 OS=Homo sapiens OX=9606 GN=GADD45GIP1 PE=1 SV=1	GADD45GIP1	222	G45IP_HUMAN		0.9991	0.999	2	1
Q8WTW3	Q8WTW3 COG1_HUMAN Conserved oligomeric Golgi complex subunit 1 OS=Homo sapiens OX=9606 GN=COG1 PE=1 SV=1	COG1	980	COG1_HUMAN		1	0.999	4	1
Q8WWH5	Q8WWH5 TRUB1_HUMAN Probable tRNA pseudouridine synthase 1 OS=Homo sapiens OX=9606 GN=TRUB1 PE=1 SV=1	TRUB1	349	TRUB1_HUMAN		1	0.9989	2	1
Q92575	Q92575 UBXN4_HUMAN UBX domain-containing protein 4 OS=Homo sapiens OX=9606 GN=UBXN4 PE=1 SV=2	UBXN4	508	UBXN4_HUMAN		1	0.999	2	1
Q96FZ7	Q96FZ7 CHMP6_HUMAN Charged multivesicular body protein 6 OS=Homo sapiens OX=9606 GN=CHMP6 PE=1 SV=3	CHMP6	201	CHMP6_HUMAN		0.9985	0.999	2	1
Q9BVM2	Q9BVM2 DPCD_HUMAN Protein DPCD OS=Homo sapiens OX=9606 GN=DPCD PE=1 SV=2	DPCD	203	DPCD_HUMAN		0.9294	0.999	1	1
Q9H5Q4	Q9H5Q4 TFB2M_HUMAN Dimethyladenosine transferase 2, mitochondrial OS=Homo sapiens OX=9606 GN=TFB2M PE=1 SV=1	TFB2M	396	TFB2M_HUMAN		1	0.999	3	1
Q9HBL8	Q9HBL8 NMRL1_HUMAN NmrA-like family domain-containing protein 1 OS=Homo sapiens OX=9606 GN=NMRAL1 PE=1 SV=1	NMRAL1	299	NMRL1_HUMAN		1	0.9988	4	1
Q9HC36	Q9HC36 MRM3_HUMAN rRNA methyltransferase 3, mitochondrial OS=Homo sapiens OX=9606 GN=MRM3 PE=1 SV=2	MRM3	420	MRM3_HUMAN		1	0.999	2	1
Q9NPL8	Q9NPL8 TIDC1_HUMAN Complex I assembly factor TIMMDC1, mitochondrial OS=Homo sapiens OX=9606 GN=TIMMDC1 PE=1 SV=2	TIMMDC1	285	TIDC1_HUMAN		0.9959	0.999	1	1
Q9ULF5	Q9ULF5 S39AA_HUMAN Zinc transporter ZIP10 OS=Homo sapiens OX=9606 GN=SLC39A10 PE=1 SV=2	SLC39A10	831	S39AA_HUMAN		0.9998	0.999	2	1
Q9UN66	Q9UN66 PCDB8_HUMAN Protocadherin beta-8 OS=Homo sapiens OX=9606 GN=PCDHB8 PE=2 SV=3	PCDHB8	801	PCDB8_HUMAN		0.9972	0.999	3	1
Q9Y625	Q9Y625 GPC6_HUMAN Glypican-6 OS=Homo sapiens OX=9606 GN=GPC6 PE=1 SV=1	GPC6	555	GPC6_HUMAN		0.9308	0.999	1	1
Q9Y6W5	Q9Y6W5 WASF2_HUMAN Wiskott-Aldrich syndrome protein family member 2 OS=Homo sapiens OX=9606 GN=WASF2 PE=1 SV=3	WASF2	498	WASF2_HUMAN	Q9Y6W5-2	1	0.999	2	1
O14548	O14548 COX7R_HUMAN Cytochrome c oxidase subunit 7A-related protein, mitochondrial OS=Homo sapiens OX=9606 GN=COX7A2L PE=1 SV=2	COX7A2L	114	COX7R_HUMAN		0.9308	0.999	1	1
O60739	O60739 EIF1B_HUMAN Eukaryotic translation initiation factor 1b OS=Homo sapiens OX=9606 GN=EIF1B PE=1 SV=2	EIF1B	113	EIF1B_HUMAN		0.9986	0.999	5	1
O60921	O60921 HUS1_HUMAN Checkpoint protein HUS1 OS=Homo sapiens OX=9606 GN=HUS1 PE=1 SV=1	HUS1	280	HUS1_HUMAN		0.9997	0.999	2	1
O94829	O94829 IPO13_HUMAN Importin-13 OS=Homo sapiens OX=9606 GN=IPO13 PE=1 SV=3	IPO13	963	IPO13_HUMAN		0.9983	0.999	2	1
O95801	O95801 TTC4_HUMAN Tetratricopeptide repeat protein 4 OS=Homo sapiens OX=9606 GN=TTC4 PE=1 SV=3	TTC4	387	TTC4_HUMAN		0.9998	0.999	2	1
P17066	P17066 HSP76_HUMAN Heat shock 70 kDa protein 6 OS=Homo sapiens OX=9606 GN=HSPA6 PE=1 SV=2	HSPA6	643	HSP76_HUMAN		1	0.9989	11	1
P17661	P17661 DESM_HUMAN Desmin OS=Homo sapiens OX=9606 GN=DES PE=1 SV=3	DES	470	DESM_HUMAN		0.9994	0.9981	7	1
P20645	P20645 MPRD_HUMAN Cation-dependent mannose-6-phosphate receptor OS=Homo sapiens OX=9606 GN=M6PR PE=1 SV=1	M6PR	277	MPRD_HUMAN		1	0.999	2	1
P20933	P20933 ASPG_HUMAN N(4)-(beta-N-acetylglucosaminyl)-L-asparaginase OS=Homo sapiens OX=9606 GN=AGA PE=1 SV=2	AGA	346	ASPG_HUMAN		0.9998	0.9988	1	1
P56134-2	P56134-2 ATPK_HUMAN Isoform 2 of ATP synthase subunit f, mitochondrial OS=Homo sapiens OX=9606 GN=ATP5MF	ATP5MF	88	ATPK_HUMAN	P56134-4	0.9985	0.999	3	1
P58317	P58317 ZN121_HUMAN Zinc finger protein 121 OS=Homo sapiens OX=9606 GN=ZNF121 PE=3 SV=2	ZNF121	390	ZN121_HUMAN		1	0.999	3	1
Q13356	Q13356 PPIL2_HUMAN RING-type E3 ubiquitin-protein ligase PPIL2 OS=Homo sapiens OX=9606 GN=PPIL2 PE=1 SV=1	PPIL2	520	PPIL2_HUMAN	Q13356-2	0.9999	0.9988	2	1
Q13769	Q13769 THOC5_HUMAN THO complex subunit 5 homolog OS=Homo sapiens OX=9606 GN=THOC5 PE=1 SV=2	THOC5	683	THOC5_HUMAN		1	0.999	3	1
Q16637	Q16637 SMN_HUMAN Survival motor neuron protein OS=Homo sapiens OX=9606 GN=SMN1 PE=1 SV=1	SMN1	294	SMN_HUMAN	Q16637-3	0.9999	0.999	2	1
Q4VC31	Q4VC31 CCD58_HUMAN Coiled-coil domain-containing protein 58 OS=Homo sapiens OX=9606 GN=CCDC58 PE=1 SV=1	CCDC58	144	CCD58_HUMAN		0.9999	0.999	2	1
Q5PRF9	Q5PRF9 SMAG2_HUMAN Protein Smaug homolog 2 OS=Homo sapiens OX=9606 GN=SAMD4B PE=1 SV=1	SAMD4B	694	SMAG2_HUMAN		1	0.999	3	1
Q6I9Y2	Q6I9Y2 THOC7_HUMAN THO complex subunit 7 homolog OS=Homo sapiens OX=9606 GN=THOC7 PE=1 SV=3	THOC7	204	THOC7_HUMAN		0.997	0.999	2	1
Q712K3	Q712K3 UB2R2_HUMAN Ubiquitin-conjugating enzyme E2 R2 OS=Homo sapiens OX=9606 GN=UBE2R2 PE=1 SV=1	UBE2R2	238	UB2R2_HUMAN		1	0.999	2	1
Q7Z4Q2	Q7Z4Q2 HEAT3_HUMAN HEAT repeat-containing protein 3 OS=Homo sapiens OX=9606 GN=HEATR3 PE=1 SV=2	HEATR3	680	HEAT3_HUMAN	Q7Z4Q2-2	1	0.999	3	1
Q86V85	Q86V85 GP180_HUMAN Integral membrane protein GPR180 OS=Homo sapiens OX=9606 GN=GPR180 PE=2 SV=1	GPR180	440	GP180_HUMAN		0.9945	0.999	1	1
Q8NAT1	Q8NAT1 PMGT2_HUMAN Protein O-linked-mannose beta-1,4-N-acetylglucosaminyltransferase 2 OS=Homo sapiens OX=9606 GN=POMGNT2 PE=1 SV=1	POMGNT2	580	PMGT2_HUMAN		1	0.999	2	1
Q8TB72-3	Q8TB72-3 PUM2_HUMAN Isoform 3 of Pumilio homolog 2 OS=Homo sapiens OX=9606 GN=PUM2	PUM2	1064	PUM2_HUMAN	Q8TB72-4	0.9998	0.999	3	1
Q8WZA9	Q8WZA9 IRGQ_HUMAN Immunity-related GTPase family Q protein OS=Homo sapiens OX=9606 GN=IRGQ PE=1 SV=1	IRGQ	623	IRGQ_HUMAN		0.9999	0.9986	2	1
Q92930	Q92930 RAB8B_HUMAN Ras-related protein Rab-8B OS=Homo sapiens OX=9606 GN=RAB8B PE=1 SV=2	RAB8B	207	RAB8B_HUMAN		0.9986	0.999	6	1
Q99547	Q99547 MPH6_HUMAN M-phase phosphoprotein 6 OS=Homo sapiens OX=9606 GN=MPHOSPH6 PE=1 SV=2	MPHOSPH6	160	MPH6_HUMAN		0.9962	0.9984	2	1
Q9BVG9	Q9BVG9 PTSS2_HUMAN Phosphatidylserine synthase 2 OS=Homo sapiens OX=9606 GN=PTDSS2 PE=1 SV=1	PTDSS2	487	PTSS2_HUMAN		1	0.999	3	1
Q9C0H6	Q9C0H6 KLHL4_HUMAN Kelch-like protein 4 OS=Homo sapiens OX=9606 GN=KLHL4 PE=1 SV=2	KLHL4	718	KLHL4_HUMAN	Q9C0H6-2	1	0.999	2	1
Q9H479	Q9H479 FN3K_HUMAN Fructosamine-3-kinase OS=Homo sapiens OX=9606 GN=FN3K PE=1 SV=1	FN3K	309	FN3K_HUMAN		1	0.999	2	1
Q9HCD5	Q9HCD5 NCOA5_HUMAN Nuclear receptor coactivator 5 OS=Homo sapiens OX=9606 GN=NCOA5 PE=1 SV=2	NCOA5	579	NCOA5_HUMAN		1	0.999	3	1
Q9UHR6	Q9UHR6 ZNHI2_HUMAN Zinc finger HIT domain-containing protein 2 OS=Homo sapiens OX=9606 GN=ZNHIT2 PE=1 SV=1	ZNHIT2	403	ZNHI2_HUMAN		1	0.999	2	1
Q9ULK5	Q9ULK5 VANG2_HUMAN Vang-like protein 2 OS=Homo sapiens OX=9606 GN=VANGL2 PE=1 SV=2	VANGL2	521	VANG2_HUMAN		0.9967	0.999	2	1
Q9UPN4	Q9UPN4 CP131_HUMAN Centrosomal protein of 131 kDa OS=Homo sapiens OX=9606 GN=CEP131 PE=1 SV=3	CEP131	1083	CP131_HUMAN	Q9UPN4-2, Q9UPN4-3	1	0.999	3	1
L0R6Q1	L0R6Q1 S35U4_HUMAN SLC35A4 upstream open reading frame protein OS=Homo sapiens OX=9606 GN=SLC35A4 PE=3 SV=1	SLC35A4	103	S35U4_HUMAN		0.7956	0.9966	1	1
O14681	O14681 EI24_HUMAN Etoposide-induced protein 2.4 homolog OS=Homo sapiens OX=9606 GN=EI24 PE=1 SV=4	EI24	340	EI24_HUMAN		0.9988	0.9984	2	1
O14777	O14777 NDC80_HUMAN Kinetochore protein NDC80 homolog OS=Homo sapiens OX=9606 GN=NDC80 PE=1 SV=1	NDC80	642	NDC80_HUMAN		0.9974	0.999	2	1
O15400	O15400 STX7_HUMAN Syntaxin-7 OS=Homo sapiens OX=9606 GN=STX7 PE=1 SV=4	STX7	261	STX7_HUMAN	O15400-2	1	0.999	2	1
O43633	O43633 CHM2A_HUMAN Charged multivesicular body protein 2a OS=Homo sapiens OX=9606 GN=CHMP2A PE=1 SV=1	CHMP2A	222	CHM2A_HUMAN		0.9994	0.9988	2	1
O43815	O43815 STRN_HUMAN Striatin OS=Homo sapiens OX=9606 GN=STRN PE=1 SV=4	STRN	780	STRN_HUMAN	O43815-2	1	0.999	2	1
O43924	O43924 PDE6D_HUMAN Retinal rod rhodopsin-sensitive cGMP 3',5'-cyclic phosphodiesterase subunit delta OS=Homo sapiens OX=9606 GN=PDE6D PE=1 SV=1	PDE6D	150	PDE6D_HUMAN		0.9945	0.999	1	1
O95721	O95721 SNP29_HUMAN Synaptosomal-associated protein 29 OS=Homo sapiens OX=9606 GN=SNAP29 PE=1 SV=1	SNAP29	258	SNP29_HUMAN		1	0.999	2	1
P04216	P04216 THY1_HUMAN Thy-1 membrane glycoprotein OS=Homo sapiens OX=9606 GN=THY1 PE=1 SV=2	THY1	161	THY1_HUMAN		1	0.999	2	1
P23025	P23025 XPA_HUMAN DNA repair protein complementing XP-A cells OS=Homo sapiens OX=9606 GN=XPA PE=1 SV=1	XPA	273	XPA_HUMAN		0.9308	0.999	1	1
P28676	P28676 GRAN_HUMAN Grancalcin OS=Homo sapiens OX=9606 GN=GCA PE=1 SV=2	GCA	217	GRAN_HUMAN		1	0.999	2	1
[truncated: 85 more rows]
