# Supplementary material for: Targeting Tumour Microtubes to Disrupt Glioma Networks
Source: Research Square preprint supplement (doi:10.21203/rs.3.rs-8605748/v1), 2026-04-07
Supplement: Supplementary file 5 [file f4ff3000a1846bef6fc44721.xlsx]

## Sheet: siRNA screening 
Gene	TM Length	ATP	Nascent proteins in TM
FASTKD2	-1.68615	-1.36942	-1.19058
TRAP1	-1.43981	-1.03722	-1.15161
BID	-1.22103	-0.93092	-1.09305
DCXR	-1.19391	-0.83791	-1.01026
ME2	-0.53988	-0.57215	-0.83922
DHODH	-0.53917	-0.54558	-0.82712
HSPE1	-0.05876	-0.37284	-0.7643
LRPPRC	-0.02926	-0.33297	-0.74232
MRPS26	-0.00061	-0.22667	-0.14527
MRPS7	0.12865	-0.14695	0.4155
MMAB	0.42549	-0.05393	0.69376
C1QBP	0.53728	0.03908	0.91133
TRMT1	0.6135	0.54401	0.83273
GPD2	0.90397	0.59717	1.27249
ABCB10	1.21963	1.77977	0.59717
ATAD3A	1.07509	1.14196	1.41779
siNC	1.80497	2.32457	1.44507
