# Supplementary material for: Targeting Tumour Microtubes to Disrupt Glioma Networks
Source: Research Square preprint supplement (doi:10.21203/rs.3.rs-8605748/v1), 2026-04-07
Supplement: Supplementary file 6 [file fc4ef83f2a97804404349d15.xlsx]

## Sheet: proteomics of FASTKD2
Protein	Protein ID	Entry Name	Gene	Organism	Protein Existence	Description	Protein Probability	Top Peptide Probability	102323_gelband_1 Spectral Count	102323_gelband_2 Spectral Count
sp|Q9Y5A9|YTHD2_HUMAN	Q9Y5A9	YTHD2_HUMAN	YTHDF2	Homo sapiens	1:Experimental evidence at protein level	YTH domain-containing family protein 2	1	0.999	72	13
sp|P08670|VIME_HUMAN	P08670	VIME_HUMAN	VIM	Homo sapiens	1:Experimental evidence at protein level	Vimentin	1	0.999	66	65
sp|P13645|K1C10_HUMAN	P13645	K1C10_HUMAN	KRT10	Homo sapiens	1:Experimental evidence at protein level	Keratin, type I cytoskeletal 10	1	0.999	65	68
sp|P15924|DESP_HUMAN	P15924	DESP_HUMAN	DSP	Homo sapiens	1:Experimental evidence at protein level	Desmoplakin	1	0.999	38	42
sp|P60709|ACTB_HUMAN	P60709	ACTB_HUMAN	ACTB	Homo sapiens	1:Experimental evidence at protein level	Actin, cytoplasmic 1	1	0.999	38	38
sp|Q86YZ3|HORN_HUMAN	Q86YZ3	HORN_HUMAN	HRNR	Homo sapiens	1:Experimental evidence at protein level	Hornerin	1	0.999	31	27
sp|Q9UHB6|LIMA1_HUMAN	Q9UHB6	LIMA1_HUMAN	LIMA1	Homo sapiens	1:Experimental evidence at protein level	LIM domain and actin-binding protein 1	1	0.999	21	20
sp|P35580|MYH10_HUMAN	P35580	MYH10_HUMAN	MYH10	Homo sapiens	1:Experimental evidence at protein level	Myosin-10	1	0.9985	21	11
sp|P48634|PRC2A_HUMAN	P48634	PRC2A_HUMAN	PRRC2A	Homo sapiens	1:Experimental evidence at protein level	Protein PRRC2A	1	0.999	19	0
sp|Q16643|DREB_HUMAN	Q16643	DREB_HUMAN	DBN1	Homo sapiens	1:Experimental evidence at protein level	Drebrin	1	0.999	18	13
sp|Q9NYY8|FAKD2_HUMAN	Q9NYY8	FAKD2_HUMAN	FASTKD2	Homo sapiens	1:Experimental evidence at protein level	FAST kinase domain-containing protein 2, mitochondrial	1	0.999	18	0
sp|P02768|ALBU_HUMAN	P02768	ALBU_HUMAN	ALB	Homo sapiens	1:Experimental evidence at protein level	Albumin	1	0.999	17	26
sp|P48681|NEST_HUMAN	P48681	NEST_HUMAN	NES	Homo sapiens	1:Experimental evidence at protein level	Nestin	1	0.9981	17	19
sp|P08238|HS90B_HUMAN	P08238	HS90B_HUMAN	HSP90AB1	Homo sapiens	1:Experimental evidence at protein level	Heat shock protein HSP 90-beta	1	0.999	17	15
sp|Q86VP1|TAXB1_HUMAN	Q86VP1	TAXB1_HUMAN	TAX1BP1	Homo sapiens	1:Experimental evidence at protein level	Tax1-binding protein 1	1	0.9979	17	0
sp|P27708|PYR1_HUMAN	P27708	PYR1_HUMAN	CAD	Homo sapiens	1:Experimental evidence at protein level	CAD protein	1	0.9989	15	0
sp|P14923|PLAK_HUMAN	P14923	PLAK_HUMAN	JUP	Homo sapiens	1:Experimental evidence at protein level	Junction plakoglobin	1	0.999	14	19
sp|P68363|TBA1B_HUMAN	P68363	TBA1B_HUMAN	TUBA1B	Homo sapiens	1:Experimental evidence at protein level	Tubulin alpha-1B chain	1	0.999	14	12
sp|Q9ULV4|COR1C_HUMAN	Q9ULV4	COR1C_HUMAN	CORO1C	Homo sapiens	1:Experimental evidence at protein level	Coronin-1C	1	0.9989	13	14
sp|P25705|ATPA_HUMAN	P25705	ATPA_HUMAN	ATP5F1A	Homo sapiens	1:Experimental evidence at protein level	ATP synthase subunit alpha, mitochondrial	1	0.999	12	11
sp|Q5T749|KPRP_HUMAN	Q5T749	KPRP_HUMAN	KPRP	Homo sapiens	1:Experimental evidence at protein level	Keratinocyte proline-rich protein	1	0.9988	12	11
sp|Q04695|K1C17_HUMAN	Q04695	K1C17_HUMAN	KRT17	Homo sapiens	1:Experimental evidence at protein level	Keratin, type I cytoskeletal 17	1	0.9989	11	12
sp|P04406|G3P_HUMAN	P04406	G3P_HUMAN	GAPDH	Homo sapiens	1:Experimental evidence at protein level	Glyceraldehyde-3-phosphate dehydrogenase	1	0.999	11	11
sp|P68104|EF1A1_HUMAN	P68104	EF1A1_HUMAN	EEF1A1	Homo sapiens	1:Experimental evidence at protein level	Elongation factor 1-alpha 1	1	0.999	10	12
sp|Q7Z794|K2C1B_HUMAN	Q7Z794	K2C1B_HUMAN	KRT77	Homo sapiens	1:Experimental evidence at protein level	Keratin, type II cytoskeletal 1b	1	0.9989	10	12
sp|Q02413|DSG1_HUMAN	Q02413	DSG1_HUMAN	DSG1	Homo sapiens	1:Experimental evidence at protein level	Desmoglein-1	1	0.9989	10	11
sp|P11142|HSP7C_HUMAN	P11142	HSP7C_HUMAN	HSPA8	Homo sapiens	1:Experimental evidence at protein level	Heat shock cognate 71 kDa protein	1	0.999	10	8
sp|P05141|ADT2_HUMAN	P05141	ADT2_HUMAN	SLC25A5	Homo sapiens	1:Experimental evidence at protein level	ADP/ATP translocase 2	1	0.9974	9	6
sp|P06733|ENOA_HUMAN	P06733	ENOA_HUMAN	ENO1	Homo sapiens	1:Experimental evidence at protein level	Alpha-enolase	1	0.999	8	9
sp|P62269|RS18_HUMAN	P62269	RS18_HUMAN	RPS18	Homo sapiens	1:Experimental evidence at protein level	40S ribosomal protein S18	1	0.9982	8	6
sp|Q5D862|FILA2_HUMAN	Q5D862	FILA2_HUMAN	FLG2	Homo sapiens	1:Experimental evidence at protein level	Filaggrin-2	1	0.9989	8	6
sp|Q9UQ03|COR2B_HUMAN	Q9UQ03	COR2B_HUMAN	CORO2B	Homo sapiens	1:Experimental evidence at protein level	Coronin-2B	1	0.9989	8	6
sp|P19013|K2C4_HUMAN	P19013	K2C4_HUMAN	KRT4	Homo sapiens	1:Experimental evidence at protein level	Keratin, type II cytoskeletal 4	1	0.9911	8	0
sp|Q96SB3|NEB2_HUMAN	Q96SB3	NEB2_HUMAN	PPP1R9B	Homo sapiens	1:Experimental evidence at protein level	Neurabin-2	1	0.9945	7	1
sp|P05089|ARGI1_HUMAN	P05089	ARGI1_HUMAN	ARG1	Homo sapiens	1:Experimental evidence at protein level	Arginase-1	1	0.9973	6	7
sp|P61626|LYSC_HUMAN	P61626	LYSC_HUMAN	LYZ	Homo sapiens	1:Experimental evidence at protein level	Lysozyme C	1	0.999	6	4
sp|P05023|AT1A1_HUMAN	P05023	AT1A1_HUMAN	ATP1A1	Homo sapiens	1:Experimental evidence at protein level	Sodium/potassium-transporting ATPase subunit alpha-1	1	0.999	6	3
sp|P13646|K1C13_HUMAN	P13646	K1C13_HUMAN	KRT13	Homo sapiens	1:Experimental evidence at protein level	Keratin, type I cytoskeletal 13	1	0.9938	6	3
sp|O15143|ARC1B_HUMAN	O15143	ARC1B_HUMAN	ARPC1B	Homo sapiens	1:Experimental evidence at protein level	Actin-related protein 2/3 complex subunit 1B	1	0.9988	6	2
sp|P21796|VDAC1_HUMAN	P21796	VDAC1_HUMAN	VDAC1	Homo sapiens	1:Experimental evidence at protein level	Voltage-dependent anion-selective channel protein 1	1	0.999	6	2
sp|Q07020|RL18_HUMAN	Q07020	RL18_HUMAN	RPL18	Homo sapiens	1:Experimental evidence at protein level	60S ribosomal protein L18	1	0.9987	6	1
sp|P36873|PP1G_HUMAN	P36873	PP1G_HUMAN	PPP1CC	Homo sapiens	1:Experimental evidence at protein level	Serine/threonine-protein phosphatase PP1-gamma catalytic subunit	0.9952	0.9978	6	1
sp|P01857|IGHG1_HUMAN	P01857	IGHG1_HUMAN	IGHG1	Homo sapiens	1:Experimental evidence at protein level	Immunoglobulin heavy constant gamma 1	1	0.999	6	13
sp|P14618|KPYM_HUMAN	P14618	KPYM_HUMAN	PKM	Homo sapiens	1:Experimental evidence at protein level	Pyruvate kinase PKM	1	0.9989	5	8
sp|P68871|HBB_HUMAN	P68871	HBB_HUMAN	HBB	Homo sapiens	1:Experimental evidence at protein level	Hemoglobin subunit beta	1	0.9987	5	6
sp|O60814|H2B1K_HUMAN	O60814	H2B1K_HUMAN	H2BC12	Homo sapiens	1:Experimental evidence at protein level	Histone H2B type 1-K	1	0.9987	5	5
sp|P07195|LDHB_HUMAN	P07195	LDHB_HUMAN	LDHB	Homo sapiens	1:Experimental evidence at protein level	L-lactate dehydrogenase B chain	1	0.9981	5	5
sp|P60174-1|TPISMut_HUMAN	P60174-1	TPISMut_HUMAN	TPI1	Homo sapiens	1:Experimental evidence at protein level	Triosephosphate isomerase E105D Mutation	1	0.996	5	5
sp|Q6KB66|K2C80_HUMAN	Q6KB66	K2C80_HUMAN	KRT80	Homo sapiens	1:Experimental evidence at protein level	Keratin, type II cytoskeletal 80	1	0.9972	5	5
sp|O14974|MYPT1_HUMAN	O14974	MYPT1_HUMAN	PPP1R12A	Homo sapiens	1:Experimental evidence at protein level	Protein phosphatase 1 regulatory subunit 12A	1	0.9979	5	3
sp|P31944|CASPE_HUMAN	P31944	CASPE_HUMAN	CASP14	Homo sapiens	1:Experimental evidence at protein level	Caspase-14	1	0.9858	5	3
sp|P15880|RS2_HUMAN	P15880	RS2_HUMAN	RPS2	Homo sapiens	1:Experimental evidence at protein level	40S ribosomal protein S2	1	0.9977	5	2
sp|O43707|ACTN4_HUMAN	O43707	ACTN4_HUMAN	ACTN4	Homo sapiens	1:Experimental evidence at protein level	Alpha-actinin-4	1	0.9911	5	1
sp|P62241|RS8_HUMAN	P62241	RS8_HUMAN	RPS8	Homo sapiens	1:Experimental evidence at protein level	40S ribosomal protein S8	1	0.9973	5	0
sp|Q07955|SRSF1_HUMAN	Q07955	SRSF1_HUMAN	SRSF1	Homo sapiens	1:Experimental evidence at protein level	Serine/arginine-rich splicing factor 1	1	0.9972	5	0
sp|P62805|H4_HUMAN	P62805	H4_HUMAN	H4C16	Homo sapiens	1:Experimental evidence at protein level	Histone H4	1	0.9959	5	10
sp|O43790|KRT86_HUMAN	O43790	KRT86_HUMAN	KRT86	Homo sapiens	1:Experimental evidence at protein level	Keratin, type II cuticular Hb6	1	0.9983	4	9
sp|P59998|ARPC4_HUMAN	P59998	ARPC4_HUMAN	ARPC4	Homo sapiens	1:Experimental evidence at protein level	Actin-related protein 2/3 complex subunit 4	1	0.9989	4	6
sp|Q08188|TGM3_HUMAN	Q08188	TGM3_HUMAN	TGM3	Homo sapiens	1:Experimental evidence at protein level	Protein-glutamine gamma-glutamyltransferase E	1	0.9939	4	6
sp|P23528|COF1_HUMAN	P23528	COF1_HUMAN	CFL1	Homo sapiens	1:Experimental evidence at protein level	Cofilin-1	1	0.9972	4	5
sp|P81605|DCD_HUMAN	P81605	DCD_HUMAN	DCD	Homo sapiens	1:Experimental evidence at protein level	Dermcidin	1	0.9978	4	5
sp|Q06830|PRDX1_HUMAN	Q06830	PRDX1_HUMAN	PRDX1	Homo sapiens	1:Experimental evidence at protein level	Peroxiredoxin-1	1	0.9985	4	5
sp|P10809|CH60_HUMAN	P10809	CH60_HUMAN	HSPD1	Homo sapiens	1:Experimental evidence at protein level	60 kDa heat shock protein, mitochondrial	1	0.9983	4	4
sp|Q14247|SRC8_HUMAN	Q14247	SRC8_HUMAN	CTTN	Homo sapiens	1:Experimental evidence at protein level	Src substrate cortactin	1	0.999	4	4
sp|P04792|HSPB1_HUMAN	P04792	HSPB1_HUMAN	HSPB1	Homo sapiens	1:Experimental evidence at protein level	Heat shock protein beta-1	1	0.9978	4	3
sp|P07339|CATD_HUMAN	P07339	CATD_HUMAN	CTSD	Homo sapiens	1:Experimental evidence at protein level	Cathepsin D	1	0.9968	4	3
sp|P12273|PIP_HUMAN	P12273	PIP_HUMAN	PIP	Homo sapiens	1:Experimental evidence at protein level	Prolactin-inducible protein	1	0.9724	4	3
sp|P22735|TGM1_HUMAN	P22735	TGM1_HUMAN	TGM1	Homo sapiens	1:Experimental evidence at protein level	Protein-glutamine gamma-glutamyltransferase K	1	0.9987	4	3
sp|O15144|ARPC2_HUMAN	O15144	ARPC2_HUMAN	ARPC2	Homo sapiens	1:Experimental evidence at protein level	Actin-related protein 2/3 complex subunit 2	1	0.9651	4	2
sp|P26373|RL13_HUMAN	P26373	RL13_HUMAN	RPL13	Homo sapiens	1:Experimental evidence at protein level	60S ribosomal protein L13	1	0.9929	4	2
sp|P29508|SPB3_HUMAN	P29508	SPB3_HUMAN	SERPINB3	Homo sapiens	1:Experimental evidence at protein level	Serpin B3	1	0.9921	4	2
sp|P46782|RS5_HUMAN	P46782	RS5_HUMAN	RPS5	Homo sapiens	1:Experimental evidence at protein level	40S ribosomal protein S5	1	0.9946	4	2
sp|P47756|CAPZB_HUMAN	P47756	CAPZB_HUMAN	CAPZB	Homo sapiens	1:Experimental evidence at protein level	F-actin-capping protein subunit beta	1	0.9979	4	2
sp|P62701|RS4X_HUMAN	P62701	RS4X_HUMAN	RPS4X	Homo sapiens	1:Experimental evidence at protein level	40S ribosomal protein S4, X isoform	1	0.9987	4	2
sp|P36578|RL4_HUMAN	P36578	RL4_HUMAN	RPL4	Homo sapiens	1:Experimental evidence at protein level	60S ribosomal protein L4	1	0.9744	4	1
sp|P62424|RL7A_HUMAN	P62424	RL7A_HUMAN	RPL7A	Homo sapiens	1:Experimental evidence at protein level	60S ribosomal protein L7a	1	0.9962	4	1
sp|P62753|RS6_HUMAN	P62753	RS6_HUMAN	RPS6	Homo sapiens	1:Experimental evidence at protein level	40S ribosomal protein S6	1	0.998	4	1
sp|Q5T750|XP32_HUMAN	Q5T750	XP32_HUMAN	XP32	Homo sapiens	1:Experimental evidence at protein level	Skin-specific protein 32	1	0.9917	4	1
sp|P11940|PABP1_HUMAN	P11940	PABP1_HUMAN	PABPC1	Homo sapiens	1:Experimental evidence at protein level	Polyadenylate-binding protein 1	1	0.9939	4	0
sp|P51114|FXR1_HUMAN	P51114	FXR1_HUMAN	FXR1	Homo sapiens	1:Experimental evidence at protein level	RNA-binding protein FXR1	1	0.9984	4	0
sp|Q02878|RL6_HUMAN	Q02878	RL6_HUMAN	RPL6	Homo sapiens	1:Experimental evidence at protein level	60S ribosomal protein L6	1	0.999	4	0
sp|Q9BXK5|B2L13_HUMAN	Q9BXK5	B2L13_HUMAN	BCL2L13	Homo sapiens	1:Experimental evidence at protein level	Bcl-2-like protein 13	1	0.9916	4	0
sp|P62987|RL40_HUMAN	P62987	RL40_HUMAN	UBA52	Homo sapiens	1:Experimental evidence at protein level	Ubiquitin-60S ribosomal protein L40	1	0.9975	4	7
sp|P12277|KCRB_HUMAN	P12277	KCRB_HUMAN	CKB	Homo sapiens	1:Experimental evidence at protein level	Creatine kinase B-type	1	0.9989	3	6
sp|P68431|H31_HUMAN	P68431	H31_HUMAN	H3C12	Homo sapiens	1:Experimental evidence at protein level	Histone H3.1	1	0.999	3	6
sp|Q08554|DSC1_HUMAN	Q08554	DSC1_HUMAN	DSC1	Homo sapiens	1:Experimental evidence at protein level	Desmocollin-1	1	0.9768	3	6
sp|P62273|RS29_HUMAN	P62273	RS29_HUMAN	RPS29	Homo sapiens	1:Experimental evidence at protein level	40S ribosomal protein S29	1	0.9987	3	5
sp|P62280|RS11_HUMAN	P62280	RS11_HUMAN	RPS11	Homo sapiens	1:Experimental evidence at protein level	40S ribosomal protein S11	1	0.9967	3	5
sp|P69905|HBA_HUMAN	P69905	HBA_HUMAN	HBA2	Homo sapiens	1:Experimental evidence at protein level	Hemoglobin subunit alpha	1	0.985	3	5
sp|P61978|HNRPK_HUMAN	P61978	HNRPK_HUMAN	HNRNPK	Homo sapiens	1:Experimental evidence at protein level	Heterogeneous nuclear ribonucleoprotein K	1	0.9987	3	4
sp|P62937|PPIA_HUMAN	P62937	PPIA_HUMAN	PPIA	Homo sapiens	1:Experimental evidence at protein level	Peptidyl-prolyl cis-trans isomerase A	1	0.9839	3	4
sp|Q15323|K1H1_HUMAN	Q15323	K1H1_HUMAN	KRT31	Homo sapiens	1:Experimental evidence at protein level	Keratin, type I cuticular Ha1	1	0.9937	3	4
sp|P06576|ATPB_HUMAN	P06576	ATPB_HUMAN	ATP5F1B	Homo sapiens	1:Experimental evidence at protein level	ATP synthase subunit beta, mitochondrial	1	0.9983	3	2
sp|P62249|RS16_HUMAN	P62249	RS16_HUMAN	RPS16	Homo sapiens	1:Experimental evidence at protein level	40S ribosomal protein S16	1	0.995	3	2
sp|P62277|RS13_HUMAN	P62277	RS13_HUMAN	RPS13	Homo sapiens	1:Experimental evidence at protein level	40S ribosomal protein S13	1	0.9959	3	2
sp|Q13867|BLMH_HUMAN	Q13867	BLMH_HUMAN	BLMH	Homo sapiens	1:Experimental evidence at protein level	Bleomycin hydrolase	1	0.9884	3	2
sp|Q96C19|EFHD2_HUMAN	Q96C19	EFHD2_HUMAN	EFHD2	Homo sapiens	1:Experimental evidence at protein level	EF-hand domain-containing protein D2	1	0.9855	3	2
sp|P06396|GELS_HUMAN	P06396	GELS_HUMAN	GSN	Homo sapiens	1:Experimental evidence at protein level	Gelsolin	1	0.9838	3	1
sp|P06702|S10A9_HUMAN	P06702	S10A9_HUMAN	S100A9	Homo sapiens	1:Experimental evidence at protein level	Protein S100-A9	1	0.9736	3	1
sp|P35579|MYH9_HUMAN	P35579	MYH9_HUMAN	MYH9	Homo sapiens	1:Experimental evidence at protein level	Myosin-9	1	0.9949	3	1
sp|P46779|RL28_HUMAN	P46779	RL28_HUMAN	RPL28	Homo sapiens	1:Experimental evidence at protein level	60S ribosomal protein L28	1	0.999	3	1
sp|P48668|K2C6C_HUMAN	P48668	K2C6C_HUMAN	KRT6C	Homo sapiens	1:Experimental evidence at protein level	Keratin, type II cytoskeletal 6C	1	0.9823	3	1
sp|P05388|RLA0_HUMAN	P05388	RLA0_HUMAN	RPLP0	Homo sapiens	1:Experimental evidence at protein level	60S acidic ribosomal protein P0	1	0.9985	3	0
sp|Q02543|RL18A_HUMAN	Q02543	RL18A_HUMAN	RPL18A	Homo sapiens	1:Experimental evidence at protein level	60S ribosomal protein L18a	1	0.9987	3	0
sp|Q3SY84|K2C71_HUMAN	Q3SY84	K2C71_HUMAN	KRT71	Homo sapiens	1:Experimental evidence at protein level	Keratin, type II cytoskeletal 71	1	0.9969	3	0
sp|Q6ZVX7|FBX50_HUMAN	Q6ZVX7	FBX50_HUMAN	NCCRP1	Homo sapiens	1:Experimental evidence at protein level	F-box only protein 50	1	0.9979	3	0
sp|Q8WWI1|LMO7_HUMAN	Q8WWI1	LMO7_HUMAN	LMO7	Homo sapiens	1:Experimental evidence at protein level	LIM domain only protein 7	1	0.9874	3	0
sp|P22695|QCR2_HUMAN	P22695	QCR2_HUMAN	UQCRC2	Homo sapiens	6:Experimental evidence at protein level	Cytochrome b-c1 complex subunit 2, mitochondrial	1	0.9983	3	0
sp|P0C0S8|H2A1_HUMAN	P0C0S8	H2A1_HUMAN	H2AC17	Homo sapiens	1:Experimental evidence at protein level	Histone H2A type 1	1	0.999	3	6
sp|P20930|FILA_HUMAN	P20930	FILA_HUMAN	FLG	Homo sapiens	1:Experimental evidence at protein level	Filaggrin	1	0.999	3	5
sp|P61158|ARP3_HUMAN	P61158	ARP3_HUMAN	ACTR3	Homo sapiens	1:Experimental evidence at protein level	Actin-related protein 3	1	0.9985	3	5
sp|P02788|TRFL_HUMAN	P02788	TRFL_HUMAN	LTF	Homo sapiens	1:Experimental evidence at protein level	Lactotransferrin	1	0.9978	2	4
sp|P10412|H14_HUMAN	P10412	H14_HUMAN	H1-4	Homo sapiens	1:Experimental evidence at protein level	Histone H1.4	1	0.9977	2	4
sp|Q96P63|SPB12_HUMAN	Q96P63	SPB12_HUMAN	SERPINB12	Homo sapiens	1:Experimental evidence at protein level	Serpin B12	1	0.9989	2	4
sp|P00338|LDHA_HUMAN	P00338	LDHA_HUMAN	LDHA	Homo sapiens	1:Experimental evidence at protein level	L-lactate dehydrogenase A chain	1	0.9976	2	3
sp|P01859|IGHG2_HUMAN	P01859	IGHG2_HUMAN	IGHG2	Homo sapiens	1:Experimental evidence at protein level	Immunoglobulin heavy constant gamma 2	1	0.9966	2	3
sp|P05062|ALDOB_HUMAN	P05062	ALDOB_HUMAN	ALDOB	Homo sapiens	1:Experimental evidence at protein level	Fructose-bisphosphate aldolase B	1	0.9979	2	1
sp|P12236|ADT3_HUMAN	P12236	ADT3_HUMAN	SLC25A6	Homo sapiens	1:Experimental evidence at protein level	ADP/ATP translocase 3	1	0.9904	2	1
sp|P18669|PGAM1_HUMAN	P18669	PGAM1_HUMAN	PGAM1	Homo sapiens	1:Experimental evidence at protein level	Phosphoglycerate mutase 1	1	0.9988	2	1
sp|P39023|RL3_HUMAN	P39023	RL3_HUMAN	RPL3	Homo sapiens	1:Experimental evidence at protein level	60S ribosomal protein L3	1	0.999	2	1
sp|P42766|RL35_HUMAN	P42766	RL35_HUMAN	RPL35	Homo sapiens	1:Experimental evidence at protein level	60S ribosomal protein L35	1	0.9809	2	1
sp|P46776|RL27A_HUMAN	P46776	RL27A_HUMAN	RPL27A	Homo sapiens	1:Experimental evidence at protein level	60S ribosomal protein L27a	1	0.9964	2	1
sp|P50914|RL14_HUMAN	P50914	RL14_HUMAN	RPL14	Homo sapiens	1:Experimental evidence at protein level	60S ribosomal protein L14	1	0.9982	2	1
sp|P61160|ARP2_HUMAN	P61160	ARP2_HUMAN	ACTR2	Homo sapiens	1:Experimental evidence at protein level	Actin-related protein 2	1	0.9666	2	1
sp|P62263|RS14_HUMAN	P62263	RS14_HUMAN	RPS14	Homo sapiens	1:Experimental evidence at protein level	40S ribosomal protein S14	1	0.9968	2	1
sp|P62913|RL11_HUMAN	P62913	RL11_HUMAN	RPL11	Homo sapiens	1:Experimental evidence at protein level	60S ribosomal protein L11	1	0.9982	2	1
sp|P62917|RL8_HUMAN	P62917	RL8_HUMAN	RPL8	Homo sapiens	1:Experimental evidence at protein level	60S ribosomal protein L8	1	0.9971	2	1
sp|Q96QA5|GSDMA_HUMAN	Q96QA5	GSDMA_HUMAN	GSDMA	Homo sapiens	1:Experimental evidence at protein level	Gasdermin-A	1	0.9975	2	1
sp|Q9BQE3|TBA1C_HUMAN	Q9BQE3	TBA1C_HUMAN	TUBA1C	Homo sapiens	1:Experimental evidence at protein level	Tubulin alpha-1C chain	1	0.9979	2	1
sp|P84098|RL19_HUMAN	P84098	RL19_HUMAN	RPL19	Homo sapiens	1:Experimental evidence at protein level	60S ribosomal protein L19	0.9999	0.9891	2	1
sp|P07910|HNRPC_HUMAN	P07910	HNRPC_HUMAN	HNRNPC	Homo sapiens	1:Experimental evidence at protein level	Heterogeneous nuclear ribonucleoproteins C1/C2	0.9997	0.9744	2	1
sp|P19338|NUCL_HUMAN	P19338	NUCL_HUMAN	NCL	Homo sapiens	1:Experimental evidence at protein level	Nucleolin	0.9994	0.9989	2	1
sp|P60660|MYL6_HUMAN	P60660	MYL6_HUMAN	MYL6	Homo sapiens	1:Experimental evidence at protein level	Myosin light polypeptide 6	0.9989	0.9979	2	1
sp|P02747|C1QC_HUMAN	P02747	C1QC_HUMAN	C1QC	Homo sapiens	1:Experimental evidence at protein level	Complement C1q subcomponent subunit C	1	0.982	2	0
sp|P02790|HEMO_HUMAN	P02790	HEMO_HUMAN	HPX	Homo sapiens	1:Experimental evidence at protein level	Hemopexin	1	0.9858	2	0
sp|P06748|NPM_HUMAN	P06748	NPM_HUMAN	NPM1	Homo sapiens	1:Experimental evidence at protein level	Nucleophosmin	1	0.9851	2	0
sp|P18124|RL7_HUMAN	P18124	RL7_HUMAN	RPL7	Homo sapiens	1:Experimental evidence at protein level	60S ribosomal protein L7	1	0.9985	2	0
sp|P18621|RL17_HUMAN	P18621	RL17_HUMAN	RPL17	Homo sapiens	1:Experimental evidence at protein level	60S ribosomal protein L17	1	0.9988	2	0
sp|P28066|PSA5_HUMAN	P28066	PSA5_HUMAN	PSMA5	Homo sapiens	1:Experimental evidence at protein level	Proteasome subunit alpha type-5	1	0.9952	2	0
sp|P30048|PRDX3_HUMAN	P30048	PRDX3_HUMAN	PRDX3	Homo sapiens	1:Experimental evidence at protein level	Thioredoxin-dependent peroxide reductase, mitochondrial	1	0.9445	2	0
sp|P61247|RS3A_HUMAN	P61247	RS3A_HUMAN	RPS3A	Homo sapiens	1:Experimental evidence at protein level	40S ribosomal protein S3a	1	0.9786	2	0
sp|P62750|RL23A_HUMAN	P62750	RL23A_HUMAN	RPL23A	Homo sapiens	1:Experimental evidence at protein level	60S ribosomal protein L23a	1	0.999	2	0
sp|P62820|RAB1A_HUMAN	P62820	RAB1A_HUMAN	RAB1A	Homo sapiens	1:Experimental evidence at protein level	Ras-related protein Rab-1A	1	0.999	2	0
sp|Q7Z406|MYH14_HUMAN	Q7Z406	MYH14_HUMAN	MYH14	Homo sapiens	1:Experimental evidence at protein level	Myosin-14	1	0.9923	2	0
sp|Q92841|DDX17_HUMAN	Q92841	DDX17_HUMAN	DDX17	Homo sapiens	1:Experimental evidence at protein level	Probable ATP-dependent RNA helicase DDX17	1	0.9951	2	0
sp|P00505|AATM_HUMAN	P00505	AATM_HUMAN	GOT2	Homo sapiens	1:Experimental evidence at protein level	Aspartate aminotransferase, mitochondrial	0.9999	0.9977	2	0
sp|P84103|SRSF3_HUMAN	P84103	SRSF3_HUMAN	SRSF3	Homo sapiens	1:Experimental evidence at protein level	Serine/arginine-rich splicing factor 3	0.9995	0.983	2	0
sp|P26368|U2AF2_HUMAN	P26368	U2AF2_HUMAN	U2AF2	Homo sapiens	1:Experimental evidence at protein level	Splicing factor U2AF 65 kDa subunit	0.9994	0.9888	2	0
sp|P62888|RL30_HUMAN	P62888	RL30_HUMAN	RPL30	Homo sapiens	1:Experimental evidence at protein level	60S ribosomal protein L30	0.9993	0.9897	2	0
sp|P52597|HNRPF_HUMAN	P52597	HNRPF_HUMAN	HNRNPF	Homo sapiens	1:Experimental evidence at protein level	Heterogeneous nuclear ribonucleoprotein F	0.9991	0.9688	2	0
sp|P35637|FUS_HUMAN	P35637	FUS_HUMAN	FUS	Homo sapiens	1:Experimental evidence at protein level	RNA-binding protein FUS	0.9983	0.992	2	0
sp|P61353|RL27_HUMAN	P61353	RL27_HUMAN	RPL27	Homo sapiens	1:Experimental evidence at protein level	60S ribosomal protein L27	0.9982	0.9885	2	0
sp|O75342|LX12B_HUMAN	O75342	LX12B_HUMAN	ALOX12B	Homo sapiens	1:Experimental evidence at protein level	Arachidonate 12-lipoxygenase, 12R-type	0.9981	0.999	2	0
sp|Q07666|KHDR1_HUMAN	Q07666	KHDR1_HUMAN	KHDRBS1	Homo sapiens	1:Experimental evidence at protein level	KH domain-containing, RNA-binding, signal transduction-associated protein 1	0.998	0.9966	2	0
sp|P49207|RL34_HUMAN	P49207	RL34_HUMAN	RPL34	Homo sapiens	1:Experimental evidence at protein level	60S ribosomal protein L34	0.9965	0.9719	2	0
sp|Q12849|GRSF1_HUMAN	Q12849	GRSF1_HUMAN	GRSF1	Homo sapiens	4:Experimental evidence at protein level	G-rich sequence factor 1	1	0.9491	2	0
sp|P40925|MDHC_HUMAN	P40925	MDHC_HUMAN	MDH1	Homo sapiens	8:Experimental evidence at protein level	Malate dehydrogenase, cytoplasmic	1	0.9596	2	0
sp|Q7Z3C6|ATG9A_HUMAN	Q7Z3C6	ATG9A_HUMAN	ATG9A	Homo sapiens	9:Experimental evidence at protein level	Autophagy-related protein 9A	1	0.9486	2	0
sp|P55899|FCGRN_HUMAN	P55899	FCGRN_HUMAN	FCGRT	Homo sapiens	10:Experimental evidence at protein level	IgG receptor FcRn large subunit p51	1	0.999	2	0
sp|P07900|HS90A_HUMAN	P07900	HS90A_HUMAN	HSP90AA1	Homo sapiens	1:Experimental evidence at protein level	Heat shock protein HSP 90-alpha	1	0.999	2	6
sp|P13639|EF2_HUMAN	P13639	EF2_HUMAN	EEF2	Homo sapiens	1:Experimental evidence at protein level	Elongation factor 2	1	0.999	2	5
sp|P00558|PGK1_HUMAN	P00558	PGK1_HUMAN	PGK1	Homo sapiens	1:Experimental evidence at protein level	Phosphoglycerate kinase 1	1	0.999	2	3
sp|P04075|ALDOA_HUMAN	P04075	ALDOA_HUMAN	ALDOA	Homo sapiens	1:Experimental evidence at protein level	Fructose-bisphosphate aldolase A	1	0.9979	2	3
sp|P22626|ROA2_HUMAN	P22626	ROA2_HUMAN	HNRNPA2B1	Homo sapiens	1:Experimental evidence at protein level	Heterogeneous nuclear ribonucleoproteins A2/B1	1	0.9982	2	3
sp|P47929|LEG7_HUMAN	P47929	LEG7_HUMAN	LGALS7B	Homo sapiens	1:Experimental evidence at protein level	Galectin-7	1	0.9956	1	3
sp|P62266|RS23_HUMAN	P62266	RS23_HUMAN	RPS23	Homo sapiens	1:Experimental evidence at protein level	40S ribosomal protein S23	1	0.9838	1	3
sp|P10599|THIO_HUMAN	P10599	THIO_HUMAN	TXN	Homo sapiens	1:Experimental evidence at protein level	Thioredoxin	1	0.9972	1	2
sp|P11021|BIP_HUMAN	P11021	BIP_HUMAN	HSPA5	Homo sapiens	1:Experimental evidence at protein level	Endoplasmic reticulum chaperone BiP	1	0.9914	1	2
sp|P40925|MDHC_HUMAN	P40925	MDHC_HUMAN	MDH1	Homo sapiens	1:Experimental evidence at protein level	Malate dehydrogenase, cytoplasmic	1	0.9988	1	2
sp|Q00839|HNRPU_HUMAN	Q00839	HNRPU_HUMAN	HNRNPU	Homo sapiens	1:Experimental evidence at protein level	Heterogeneous nuclear ribonucleoprotein U	1	0.9692	1	2
sp|Q6UWP8|SBSN_HUMAN	Q6UWP8	SBSN_HUMAN	SBSN	Homo sapiens	1:Experimental evidence at protein level	Suprabasin	1	0.9952	1	2
sp|P16104|H2AX_HUMAN	P16104	H2AX_HUMAN	H2AX	Homo sapiens	1:Experimental evidence at protein level	Histone H2AX	0.9999	0.9985	1	2
sp|P29966|MARCS_HUMAN	P29966	MARCS_HUMAN	MARCKS	Homo sapiens	1:Experimental evidence at protein level	Myristoylated alanine-rich C-kinase substrate	0.9996	0.9876	1	2
sp|P62891|RL39_HUMAN	P62891	RL39_HUMAN	RPL39	Homo sapiens	1:Experimental evidence at protein level	60S ribosomal protein L39	0.9996	0.9863	1	2
sp|P40926|MDHM_HUMAN	P40926	MDHM_HUMAN	MDH2	Homo sapiens	1:Experimental evidence at protein level	Malate dehydrogenase, mitochondrial	0.9994	0.9959	1	2
sp|P46783|RS10_HUMAN	P46783	RS10_HUMAN	RPS10	Homo sapiens	1:Experimental evidence at protein level	40S ribosomal protein S10	0.9991	0.9985	1	2
sp|P01834|IGKC_HUMAN	P01834	IGKC_HUMAN	IGKC	Homo sapiens	1:Experimental evidence at protein level	Immunoglobulin kappa constant	1	0.9737	1	1
sp|P25311|ZA2G_HUMAN	P25311	ZA2G_HUMAN	AZGP1	Homo sapiens	1:Experimental evidence at protein level	Zinc-alpha-2-glycoprotein	1	0.9781	1	1
sp|P38646|GRP75_HUMAN	P38646	GRP75_HUMAN	HSPA9	Homo sapiens	1:Experimental evidence at protein level	Stress-70 protein, mitochondrial	1	0.9897	1	1
sp|P39019|RS19_HUMAN	P39019	RS19_HUMAN	RPS19	Homo sapiens	1:Experimental evidence at protein level	40S ribosomal protein S19	1	0.9807	1	1
sp|P68371|TBB4B_HUMAN	P68371	TBB4B_HUMAN	TUBB4B	Homo sapiens	1:Experimental evidence at protein level	Tubulin beta-4B chain	1	0.9878	1	1
sp|Q9HCY8|S10AE_HUMAN	Q9HCY8	S10AE_HUMAN	S100A14	Homo sapiens	1:Experimental evidence at protein level	Protein S100-A14	1	0.9987	1	1
sp|O15145|ARPC3_HUMAN	O15145	ARPC3_HUMAN	ARPC3	Homo sapiens	1:Experimental evidence at protein level	Actin-related protein 2/3 complex subunit 3	0.9999	0.9931	1	1
sp|P04259|K2C6B_HUMAN	P04259	K2C6B_HUMAN	KRT6B	Homo sapiens	1:Experimental evidence at protein level	Keratin, type II cytoskeletal 6B	0.9999	0.9956	1	1
sp|P28799|GRN_HUMAN	P28799	GRN_HUMAN	GRN	Homo sapiens	1:Experimental evidence at protein level	Progranulin	0.9999	0.9954	1	1
sp|Q6NYC8|PPR18_HUMAN	Q6NYC8	PPR18_HUMAN	PPP1R18	Homo sapiens	1:Experimental evidence at protein level	Phostensin	0.9998	0.9963	1	1
sp|O95678|K2C75_HUMAN	O95678	K2C75_HUMAN	KRT75	Homo sapiens	1:Experimental evidence at protein level	Keratin, type II cytoskeletal 75	0.9992	0.9978	1	1
sp|Q00325|MPCP_HUMAN	Q00325	MPCP_HUMAN	SLC25A3	Homo sapiens	1:Experimental evidence at protein level	Phosphate carrier protein, mitochondrial	0.9977	0.9961	1	1
sp|P06899|H2B1J_HUMAN	P06899	H2B1J_HUMAN	H2BC11	Homo sapiens	1:Experimental evidence at protein level	Histone H2B type 1-J	0.9886	0.999	1	1
sp|P62136|PP1A_HUMAN	P62136	PP1A_HUMAN	PPP1CA	Homo sapiens	1:Experimental evidence at protein level	Serine/threonine-protein phosphatase PP1-alpha catalytic subunit	0.988	0.9347	1	1
sp|P28331|NDUS1_HUMAN	P28331	NDUS1_HUMAN	NDUFS1	Homo sapiens	1:Experimental evidence at protein level	NADH-ubiquinone oxidoreductase 75 kDa subunit, mitochondrial	0.9793	0.9954	1	1
sp|P63244|RACK1_HUMAN	P63244	RACK1_HUMAN	RACK1	Homo sapiens	1:Experimental evidence at protein level	Receptor of activated protein C kinase 1	0.9791	0.9937	1	1
sp|P47755|CAZA2_HUMAN	P47755	CAZA2_HUMAN	CAPZA2	Homo sapiens	1:Experimental evidence at protein level	F-actin-capping protein subunit alpha-2	0.9759	0.964	1	1
sp|P17066|HSP76_HUMAN	P17066	HSP76_HUMAN	HSPA6	Homo sapiens	1:Experimental evidence at protein level	Heat shock 70 kDa protein 6	0.9752	0.9823	1	1
sp|P0DOY2|IGLC2_HUMAN	P0DOY2	IGLC2_HUMAN	IGLC2	Homo sapiens	1:Experimental evidence at protein level	Immunoglobulin lambda constant 2	0.9749	0.9615	1	1
sp|P31930|QCR1_HUMAN	P31930	QCR1_HUMAN	UQCRC1	Homo sapiens	1:Experimental evidence at protein level	Cytochrome b-c1 complex subunit 1, mitochondrial	0.9327	0.999	1	1
sp|A0A0B4J2D9|KVD13_HUMAN	A0A0B4J2D9	KVD13_HUMAN	IGKV1D-13	Homo sapiens	3:Protein inferred from homology	Immunoglobulin kappa variable 1D-13	0.9132	0.999	1	1
sp|A0A075B6I1|LV460_HUMAN	A0A075B6I1	LV460_HUMAN	IGLV4-60	Homo sapiens	3:Protein inferred from homology	Immunoglobulin lambda variable 4-60	0.8934	0.9662	1	1
sp|O15511|ARPC5_HUMAN	O15511	ARPC5_HUMAN	ARPC5	Homo sapiens	1:Experimental evidence at protein level	Actin-related protein 2/3 complex subunit 5	0.8904	0.9683	1	1
sp|P07737|PROF1_HUMAN	P07737	PROF1_HUMAN	PFN1	Homo sapiens	1:Experimental evidence at protein level	Profilin-1	0.8883	0.9945	1	1
sp|Q6P5R6|RL22L_HUMAN	Q6P5R6	RL22L_HUMAN	RPL22L1	Homo sapiens	1:Experimental evidence at protein level	60S ribosomal protein L22-like 1	0.8171	0.9966	1	1
sp|P62826|RAN_HUMAN	P62826	RAN_HUMAN	RAN	Homo sapiens	1:Experimental evidence at protein level	GTP-binding nuclear protein Ran	0.769	0.9955	1	1
sp|P42677|RS27_HUMAN	P42677	RS27_HUMAN	RPS27	Homo sapiens	1:Experimental evidence at protein level	40S ribosomal protein S27	0.7314	0.9944	1	1
sp|P15531|NDKA_HUMAN	P15531	NDKA_HUMAN	NME1	Homo sapiens	1:Experimental evidence at protein level	Nucleoside diphosphate kinase A	0.689	0.9942	1	1
sp|Q14574|DSC3_HUMAN	Q14574	DSC3_HUMAN	DSC3	Homo sapiens	1:Experimental evidence at protein level	Desmocollin-3	0.6889	0.9941	1	1
sp|P62829|RL23_HUMAN	P62829	RL23_HUMAN	RPL23	Homo sapiens	1:Experimental evidence at protein level	60S ribosomal protein L23	0.6538	0.9895	1	1
sp|P23490|LORI_HUMAN	P23490	LORI_HUMAN	LORICRIN	Homo sapiens	1:Experimental evidence at protein level	Loricrin	0.6276	0.9859	1	1
sp|P47914|RL29_HUMAN	P47914	RL29_HUMAN	RPL29	Homo sapiens	1:Experimental evidence at protein level	60S ribosomal protein L29	0.6223	0.9829	1	1
sp|P08708|RS17_HUMAN	P08708	RS17_HUMAN	RPS17	Homo sapiens	1:Experimental evidence at protein level	40S ribosomal protein S17	1	0.979	1	0
sp|Q7Z460|CLAP1_HUMAN	Q7Z460	CLAP1_HUMAN	CLASP1	Homo sapiens	1:Experimental evidence at protein level	CLIP-associating protein 1	0.9999	0.979	1	0
sp|P01593|KVD33_HUMAN	P01593	KVD33_HUMAN	IGKV1D-33	Homo sapiens	1:Experimental evidence at protein level	Immunoglobulin kappa variable 1D-33	0.9997	0.9755	1	0
sp|P38606|VATA_HUMAN	P38606	VATA_HUMAN	ATP6V1A	Homo sapiens	1:Experimental evidence at protein level	V-type proton ATPase catalytic subunit A	0.9988	0.9726	1	0
sp|Q14CN4|K2C72_HUMAN	Q14CN4	K2C72_HUMAN	KRT72	Homo sapiens	1:Experimental evidence at protein level	Keratin, type II cytoskeletal 72	0.9983	0.972	1	0
sp|P61313|RL15_HUMAN	P61313	RL15_HUMAN	RPL15	Homo sapiens	1:Experimental evidence at protein level	60S ribosomal protein L15	0.9974	0.9975	1	0
sp|P40429|RL13A_HUMAN	P40429	RL13A_HUMAN	RPL13A	Homo sapiens	1:Experimental evidence at protein level	60S ribosomal protein L13a	0.9964	0.9629	1	0
sp|Q01130|SRSF2_HUMAN	Q01130	SRSF2_HUMAN	SRSF2	Homo sapiens	1:Experimental evidence at protein level	Serine/arginine-rich splicing factor 2	0.9952	0.9988	1	0
sp|O43166|SI1L1_HUMAN	O43166	SI1L1_HUMAN	SIPA1L1	Homo sapiens	1:Experimental evidence at protein level	Signal-induced proliferation-associated 1-like protein 1	0.9902	0.9852	1	0
sp|P07954|FUMH_HUMAN	P07954	FUMH_HUMAN	FH	Homo sapiens	1:Experimental evidence at protein level	Fumarate hydratase, mitochondrial	0.9793	0.9843	1	0
sp|Q9NQW7|XPP1_HUMAN	Q9NQW7	XPP1_HUMAN	XPNPEP1	Homo sapiens	1:Experimental evidence at protein level	Xaa-Pro aminopeptidase 1	0.9793	0.979	1	0
sp|Q99714|HCD2_HUMAN	Q99714	HCD2_HUMAN	HSD17B10	Homo sapiens	1:Experimental evidence at protein level	3-hydroxyacyl-CoA dehydrogenase type-2	0.9792	0.971	1	0
sp|P60900|PSA6_HUMAN	P60900	PSA6_HUMAN	PSMA6	Homo sapiens	1:Experimental evidence at protein level	Proteasome subunit alpha type-6	0.9788	0.9634	1	0
sp|Q9NUB1|ACS2L_HUMAN	Q9NUB1	ACS2L_HUMAN	ACSS1	Homo sapiens	1:Experimental evidence at protein level	Acetyl-coenzyme A synthetase 2-like, mitochondrial	0.975	0.9587	1	0
sp|P15311|EZRI_HUMAN	P15311	EZRI_HUMAN	EZR	Homo sapiens	1:Experimental evidence at protein level	Ezrin	0.9613	0.999	1	0
sp|P21695|GPDA_HUMAN	P21695	GPDA_HUMAN	GPD1	Homo sapiens	1:Experimental evidence at protein level	Glycerol-3-phosphate dehydrogenase [NAD(+)], cytoplasmic	0.9589	0.999	1	0
sp|Q12906|ILF3_HUMAN	Q12906	ILF3_HUMAN	ILF3	Homo sapiens	1:Experimental evidence at protein level	Interleukin enhancer-binding factor 3	0.9449	0.999	1	0
sp|P22531|SPR2E_HUMAN	P22531	SPR2E_HUMAN	SPRR2E	Homo sapiens	2:Experimental evidence at transcript level	Small proline-rich protein 2E	0.9335	0.999	1	0
sp|Q9BVK6|TMED9_HUMAN	Q9BVK6	TMED9_HUMAN	TMED9	Homo sapiens	1:Experimental evidence at protein level	Transmembrane emp24 domain-containing protein 9	0.9222	0.9988	1	0
sp|P23526|SAHH_HUMAN	P23526	SAHH_HUMAN	AHCY	Homo sapiens	1:Experimental evidence at protein level	Adenosylhomocysteinase	0.918	0.9981	1	0
sp|P31151|S10A7_HUMAN	P31151	S10A7_HUMAN	S100A7	Homo sapiens	1:Experimental evidence at protein level	Protein S100-A7	0.9119	0.998	1	0
sp|P55072|TERA_HUMAN	P55072	TERA_HUMAN	VCP	Homo sapiens	1:Experimental evidence at protein level	Transitional endoplasmic reticulum ATPase	0.8941	0.9972	1	0
sp|P13804|ETFA_HUMAN	P13804	ETFA_HUMAN	ETFA	Homo sapiens	1:Experimental evidence at protein level	Electron transfer flavoprotein subunit alpha, mitochondrial	0.8924	0.9966	1	0
sp|O14975|S27A2_HUMAN	O14975	S27A2_HUMAN	SLC27A2	Homo sapiens	1:Experimental evidence at protein level	Long-chain fatty acid transport protein 2	0.8907	0.996	1	0
sp|Q9UH99|SUN2_HUMAN	Q9UH99	SUN2_HUMAN	SUN2	Homo sapiens	1:Experimental evidence at protein level	SUN domain-containing protein 2	0.8438	0.9958	1	0
sp|Q9Y3U8|RL36_HUMAN	Q9Y3U8	RL36_HUMAN	RPL36	Homo sapiens	1:Experimental evidence at protein level	60S ribosomal protein L36	0.8002	0.9954	1	0
sp|Q9Y697|NFS1_HUMAN	Q9Y697	NFS1_HUMAN	NFS1	Homo sapiens	1:Experimental evidence at protein level	Cysteine desulfurase, mitochondrial	0.7526	0.9944	1	0
sp|P60953|CDC42_HUMAN	P60953	CDC42_HUMAN	CDC42	Homo sapiens	1:Experimental evidence at protein level	Cell division control protein 42 homolog	0.7221	0.9943	1	0
sp|P63173|RL38_HUMAN	P63173	RL38_HUMAN	RPL38	Homo sapiens	1:Experimental evidence at protein level	60S ribosomal protein L38	0.7214	0.9942	1	0
sp|O14950|ML12B_HUMAN	O14950	ML12B_HUMAN	MYL12B	Homo sapiens	1:Experimental evidence at protein level	Myosin regulatory light chain 12B	0.7045	0.9913	1	0
sp|A6NKH3|RL37L_HUMAN	A6NKH3	RL37L_HUMAN	RPL37AP8	Homo sapiens	5:Protein uncertain	Putative 60S ribosomal protein L37a-like protein	0.6984	0.9883	1	0
sp|P16520|GBB3_HUMAN	P16520	GBB3_HUMAN	GNB3	Homo sapiens	1:Experimental evidence at protein level	Guanine nucleotide-binding protein G(I)/G(S)/G(T) subunit beta-3	0.6972	0.9846	1	0
sp|Q6PI48|SYDM_HUMAN	Q6PI48	SYDM_HUMAN	DARS2	Homo sapiens	1:Experimental evidence at protein level	Aspartate--tRNA ligase, mitochondrial	1	0.982	1	0
sp|Q9Y2Z4|SYYM_HUMAN	Q9Y2Z4	SYYM_HUMAN	YARS2	Homo sapiens	2:Experimental evidence at protein level	Tyrosine--tRNA ligase, mitochondrial	1	0.982	1	0
sp|Q9BQ52|RNZ2_HUMAN	Q9BQ52	RNZ2_HUMAN	ELAC2	Homo sapiens	3:Experimental evidence at protein level	Zinc phosphodiesterase ELAC protein 2	1	0.9805	1	0
sp|Q969Z0|FAKD4_HUMAN	Q969Z0	FAKD4_HUMAN	TBRG4	Homo sapiens	5:Experimental evidence at protein level	FAST kinase domain-containing protein 4	1	0.9799	1	0
sp|P51398|RT29_HUMAN	P51398	RT29_HUMAN	DAP3	Homo sapiens	7:Experimental evidence at protein level	28S ribosomal protein S29, mitochondrial	1	0.9798	1	0
sp|O43432|IF4G3_HUMAN	O43432	IF4G3_HUMAN	EIF4G3	Homo sapiens	11:Experimental evidence at protein level	Eukaryotic translation initiation factor 4 gamma 3	1	0.999	1	0
sp|Q00059|TFAM_HUMAN	Q00059	TFAM_HUMAN	TFAM	Homo sapiens	12:Experimental evidence at protein level	Transcription factor A, mitochondrial	1	0.999	1	0
sp|P29373|RABP2_HUMAN	P29373	RABP2_HUMAN	CRABP2	Homo sapiens	13:Experimental evidence at protein level	Cellular retinoic acid-binding protein 2	1	0.999	1	0
sp|P49411|EFTU_HUMAN	P49411	EFTU_HUMAN	TUFM	Homo sapiens	14:Experimental evidence at protein level	Elongation factor Tu, mitochondrial	1	0.9981	1	0
sp|Q86XP3|DDX42_HUMAN	Q86XP3	DDX42_HUMAN	DDX42	Homo sapiens	15:Experimental evidence at protein level	ATP-dependent RNA helicase DDX42	1	0.999	1	0
sp|P02545|LMNA_HUMAN	P02545	LMNA_HUMAN	LMNA	Homo sapiens	1:Experimental evidence at protein level	Prelamin-A/C	1	0.9989	1	14
sp|P27694|RFA1_HUMAN	P27694	RFA1_HUMAN	RPA1	Homo sapiens	1:Experimental evidence at protein level	Replication protein A 70 kDa DNA-binding subunit	1	0.9975	1	9
sp|P01876|IGHA1_HUMAN	P01876	IGHA1_HUMAN	IGHA1	Homo sapiens	1:Experimental evidence at protein level	Immunoglobulin heavy constant alpha 1	1	0.9924	1	4
sp|P14625|ENPL_HUMAN	P14625	ENPL_HUMAN	HSP90B1	Homo sapiens	1:Experimental evidence at protein level	Endoplasmin	1	0.9988	1	3
sp|Q04837|SSBP_HUMAN	Q04837	SSBP_HUMAN	SSBP1	Homo sapiens	1:Experimental evidence at protein level	Single-stranded DNA-binding protein, mitochondrial	1	0.999	1	3
sp|A0A0C4DH72|KV106_HUMAN	A0A0C4DH72	KV106_HUMAN	IGKV1-6	Homo sapiens	3:Protein inferred from homology	Immunoglobulin kappa variable 1-6	0.9998	0.9896	1	3
sp|P61981|1433G_HUMAN	P61981	1433G_HUMAN	YWHAG	Homo sapiens	1:Experimental evidence at protein level	14-3-3 protein gamma	0.9998	0.9741	1	3
sp|P06454|PTMA_HUMAN	P06454	PTMA_HUMAN	PTMA	Homo sapiens	1:Experimental evidence at protein level	Prothymosin alpha	1	0.9989	1	2
sp|P09874|PARP1_HUMAN	P09874	PARP1_HUMAN	PARP1	Homo sapiens	1:Experimental evidence at protein level	Poly [ADP-ribose] polymerase 1	0.9999	0.9918	1	2
sp|P42167|LAP2B_HUMAN	P42167	LAP2B_HUMAN	TMPO	Homo sapiens	1:Experimental evidence at protein level	Lamina-associated polypeptide 2, isoforms beta/gamma	0.9998	0.9968	1	2
sp|P06753|TPM3_HUMAN	P06753	TPM3_HUMAN	TPM3	Homo sapiens	1:Experimental evidence at protein level	Tropomyosin alpha-3 chain	1	0.9701	1	1
sp|P01040|CYTA_HUMAN	P01040	CYTA_HUMAN	CSTA	Homo sapiens	1:Experimental evidence at protein level	Cystatin-A	0.9996	0.997	1	1
sp|P63104|1433Z_HUMAN	P63104	1433Z_HUMAN	YWHAZ	Homo sapiens	1:Experimental evidence at protein level	14-3-3 protein zeta/delta	0.999	0.9988	1	1
sp|Q15365|PCBP1_HUMAN	Q15365	PCBP1_HUMAN	PCBP1	Homo sapiens	1:Experimental evidence at protein level	Poly(rC)-binding protein 1	0.9951	0.9698	1	1
sp|O43175|SERA_HUMAN	O43175	SERA_HUMAN	PHGDH	Homo sapiens	1:Experimental evidence at protein level	D-3-phosphoglycerate dehydrogenase	0.9937	0.9683	1	1
sp|P62854|RS26_HUMAN	P62854	RS26_HUMAN	RPS26	Homo sapiens	1:Experimental evidence at protein level	40S ribosomal protein S26	0.9917	0.957	1	1
sp|O43809|CPSF5_HUMAN	O43809	CPSF5_HUMAN	NUDT21	Homo sapiens	1:Experimental evidence at protein level	Cleavage and polyadenylation specificity factor subunit 5	0.9909	0.9402	1	1
sp|Q6S8J3|POTEE_HUMAN	Q6S8J3	POTEE_HUMAN	POTEE	Homo sapiens	2:Experimental evidence at transcript level	POTE ankyrin domain family member E	0.9833	0.9747	1	1
sp|P04746|AMYP_HUMAN	P04746	AMYP_HUMAN	AMY2A	Homo sapiens	1:Experimental evidence at protein level	Pancreatic alpha-amylase	0.9813	0.935	1	1
sp|P31947|1433S_HUMAN	P31947	1433S_HUMAN	SFN	Homo sapiens	1:Experimental evidence at protein level	14-3-3 protein sigma	0.9709	0.9594	1	1
sp|P0CF74|IGLC6_HUMAN	P0CF74	IGLC6_HUMAN	IGLC6	Homo sapiens	1:Experimental evidence at protein level	Immunoglobulin lambda constant 6	0.9666	0.9675	1	1
sp|P28070|PSB4_HUMAN	P28070	PSB4_HUMAN	PSMB4	Homo sapiens	1:Experimental evidence at protein level	Proteasome subunit beta type-4	0.9109	0.9954	1	1
sp|P12956|XRCC6_HUMAN	P12956	XRCC6_HUMAN	XRCC6	Homo sapiens	1:Experimental evidence at protein level	X-ray repair cross-complementing protein 6	0.8523	0.9918	1	1
sp|P11279|LAMP1_HUMAN	P11279	LAMP1_HUMAN	LAMP1	Homo sapiens	1:Experimental evidence at protein level	Lysosome-associated membrane glycoprotein 1	0.8024	0.9884	1	1
sp|P62861|RS30_HUMAN	P62861	RS30_HUMAN	FAU	Homo sapiens	1:Experimental evidence at protein level	FAU ubiquitin-like and ribosomal protein S30	0.7461	0.9841	1	1
sp|P13010|XRCC5_HUMAN	P13010	XRCC5_HUMAN	XRCC5	Homo sapiens	1:Experimental evidence at protein level	X-ray repair cross-complementing protein 5	0.6322	0.9731	1	1
sp|Q96FX8|PERP_HUMAN	Q96FX8	PERP_HUMAN	PERP	Homo sapiens	1:Experimental evidence at protein level	p53 apoptosis effector related to PMP-22	0.6315	0.973	1	1
sp|Q9H3U5|MFSD1_HUMAN	Q9H3U5	MFSD1_HUMAN	MFSD1	Homo sapiens	2:Experimental evidence at transcript level	Major facilitator superfamily domain-containing protein 1	0.6307	0.9729	1	1
sp|A0A075B6K2|LV312_HUMAN	A0A075B6K2	LV312_HUMAN	IGLV3-12	Homo sapiens	3:Protein inferred from homology	Immunoglobulin lambda variable 3-12	0.6207	0.9718	1	1
sp|P62899|RL31_HUMAN	P62899	RL31_HUMAN	RPL31	Homo sapiens	1:Experimental evidence at protein level	60S ribosomal protein L31	0.6145	0.9711	1	1
sp|P62081|RS7_HUMAN	P62081	RS7_HUMAN	RPS7	Homo sapiens	1:Experimental evidence at protein level	40S ribosomal protein S7	0.5794	0.9667	1	1
sp|Q92747|ARC1A_HUMAN	Q92747	ARC1A_HUMAN	ARPC1A	Homo sapiens	1:Experimental evidence at protein level	Actin-related protein 2/3 complex subunit 1A	0.5283	0.9593	1	1
sp|Q8TF72|SHRM3_HUMAN	Q8TF72	SHRM3_HUMAN	SHROOM3	Homo sapiens	1:Experimental evidence at protein level	Protein Shroom3	0.4872	0.9524	1	1
sp|P59665|DEF1_HUMAN	P59665	DEF1_HUMAN	DEFA1B	Homo sapiens	1:Experimental evidence at protein level	Neutrophil defensin 1	0.4742	0.95	1	1
sp|P05090|APOD_HUMAN	P05090	APOD_HUMAN	APOD	Homo sapiens	1:Experimental evidence at protein level	Apolipoprotein D	0.4589	0.9469	1	1
sp|P17096|HMGA1_HUMAN	P17096	HMGA1_HUMAN	HMGA1	Homo sapiens	1:Experimental evidence at protein level	High mobility group protein HMG-I/HMG-Y	0.4371	0.9423	1	1
sp|Q96DB9|FXYD5_HUMAN	Q96DB9	FXYD5_HUMAN	FXYD5	Homo sapiens	1:Experimental evidence at protein level	FXYD domain-containing ion transport regulator 5	0.4256	0.9397	1	1
sp|A0A075B6P5|KV228_HUMAN	A0A075B6P5	KV228_HUMAN	IGKV2-28	Homo sapiens	3:Protein inferred from homology	Immunoglobulin kappa variable 2-28	0.4151	0.9373	1	1

## Sheet: FASTKD2 correlation
Var1	Var2	cor	p_value
FASTKD2	FASTKD2	1	0
FASTKD2	PPP1CC	0.894228	0
FASTKD2	HNRNPK	0.891783	0
FASTKD2	TAX1BP1	0.88567	0
FASTKD2	NCL	0.874849	4.15015142506647e-322
FASTKD2	RAB1A	0.873781	2.34187116128751e-320
FASTKD2	NPM1	0.85992	5.31e-299
FASTKD2	XRCC5	0.855867	3.46e-293
FASTKD2	KHDRBS1	0.853065	2.85e-289
FASTKD2	RPA1	0.851216	9.88e-287
FASTKD2	YTHDF2	0.850671	5.46e-286
FASTKD2	MFSD1	0.847926	2.69e-282
FASTKD2	HNRNPU	0.832365	1.16e-262
FASTKD2	YWHAZ	0.824111	4.76e-253
FASTKD2	RAN	0.821359	5.91e-250
FASTKD2	PRDX3	0.815448	1.73e-243
FASTKD2	HSPA5	0.811384	3.56e-239
FASTKD2	VCP	0.809206	6.62e-237
FASTKD2	LIMA1	0.801635	3.05e-229
FASTKD2	HSPA9	0.80043	4.73e-228
FASTKD2	VDAC1	0.794062	6.7e-222
FASTKD2	HNRNPA2B1	0.789832	6.22e-218
FASTKD2	PCBP1	0.782692	1.93e-211
FASTKD2	RPN1	0.762594	2.05e-194
FASTKD2	HNRNPC	0.762484	2.51e-194
FASTKD2	YWHAE	0.751061	2.16e-185
FASTKD2	NUDT21	0.748743	1.23e-183
FASTKD2	PGK1	0.745054	6.93e-181
FASTKD2	PTMA	0.740912	7.49e-178
FASTKD2	SLC25A5	0.73679	6.85e-175
FASTKD2	PCMT1	0.733882	7.8e-173
FASTKD2	HNRNPF	0.729543	8.13e-170
FASTKD2	RPL14	0.716941	2.25e-161
FASTKD2	TPM3	0.715865	1.13e-160
FASTKD2	MYL12B	0.711608	6.12e-158
FASTKD2	PARP1	0.710343	3.89e-157
FASTKD2	RPL15	0.701906	6.89e-152
FASTKD2	SSBP1	0.696562	1.17e-148
FASTKD2	RPL26	0.687992	1.26e-143
FASTKD2	PSMA5	0.679218	1.19e-138
FASTKD2	GOT2	0.670485	7.18e-134
FASTKD2	YWHAG	0.668973	4.65e-133
FASTKD2	PGAM1	0.666027	1.72e-131
FASTKD2	RPS7	0.653181	7.27e-125
FASTKD2	XRCC6	0.652831	1.09e-124
FASTKD2	PPIA	0.648245	2.11e-122
FASTKD2	MYH10	0.646044	2.55e-121
FASTKD2	LDHA	0.644146	2.15e-120
FASTKD2	XPNPEP1	0.64272	1.06e-119
FASTKD2	TMPO	0.639523	3.65e-118
FASTKD2	ILF3	0.635509	2.93e-116
FASTKD2	TXN	0.629887	1.23e-113
FASTKD2	LAMP1	0.628002	9.02e-113
FASTKD2	PPP1R12A	0.627781	1.14e-112
FASTKD2	PABPC1	0.627031	2.51e-112
FASTKD2	RPS4X	0.625266	1.6e-111
FASTKD2	MDH2	0.625207	1.7e-111
FASTKD2	RPL11	0.621225	1.05e-109
FASTKD2	TMED9	0.61624	1.7e-107
FASTKD2	NDUFS1	0.615772	2.73e-107
FASTKD2	RPS25	0.614993	5.99e-107
FASTKD2	MDH1	0.597682	1.31e-99
FASTKD2	RPL23A	0.584961	1.69e-94
FASTKD2	RPS18	0.575442	8.13e-91
FASTKD2	RPS3A	0.575298	9.22e-91
FASTKD2	RPS13	0.568041	4.89e-88
FASTKD2	RPL7	0.56675	1.47e-87
FASTKD2	PSMB4	0.56668	1.56e-87
FASTKD2	RPS23	0.566353	2.06e-87
FASTKD2	MARCKS	0.565337	4.87e-87
FASTKD2	RPL19	0.560981	1.89e-85
FASTKD2	SIPA1L1	0.559759	5.22e-85
FASTKD2	RPL39	0.55694	5.36e-84
FASTKD2	NFS1	0.552255	2.44e-82
FASTKD2	RPL37	0.549852	1.69e-81
FASTKD2	MYH9	0.546592	2.29e-80
FASTKD2	LDHB	0.546229	3.05e-80
FASTKD2	RPL30	0.542365	6.4e-79
FASTKD2	U2AF1	0.534722	2.35e-76
FASTKD2	RPL6	0.532228	1.56e-75
FASTKD2	PFN1	0.531566	2.57e-75
FASTKD2	PSMA6	0.527314	6.22e-74
FASTKD2	RPS8	0.523951	7.49e-73
FASTKD2	RPS6	0.523444	1.09e-72
FASTKD2	RPL31	0.521801	3.62e-72
FASTKD2	RPL23	0.518196	4.96e-71
FASTKD2	RPS27	0.51508	4.64e-70
FASTKD2	RPL22L1	0.514572	6.68e-70
FASTKD2	RPL27	0.511755	4.93e-69
FASTKD2	RPS16	0.506011	2.74e-67
FASTKD2	RPL21	0.502327	3.47e-66
FASTKD2	VIM	0.495359	3.87e-64
FASTKD2	PCBD1	0.49532	3.97e-64
FASTKD2	TPI1	0.491715	4.37e-63
FASTKD2	SLC25A6	0.490946	7.26e-63
FASTKD2	SLC25A3	0.490506	9.7e-63
FASTKD2	HMGA1	0.484535	4.75e-61
FASTKD2	RPS20	0.478973	1.66e-59
FASTKD2	RPL7A	0.472877	7.62e-58
FASTKD2	RPS2	0.469851	4.94e-57
FASTKD2	LMO7	0.469024	8.21e-57
FASTKD2	LYZ	0.468904	8.84e-57
FASTKD2	RPS26	0.466462	3.92e-56
FASTKD2	RPL29	0.461338	8.61e-55
FASTKD2	RPL17	0.460547	1.38e-54
FASTKD2	RPS29	0.456136	1.88e-53
FASTKD2	PERP	0.444361	1.66e-50
FASTKD2	U2AF2	0.443779	2.3e-50
FASTKD2	JUP	0.441065	1.05e-49
FASTKD2	PPP1CA	0.436732	1.17e-48
FASTKD2	RPL27A	0.43655	1.29e-48
FASTKD2	RPL38	0.43092	2.77e-47
FASTKD2	NME1	0.427608	1.64e-46
FASTKD2	RPL34	0.422214	2.85e-45
FASTKD2	RPS14	0.411512	7.05e-43
FASTKD2	HSD17B10	0.408024	4.07e-42
FASTKD2	PRDX1	0.407682	4.83e-42
FASTKD2	MYL6	0.406121	1.05e-41
FASTKD2	RPS10	0.405341	1.55e-41
FASTKD2	PPP1R9B	0.398612	4.17e-40
FASTKD2	RPLP0	0.385333	2.23e-37
FASTKD2	PRDX2	0.378702	4.62e-36
FASTKD2	RPS11	0.377917	6.59e-36
FASTKD2	RPS19	0.37017	2.06e-34
FASTKD2	UBA52	0.367174	7.62e-34
FASTKD2	RPL4	0.363483	3.74e-33
FASTKD2	SUN2	0.33934	7.48e-29
FASTKD2	RPL3	0.328068	5.7e-27
FASTKD2	RPL28	0.315573	5.65e-25
FASTKD2	RPS5	0.306323	1.48e-23
FASTKD2	RPS3	0.292387	1.63e-21
FASTKD2	RPL13	0.291251	2.36e-21
FASTKD2	HSPA6	0.287017	9.31e-21
FASTKD2	IGF2BP3	0.285149	1.69e-20
FASTKD2	RPL8	0.283479	2.88e-20
FASTKD2	RPL13A	0.282849	3.51e-20
FASTKD2	RPS17	0.259927	3.51e-17
FASTKD2	HSPB1	0.254437	1.66e-16
FASTKD2	RPL18	0.251232	4.06e-16
FASTKD2	S100A8	0.250933	4.41e-16
FASTKD2	PHGDH	0.225006	3.77e-13
FASTKD2	S100A9	0.223391	5.59e-13
FASTKD2	GSDMA	0.223099	6e-13
FASTKD2	TGM1	0.216678	2.79e-12
FASTKD2	RPL35	0.216436	2.95e-12
FASTKD2	RPL18A	0.2148	4.33e-12
FASTKD2	UQCRC1	0.210855	1.08e-11
FASTKD2	RPL36	0.204393	4.61e-11
FASTKD2	GRN	0.203073	6.17e-11
FASTKD2	LTF	0.189029	1.21e-09
FASTKD2	GSN	0.183818	3.46e-09
FASTKD2	SBSN	0.177796	1.12e-08
FASTKD2	NES	0.176535	1.43e-08
FASTKD2	SHROOM3	0.172396	3.11e-08
FASTKD2	HPX	0.161365	2.27e-07
FASTKD2	TGM3	0.145105	3.34e-06
FASTKD2	GNB3	0.137376	1.09e-05
FASTKD2	HBB	0.136694	1.21e-05
FASTKD2	LMNA	0.0956665	0.00224607
FASTKD2	PKP1	0.0928781	0.00301552
FASTKD2	SLC27A2	0.0747802	0.0170162
FASTKD2	MYH14	0.0540227	0.0849258
FASTKD2	GPD1	0.0523868	0.0948102
FASTKD2	NCCRP1	0.0123596	0.693672
FASTKD2	S100A14	0.00536213	0.864321
FASTKD2	PLEC	0.000372417	0.990531
FASTKD2	SFN	-0.0144397	0.645392
FASTKD2	HBA2	-0.183228	3.89e-09
